# Supplementary material for: Potential for managed aquifer recharge in southwestern Bangladesh based on social necessity and technical suitability
Source: Springer Nature journal article supplement (doi:10.1007/s10040-020-02264-1), 2020-11-11
Supplement: MOESM1 [file 18578696]

**Potential for managed aquifer recharge in southwestern Bangladesh based on social necessity and technical suitability**

Floris Loys Naus<sup>1\*</sup>, Paul Schot<sup>1</sup>, Boris M. van Breukelen<sup>2</sup>, Kazi Matin Ahmed<sup>3</sup>, Jasper Griffioen<sup>1,4</sup>

<sup>1</sup> Copernicus Institute of Sustainable Development, Utrecht University, Utrecht, The Netherlands

<sup>2</sup> Department of Water Management, Delft University of Technology, Delft, The Netherlands

<sup>3</sup> Department of Geology, Dhaka University, Dhaka, Bangladesh

<sup>4</sup> TNO Geological Survey of the Netherlands, Utrecht, The Netherlands

[\\*Corresponding author: Floris Loys Naus \(f.l.naus@uu.nl\)](mailto:f.l.naus@uu.nl)

| Salinity 0-60 meter |               |          |          |          |         |                  |
|---------------------|---------------|----------|----------|----------|---------|------------------|
| ID                  | Data_source   | date     | Lat      | Long     | Depth_m | EC mS/cm Na_mg/L |
| 1_1                 | Abir_nov_2017 | 08.11.17 | 22,69655 | 89,07497 | 44,196  | 0,98             |
| 1_2                 | Abir_nov_2017 | 08.11.17 | 22,68584 | 89,05368 | 30,48   | 2,25             |
| 1_3                 | Abir_nov_2017 | 08.11.17 | 22,68554 | 89,05373 | 48,768  | 2,37             |
| 1_4                 | Abir_nov_2017 | 08.11.17 | 22,68404 | 89,05335 | 44,196  | 2,28             |
| 1_5                 | Abir_nov_2017 | 08.11.17 | 22,68214 | 89,05266 | 30,48   | 1,15             |
| 1_6                 | Abir_nov_2017 | 08.11.17 | 22,68007 | 89,0524  | 21,336  | 1,32             |
| 1_7                 | Abir_nov_2017 | 08.11.17 | 22,67849 | 89,05636 | 42,672  | 1,55             |
| 1_8                 | Abir_nov_2017 | 08.11.17 | 22,67835 | 89,05591 | 30,48   | 1,47             |
| 1_9                 | Abir_nov_2017 | 08.11.17 | 22,67819 | 89,05588 | 42,672  | 1,48             |
| 1_10                | Abir_nov_2017 | 08.11.17 | 22,6743  | 89,05695 | 56,388  | 1,76             |
| 1_11                | Abir_nov_2017 | 08.11.17 | 22,67088 | 89,06174 | 21,336  | 1,76             |
| 1_12                | Abir_nov_2017 | 08.11.17 | 22,6689  | 89,07278 | 42,672  | 0,83             |
| 1_13                | Abir_nov_2017 | 08.11.17 | 22,66881 | 89,07255 | 39,624  | 0,92             |
| 1_14                | Abir_nov_2017 | 08.11.17 | 22,67379 | 89,0718  | 35,052  | 0,8              |
| 1_15                | Abir_nov_2017 | 08.11.17 | 22,67449 | 89,07204 | 35,052  | 0,72             |
| 1_16                | Abir_nov_2017 | 09.11.17 | 22,6938  | 89,05818 | 30,48   | 0,73             |
| 1_17                | Abir_nov_2017 | 09.11.17 | 22,69104 | 89,05478 | 21,336  | 2,57             |
| 1_18                | Abir_nov_2017 | 09.11.17 | 22,69102 | 89,05676 | 21,336  | 1,53             |
| 1_19                | Abir_nov_2017 | 09.11.17 | 22,68947 | 89,05579 | 21,336  | 1,6              |
| 1_20                | Abir_nov_2017 | 09.11.17 | 22,69143 | 89,05896 | 24,384  | 1,15             |
| 1_21                | Abir_nov_2017 | 09.11.17 | 22,69215 | 89,05599 | 21,336  | 0,81             |
| 1_22                | Abir_nov_2017 | 09.11.17 | 22,69278 | 89,06687 | 16,764  | 0,87             |
| 1_23                | Abir_nov_2017 | 09.11.17 | 22,69403 | 89,06157 | 21,336  | 1,1              |
| 1_24                | Abir_nov_2017 | 09.11.17 | 22,69497 | 89,06144 | 24,384  | 0,81             |
| 1_25                | Abir_nov_2017 | 09.11.17 | 22,69389 | 89,05917 | 33,528  | 1,27             |
| 1_26                | Abir_nov_2017 | 09.11.17 | 22,69524 | 89,06107 | 42,672  | 0,7              |
| 1_27                | Abir_nov_2017 | 09.11.17 | 22,69139 | 89,05751 | 21,336  | 0,79             |
| 1_28                | Abir_nov_2017 | 09.11.17 | 22,69494 | 89,06017 | 25,908  | 0,94             |
| 1_29                | Abir_nov_2017 | 09.11.17 | 22,69493 | 89,06017 | 33,528  | 1,88             |
| 1_30                | Abir_nov_2017 | 09.11.17 | 22,69494 | 89,06027 | 12,192  | 2,57             |
| 1_31                | Abir_nov_2017 | 09.11.17 | 22,69445 | 89,05944 | 12,192  | 0,87             |
| 1_32                | Abir_nov_2017 | 09.11.17 | 22,69406 | 89,06247 | 33,528  | 1,41             |

|      |               |            |          |          |        |       |
|------|---------------|------------|----------|----------|--------|-------|
| 1_33 | Abir_nov_2017 | 09.11.17   | 22,69394 | 89,06268 | 21,336 | 1,32  |
| 1_34 | Abir_nov_2017 | 09.11.17   | 22,69299 | 89,06322 | 21,336 | 1,23  |
| 1_35 | Abir_nov_2017 | 09.11.17   | 22,69445 | 89,05944 | 12,192 | 0,87  |
| 1_36 | Abir_nov_2017 | 09.11.17   | 22,69156 | 89,05677 | 16,764 | 1,08  |
| 1_37 | Abir_nov_2017 | 09.11.17   | 22,69256 | 89,05861 | 21,336 | 0,94  |
| 1_38 | Abir_nov_2017 | 09.11.17   | 22,69195 | 89,05778 | 30,48  | 1,11  |
| 1_39 | Abir_nov_2015 | 15/11/2015 | 22,62992 | 89,51297 | 36,576 | 11,27 |
| 1_40 | Abir_nov_2015 | 15/11/2015 | 22,60249 | 89,52162 | 12,192 | 5,35  |
| 1_41 | Abir_nov_2015 | 15/11/2015 | 22,60217 | 89,52163 | 12,192 | 7,1   |
| 1_42 | Abir_nov_2015 | 15/11/2015 | 22,60059 | 89,51829 | 30,48  | 4,07  |
| 1_43 | Abir_nov_2015 | 15/11/2015 | 22,60031 | 89,51708 | 39,624 | 7,18  |
| 1_44 | Abir_nov_2015 | 15/11/2015 | 22,60145 | 89,51221 | 39,624 | 4,82  |
| 1_45 | Abir_nov_2015 | 15/11/2015 | 22,60261 | 89,51077 | 39,624 | 4,64  |
| 1_46 | Abir_nov_2015 | 15/11/2015 | 22,58971 | 89,51504 | 54,864 | 8,71  |
| 1_47 | Abir_nov_2015 | 15/11/2015 | 22,58994 | 89,51528 | 48,768 | 6,89  |
| 1_48 | Abir_nov_2015 | 15/11/2015 | 22,58975 | 89,504   | 36,576 | 6,13  |
| 1_49 | Abir_nov_2015 | 15/11/2015 | 22,59354 | 89,48595 | 45,72  | 7,82  |
| 1_50 | Abir_nov_2015 | 15/11/2015 | 22,59298 | 89,51071 | 44,196 | 6,03  |
| 1_51 | Abir_nov_2015 | 15/11/2015 | 22,60637 | 89,52148 | 48,768 | 5,74  |
| 1_52 | Abir_nov_2015 | 15/11/2015 | 22,6072  | 89,50779 | 19,812 | 3,39  |
| 1_53 | Abir_nov_2015 | 15/11/2015 | 22,61744 | 89,51225 | 30,48  | 3,23  |
| 1_54 | Abir_nov_2015 | 16/11/2015 | 22,58987 | 89,51559 | 53,34  | 6,01  |
| 1_55 | Abir_nov_2015 | 16/11/2015 | 22,5902  | 89,51511 | 45,72  | 6,54  |
| 1_56 | Abir_nov_2015 | 16/11/2015 | 22,59413 | 89,50734 | 51,816 | 4,04  |
| 1_57 | Abir_nov_2015 | 16/11/2015 | 22,59491 | 89,50657 | 51,816 | 2,48  |
| 1_58 | Abir_nov_2015 | 16/11/2015 | 22,59451 | 89,5088  | 14,478 | 4,68  |
| 1_59 | Abir_nov_2015 | 16/11/2015 | 22,59549 | 89,50935 | 16,764 | 5,78  |
| 1_60 | Abir_nov_2015 | 16/11/2015 | 22,59536 | 89,50927 | 18,288 | 4,97  |
| 1_61 | Abir_nov_2015 | 16/11/2015 | 22,59527 | 89,50941 | 21,336 | 4,3   |
| 1_62 | Abir_nov_2015 | 16/11/2015 | 22,59285 | 89,5111  | 32,004 | 5,9   |
| 1_63 | Abir_nov_2015 | 16/11/2015 | 22,59329 | 89,49322 | 35,052 | 3,94  |
| 1_64 | Abir_nov_2015 | 16/11/2015 | 22,59351 | 89,4932  | 33,528 | 3,61  |
| 1_65 | Abir_nov_2015 | 16/11/2015 | 22,59628 | 89,49401 | 30,48  | 2,66  |
| 1_66 | Abir_nov_2015 | 16/11/2015 | 22,59918 | 89,49277 | 30,48  | 3,57  |
| 1_67 | Abir_nov_2015 | 16/11/2015 | 22,60818 | 89,4971  | 44,196 | 3,25  |
| 1_68 | Abir_nov_2015 | 16/11/2015 | 22,60811 | 89,49751 | 30,48  | 3,13  |
| 1_69 | Abir_nov_2015 | 16/11/2015 | 22,6081  | 89,4967  | 30,48  | 2,63  |
| 1_70 | Abir_nov_2015 | 16/11/2015 | 22,60808 | 89,49873 | 21,336 | 2,78  |
| 1_71 | Abir_nov_2015 | 16/11/2015 | 22,60848 | 89,49847 | 41,148 | 3,15  |
| 1_72 | Abir_nov_2015 | 16/11/2015 | 22,6087  | 89,497   | 36,576 | 2,82  |
| 1_73 | Abir_nov_2015 | 16/11/2015 | 22,61348 | 89,49377 | 30,48  | 5,25  |
| 1_74 | Abir_nov_2015 | 16/11/2015 | 22,61839 | 89,51084 | 16,764 | 3,19  |
| 1_75 | Abir_nov_2015 | 16/11/2015 | 22,61448 | 89,51659 | 45,72  | 3,75  |
| 1_76 | Abir_nov_2015 | 17/11/2015 | 22,76595 | 89,56927 | 12,192 | 3,29  |
| 1_77 | Abir_nov_2015 | 18/11/2015 | 22,93747 | 89,48497 | 53,34  | 1,37  |
| 1_78 | Abir_nov_2015 | 18/11/2015 | 22,93325 | 89,49634 | 48,768 | 1,65  |
| 1_79 | Abir_nov_2015 | 18/11/2015 | 22,93208 | 89,49776 | 53,34  | 2,46  |

|       |               |            |          |          |        |      |
|-------|---------------|------------|----------|----------|--------|------|
| 1_80  | Abir_nov_2015 | 18/11/2015 | 22,89261 | 89,51447 | 53,34  | 1,31 |
| 1_81  | Abir_nov_2015 | 19/11/2015 | 22,8606  | 89,54184 | 53,34  | 4,89 |
| 1_82  | Abir_nov_2015 | 19/11/2015 | 22,84802 | 89,54277 | 30,48  | 1,07 |
| 1_83  | Abir_nov_2015 | 19/11/2015 | 22,85046 | 89,55141 | 53,34  | 1,68 |
| 1_84  | Abir_nov_2015 | 19/11/2015 | 22,85043 | 89,55407 | 30,48  | 1,86 |
| 1_85  | Abir_nov_2015 | 24/11/2015 | 22,77715 | 89,56979 | 30,48  | 0,96 |
| 1_86  | Abir_nov_2015 | 24/11/2015 | 22,79007 | 89,57464 | 24,384 | 0,81 |
| 1_87  | Abir_nov_2015 | 25/11/2015 | 22,89251 | 89,51028 | 53,34  | 1,49 |
| 1_88  | Abir_nov_2015 | 25/11/2015 | 22,89209 | 89,50905 | 53,34  | 1,11 |
| 1_89  | Abir_nov_2015 | 25/11/2015 | 22,89234 | 89,50925 | 51,816 | 1,14 |
| 1_90  | Abir_nov_2015 | 25/11/2015 | 22,89239 | 89,50823 | 54,864 | 1,05 |
| 1_91  | Abir_nov_2015 | 25/11/2015 | 22,89238 | 89,50822 | 54,864 | 1,06 |
| 1_92  | Abir_nov_2015 | 25/11/2015 | 22,89265 | 89,50817 | 54,864 | 1,06 |
| 1_93  | Abir_nov_2015 | 25/11/2015 | 22,89265 | 89,50835 | 54,864 | 1,08 |
| 1_94  | Abir_nov_2015 | 25/11/2015 | 22,89199 | 89,50817 | 53,34  | 1,1  |
| 1_95  | Abir_nov_2015 | 25/11/2015 | 22,89408 | 89,50893 | 53,34  | 1,24 |
| 1_96  | Abir_nov_2015 | 25/11/2015 | 22,89433 | 89,50903 | 53,34  | 1,27 |
| 1_97  | Abir_nov_2015 | 25/11/2015 | 22,90053 | 89,50061 | 54,864 | 5,25 |
| 1_98  | Abir_nov_2015 | 25/11/2015 | 22,90053 | 89,50061 | 54,864 | 4,65 |
| 1_99  | Abir_nov_2015 | 25/11/2015 | 22,90053 | 89,50061 | 54,864 | 4,84 |
| 1_100 | Abir_nov_2015 | 25/11/2015 | 22,9014  | 89,49998 | 54,864 | 3,48 |
| 1_101 | Abir_nov_2015 | 25/11/2015 | 22,90116 | 89,49948 | 54,864 | 3,19 |
| 1_102 | Abir_nov_2015 | 25/11/2015 | 22,89783 | 89,50711 | 48,768 | 4,99 |
| 1_103 | Abir_nov_2015 | 25/11/2015 | 22,89671 | 89,50478 | 53,34  | 4,8  |
| 1_104 | Abir_nov_2015 | 25/11/2015 | 22,89699 | 89,50321 | 53,34  | 3,36 |
| 1_105 | Abir_nov_2015 | 25/11/2015 | 22,89745 | 89,49883 | 48,768 | 5,01 |
| 1_106 | Abir_nov_2015 | 25/11/2015 | 22,89522 | 89,48991 | 39,624 | 3,43 |
| 1_107 | Abir_nov_2015 | 25/11/2015 | 22,89526 | 89,48997 | 30,48  | 7,57 |
| 1_108 | Abir_nov_2015 | 25/11/2015 | 22,89579 | 89,49025 | 30,48  | 4,75 |
| 1_109 | Abir_nov_2015 | 25/11/2015 | 22,89415 | 89,49028 | 48,768 | 7,02 |
| 1_110 | Abir_nov_2015 | 26/11/2015 | 22,99688 | 89,44946 | 56,388 | 0,69 |
| 1_111 | Abir_nov_2015 | 26/11/2015 | 22,98874 | 89,46925 | 21,336 | 1,38 |
| 1_112 | Abir_nov_2015 | 27/12/2015 | 22,8067  | 89,56574 | 33,528 | 2,1  |
| 1_113 | Abir_nov_2015 | 27/12/2015 | 22,80674 | 89,5651  | 36,576 | 2    |
| 1_114 | Abir_nov_2015 | 27/12/2015 | 22,80674 | 89,56506 | 33,528 | 1,7  |
| 1_115 | Abir_nov_2015 | 27/12/2015 | 22,80471 | 89,56635 | 36,576 | 0,5  |
| 1_116 | Abir_nov_2015 | 27/12/2015 | 22,80232 | 89,56705 | 39,624 | 2,5  |
| 1_117 | Abir_nov_2015 | 27/12/2015 | 22,80239 | 89,56654 | 30,48  | 3,1  |
| 1_118 | Abir_nov_2015 | 27/12/2015 | 22,79938 | 89,56649 | 30,48  | 0,6  |
| 1_119 | Abir_nov_2015 | 27/12/2015 | 22,79827 | 89,56727 | 21,336 | 2,2  |
| 1_120 | Abir_nov_2015 | 27/12/2015 | 22,7983  | 89,56725 | 18,288 | 0,6  |
| 1_121 | Abir_nov_2015 | 27/12/2015 | 22,80851 | 89,55375 | 51,816 | 2,4  |
| 1_122 | Abir_nov_2015 | 27/12/2015 | 22,80861 | 89,55235 | 51,816 | 1,94 |
| 1_123 | Abir_nov_2015 | 28/12/2015 | 22,91692 | 89,48386 | 21,336 | 6,38 |
| 1_124 | Abir_nov_2015 | 28/12/2015 | 22,91908 | 89,48639 | 33,528 | 6,53 |
| 1_125 | Abir_nov_2015 | 28/12/2015 | 22,8967  | 89,48723 | 21,336 | 4,77 |
| 1_126 | Abir_nov_2015 | 28/12/2015 | 22,89682 | 89,48738 | 21,336 | 4,2  |

|       |               |            |          |          |        |       |
|-------|---------------|------------|----------|----------|--------|-------|
| 1_127 | Abir_nov_2015 | 28/12/2015 | 22,89672 | 89,48747 | 33,528 | 3,04  |
| 1_128 | Abir_nov_2015 | 28/12/2015 | 22,89691 | 89,48801 | 33,528 | 3,2   |
| 1_129 | Abir_nov_2015 | 28/12/2015 | 22,89708 | 89,48936 | 33,528 | 3,3   |
| 1_130 | Abir_nov_2015 | 28/12/2015 | 22,89583 | 89,49036 | 21,336 | 7,67  |
| 1_131 | Abir_nov_2015 | 28/12/2015 | 22,89582 | 89,49045 | 33,528 | 4,48  |
| 1_132 | Abir_nov_2015 | 28/12/2015 | 22,89566 | 89,49077 | 33,528 | 3,75  |
| 1_133 | Abir_nov_2015 | 28/12/2015 | 22,89468 | 89,49414 | 33,528 | 3,79  |
| 1_134 | Abir_nov_2015 | 28/12/2015 | 22,89431 | 89,49389 | 33,528 | 3,12  |
| 1_135 | Abir_nov_2015 | 28/12/2015 | 22,89412 | 89,49384 | 51,816 | 2,6   |
| 1_136 | Abir_nov_2015 | 28/12/2015 | 22,89414 | 89,49408 | 33,528 | 3,81  |
| 1_137 | Abir_nov_2015 | 28/12/2015 | 22,89362 | 89,49439 | 33,528 | 3,66  |
| 1_138 | Abir_nov_2015 | 28/12/2015 | 22,893   | 89,49249 | 24,384 | 3,94  |
| 1_139 | Abir_nov_2015 | 28/12/2015 | 22,89346 | 89,49252 | 32,004 | 4,45  |
| 1_140 | Abir_nov_2015 | 28/12/2015 | 22,88994 | 89,49601 | 33,528 | 2,48  |
| 1_141 | Abir_nov_2015 | 28/12/2015 | 22,88951 | 89,49991 | 33,528 | 4,39  |
| 1_142 | Abir_nov_2015 | 28/12/2015 | 22,88953 | 89,50025 | 51,816 | 4,55  |
| 1_143 | Abir_nov_2015 | 29/12/2015 | 22,82481 | 89,52906 | 12,192 | 7,67  |
| 1_144 | Abir_nov_2015 | 29/12/2015 | 22,81462 | 89,53889 | 33,528 | 4,48  |
| 1_145 | Abir_nov_2015 | 29/12/2015 | 22,83263 | 89,51784 | 30,48  | 9,14  |
| 1_146 | Abir_nov_2015 | 29/12/2015 | 22,80839 | 89,53531 | 51,816 | 8,51  |
| 1_147 | Abir_nov_2015 | 29/12/2015 | 22,79314 | 89,53641 | 12,192 | 10,44 |
| 1_148 | Abir_nov_2015 | 30/12/2015 | 22,82674 | 89,53705 | 30,48  | 7,1   |
| 1_149 | Abir_nov_2015 | 30/12/2015 | 22,84745 | 89,53863 | 51,816 | 3,65  |
| 1_150 | Abir_nov_2015 | 30/12/2015 | 22,84752 | 89,53869 | 51,816 | 3,78  |
| 1_151 | Abir_nov_2015 | 30/12/2015 | 22,84747 | 89,53869 | 56,388 | 3,9   |
| 1_152 | Abir_nov_2015 | 30/12/2015 | 22,8558  | 89,52926 | 51,816 | 3,37  |
| 1_153 | Abir_nov_2015 | 30/12/2015 | 22,856   | 89,52916 | 51,816 | 3,68  |
| 1_154 | Abir_nov_2015 | 30/12/2015 | 22,85555 | 89,52794 | 51,816 | 3,48  |
| 1_155 | Abir_nov_2015 | 30/12/2015 | 22,85542 | 89,52998 | 51,816 | 3,68  |
| 1_156 | Abir_nov_2015 | 30/12/2015 | 22,85993 | 89,53146 | 51,816 | 4,51  |
| 1_157 | Abir_nov_2015 | 30/12/2015 | 22,86602 | 89,52552 | 51,816 | 1,01  |
| 1_158 | Abir_nov_2015 | 30/12/2015 | 22,86753 | 89,51952 | 54,864 | 2,17  |
| 1_159 | Abir_nov_2015 | 06/01/2016 | 22,88939 | 89,49454 | 30,48  | 7,3   |
| 1_160 | Abir_nov_2015 | 06/01/2016 | 22,88329 | 89,50541 | 36,576 | 2,79  |
| 1_161 | Abir_nov_2015 | 06/01/2016 | 22,88147 | 89,4997  | 30,48  | 4,59  |
| 1_162 | Abir_nov_2015 | 07/01/2016 | 22,78522 | 89,58872 | 36,576 | 2,69  |
| 1_163 | Abir_nov_2015 | 07/01/2016 | 22,79449 | 89,58804 | 30,48  | 3,48  |
| 1_164 | Abir_nov_2015 | 07/01/2016 | 22,77632 | 89,60267 | 30,48  | 2,45  |
| 1_165 | Abir_nov_2015 | 07/01/2016 | 22,75807 | 89,60645 | 30,48  | 2,74  |
| 1_166 | Abir_nov_2015 | 04/02/2016 | 22,62712 | 89,51608 | 36,576 | 3,88  |
| 1_167 | Abir_nov_2015 | 04/02/2016 | 22,6282  | 89,51458 | 36,576 | 4,48  |
| 1_168 | Abir_nov_2015 | 04/02/2016 | 22,62813 | 89,51473 | 12,192 | 3,28  |
| 1_169 | Abir_nov_2015 | 04/02/2016 | 22,62781 | 89,5146  | 21,336 | 3,26  |
| 1_170 | Abir_nov_2015 | 04/02/2016 | 22,61741 | 89,51495 | 36,576 | 4,12  |
| 1_171 | Abir_nov_2015 | 04/02/2016 | 22,61845 | 89,51084 | 36,576 | 3,68  |
| 1_172 | Abir_nov_2015 | 06/02/2016 | 22,89849 | 89,49919 | 36,576 | 4,16  |
| 1_173 | Abir_nov_2015 | 06/02/2016 | 22,89849 | 89,49918 | 36,576 | 4,42  |

|       |               |            |          |          |        |       |
|-------|---------------|------------|----------|----------|--------|-------|
| 1_174 | Abir_nov_2015 | 06/02/2016 | 22,89584 | 89,48575 | 36,576 | 6,8   |
| 1_175 | Abir_nov_2015 | 06/02/2016 | 22,89617 | 89,48355 | 48,768 | 6,55  |
| 1_176 | Abir_nov_2015 | 06/02/2016 | 22,89485 | 89,48236 | 33,528 | 4,11  |
| 1_177 | Abir_nov_2015 | 06/02/2016 | 22,89359 | 89,50539 | 30,48  | 1,82  |
| 1_178 | Abir_nov_2015 | 06/02/2016 | 22,89052 | 89,50614 | 57,912 | 1,28  |
| 1_179 | Abir_nov_2015 | 06/02/2016 | 22,89043 | 89,5061  | 57,912 | 1,98  |
| 1_180 | Abir_nov_2015 | 06/02/2016 | 22,88953 | 89,50737 | 48,768 | 1,1   |
| 1_181 | Abir_nov_2015 | 06/02/2016 | 22,89893 | 89,49014 | 33,528 | 5     |
| 1_182 | Abir_nov_2015 | 06/02/2016 | 22,89938 | 89,48804 | 30,48  | 3,66  |
| 1_183 | Abir_nov_2015 | 06/02/2016 | 22,89965 | 89,48778 | 21,336 | 3,34  |
| 1_184 | Abir_nov_2015 | 06/02/2016 | 22,89956 | 89,48722 | 21,336 | 3,27  |
| 1_185 | Abir_nov_2015 | 06/02/2016 | 22,90169 | 89,48596 | 21,336 | 5,74  |
| 1_186 | Abir_nov_2015 | 06/02/2016 | 22,90078 | 89,48557 | 18,288 | 3,15  |
| 1_187 | Abir_nov_2015 | 06/02/2016 | 22,89775 | 89,49487 | 33,528 | 2,53  |
| 1_188 | Abir_nov_2015 | 06/02/2016 | 22,89757 | 89,49483 | 21,336 | 4,12  |
| 1_189 | Abir_nov_2015 | 06/02/2016 | 22,89761 | 89,49372 | 57,912 | 2,52  |
| 1_190 | Abir_nov_2015 | 06/02/2016 | 22,89988 | 89,49134 | 21,336 | 4,78  |
| 1_191 | Abir_nov_2015 | 06/02/2016 | 22,89854 | 89,49324 | 21,336 | 5,07  |
| 1_192 | Abir_nov_2015 | 06/02/2016 | 22,8966  | 89,49286 | 36,576 | 3,02  |
| 1_193 | Abir_nov_2015 | 13/03/2016 | 22,83612 | 89,50566 | 36,576 | 7,65  |
| 1_194 | Abir_nov_2015 | 13/03/2016 | 22,83626 | 89,50557 | 33,528 | 7,23  |
| 1_195 | Abir_nov_2015 | 14/03/2016 | 22,79768 | 89,06353 | 36,576 | 0,78  |
| 1_196 | Abir_nov_2015 | 15/03/2016 | 22,67871 | 89,07787 | 30,48  | 0,86  |
| 1_197 | Abir_nov_2015 | 15/03/2016 | 22,74347 | 89,06046 | 54,864 | 0,89  |
| 1_198 | Abir_nov_2015 | 15/03/2016 | 22,75274 | 89,06363 | 30,48  | 0,86  |
| 1_199 | Abir_nov_2015 | 15/03/2016 | 22,76171 | 89,0664  | 24,384 | 0,84  |
| 1_200 | Abir_nov_2015 | 15/03/2016 | 22,77689 | 89,05111 | 30,48  | 0,8   |
| 1_201 | Abir_nov_2015 | 15/03/2016 | 22,77609 | 89,05328 | 39,624 | 0,79  |
| 1_202 | Abir_nov_2015 | 15/03/2016 | 22,74922 | 89,05547 | 47,244 | 0,59  |
| 1_203 | Abir_nov_2015 | 16/03/2016 | 22,75214 | 89,10821 | 33,528 | 0,93  |
| 1_204 | Abir_nov_2015 | 16/03/2016 | 22,75275 | 89,10565 | 9,144  | 10,61 |
| 1_205 | Abir_nov_2015 | 16/03/2016 | 22,75178 | 89,10542 | 36,576 | 2,01  |
| 1_206 | Abir_nov_2015 | 16/03/2016 | 22,71847 | 89,05593 | 16,764 | 1,18  |
| 1_207 | Abir_nov_2015 | 16/03/2016 | 22,7213  | 89,05362 | 18,288 | 2,79  |
| 1_208 | Abir_nov_2015 | 16/03/2016 | 22,72122 | 89,05367 | 18,288 | 1,01  |
| 1_209 | Abir_nov_2015 | 16/03/2016 | 22,72089 | 89,05215 | 16,764 | 1,15  |
| 1_210 | Abir_nov_2015 | 16/03/2016 | 22,72374 | 89,05011 | 16,764 | 0,95  |
| 1_211 | Abir_nov_2015 | 16/03/2016 | 22,72352 | 89,05831 | 16,764 | 0,85  |
| 1_212 | Abir_nov_2015 | 16/03/2016 | 22,69665 | 89,07377 | 33,528 | 2,01  |
| 1_213 | Abir_nov_2015 | 23/03/2016 | 22,66814 | 89,78991 | 12,192 | 3,63  |
| 1_214 | Abir_nov_2015 | 23/03/2016 | 22,66909 | 89,78932 | 12,192 | 4,77  |
| 1_215 | Abir_nov_2015 | 23/03/2016 | 22,67239 | 89,78626 | 21,336 | 2,7   |
| 1_216 | Abir_nov_2015 | 23/03/2016 | 22,68076 | 89,79252 | 21,336 | 3,02  |
| 1_217 | Abir_nov_2015 | 23/03/2016 | 22,68899 | 89,80045 | 21,336 | 1,56  |
| 1_218 | Abir_nov_2015 | 23/03/2016 | 22,70191 | 89,79477 | 21,336 | 3,2   |
| 1_219 | Abir_nov_2015 | 23/03/2016 | 22,70479 | 89,79929 | 36,576 | 8,68  |
| 1_220 | Abir_nov_2015 | 23/03/2016 | 22,70448 | 89,79922 | 36,576 | 7,28  |

|       |               |            |          |          |         |       |
|-------|---------------|------------|----------|----------|---------|-------|
| 1_221 | Abir_nov_2015 | 24/03/2016 | 22,64689 | 89,79369 | 12,192  | 3,61  |
| 1_222 | Abir_nov_2015 | 24/03/2016 | 22,64779 | 89,79846 | 21,336  | 6,41  |
| 1_223 | Abir_nov_2015 | 24/03/2016 | 22,65298 | 89,79861 | 10,668  | 3     |
| 1_224 | Abir_nov_2015 | 24/03/2016 | 22,65849 | 89,79628 | 6,7056  | 2,02  |
| 1_225 | Abir_nov_2015 | 24/03/2016 | 22,64236 | 89,81065 | 12,192  | 3,46  |
| 1_226 | Abir_nov_2015 | 24/03/2016 | 22,64079 | 89,81052 | 36,576  | 3,13  |
| 1_227 | Abir_nov_2015 | 24/03/2016 | 22,63686 | 89,81037 | 16,764  | 3,16  |
| 1_228 | Abir_nov_2015 | 24/03/2016 | 22,63484 | 89,81028 | 16,764  | 3,31  |
| 1_229 | Abir_nov_2015 | 24/03/2016 | 22,62641 | 89,81447 | 15,24   | 8,3   |
| 1_230 | Abir_nov_2015 | 24/03/2016 | 22,62895 | 89,81222 | 36,576  | 4,09  |
| 1_231 | Abir_nov_2015 | 24/03/2016 | 22,64581 | 89,77196 | 30,48   | 1,22  |
| 1_232 | Abir_nov_2015 | 28/03/2016 | 22,6429  | 89,76956 | 15,24   | 1     |
| 1_233 | Abir_nov_2015 | 28/03/2016 | 22,64281 | 89,76942 | 12,192  | 3,21  |
| 1_234 | Abir_nov_2015 | 28/03/2016 | 22,64133 | 89,76926 | 21,336  | 1,38  |
| 1_235 | Abir_nov_2015 | 28/03/2016 | 22,63442 | 89,77747 | 21,336  | 4,95  |
| 1_236 | Abir_nov_2015 | 28/03/2016 | 22,6345  | 89,77714 | 25,908  | 5,1   |
| 1_237 | Abir_nov_2015 | 28/03/2016 | 22,64234 | 89,77435 | 21,336  | 4,9   |
| 1_238 | Abir_nov_2015 | 29/03/2016 | 22,66856 | 89,75413 | 12,192  | 0,95  |
| 1_239 | Abir_nov_2015 | 29/03/2016 | 22,66889 | 89,75397 | 30,48   | 1,07  |
| 1_240 | Abir_nov_2015 | 29/03/2016 | 22,67215 | 89,75214 | 16,764  | 0,91  |
| 1_241 | Abir_nov_2015 | 29/03/2016 | 22,67236 | 89,75206 | 12,192  | 0,95  |
| 1_242 | Abir_nov_2015 | 29/03/2016 | 22,67231 | 89,75105 | 45,72   | 1,4   |
| 1_243 | Abir_nov_2015 | 29/03/2016 | 22,66379 | 89,75301 | 21,336  | 0,81  |
| 1_244 | Abir_nov_2015 | 29/03/2016 | 22,66226 | 89,75348 | 21,336  | 0,81  |
| 1_245 | Abir_nov_2015 | 29/03/2016 | 22,64227 | 89,81116 | 21,336  | 3,72  |
| 1_246 | Abir_nov_2015 | 29/03/2016 | 22,64632 | 89,81538 | 48,768  | 12,93 |
| 1_247 | Abir_nov_2015 | 29/03/2016 | 22,64945 | 89,80816 | 16,764  | 1,73  |
| 1_248 | Abir_nov_2015 | 29/03/2016 | 22,64944 | 89,80812 | 21,336  | 2,2   |
| 1_249 | Abir_nov_2015 | 29/03/2016 | 22,64952 | 89,80835 | 21,336  | 2,06  |
| 1_250 | Abir_nov_2015 | 30/03/2016 | 22,67086 | 89,79172 | 21,336  | 7,47  |
| 1_251 | Abir_nov_2015 | 30/03/2016 | 22,67373 | 89,79291 | 39,624  | 4,77  |
| 1_252 | Abir_nov_2015 | 30/03/2016 | 22,68438 | 89,80374 | 36,576  | 2,67  |
| 1_253 | Abir_nov_2015 | 30/03/2016 | 22,67913 | 89,84271 | 13,716  | 3,8   |
| 1_254 | Abir_nov_2015 | 30/03/2016 | 22,67942 | 89,84235 | 12,192  | 1,34  |
| 1_255 | Abir_nov_2015 | 30/03/2016 | 22,66565 | 89,84871 | 21,336  | 2,07  |
| 1_256 | Abir_nov_2015 | 30/03/2016 | 22,65369 | 89,87151 | 24,384  | 1,28  |
| 1_257 | Abir_nov_2015 | 30/03/2016 | 22,62645 | 89,83863 | 22,5552 | 3,87  |
| 1_258 | Abir_nov_2015 | 30/03/2016 | 22,62666 | 89,83875 | 22,2504 | 4,05  |
| 1_259 | Abir_nov_2015 | 30/03/2016 | 22,62495 | 89,83324 | 12,192  | 2,65  |
| 1_260 | Abir_nov_2015 | 30/03/2016 | 22,62653 | 89,83016 | 25,908  | 4,92  |
| 1_261 | Abir_nov_2015 | 03/04/2016 | 22,61451 | 89,83006 | 12,192  | 3,66  |
| 1_262 | Abir_nov_2015 | 03/04/2016 | 22,61438 | 89,83027 | 21,336  | 4,81  |
| 1_263 | Abir_nov_2015 | 03/04/2016 | 22,61562 | 89,83205 | 19,812  | 4,01  |
| 1_264 | Abir_nov_2015 | 03/04/2016 | 22,63362 | 89,85152 | 12,192  | 4,21  |
| 1_265 | Abir_nov_2015 | 05/04/2016 | 22,61876 | 89,83909 | 15,24   | 5,07  |
| 1_266 | Abir_nov_2015 | 05/04/2016 | 22,62427 | 89,85461 | 16,764  | 2,53  |
| 1_267 | Abir_nov_2015 | 05/04/2016 | 22,64269 | 89,90511 | 19,812  | 0,85  |

|       |               |            |          |          |         |      |
|-------|---------------|------------|----------|----------|---------|------|
| 1_268 | Abir_nov_2015 | 05/04/2016 | 22,64273 | 89,90507 | 16,764  | 0,74 |
| 1_269 | Abir_nov_2015 | 05/04/2016 | 22,64271 | 89,90517 | 21,336  | 0,83 |
| 1_270 | Abir_nov_2015 | 05/04/2016 | 22,65273 | 89,89566 | 19,812  | 4,31 |
| 1_271 | Abir_nov_2015 | 05/04/2016 | 22,65275 | 89,89578 | 21,336  | 3,88 |
| 1_272 | Abir_nov_2015 | 05/04/2016 | 22,65278 | 89,89581 | 19,812  | 3,44 |
| 1_273 | Abir_nov_2015 | 06/04/2016 | 22,62726 | 89,82026 | 16,764  | 3,26 |
| 1_274 | Abir_nov_2015 | 06/04/2016 | 22,62371 | 89,82732 | 35,052  | 4,38 |
| 1_275 | Abir_nov_2015 | 06/04/2016 | 22,63754 | 89,83619 | 16,764  | 4,5  |
| 1_276 | Abir_nov_2015 | 06/04/2016 | 22,63767 | 89,8363  | 15,24   | 5,02 |
| 1_277 | Abir_nov_2015 | 06/04/2016 | 22,64233 | 89,84807 | 36,576  | 3,69 |
| 1_278 | Abir_nov_2015 | 10/04/2016 | 22,46767 | 89,86126 | 36,576  | 3,15 |
| 1_279 | Abir_nov_2015 | 10/04/2016 | 22,46591 | 89,86823 | 16,764  | 2,09 |
| 1_280 | Abir_nov_2015 | 10/04/2016 | 22,46561 | 89,86868 | 30,48   | 2,52 |
| 1_281 | Abir_nov_2015 | 10/04/2016 | 22,46256 | 89,87019 | 12,192  | 2,44 |
| 1_282 | Abir_nov_2015 | 10/04/2016 | 22,46203 | 89,87411 | 18,288  | 2,54 |
| 1_283 | Abir_nov_2015 | 10/04/2016 | 22,46267 | 89,88454 | 16,764  | 3,01 |
| 1_284 | Abir_nov_2015 | 10/04/2016 | 22,46216 | 89,88457 | 21,336  | 2,94 |
| 1_285 | Abir_nov_2015 | 10/04/2016 | 22,46751 | 89,88601 | 16,764  | 2,66 |
| 1_286 | Abir_nov_2015 | 10/04/2016 | 22,45774 | 89,89077 | 21,336  | 3,86 |
| 1_287 | Abir_nov_2015 | 10/04/2016 | 22,46271 | 89,88946 | 21,336  | 3,87 |
| 1_288 | Abir_nov_2015 | 10/04/2016 | 22,46206 | 89,88901 | 36,576  | 1,93 |
| 1_289 | Abir_nov_2015 | 10/04/2016 | 22,46221 | 89,88946 | 21,336  | 3,86 |
| 1_290 | Abir_nov_2015 | 10/04/2016 | 22,46185 | 89,90282 | 12,192  | 2,96 |
| 1_291 | Abir_nov_2015 | 10/04/2016 | 22,46337 | 89,91423 | 12,192  | 2,13 |
| 1_292 | Abir_nov_2015 | 10/04/2016 | 22,45133 | 89,91484 | 24,384  | 3,92 |
| 1_293 | Abir_nov_2015 | 11/04/2016 | 22,46813 | 89,85361 | 16,764  | 3,73 |
| 1_294 | Abir_nov_2015 | 11/04/2016 | 22,46845 | 89,85299 | 12,192  | 3,65 |
| 1_295 | Abir_nov_2015 | 11/04/2016 | 22,46995 | 89,85268 | 15,24   | 3,42 |
| 1_296 | Abir_nov_2015 | 11/04/2016 | 22,48196 | 89,83861 | 30,48   | 3,55 |
| 1_297 | Abir_nov_2015 | 11/04/2016 | 22,48118 | 89,82688 | 12,192  | 6,58 |
| 1_298 | Abir_nov_2015 | 11/04/2016 | 22,48178 | 89,82471 | 11,5824 | 5,48 |
| 1_299 | Abir_nov_2015 | 11/04/2016 | 22,44928 | 89,84808 | 18,288  | 4,18 |
| 1_300 | Abir_nov_2015 | 11/04/2016 | 22,44914 | 89,84818 | 21,336  | 5,39 |
| 1_301 | Abir_nov_2015 | 11/04/2016 | 22,44929 | 89,84818 | 12,192  | 5,37 |
| 1_302 | Abir_nov_2015 | 11/04/2016 | 22,44904 | 89,84806 | 21,336  | 5,23 |
| 1_303 | Abir_nov_2015 | 11/04/2016 | 22,4494  | 89,84748 | 25,908  | 3,12 |
| 1_304 | Abir_nov_2015 | 12/04/2016 | 22,44907 | 89,85713 | 16,764  | 3,12 |
| 1_305 | Abir_nov_2015 | 12/04/2016 | 22,44941 | 89,85728 | 21,336  | 3,16 |
| 1_306 | Abir_nov_2015 | 12/04/2016 | 22,44911 | 89,85773 | 21,336  | 3,17 |
| 1_307 | Abir_nov_2015 | 12/04/2016 | 22,44913 | 89,85754 | 21,336  | 3,07 |
| 1_308 | Abir_nov_2015 | 12/04/2016 | 22,44884 | 89,85825 | 18,288  | 3,61 |
| 1_309 | Abir_nov_2015 | 12/04/2016 | 22,44935 | 89,85823 | 18,288  | 3,48 |
| 1_310 | Abir_nov_2015 | 12/04/2016 | 22,44926 | 89,85902 | 16,764  | 3,18 |
| 1_311 | Abir_nov_2015 | 12/04/2016 | 22,44971 | 89,86031 | 18,288  | 2,88 |
| 1_312 | Abir_nov_2015 | 12/04/2016 | 22,44667 | 89,86028 | 18,288  | 2,49 |
| 1_313 | Abir_nov_2015 | 12/04/2016 | 22,44645 | 89,86023 | 21,336  | 2,71 |
| 1_314 | Abir_nov_2015 | 12/04/2016 | 22,44637 | 89,8601  | 21,336  | 2,35 |

|       |               |            |          |          |        |      |
|-------|---------------|------------|----------|----------|--------|------|
| 1_315 | Abir_nov_2015 | 12/04/2016 | 22,45122 | 89,85693 | 16,764 | 2,36 |
| 1_316 | Abir_nov_2015 | 12/04/2016 | 22,45073 | 89,85667 | 21,336 | 2,59 |
| 1_317 | Abir_nov_2015 | 12/04/2016 | 22,46126 | 89,85426 | 18,288 | 2,77 |
| 1_318 | Abir_nov_2015 | 12/04/2016 | 22,45359 | 89,85024 | 21,336 | 4,07 |
| 1_319 | Abir_nov_2015 | 12/04/2016 | 22,45516 | 89,84766 | 16,764 | 6,7  |
| 1_320 | Abir_nov_2015 | 12/04/2016 | 22,44616 | 89,85111 | 21,336 | 2,45 |
| 1_321 | Abir_nov_2015 | 12/04/2016 | 22,43914 | 89,84883 | 16,764 | 5,16 |
| 1_322 | Abir_nov_2015 | 12/04/2016 | 22,44391 | 89,8548  | 21,336 | 2,83 |
| 1_323 | Abir_nov_2015 | 12/04/2016 | 22,43979 | 89,85395 | 16,764 | 2,5  |
| 1_324 | Abir_nov_2015 | 12/04/2016 | 22,43982 | 89,85389 | 21,336 | 2,71 |
| 1_325 | Abir_nov_2015 | 12/04/2016 | 22,44581 | 89,85526 | 21,336 | 2,67 |
| 1_326 | Abir_nov_2015 | 12/04/2016 | 22,44599 | 89,85535 | 36,576 | 2,11 |
| 1_327 | Abir_nov_2015 | 17/04/2016 | 22,69427 | 89,05659 | 30,48  | 0,95 |
| 1_328 | Abir_nov_2015 | 17/04/2016 | 22,68721 | 89,05514 | 12,192 | 2,88 |
| 1_329 | Abir_nov_2015 | 17/04/2016 | 22,68464 | 89,05386 | 47,244 | 2,51 |
| 1_330 | Abir_nov_2015 | 17/04/2016 | 22,45765 | 89,03001 | 24,384 | 5,81 |
| 1_331 | Abir_nov_2015 | 18/04/2016 | 22,46114 | 89,02684 | 30,48  | 2,12 |
| 1_332 | Abir_nov_2015 | 18/04/2016 | 22,47214 | 89,01978 | 25,908 | 4,77 |
| 1_333 | Abir_nov_2015 | 18/04/2016 | 22,47792 | 89,00789 | 30,48  | 3,49 |
| 1_334 | Abir_nov_2015 | 18/04/2016 | 22,39309 | 89,07468 | 12,192 | 3,05 |
| 1_335 | Abir_nov_2015 | 18/04/2016 | 22,39299 | 89,07469 | 12,192 | 3,1  |
| 1_336 | Abir_nov_2015 | 18/04/2016 | 22,39321 | 89,07454 | 16,764 | 2,8  |
| 1_337 | Abir_nov_2015 | 18/04/2016 | 22,39567 | 89,07648 | 30,48  | 2,55 |
| 1_338 | Abir_nov_2015 | 18/04/2016 | 22,39642 | 89,07849 | 30,48  | 1,14 |
| 1_339 | Abir_nov_2015 | 18/04/2016 | 22,39849 | 89,08029 | 21,336 | 1,43 |
| 1_340 | Abir_nov_2015 | 18/04/2016 | 22,3984  | 89,07939 | 30,48  | 1,06 |
| 1_341 | Abir_nov_2015 | 18/04/2016 | 22,39762 | 89,08262 | 39,624 | 3,34 |
| 1_342 | Abir_nov_2015 | 18/04/2016 | 22,39741 | 89,08295 | 57,912 | 5,58 |
| 1_343 | Abir_nov_2015 | 18/04/2016 | 22,39787 | 89,08318 | 53,34  | 4,41 |
| 1_344 | Abir_nov_2015 | 18/04/2016 | 22,40168 | 89,08418 | 41,148 | 5,41 |
| 1_345 | Abir_nov_2015 | 18/04/2016 | 22,40166 | 89,08301 | 16,764 | 1,72 |
| 1_346 | Abir_nov_2015 | 19/04/2016 | 22,78919 | 89,06924 | 51,816 | 1,3  |
| 1_347 | Abir_nov_2015 | 19/04/2016 | 22,78938 | 89,06892 | 45,72  | 1,6  |
| 1_348 | Abir_nov_2015 | 19/04/2016 | 22,78947 | 89,06898 | 32,004 | 0,67 |
| 1_349 | Abir_nov_2015 | 19/04/2016 | 22,79007 | 89,07167 | 39,624 | 0,41 |
| 1_350 | Abir_nov_2015 | 19/04/2016 | 22,791   | 89,07583 | 51,816 | 0,67 |
| 1_351 | Abir_nov_2015 | 19/04/2016 | 22,79103 | 89,08011 | 36,576 | 1,05 |
| 1_352 | Abir_nov_2015 | 19/04/2016 | 22,78747 | 89,08471 | 33,528 | 1,35 |
| 1_353 | Abir_nov_2015 | 19/04/2016 | 22,79485 | 89,07749 | 24,384 | 0,5  |
| 1_354 | Abir_nov_2015 | 19/04/2016 | 22,79529 | 89,07285 | 33,528 | 0,62 |
| 1_355 | Abir_nov_2015 | 19/04/2016 | 22,79535 | 89,07323 | 51,816 | 0,82 |
| 1_356 | Abir_nov_2015 | 19/04/2016 | 22,79489 | 89,07137 | 48,768 | 0,95 |
| 1_357 | Abir_nov_2015 | 19/04/2016 | 22,79486 | 89,07227 | 21,336 | 0,48 |
| 1_358 | Abir_nov_2015 | 19/04/2016 | 22,79707 | 89,07136 | 36,576 | 1,1  |
| 1_359 | Abir_nov_2015 | 19/04/2016 | 22,79718 | 89,07175 | 53,34  | 1,65 |
| 1_360 | Abir_nov_2015 | 19/04/2016 | 22,80072 | 89,07274 | 30,48  | 1,05 |
| 1_361 | Abir_nov_2015 | 19/04/2016 | 22,80176 | 89,06868 | 24,384 | 1,56 |



|       |               |            |          |          |         |       |
|-------|---------------|------------|----------|----------|---------|-------|
| 1_362 | Abir_nov_2015 | 19/04/2016 | 22,80211 | 89,06818 | 33,528  | 0,8   |
| 1_363 | Abir_nov_2015 | 19/04/2016 | 22,80001 | 89,06612 | 36,576  | 3,2   |
| 1_364 | Abir_nov_2015 | 19/04/2016 | 22,80034 | 89,04444 | 47,244  | 1,07  |
| 1_365 | Abir_nov_2015 | 19/04/2016 | 22,80056 | 89,05748 | 51,816  | 1,44  |
| 1_366 | Abir_nov_2015 | 19/04/2016 | 22,79873 | 89,06958 | 36,576  | 1,05  |
| 1_367 | Abir_nov_2015 | 19/04/2016 | 22,79596 | 89,06934 | 48,768  | 1,27  |
| 1_368 | Abir_nov_2015 | 19/04/2016 | 22,78736 | 89,06806 | 24,384  | 1,05  |
| 1_369 | Abir_nov_2015 | 19/04/2016 | 22,78666 | 89,0677  | 30,48   | 1,34  |
| 1_370 | Abir_nov_2015 | 19/04/2016 | 22,77978 | 89,08119 | 28,956  | 1,25  |
| 1_371 | Abir_nov_2015 | 19/04/2016 | 22,78065 | 89,07998 | 24,384  | 1,33  |
| 1_372 | Abir_nov_2015 | 19/04/2016 | 22,78105 | 89,07861 | 54,864  | 1,72  |
| 1_373 | Abir_nov_2015 | 19/04/2016 | 22,78208 | 89,07661 | 36,576  | 1,46  |
| 1_374 | Abir_nov_2015 | 19/04/2016 | 22,78039 | 89,07315 | 51,816  | 0,93  |
| 1_375 | Abir_nov_2015 | 19/04/2016 | 22,78254 | 89,07414 | 45,72   | 2,02  |
| 1_376 | Abir_nov_2015 | 19/04/2016 | 22,78301 | 89,07122 | 48,768  | 2,2   |
| 1_377 | Abir_nov_2015 | 19/04/2016 | 22,78383 | 89,06901 | 36,576  | 1,354 |
| 1_378 | Abir_nov_2015 | 19/04/2016 | 22,78559 | 89,06586 | 30,48   | 1,2   |
| 1_379 | Abir_nov_2015 | 19/04/2016 | 22,78856 | 89,06523 | 35,052  | 1,22  |
| 1_380 | Abir_nov_2015 | 19/04/2016 | 22,79085 | 89,06585 | 45,72   | 1,07  |
| 1_381 | Abir_nov_2015 | 19/04/2016 | 22,79625 | 89,06567 | 38,1    | 0,85  |
| 1_382 | Abir_nov_2015 | 19/04/2016 | 22,79582 | 89,06657 | 32,004  | 1     |
| 1_383 | Abir_nov_2015 | 19/04/2016 | 22,7963  | 89,06726 | 51,816  | 0,76  |
| 1_384 | Abir_nov_2015 | 19/04/2016 | 22,79648 | 89,06775 | 38,1    | 0,8   |
| 1_385 | Abir_nov_2015 | 19/04/2016 | 22,79818 | 89,0678  | 28,956  | 0,78  |
| 1_386 | Abir_nov_2015 | 19/04/2016 | 22,79814 | 89,06757 | 51,816  | 0,76  |
| 1_387 | Abir_nov_2015 | 19/04/2016 | 22,79864 | 89,06676 | 16,764  | 1,34  |
| 1_388 | Abir_nov_2015 | 19/04/2016 | 22,79854 | 89,06665 | 32,004  | 0,9   |
| 1_389 | Abir_nov_2015 | 19/04/2016 | 22,79761 | 89,06548 | 36,576  | 0,85  |
| 1_390 | Abir_nov_2015 | 19/04/2016 | 22,79751 | 89,06447 | 45,72   | 0,8   |
| 1_391 | Abir_nov_2015 | 19/04/2016 | 22,79921 | 89,05746 | 28,956  | 0,85  |
| 1_392 | Abir_nov_2015 | 19/04/2016 | 22,79855 | 89,0549  | 45,72   | 0,67  |
| 1_393 | Abir_nov_2015 | 19/04/2016 | 22,79931 | 89,05594 | 28,956  | 0,92  |
| 1_394 | Abir_nov_2015 | 19/04/2016 | 22,79941 | 89,05479 | 36,576  | 0,77  |
| 1_395 | Abir_nov_2015 | 19/04/2016 | 22,79821 | 89,05054 | 38,1    | 0,79  |
| 1_396 | Abir_nov_2015 | 19/04/2016 | 22,79863 | 89,04945 | 41,148  | 0,79  |
| 1_397 | Abir_nov_2015 | 19/04/2016 | 22,79718 | 89,05124 | 35,052  | 0,77  |
| 1_398 | Abir_nov_2015 | 19/04/2016 | 22,79572 | 89,05928 | 32,004  | 0,59  |
| 1_399 | Abir_nov_2015 | 19/04/2016 | 22,79792 | 89,05877 | 27,432  | 0,79  |
| 1_400 | Abir_nov_2015 | 19/04/2016 | 22,79887 | 89,06381 | 50,292  | 0,85  |
| 1_401 | Abir_nov_2015 | 20/04/2016 | 22,7729  | 89,08797 | 33,528  | 2,92  |
| 1_402 | Abir_nov_2015 | 20/04/2016 | 22,77102 | 89,08599 | 36,576  | 1,54  |
| 1_403 | Abir_nov_2015 | 20/04/2016 | 22,76962 | 89,0831  | 36,576  | 1,72  |
| 1_404 | Abir_nov_2015 | 20/04/2016 | 22,76738 | 89,08262 | 45,72   | 1,51  |
| 1_405 | Abir_nov_2015 | 20/04/2016 | 22,76509 | 89,08341 | 39,624  | 1,75  |
| 1_406 | Abir_nov_2015 | 20/04/2016 | 22,76335 | 89,08526 | 20,7264 | 2,05  |
| 1_407 | Abir_nov_2015 | 20/04/2016 | 22,75341 | 89,08878 | 27,432  | 1,8   |
| 1_408 | Abir_nov_2015 | 20/04/2016 | 22,75311 | 89,09002 | 32,004  | 1,1   |

|       |               |            |          |          |         |      |
|-------|---------------|------------|----------|----------|---------|------|
| 1_409 | Abir_nov_2015 | 20/04/2016 | 22,73475 | 89,07382 | 36,576  | 0,96 |
| 1_410 | Abir_nov_2015 | 20/04/2016 | 22,73562 | 89,06976 | 28,956  | 1,05 |
| 1_411 | Abir_nov_2015 | 20/04/2016 | 22,74175 | 89,06966 | 36,576  | 1,01 |
| 1_412 | Abir_nov_2015 | 20/04/2016 | 22,74168 | 89,06814 | 45,72   | 1,1  |
| 1_413 | Abir_nov_2015 | 20/04/2016 | 22,74391 | 89,06846 | 33,528  | 1,06 |
| 1_414 | Abir_nov_2015 | 20/04/2016 | 22,74613 | 89,0688  | 28,956  | 0,78 |
| 1_415 | Abir_nov_2015 | 20/04/2016 | 22,74854 | 89,0683  | 36,576  | 0,81 |
| 1_416 | Abir_nov_2015 | 20/04/2016 | 22,75112 | 89,06934 | 45,72   | 0,96 |
| 1_417 | Abir_nov_2015 | 20/04/2016 | 22,75181 | 89,0699  | 36,576  | 1,32 |
| 1_418 | Abir_nov_2015 | 20/04/2016 | 22,75368 | 89,07125 | 54,864  | 0,81 |
| 1_419 | Abir_nov_2015 | 20/04/2016 | 22,75609 | 89,07216 | 47,5488 | 0,86 |
| 1_420 | Abir_nov_2015 | 20/04/2016 | 22,75181 | 89,0676  | 36,576  | 1,19 |
| 1_421 | Abir_nov_2015 | 20/04/2016 | 22,74896 | 89,06501 | 42,672  | 0,83 |
| 1_422 | Abir_nov_2015 | 20/04/2016 | 22,74746 | 89,06236 | 38,1    | 0,9  |
| 1_423 | Abir_nov_2015 | 20/04/2016 | 22,74348 | 89,06042 | 30,48   | 1,03 |
| 1_424 | Abir_nov_2015 | 20/04/2016 | 22,74595 | 89,05972 | 41,148  | 0,97 |
| 1_425 | Abir_nov_2015 | 20/04/2016 | 22,74998 | 89,06194 | 45,72   | 0,81 |
| 1_426 | Abir_nov_2015 | 20/04/2016 | 22,75287 | 89,06364 | 36,576  | 1    |
| 1_427 | Abir_nov_2015 | 20/04/2016 | 22,75487 | 89,06557 | 45,72   | 0,98 |
| 1_428 | Abir_nov_2015 | 20/04/2016 | 22,76177 | 89,0643  | 39,624  | 0,99 |
| 1_429 | Abir_nov_2015 | 21/04/2016 | 22,70171 | 89,06377 | 28,956  | 2,03 |
| 1_430 | Abir_nov_2015 | 21/04/2016 | 22,70105 | 89,06422 | 28,956  | 1,42 |
| 1_431 | Abir_nov_2015 | 21/04/2016 | 22,70131 | 89,06397 | 12,192  | 3,14 |
| 1_432 | Abir_nov_2015 | 21/04/2016 | 22,69415 | 89,02528 | 12,192  | 3,62 |
| 1_433 | Abir_nov_2015 | 21/04/2016 | 22,69333 | 89,02481 | 12,192  | 4,15 |
| 1_434 | Abir_nov_2015 | 21/04/2016 | 22,69348 | 89,02464 | 12,192  | 4,02 |
| 1_435 | Abir_nov_2015 | 21/04/2016 | 22,69372 | 89,02303 | 21,336  | 3,06 |
| 1_436 | Abir_nov_2015 | 21/04/2016 | 22,69607 | 89,01922 | 21,336  | 4,03 |
| 1_437 | Abir_nov_2015 | 21/04/2016 | 22,70327 | 89,01965 | 21,336  | 1,98 |
| 1_438 | Abir_nov_2015 | 21/04/2016 | 22,70734 | 89,02425 | 12,192  | 1,23 |
| 1_439 | Abir_nov_2015 | 21/04/2016 | 22,70707 | 89,03247 | 21,336  | 4,01 |
| 1_440 | Abir_nov_2015 | 23/04/2016 | 22,73338 | 89,05994 | 16,764  | 0,97 |
| 1_441 | Abir_nov_2015 | 23/04/2016 | 22,73375 | 89,05965 | 30,48   | 0,58 |
| 1_442 | Abir_nov_2015 | 23/04/2016 | 22,73359 | 89,05545 | 30,48   | 0,9  |
| 1_443 | Abir_nov_2015 | 23/04/2016 | 22,73381 | 89,05556 | 33,528  | 0,79 |
| 1_444 | Abir_nov_2015 | 23/04/2016 | 22,73436 | 89,05543 | 21,336  | 0,86 |
| 1_445 | Abir_nov_2015 | 23/04/2016 | 22,73675 | 89,05644 | 38,1    | 1,23 |
| 1_446 | Abir_nov_2015 | 23/04/2016 | 22,74711 | 89,0545  | 51,816  | 0,73 |
| 1_447 | Abir_nov_2015 | 23/04/2016 | 22,74636 | 89,05177 | 21,336  | 0,95 |
| 1_448 | Abir_nov_2015 | 23/04/2016 | 22,81398 | 89,03628 | 48,768  | 0,68 |
| 1_449 | Abir_nov_2015 | 23/04/2016 | 22,81413 | 89,03596 | 30,48   | 1,01 |
| 1_450 | Abir_nov_2015 | 23/04/2016 | 22,81429 | 89,03603 | 39,624  | 0,98 |
| 1_451 | Abir_nov_2015 | 23/04/2016 | 22,80017 | 89,02813 | 16,764  | 0,5  |
| 1_452 | Abir_nov_2015 | 24/04/2016 | 22,63783 | 89,12611 | 54,864  | 0,78 |
| 1_453 | Abir_nov_2015 | 24/04/2016 | 22,63779 | 89,12594 | 54,864  | 0,77 |
| 1_454 | Abir_nov_2015 | 24/04/2016 | 22,64667 | 89,12268 | 33,528  | 0,77 |
| 1_455 | Abir_nov_2015 | 24/04/2016 | 22,64688 | 89,1226  | 30,48   | 0,74 |

|       |               |            |          |          |         |      |
|-------|---------------|------------|----------|----------|---------|------|
| 1_456 | Abir_nov_2015 | 24/04/2016 | 22,64701 | 89,12285 | 30,48   | 0,69 |
| 1_457 | Abir_nov_2015 | 24/04/2016 | 22,64031 | 89,12288 | 22,86   | 0,99 |
| 1_458 | Abir_nov_2015 | 24/04/2016 | 22,63993 | 89,12316 | 21,336  | 1,21 |
| 1_459 | Abir_nov_2015 | 24/04/2016 | 22,63076 | 89,12322 | 21,336  | 1,13 |
| 1_460 | Abir_nov_2015 | 24/04/2016 | 22,63965 | 89,12307 | 21,336  | 0,82 |
| 1_461 | Abir_nov_2015 | 24/04/2016 | 22,63984 | 89,12299 | 21,336  | 1,12 |
| 1_462 | Abir_nov_2015 | 24/04/2016 | 22,64024 | 89,12183 | 21,336  | 1,05 |
| 1_463 | Abir_nov_2015 | 24/04/2016 | 22,635   | 89,12711 | 21,336  | 0,99 |
| 1_464 | Abir_nov_2015 | 24/04/2016 | 22,64117 | 89,12644 | 30,48   | 1,02 |
| 1_465 | Abir_nov_2015 | 24/04/2016 | 22,64131 | 89,12672 | 21,336  | 1,24 |
| 1_466 | Abir_nov_2015 | 24/04/2016 | 22,64135 | 89,12701 | 15,24   | 0,91 |
| 1_467 | Abir_nov_2015 | 24/04/2016 | 22,64083 | 89,12509 | 24,384  | 0,8  |
| 1_468 | Abir_nov_2015 | 24/04/2016 | 22,64105 | 89,12315 | 30,48   | 0,93 |
| 1_469 | Abir_nov_2015 | 26/05/2016 | 22,60062 | 89,51995 | 6,096   | 1,04 |
| 1_470 | Atik_P33      |            | 22,57491 | 89,49838 | 27,432  | 5,04 |
| 1_471 | Atik_P33      |            | 22,58139 | 89,51022 | 18,288  | 6,9  |
| 1_472 | Atik_P33      |            | 22,58666 | 89,51022 | 10,668  | 7,5  |
| 1_473 | Atik_P33      |            | 22,57899 | 89,49419 | 36,576  | 5,7  |
| 1_474 | Atik_P33      |            | 22,58245 | 89,495   | 39,624  | 5,71 |
| 1_475 | Atik_P33      |            | 22,57538 | 89,47495 | 39,624  | 5,87 |
| 1_476 | Atik_P33      |            | 22,59595 | 89,48351 | 42,672  | 5,65 |
| 1_477 | Atik_P33      |            | 22,59297 | 89,51065 | 45,72   | 6,29 |
| 1_478 | Atik_P33      |            | 22,62881 | 89,51284 | 16,764  | 5,09 |
| 1_479 | Atik_P33      |            | 22,5203  | 89,4912  | 19,812  | 8,03 |
| 1_480 | Atik_P33      |            | 22,49905 | 89,47944 | 45,72   | 4,92 |
| 1_481 | Atik_P33      |            | 22,51045 | 89,49091 | 16,764  | 7,87 |
| 1_482 | Atik_P33      |            | 22,5323  | 89,46503 | 35,6616 | 3,94 |
| 1_483 | Atik_P33      |            | 22,5662  | 89,50529 | 36,576  | 4,7  |
| 1_484 | Atik_P33      |            | 22,53522 | 89,4893  | 29,5656 | 5,5  |
| 1_485 | Atik_P33      |            | 22,50462 | 89,52175 | 18,288  | 8,76 |
| 1_486 | Atik_P33      |            | 22,52158 | 89,57334 | 13,716  | 4,06 |
| 1_487 | Atik_P33      |            | 22,48817 | 89,57917 | 12,192  | 5,42 |
| 1_488 | Atik_P33      |            | 22,45837 | 89,58231 | 18,288  | 6,51 |
| 1_489 | Atik_P22      | 26/10/2014 | 22,6355  | 89,4313  | 50,292  | 6,03 |
| 1_490 | Atik_P22      | 26/10/2014 | 22,6354  | 89,4312  | 36,576  | 6,03 |
| 1_491 | Atik_P22      | 26/10/2014 | 22,6364  | 89,4303  | 36,576  | 4,89 |
| 1_492 | Atik_P22      | 26/10/2014 | 22,6364  | 89,4298  | 21,336  | 6,53 |
| 1_493 | Atik_P22      | 26/10/2014 | 22,6412  | 89,4292  | 53,34   | 5,24 |
| 1_494 | Atik_P22      | 26/10/2014 | 22,6413  | 89,4327  | 24,384  | 6,03 |
| 1_495 | Atik_P22      | 26/10/2014 | 22,6402  | 89,4332  | 45,72   | 5,84 |
| 1_496 | Atik_P22      | 26/10/2014 | 22,6411  | 89,4241  | 21,336  | 8,2  |
| 1_497 | Atik_P22      | 26/10/2014 | 22,6386  | 89,4267  | 21,336  | 5,14 |
| 1_498 | Atik_P22      | 26/10/2014 | 22,6411  | 89,4227  | 33,528  | 5,02 |
| 1_499 | Atik_P22      | 26/10/2014 | 22,6419  | 89,4366  | 42,672  | 4,52 |
| 1_500 | Atik_P22      | 26/10/2014 | 22,6425  | 89,4353  | 24,384  | 7,11 |
| 1_501 | Atik_P22      | 27/10/2014 | 22,63933 | 89,4417  | 36,576  | 8,36 |
| 1_502 | Atik_P22      | 27/10/2014 | 22,6387  | 89,4426  | 38,1    | 5,6  |

|       |          |            |         |         |         |       |
|-------|----------|------------|---------|---------|---------|-------|
| 1_503 | Atik_P22 | 27/10/2014 | 22,639  | 89,4432 | 25,908  | 5,6   |
| 1_504 | Atik_P22 | 27/10/2014 | 22,6362 | 89,4481 | 42,672  | 6,88  |
| 1_505 | Atik_P22 | 28/10/2014 | 22,6337 | 89,4343 | 30,48   | 5,49  |
| 1_506 | Atik_P22 | 28/10/2014 | 22,6334 | 89,434  | 24,384  | 7,39  |
| 1_507 | Atik_P22 | 28/10/2014 | 22,6328 | 89,4346 | 45,72   | 6,14  |
| 1_508 | Atik_P22 | 28/10/2014 | 22,631  | 89,4368 | 32,004  | 6,37  |
| 1_509 | Atik_P22 | 28/10/2014 | 22,6222 | 89,4328 | 39,624  | 4,78  |
| 1_510 | Atik_P22 | 28/10/2014 | 22,6222 | 89,4326 | 45,72   | 4,94  |
| 1_511 | Atik_P22 | 29/10/2014 | 22,6281 | 89,4405 | 24,384  | 7,01  |
| 1_512 | Atik_P22 | 29/10/2014 | 22,6271 | 89,4424 | 20,4216 | 6,13  |
| 1_513 | Atik_P22 | 29/10/2014 | 22,6302 | 89,4215 | 33,528  | 6,12  |
| 1_514 | Atik_P22 | 29/10/2014 | 22,6277 | 89,4225 | 39,624  | 5,96  |
| 1_515 | Atik_P22 | 29/10/2014 | 22,6275 | 89,4225 | 36,576  | 7,61  |
| 1_516 | Atik_P22 | 29/10/2014 | 22,6273 | 89,423  | 36,576  | 8,73  |
| 1_517 | Atik_P22 | 29/10/2014 | 22,6271 | 89,4235 | 42,672  | 4,53  |
| 1_518 | Atik_P22 | 29/10/2014 | 22,6272 | 89,4233 | 41,148  | 5,25  |
| 1_519 | Atik_P22 | 29/10/2014 | 22,6272 | 89,4232 | 39,624  | 5,63  |
| 1_520 | Atik_P22 | 29/10/2014 | 22,6249 | 89,4241 | 35,052  | 5,43  |
| 1_521 | Atik_P22 | 29/10/2014 | 22,628  | 89,4255 | 36,576  | 5,5   |
| 1_522 | Atik_P22 | 30/10/2014 | 22,6164 | 89,4451 | 21,336  | 15,18 |
| 1_523 | Atik_P22 | 30/10/2014 | 22,6159 | 89,4435 | 48,768  | 8,01  |
| 1_524 | Atik_P22 | 30/10/2014 | 22,6164 | 89,4425 | 18,288  | 9,05  |
| 1_525 | Atik_P22 | 30/10/2014 | 22,6166 | 89,4425 | 48,768  | 7,03  |
| 1_526 | Atik_P22 | 30/10/2014 | 22,6177 | 89,441  | 9,144   | 6,79  |
| 1_527 | Atik_P22 | 30/10/2014 | 22,6198 | 89,4404 | 33,528  | 5,27  |
| 1_528 | Atik_P22 | 30/10/2014 | 22,6189 | 89,4381 | 36,576  | 9,61  |
| 1_529 | Atik_P22 | 30/10/2014 | 22,6145 | 89,4384 | 33,528  | 4,68  |
| 1_530 | Atik_P22 | 30/10/2014 | 22,6142 | 89,4386 | 33,528  | 4,24  |
| 1_531 | Atik_P22 | 30/10/2014 | 22,6135 | 89,4393 | 36,576  | 6,05  |
| 1_532 | Atik_P22 | 30/10/2014 | 22,6132 | 89,4392 | 39,624  | 4,53  |
| 1_533 | Atik_P22 | 30/10/2014 | 22,6128 | 89,4394 | 36,576  | 4,06  |
| 1_534 | Atik_P22 | 30/10/2014 | 22,6131 | 89,4395 | 33,528  | 4,04  |
| 1_535 | Atik_P22 | 30/10/2014 | 22,6138 | 89,4399 | 41,148  | 6,57  |
| 1_536 | Atik_P22 | 30/10/2014 | 22,6188 | 89,4254 | 41,148  | 3,35  |
| 1_537 | Atik_P22 | 30/10/2014 | 22,6189 | 89,4245 | 42,672  | 2,72  |
| 1_538 | Atik_P22 | 30/10/2014 | 22,6183 | 89,4252 | 42,672  | 3,16  |
| 1_539 | Atik_P22 | 30/10/2014 | 22,6185 | 89,4241 | 44,196  | 3,39  |
| 1_540 | Atik_P22 | 30/10/2014 | 22,6185 | 89,4247 | 44,196  | 2,47  |
| 1_541 | Atik_P22 | 30/10/2014 | 22,618  | 89,423  | 39,624  | 2,66  |
| 1_542 | Atik_P22 | 30/10/2014 | 22,6174 | 89,4237 | 44,196  | 3,6   |
| 1_543 | Atik_P22 | 30/10/2014 | 22,6169 | 89,4225 | 41,148  | 3,35  |
| 1_544 | Atik_P22 | 30/10/2014 | 22,6169 | 89,4225 | 45,72   | 3,35  |
| 1_545 | Atik_P22 | 30/10/2014 | 22,6167 | 89,4228 | 38,1    | 3,46  |
| 1_546 | Atik_P22 | 30/10/2014 | 22,6169 | 89,4218 | 45,72   | 3,26  |
| 1_547 | Atik_P22 | 30/10/2014 | 22,6161 | 89,4199 | 45,72   | 5,48  |
| 1_548 | Atik_P22 | 30/10/2014 | 22,6155 | 89,421  | 42,672  | 4,06  |
| 1_549 | Atik_P22 | 30/10/2014 | 22,6159 | 89,4205 | 47,244  | 4,74  |

|       |          |            |         |         |         |      |
|-------|----------|------------|---------|---------|---------|------|
| 1_550 | Atik_P22 | 30/10/2014 | 22,6148 | 89,4204 | 48,768  | 5,44 |
| 1_551 | Atik_P22 | 30/10/2014 | 22,6148 | 89,4219 | 47,244  | 1,2  |
| 1_552 | Atik_P22 | 30/10/2014 | 22,6096 | 89,4172 | 36,576  | 7,85 |
| 1_553 | Atik_P22 | 30/10/2014 | 22,6054 | 89,4277 | 41,148  | 3,51 |
| 1_554 | Atik_P22 | 30/10/2014 | 22,6054 | 89,427  | 42,672  | 3,62 |
| 1_555 | Atik_P22 | 30/10/2014 | 22,6051 | 89,4269 | 47,244  | 3,89 |
| 1_556 | Atik_P22 | 30/10/2014 | 22,6042 | 89,4273 | 48,768  | 2,61 |
| 1_557 | Atik_P22 | 30/10/2014 | 22,6045 | 89,4269 | 48,768  | 2,77 |
| 1_558 | Atik_P22 | 30/10/2014 | 22,6051 | 89,426  | 35,052  | 3,37 |
| 1_559 | Atik_P22 | 30/10/2014 | 22,6048 | 89,4257 | 42,672  | 5,31 |
| 1_560 | Atik_P22 | 30/10/2014 | 22,6047 | 89,4262 | 36,576  | 3,25 |
| 1_561 | Atik_P22 | 30/10/2014 | 22,6045 | 89,4264 | 36,576  | 3,12 |
| 1_562 | Atik_P22 | 30/10/2014 | 22,6039 | 89,4264 | 36,576  | 2,37 |
| 1_563 | Atik_P22 | 31/10/2014 | 22,6188 | 89,4343 | 42,672  | 5,14 |
| 1_564 | Atik_P22 | 31/10/2014 | 22,6018 | 89,4306 | 36,576  | 3,44 |
| 1_565 | Atik_P22 | 31/10/2014 | 22,5971 | 89,4241 | 36,576  | 6,13 |
| 1_566 | Atik_P22 | 31/10/2014 | 22,5968 | 89,4241 | 39,624  | 6,01 |
| 1_567 | Atik_P22 | 31/10/2014 | 22,596  | 89,4212 | 48,768  | 6,8  |
| 1_568 | Atik_P22 | 31/10/2014 | 22,5889 | 89,4143 | 36,576  | 5,58 |
| 1_569 | Atik_P22 | 31/10/2014 | 22,6203 | 89,4315 | 44,196  | 2,83 |
| 1_570 | Atik_P22 | 31/10/2014 | 22,6184 | 89,4312 | 39,624  | 2,01 |
| 1_571 | Atik_P22 | 31/10/2014 | 22,6191 | 89,4316 | 36,576  | 1,95 |
| 1_572 | Atik_P22 | 31/10/2014 | 22,6164 | 89,4332 | 35,052  | 1,79 |
| 1_573 | Atik_P22 | 31/10/2014 | 22,6155 | 89,4352 | 45,72   | 2,06 |
| 1_574 | Atik_P22 | 31/10/2014 | 22,6145 | 89,4339 | 54,864  | 2,29 |
| 1_575 | Atik_P22 | 31/10/2014 | 22,6122 | 89,4326 | 39,624  | 1,8  |
| 1_576 | Atik_P22 | 31/10/2014 | 22,6097 | 89,4315 | 35,052  | 2,14 |
| 1_577 | Atik_P22 | 31/10/2014 | 22,6082 | 89,4308 | 36,576  | 1,1  |
| 1_578 | Atik_P22 | 31/10/2014 | 22,6089 | 89,4293 | 41,148  | 1,61 |
| 1_579 | Atik_P22 | 31/10/2014 | 22,6083 | 89,4291 | 36,576  | 1,18 |
| 1_580 | Atik_P22 | 31/10/2014 | 22,6076 | 89,4287 | 44,196  | 1,77 |
| 1_581 | Atik_P22 | 31/10/2014 | 22,6068 | 89,4272 | 50,292  | 2    |
| 1_582 | Atik_P22 | 31/10/2014 | 22,6069 | 89,4267 | 50,292  | 2,42 |
| 1_583 | Atik_P22 | 31/10/2014 | 22,604  | 89,4219 | 44,196  | 3,54 |
| 1_584 | Atik_P22 | 31/10/2014 | 22,6043 | 89,4221 | 41,148  | 3,54 |
| 1_585 | Atik_P22 | 31/10/2014 | 22,6042 | 89,4222 | 39,624  | 3,55 |
| 1_586 | Atik_P22 | 31/10/2014 | 22,6061 | 89,4265 | 48,768  | 2,88 |
| 1_587 | Atik_P22 | 31/10/2014 | 22,606  | 89,4266 | 36,576  | 3,03 |
| 1_588 | Atik_P22 | 31/10/2014 | 22,6062 | 89,4267 | 36,576  | 2,53 |
| 1_589 | Atik_P22 | 31/10/2014 | 22,6067 | 89,4278 | 51,816  | 2,17 |
| 1_590 | Atik_P22 | 31/10/2014 | 22,6065 | 89,4282 | 44,196  | 2,14 |
| 1_591 | Atik_P22 | 11/01/2014 | 22,5884 | 89,4098 | 36,576  | 4,2  |
| 1_592 | Atik_P22 | 11/01/2014 | 22,5883 | 89,4106 | 39,624  | 3,88 |
| 1_593 | Atik_P22 | 11/01/2014 | 22,5942 | 89,4138 | 39,624  | 8,45 |
| 1_594 | Atik_P22 | 11/01/2014 | 22,5937 | 89,4142 | 38,1    | 8,44 |
| 1_595 | Atik_P22 | 11/01/2014 | 22,5943 | 89,4144 | 40,2336 | 9,09 |
| 1_596 | Atik_P22 | 11/01/2014 | 22,5938 | 89,4154 | 54,864  | 8,59 |

|       |              |            |          |          |         |      |
|-------|--------------|------------|----------|----------|---------|------|
| 1_597 | Atik_P22     | 11/01/2014 | 22,5931  | 89,4155  | 45,72   | 8,37 |
| 1_598 | Atik_P22     | 11/01/2014 | 22,5945  | 89,4134  | 39,624  | 3,79 |
| 1_599 | Atik_P22     | 11/01/2014 | 22,5957  | 89,4106  | 36,576  | 3,95 |
| 1_600 | Atik_Nov2016 | 16/11/2016 | 22,65183 | 89,44051 | 36,576  | 4,8  |
| 1_601 | Atik_Nov2016 | 16/11/2016 | 22,65583 | 89,45849 | 57,912  | 3,46 |
| 1_602 | Atik_Nov2016 | 16/11/2016 | 22,65792 | 89,46012 | 48,768  | 3,79 |
| 1_603 | Atik_Nov2016 | 16/11/2016 | 22,66183 | 89,461   | 27,432  | 0,34 |
| 1_604 | Atik_Nov2016 | 16/11/2016 | 22,67892 | 89,50025 | 12,192  | 2    |
| 1_605 | Atik_Nov2016 | 16/11/2016 | 22,67944 | 89,50354 | 9,7536  | 1,71 |
| 1_606 | Atik_Nov2016 | 16/11/2016 | 22,67964 | 89,50503 | 13,716  | 1,81 |
| 1_607 | Atik_Nov2016 | 16/11/2016 | 22,63872 | 89,44231 | 42,672  | 8,32 |
| 1_608 | Atik_Nov2016 | 16/11/2016 | 22,6214  | 89,438   | 30,48   | 3,28 |
| 1_609 | Atik_Nov2016 | 16/11/2016 | 22,62186 | 89,43693 | 30,48   | 6,34 |
| 1_610 | Atik_Nov2016 | 16/11/2016 | 22,62207 | 89,43311 | 39,624  | 4,95 |
| 1_611 | Atik_Nov2016 | 16/11/2016 | 22,62217 | 89,43264 | 24,384  | 5,05 |
| 1_612 | Atik_Nov2016 | 16/11/2016 | 22,6183  | 89,43109 | 28,956  | 3,12 |
| 1_613 | Atik_Nov2016 | 16/11/2016 | 22,61557 | 89,43516 | 36,576  | 4,32 |
| 1_614 | Atik_Nov2016 | 16/11/2016 | 22,61405 | 89,43407 | 18,288  | 3,78 |
| 1_615 | Atik_Nov2016 | 16/11/2016 | 22,6121  | 89,4327  | 39,624  | 4,13 |
| 1_616 | Atik_Nov2016 | 16/11/2016 | 22,61119 | 89,43201 | 42,672  | 4,35 |
| 1_617 | Atik_Nov2016 | 16/11/2016 | 22,61119 | 89,43181 | 51,816  | 3,64 |
| 1_618 | Atik_Nov2016 | 16/11/2016 | 22,60964 | 89,43156 | 44,196  | 1,29 |
| 1_619 | Atik_Nov2016 | 16/11/2016 | 22,60769 | 89,43067 | 36,576  | 1,24 |
| 1_620 | Atik_Nov2016 | 16/11/2016 | 22,6077  | 89,42911 | 36,576  | 1,37 |
| 1_621 | Atik_Nov2016 | 16/11/2016 | 22,60415 | 89,42229 | 39,624  | 8,1  |
| 1_622 | Atik_Nov2016 | 16/11/2016 | 22,59571 | 89,41011 | 48,768  | 9,34 |
| 1_623 | Atik_Nov2016 | 16/11/2016 | 22,59422 | 89,41162 | 45,72   | 8,76 |
| 1_624 | Atik_Nov2016 | 16/11/2016 | 22,5932  | 89,4139  | 48,768  | 8,76 |
| 1_625 | Atik_Nov2016 | 17/11/2016 | 22,56755 | 89,47894 | 21,336  | 6,25 |
| 1_626 | Atik_Nov2016 | 17/11/2016 | 22,56793 | 89,48032 | 21,336  | 7,02 |
| 1_627 | Atik_Nov2016 | 17/11/2016 | 22,56023 | 89,47514 | 36,576  | 7,38 |
| 1_628 | Atik_Nov2016 | 17/11/2016 | 22,55933 | 89,47529 | 30,48   | 6,33 |
| 1_629 | Atik_Nov2016 | 17/11/2016 | 22,54578 | 89,47119 | 45,72   | 7,65 |
| 1_630 | Atik_Nov2016 | 17/11/2016 | 22,546   | 89,47063 | 18,288  | 8,12 |
| 1_631 | Atik_Nov2016 | 17/11/2016 | 22,53707 | 89,47472 | 36,576  | 4,68 |
| 1_632 | Atik_Nov2016 | 17/11/2016 | 22,53246 | 89,46507 | 38,1    | 2,12 |
| 1_633 | Atik_Nov2016 | 17/11/2016 | 22,53233 | 89,46585 | 36,576  | 2,24 |
| 1_634 | Atik_Nov2016 | 17/11/2016 | 22,53235 | 89,46627 | 36,576  | 1,85 |
| 1_635 | Atik_Nov2016 | 17/11/2016 | 22,53234 | 89,46655 | 38,1    | 2,2  |
| 1_636 | Atik_Nov2016 | 17/11/2016 | 22,53115 | 89,46855 | 35,052  | 1,7  |
| 1_637 | Atik_Nov2016 | 17/11/2016 | 22,53095 | 89,46861 | 32,004  | 1,65 |
| 1_638 | Atik_Nov2016 | 17/11/2016 | 22,53113 | 89,46886 | 39,3192 | 1,9  |
| 1_639 | Atik_Nov2016 | 17/11/2016 | 22,53083 | 89,47037 | 45,72   | 2,63 |
| 1_640 | Atik_Nov2016 | 17/11/2016 | 22,53083 | 89,47015 | 41,148  | 2,61 |
| 1_641 | Atik_Nov2016 | 17/11/2016 | 22,52774 | 89,47373 | 45,72   | 2,66 |
| 1_642 | Atik_Nov2016 | 17/11/2016 | 22,52742 | 89,47393 | 51,816  | 2,85 |
| 1_643 | Atik_Nov2016 | 17/11/2016 | 22,52655 | 89,4744  | 32,6136 | 2,92 |

|       |              |            |          |          |         |      |
|-------|--------------|------------|----------|----------|---------|------|
| 1_644 | Atik_Nov2016 | 17/11/2016 | 22,51934 | 89,46492 | 50,292  | 2,83 |
| 1_645 | Atik_Nov2016 | 17/11/2016 | 22,51952 | 89,46291 | 19,812  | 2,78 |
| 1_646 | Atik_Nov2016 | 17/11/2016 | 22,42734 | 89,45042 | 24,384  | 5,72 |
| 1_647 | Atik_Nov2016 | 17/11/2016 | 22,42783 | 89,45026 | 27,432  | 6,74 |
| 1_648 | Atik_Nov2016 | 17/11/2016 | 22,43314 | 89,45175 | 36,576  | 4,73 |
| 1_649 | Atik_Nov2016 | 17/11/2016 | 22,43618 | 89,44778 | 33,528  | 4,98 |
| 1_650 | Atik_Nov2016 | 17/11/2016 | 22,44707 | 89,4457  | 36,576  | 5,12 |
| 1_651 | Atik_Nov2016 | 17/11/2016 | 22,44728 | 89,4454  | 24,384  | 7,69 |
| 1_652 | Atik_Nov2016 | 17/11/2016 | 22,45703 | 89,44667 | 39,624  | 4,61 |
| 1_653 | Atik_Nov2016 | 17/11/2016 | 22,45763 | 89,44662 | 36,576  | 4,41 |
| 1_654 | Atik_Nov2016 | 17/11/2016 | 22,45807 | 89,44668 | 41,148  | 4,64 |
| 1_655 | Atik_Nov2016 | 17/11/2016 | 22,45831 | 89,44653 | 39,624  | 4,64 |
| 1_656 | Atik_Nov2016 | 17/11/2016 | 22,45304 | 89,45554 | 39,624  | 5,47 |
| 1_657 | Atik_Nov2016 | 17/11/2016 | 22,47024 | 89,45887 | 39,624  | 3,44 |
| 1_658 | Atik_Nov2016 | 17/11/2016 | 22,47032 | 89,45932 | 36,576  | 4,16 |
| 1_659 | Atik_Nov2016 | 17/11/2016 | 22,47991 | 89,46797 | 19,812  | 7,8  |
| 1_660 | Atik_Nov2016 | 17/11/2016 | 22,48851 | 89,46761 | 30,48   | 3,72 |
| 1_661 | Atik_Nov2016 | 17/11/2016 | 22,48857 | 89,46711 | 31,3944 | 3,68 |
| 1_662 | Atik_Nov2016 | 17/11/2016 | 22,50174 | 89,46838 | 45,72   | 3,95 |
| 1_663 | Atik_Nov2016 | 17/11/2016 | 22,50231 | 89,46879 | 32,004  | 3,14 |
| 1_664 | Atik_Nov2016 | 17/11/2016 | 22,50277 | 89,4693  | 36,576  | 3,44 |
| 1_665 | Atik_Nov2016 | 18/11/2016 | 22,67668 | 89,64869 | 22,86   | 1,35 |
| 1_666 | Atik_Nov2016 | 18/11/2016 | 22,67671 | 89,64882 | 18,288  | 1,27 |
| 1_667 | Atik_Nov2016 | 18/11/2016 | 22,67663 | 89,64896 | 22,86   | 1,03 |
| 1_668 | Atik_Nov2016 | 18/11/2016 | 22,67661 | 89,64905 | 22,86   | 1,05 |
| 1_669 | Atik_Nov2016 | 18/11/2016 | 22,67629 | 89,64854 | 21,336  | 0,95 |
| 1_670 | Atik_Nov2016 | 18/11/2016 | 22,66717 | 89,64749 | 30,48   | 1,48 |
| 1_671 | Atik_Nov2016 | 18/11/2016 | 22,65831 | 89,64151 | 18,288  | 2    |
| 1_672 | Atik_Nov2016 | 18/11/2016 | 22,65864 | 89,64153 | 15,24   | 2,4  |
| 1_673 | Atik_Nov2016 | 18/11/2016 | 22,65918 | 89,64163 | 27,432  | 2,54 |
| 1_674 | Atik_Nov2016 | 18/11/2016 | 22,65088 | 89,64252 | 30,48   | 1,99 |
| 1_675 | Atik_Nov2016 | 18/11/2016 | 22,65052 | 89,64295 | 16,1544 | 2,11 |
| 1_676 | Atik_Nov2016 | 18/11/2016 | 22,63621 | 89,64185 | 21,336  | 3,51 |
| 1_677 | Atik_Nov2016 | 18/11/2016 | 22,6363  | 89,64189 | 21,336  | 4,74 |
| 1_678 | Atik_Nov2016 | 18/11/2016 | 22,63646 | 89,64186 | 18,288  | 4,31 |
| 1_679 | Atik_Nov2016 | 18/11/2016 | 22,61124 | 89,64256 | 12,192  | 8,9  |
| 1_680 | Atik_Nov2016 | 18/11/2016 | 22,61158 | 89,61409 | 19,812  | 1,71 |
| 1_681 | Atik_Nov2016 | 18/11/2016 | 22,59321 | 89,61617 | 21,336  | 15   |
| 1_682 | Atik_Nov2016 | 18/11/2016 | 22,58451 | 89,62721 | 18,288  | 4,41 |
| 1_683 | Atik_Nov2016 | 19/11/2016 | 22,55663 | 89,59394 | 18,288  | 7,23 |
| 1_684 | Atik_Nov2016 | 19/11/2016 | 22,54799 | 89,61063 | 12,192  | 5,89 |
| 1_685 | Atik_Nov2016 | 19/11/2016 | 22,54822 | 89,61073 | 21,336  | 5,82 |
| 1_686 | Atik_Nov2016 | 19/11/2016 | 22,54487 | 89,60216 | 13,716  | 8,17 |
| 1_687 | Atik_Nov2016 | 19/11/2016 | 22,53964 | 89,60156 | 12,192  | 6,04 |
| 1_688 | Atik_Nov2016 | 20/11/2016 | 22,63496 | 89,50194 | 21,336  | 2,59 |
| 1_689 | Atik_Nov2016 | 20/11/2016 | 22,63454 | 89,50158 | 13,716  | 3,78 |
| 1_690 | Atik_Nov2016 | 20/11/2016 | 22,63446 | 89,50098 | 18,288  | 3,05 |

|       |              |            |          |          |        |       |
|-------|--------------|------------|----------|----------|--------|-------|
| 1_691 | Atik_Nov2016 | 20/11/2016 | 22,63449 | 89,50081 | 18,288 | 2,99  |
| 1_692 | Atik_Nov2016 | 20/11/2016 | 22,63317 | 89,5007  | 18,288 | 4,82  |
| 1_693 | Atik_Nov2016 | 20/11/2016 | 22,63262 | 89,50056 | 21,336 | 4,11  |
| 1_694 | Atik_Nov2016 | 20/11/2016 | 22,63329 | 89,50035 | 21,336 | 3,83  |
| 1_695 | Atik_Nov2016 | 20/11/2016 | 22,63174 | 89,50008 | 21,336 | 3,63  |
| 1_696 | Atik_Nov2016 | 20/11/2016 | 22,63159 | 89,49979 | 21,336 | 4,2   |
| 1_697 | Atik_Nov2016 | 20/11/2016 | 22,63263 | 89,50012 | 18,288 | 6,01  |
| 1_698 | Atik_Nov2016 | 20/11/2016 | 22,6326  | 89,49982 | 18,288 | 3,97  |
| 1_699 | Atik_Nov2016 | 20/11/2016 | 22,63158 | 89,49937 | 18,288 | 4,9   |
| 1_700 | Atik_Nov2016 | 20/11/2016 | 22,63122 | 89,49897 | 18,288 | 4,05  |
| 1_701 | Atik_Nov2016 | 20/11/2016 | 22,63183 | 89,49723 | 18,288 | 3,6   |
| 1_702 | Atik_Nov2016 | 20/11/2016 | 22,6288  | 89,49835 | 18,288 | 4,53  |
| 1_703 | Atik_Nov2016 | 20/11/2016 | 22,62667 | 89,49818 | 15,24  | 4,68  |
| 1_704 | Atik_Nov2016 | 20/11/2016 | 22,6231  | 89,49628 | 45,72  | 3,64  |
| 1_705 | Atik_Nov2016 | 20/11/2016 | 22,61852 | 89,49294 | 45,72  | 4,22  |
| 1_706 | Atik_Nov2016 | 20/11/2016 | 22,61739 | 89,4919  | 45,72  | 5,25  |
| 1_707 | Atik_Nov2016 | 20/11/2016 | 22,61684 | 89,49236 | 30,48  | 4,5   |
| 1_708 | Atik_Nov2016 | 20/11/2016 | 22,61688 | 89,49252 | 30,48  | 4,48  |
| 1_709 | Atik_Nov2016 | 20/11/2016 | 22,61572 | 89,4933  | 36,576 | 3,39  |
| 1_710 | Atik_Nov2016 | 20/11/2016 | 22,61524 | 89,49375 | 42,672 | 3,35  |
| 1_711 | Atik_Nov2016 | 20/11/2016 | 22,6146  | 89,49352 | 42,672 | 3,6   |
| 1_712 | Atik_Nov2016 | 20/11/2016 | 22,6132  | 89,49368 | 38,1   | 3,97  |
| 1_713 | Atik_Nov2016 | 20/11/2016 | 22,61254 | 89,4946  | 39,624 | 3,21  |
| 1_714 | Atik_Nov2016 | 20/11/2016 | 22,60978 | 89,49582 | 56,388 | 4,17  |
| 1_715 | Atik_Nov2016 | 20/11/2016 | 22,60153 | 89,49292 | 51,816 | 4,23  |
| 1_716 | Atik_Nov2016 | 20/11/2016 | 22,60057 | 89,49308 | 30,48  | 7,79  |
| 1_717 | Atik_Nov2016 | 20/11/2016 | 22,59986 | 89,49289 | 45,72  | 4,06  |
| 1_718 | Atik_Nov2016 | 20/11/2016 | 22,60005 | 89,49307 | 51,816 | 4,44  |
| 1_719 | Atik_Nov2016 | 20/11/2016 | 22,59913 | 89,49276 | 48,768 | 4,22  |
| 1_720 | Atik_Nov2016 | 20/11/2016 | 22,5963  | 89,49404 | 30,48  | 3,17  |
| 1_721 | Atik_Nov2016 | 20/11/2016 | 22,59476 | 89,49383 | 28,956 | 3,74  |
| 1_722 | Atik_Nov2016 | 20/11/2016 | 22,59372 | 89,48934 | 24,384 | 5,56  |
| 1_723 | Atik_Nov2016 | 20/11/2016 | 22,59386 | 89,48779 | 12,192 | 4,71  |
| 1_724 | Atik_Nov2016 | 20/11/2016 | 22,59356 | 89,48594 | 13,716 | 9,09  |
| 1_725 | Atik_Nov2016 | 20/11/2016 | 22,59241 | 89,4858  | 18,288 | 10,37 |
| 1_726 | Atik_Nov2016 | 20/11/2016 | 22,59135 | 89,48503 | 32,004 | 10,51 |
| 1_727 | Atik_Nov2016 | 20/11/2016 | 22,58999 | 89,48459 | 15,24  | 8,96  |
| 1_728 | Atik_Nov2016 | 20/11/2016 | 22,6052  | 89,51866 | 24,384 | 5,15  |
| 1_729 | Atik_Nov2016 | 20/11/2016 | 22,60507 | 89,51781 | 54,864 | 5,47  |
| 1_730 | Atik_Nov2016 | 20/11/2016 | 22,60558 | 89,51442 | 18,288 | 5,02  |
| 1_731 | Atik_Nov2016 | 20/11/2016 | 22,60551 | 89,51302 | 36,576 | 4,78  |
| 1_732 | Atik_Nov2016 | 20/11/2016 | 22,60557 | 89,51107 | 24,384 | 4,21  |
| 1_733 | Atik_Nov2016 | 20/11/2016 | 22,60624 | 89,50937 | 24,384 | 4,14  |
| 1_734 | Atik_Nov2016 | 20/11/2016 | 22,60695 | 89,50806 | 24,384 | 3,83  |
| 1_735 | Atik_Nov2016 | 20/11/2016 | 22,60716 | 89,508   | 21,336 | 3,07  |
| 1_736 | Atik_Nov2016 | 20/11/2016 | 22,60692 | 89,50772 | 18,288 | 3,65  |
| 1_737 | Atik_Nov2016 | 20/11/2016 | 22,60699 | 89,50748 | 18,288 | 3,78  |



|       |              |            |          |          |         |      |
|-------|--------------|------------|----------|----------|---------|------|
| 1_738 | Atik_Nov2016 | 20/11/2016 | 22,60714 | 89,50458 | 22,86   | 3,51 |
| 1_739 | Atik_Nov2016 | 20/11/2016 | 22,60715 | 89,50279 | 21,336  | 3,75 |
| 1_740 | Atik_Nov2016 | 20/11/2016 | 22,60738 | 89,5015  | 22,86   | 4,14 |
| 1_741 | Atik_Nov2016 | 20/11/2016 | 22,60848 | 89,49313 | 33,528  | 2,96 |
| 1_742 | Atik_Nov2016 | 20/11/2016 | 22,60813 | 89,49072 | 24,384  | 3,96 |
| 1_743 | Atik_Nov2016 | 20/11/2016 | 22,60858 | 89,47573 | 54,864  | 8,09 |
| 1_744 | Atik_Nov2016 | 20/11/2016 | 22,61615 | 89,47814 | 21,336  | 3,24 |
| 1_745 | Atik_Nov2016 | 22/11/2016 | 22,68074 | 89,51089 | 19,812  | 6,18 |
| 1_746 | Atik_Nov2016 | 22/11/2016 | 22,6779  | 89,51969 | 28,956  | 5,46 |
| 1_747 | Atik_Nov2016 | 22/11/2016 | 22,67743 | 89,52021 | 29,2608 | 5,21 |
| 1_748 | Atik_Nov2016 | 22/11/2016 | 22,67657 | 89,52016 | 27,432  | 3,28 |
| 1_749 | Atik_Nov2016 | 22/11/2016 | 22,67528 | 89,52088 | 27,432  | 6,18 |
| 1_750 | Atik_Nov2016 | 22/11/2016 | 22,67438 | 89,5215  | 27,432  | 5,36 |
| 1_751 | Atik_Nov2016 | 22/11/2016 | 22,67242 | 89,5201  | 26,2128 | 5,05 |
| 1_752 | Atik_Nov2016 | 22/11/2016 | 22,66779 | 89,51375 | 12,8016 | 3,44 |
| 1_753 | Atik_Nov2016 | 22/11/2016 | 22,66676 | 89,51046 | 16,764  | 3,23 |
| 1_754 | Atik_Nov2016 | 22/11/2016 | 22,66567 | 89,50959 | 15,24   | 3,64 |
| 1_755 | Atik_Nov2016 | 22/11/2016 | 22,66478 | 89,50915 | 15,24   | 5,6  |
| 1_756 | Atik_Nov2016 | 22/11/2016 | 22,66366 | 89,50661 | 16,764  | 4,6  |
| 1_757 | Atik_Nov2016 | 22/11/2016 | 22,6614  | 89,50369 | 16,764  | 4,39 |
| 1_758 | Atik_Nov2016 | 22/11/2016 | 22,66041 | 89,50221 | 18,288  | 6,5  |
| 1_759 | Atik_Nov2016 | 22/11/2016 | 22,66004 | 89,50037 | 45,72   | 5,5  |
| 1_760 | Atik_Nov2016 | 22/11/2016 | 22,65994 | 89,49818 | 18,288  | 4,65 |
| 1_761 | Atik_Nov2016 | 22/11/2016 | 22,65823 | 89,49705 | 41,148  | 5,07 |
| 1_762 | Atik_Nov2016 | 22/11/2016 | 22,65747 | 89,49667 | 42,672  | 4,27 |
| 1_763 | Atik_Nov2016 | 22/11/2016 | 22,65812 | 89,49492 | 39,624  | 3,77 |
| 1_764 | Atik_Nov2016 | 22/11/2016 | 22,65485 | 89,49549 | 30,48   | 2,93 |
| 1_765 | Atik_Nov2016 | 22/11/2016 | 22,6551  | 89,49656 | 36,576  | 4,08 |
| 1_766 | Atik_Nov2016 | 22/11/2016 | 22,65446 | 89,49776 | 19,812  | 4,44 |
| 1_767 | Atik_Nov2016 | 22/11/2016 | 22,65398 | 89,49966 | 21,336  | 4,04 |
| 1_768 | Atik_Nov2016 | 22/11/2016 | 22,65176 | 89,50519 | 36,576  | 3,22 |
| 1_769 | Atik_Nov2016 | 22/11/2016 | 22,65131 | 89,50654 | 19,812  | 2,96 |
| 1_770 | Atik_Nov2016 | 22/11/2016 | 22,64669 | 89,50663 | 18,288  | 3,35 |
| 1_771 | Atik_Nov2016 | 22/11/2016 | 22,64701 | 89,5069  | 24,384  | 2,8  |
| 1_772 | Atik_Nov2016 | 22/11/2016 | 22,64438 | 89,50629 | 22,86   | 3,74 |
| 1_773 | Atik_Nov2016 | 22/11/2016 | 22,64447 | 89,5064  | 22,86   | 3,29 |
| 1_774 | Atik_Nov2016 | 22/11/2016 | 22,64348 | 89,50694 | 30,48   | 2,28 |
| 1_775 | Atik_Nov2016 | 22/11/2016 | 22,64323 | 89,50761 | 30,48   | 3,08 |
| 1_776 | Atik_Nov2016 | 22/11/2016 | 22,64252 | 89,50703 | 18,288  | 2,94 |
| 1_777 | Atik_Nov2016 | 22/11/2016 | 22,64455 | 89,50679 | 19,812  | 4,55 |
| 1_778 | Atik_Nov2016 | 22/11/2016 | 22,63899 | 89,5069  | 35,052  | 3,49 |
| 1_779 | Atik_Nov2016 | 22/11/2016 | 22,63785 | 89,5062  | 33,528  | 6,25 |
| 1_780 | Atik_Nov2016 | 23/11/2016 | 22,34402 | 89,10609 | 8,5344  | 8,92 |
| 1_781 | Atik_Nov2016 | 23/11/2016 | 22,34209 | 89,1077  | 10,668  | 2,43 |
| 1_782 | Atik_Nov2016 | 23/11/2016 | 22,34213 | 89,10756 | 8,2296  | 6,31 |
| 1_783 | Atik_Nov2016 | 23/11/2016 | 22,3393  | 89,10386 | 15,24   | 9,65 |
| 1_784 | Atik_Nov2016 | 23/11/2016 | 22,33594 | 89,10371 | 10,9728 | 10,4 |

|       |              |            |          |          |         |       |
|-------|--------------|------------|----------|----------|---------|-------|
| 1_785 | Atik_Nov2016 | 23/11/2016 | 22,33605 | 89,10386 | 10,668  | 9,38  |
| 1_786 | Atik_Nov2016 | 23/11/2016 | 22,33619 | 89,10365 | 13,716  | 8,37  |
| 1_787 | Atik_Nov2016 | 23/11/2016 | 22,33609 | 89,10268 | 10,668  | 9,28  |
| 1_788 | Atik_Nov2016 | 23/11/2016 | 22,32983 | 89,10253 | 10,668  | 3,74  |
| 1_789 | Atik_Nov2016 | 23/11/2016 | 22,33009 | 89,10352 | 10,668  | 9,48  |
| 1_790 | Atik_Nov2016 | 23/11/2016 | 22,3299  | 89,10329 | 12,192  | 10,26 |
| 1_791 | Atik_Nov2016 | 23/11/2016 | 22,32582 | 89,10532 | 7,62    | 4,31  |
| 1_792 | Atik_Nov2016 | 23/11/2016 | 22,32616 | 89,10546 | 9,7536  | 1,35  |
| 1_793 | Atik_Nov2016 | 23/11/2016 | 22,32359 | 89,10616 | 7,9248  | 1,87  |
| 1_794 | Atik_Nov2016 | 23/11/2016 | 22,32311 | 89,10677 | 7,62    | 2,14  |
| 1_795 | Atik_Nov2016 | 23/11/2016 | 22,32191 | 89,10619 | 7,62    | 4,65  |
| 1_796 | Atik_Nov2016 | 23/11/2016 | 22,31943 | 89,10577 | 7,9248  | 6,51  |
| 1_797 | Atik_Nov2016 | 24/11/2016 | 22,24689 | 89,08241 | 15,24   | 10,16 |
| 1_798 | Atik_Nov2016 | 24/11/2016 | 22,22839 | 89,12318 | 21,336  | 13    |
| 1_799 | Atik_Nov2016 | 24/11/2016 | 22,22357 | 89,12661 | 48,768  | 3,41  |
| 1_800 | Atik_Nov2016 | 24/11/2016 | 22,21659 | 89,13338 | 24,384  | 4,88  |
| 1_801 | Atik_Nov2016 | 25/11/2016 | 22,34664 | 89,10097 | 6,7056  | 4,27  |
| 1_802 | Atik_Nov2016 | 25/11/2016 | 22,34664 | 89,10075 | 7,62    | 4,98  |
| 1_803 | Atik_Nov2016 | 25/11/2016 | 22,34661 | 89,10117 | 7,0104  | 4,86  |
| 1_804 | Atik_Nov2016 | 25/11/2016 | 22,36669 | 89,10052 | 57,912  | 8,8   |
| 1_805 | Atik_Nov2016 | 25/11/2016 | 22,36691 | 89,1004  | 42,672  | 9,9   |
| 1_806 | Atik_Nov2016 | 25/11/2016 | 22,36663 | 89,10082 | 18,288  | 9,95  |
| 1_807 | Atik_Nov2016 | 25/11/2016 | 22,37819 | 89,10954 | 56,388  | 8,31  |
| 1_808 | Atik_Nov2016 | 25/11/2016 | 22,37405 | 89,11885 | 9,144   | 2,89  |
| 1_809 | Atik_Nov2016 | 25/11/2016 | 22,37374 | 89,11828 | 9,144   | 4,62  |
| 1_810 | Atik_Nov2016 | 25/11/2016 | 22,37512 | 89,11877 | 9,144   | 2,61  |
| 1_811 | Atik_Nov2016 | 25/11/2016 | 22,37536 | 89,11991 | 12,192  | 0,98  |
| 1_812 | Atik_Nov2016 | 25/11/2016 | 22,37531 | 89,11961 | 12,192  | 0,84  |
| 1_813 | Atik_Nov2016 | 25/11/2016 | 22,37499 | 89,12249 | 10,668  | 1,11  |
| 1_814 | Atik_Nov2016 | 25/11/2016 | 22,37509 | 89,12265 | 10,668  | 1,1   |
| 1_815 | Atik_Nov2016 | 25/11/2016 | 22,37455 | 89,12447 | 10,668  | 0,61  |
| 1_816 | Atik_Nov2016 | 25/11/2016 | 22,3763  | 89,12728 | 20,1168 | 3,25  |
| 1_817 | Atik_Nov2016 | 25/11/2016 | 22,37616 | 89,12767 | 24,9936 | 2,84  |
| 1_818 | Atik_Nov2016 | 25/11/2016 | 22,37597 | 89,12774 | 18,288  | 2,71  |
| 1_819 | Atik_Nov2016 | 25/11/2016 | 22,37813 | 89,12711 | 22,86   | 2,93  |
| 1_820 | Atik_Nov2016 | 25/11/2016 | 22,37855 | 89,12695 | 22,86   | 4,1   |
| 1_821 | Atik_Nov2016 | 25/11/2016 | 22,37864 | 89,12674 | 10,668  | 6,1   |
| 1_822 | Atik_Nov2016 | 25/11/2016 | 22,38038 | 89,12694 | 13,716  | 3,99  |
| 1_823 | Atik_Nov2016 | 25/11/2016 | 22,38159 | 89,12733 | 10,668  | 2,51  |
| 1_824 | Atik_Nov2016 | 25/11/2016 | 22,38299 | 89,12491 | 10,668  | 1,7   |
| 1_825 | Atik_Nov2016 | 25/11/2016 | 22,38336 | 89,12479 | 10,668  | 1,15  |
| 1_826 | Atik_Nov2016 | 25/11/2016 | 22,3857  | 89,12484 | 15,24   | 1,91  |
| 1_827 | Atik_Nov2016 | 25/11/2016 | 22,38568 | 89,1246  | 15,24   | 0,97  |
| 1_828 | Atik_Nov2016 | 25/11/2016 | 22,38708 | 89,12482 | 13,716  | 1,57  |
| 1_829 | Atik_Nov2016 | 25/11/2016 | 22,3859  | 89,12671 | 10,668  | 3,78  |
| 1_830 | Atik_Nov2016 | 25/11/2016 | 22,38866 | 89,12364 | 10,668  | 0,88  |
| 1_831 | Atik_Nov2016 | 25/11/2016 | 22,39374 | 89,12013 | 6,096   | 0,72  |

|       |              |            |          |          |         |       |
|-------|--------------|------------|----------|----------|---------|-------|
| 1_832 | Atik_Nov2016 | 25/11/2016 | 22,39399 | 89,12038 | 9,144   | 1,24  |
| 1_833 | Atik_Nov2016 | 25/11/2016 | 22,39381 | 89,12053 | 9,144   | 0,79  |
| 1_834 | Atik_Nov2016 | 25/11/2016 | 22,39638 | 89,12413 | 9,144   | 3,23  |
| 1_835 | Atik_Nov2016 | 25/11/2016 | 22,39655 | 89,124   | 7,62    | 1,42  |
| 1_836 | Atik_Nov2016 | 25/11/2016 | 22,39478 | 89,12685 | 9,144   | 3,65  |
| 1_837 | Atik_Nov2016 | 26/11/2016 | 22,37329 | 89,09402 | 15,24   | 11,05 |
| 1_838 | Atik_Nov2016 | 26/11/2016 | 22,37705 | 89,09538 | 57,912  | 8,37  |
| 1_839 | Atik_Nov2016 | 26/11/2016 | 22,37712 | 89,09628 | 24,384  | 8,78  |
| 1_840 | Atik_Nov2016 | 26/11/2016 | 22,37854 | 89,0954  | 59,436  | 8,69  |
| 1_841 | Atik_Nov2016 | 26/11/2016 | 22,37997 | 89,09727 | 54,864  | 8,54  |
| 1_842 | Atik_Nov2016 | 26/11/2016 | 22,38164 | 89,09326 | 12,192  | 3,1   |
| 1_843 | Atik_Nov2016 | 26/11/2016 | 22,38161 | 89,09375 | 28,956  | 8,42  |
| 1_844 | Atik_Nov2016 | 26/11/2016 | 22,382   | 89,0922  | 16,764  | 1,48  |
| 1_845 | Atik_Nov2016 | 26/11/2016 | 22,38288 | 89,09274 | 9,7536  | 1,8   |
| 1_846 | Atik_Nov2016 | 26/11/2016 | 22,38265 | 89,09161 | 17,6784 | 5,5   |
| 1_847 | Atik_Nov2016 | 26/11/2016 | 22,38376 | 89,09031 | 13,716  | 4,07  |
| 1_848 | Atik_Nov2016 | 26/11/2016 | 22,38394 | 89,09041 | 57,912  | 9,08  |
| 1_849 | Atik_Nov2016 | 26/11/2016 | 22,38758 | 89,0839  | 12,192  | 9,72  |
| 1_850 | Atik_Nov2016 | 26/11/2016 | 22,39293 | 89,07964 | 18,288  | 13,94 |
| 1_851 | Atik_Nov2016 | 26/11/2016 | 22,39796 | 89,07746 | 9,144   | 1,97  |
| 1_852 | Atik_Nov2016 | 26/11/2016 | 22,39749 | 89,07854 | 33,528  | 1,52  |
| 1_853 | Atik_Nov2016 | 26/11/2016 | 22,39732 | 89,07858 | 45,72   | 0,98  |
| 1_854 | Atik_Nov2016 | 26/11/2016 | 22,39979 | 89,07959 | 19,812  | 0,84  |
| 1_855 | Atik_Nov2016 | 26/11/2016 | 22,40001 | 89,07988 | 18,288  | 1,08  |
| 1_856 | Atik_Nov2016 | 26/11/2016 | 22,40016 | 89,07979 | 15,24   | 0,88  |
| 1_857 | Atik_Nov2016 | 26/11/2016 | 22,40237 | 89,07901 | 30,48   | 0,51  |
| 1_858 | Atik_Nov2016 | 26/11/2016 | 22,40421 | 89,07883 | 32,9184 | 0,94  |
| 1_859 | Atik_Nov2016 | 26/11/2016 | 22,40512 | 89,07918 | 24,384  | 1,05  |
| 1_860 | Atik_Nov2016 | 26/11/2016 | 22,40696 | 89,07945 | 21,336  | 0,76  |
| 1_861 | Atik_Nov2016 | 26/11/2016 | 22,40773 | 89,07808 | 24,384  | 0,73  |
| 1_862 | Atik_Nov2016 | 26/11/2016 | 22,40885 | 89,07528 | 7,62    | 0,71  |
| 1_863 | Atik_Nov2016 | 26/11/2016 | 22,41113 | 89,07686 | 48,768  | 0,63  |
| 1_864 | Atik_Nov2016 | 26/11/2016 | 22,41329 | 89,07755 | 16,1544 | 0,75  |
| 1_865 | Atik_Nov2016 | 26/11/2016 | 22,41546 | 89,07722 | 18,288  | 0,72  |
| 1_866 | Atik_Nov2016 | 26/11/2016 | 22,4173  | 89,07716 | 18,288  | 0,7   |
| 1_867 | Atik_Nov2016 | 26/11/2016 | 22,41865 | 89,07655 | 36,576  | 0,52  |
| 1_868 | Atik_Nov2016 | 26/11/2016 | 22,42087 | 89,07643 | 44,196  | 0,62  |
| 1_869 | Atik_Nov2016 | 26/11/2016 | 22,42312 | 89,07661 | 24,384  | 0,75  |
| 1_870 | Atik_Nov2016 | 26/11/2016 | 22,42309 | 89,07663 | 36,576  | 0,63  |
| 1_871 | Atik_Nov2016 | 26/11/2016 | 22,42595 | 89,07652 | 21,9456 | 1,55  |
| 1_872 | Atik_Nov2016 | 26/11/2016 | 22,42953 | 89,07632 | 21,336  | 1,61  |
| 1_873 | Atik_Nov2016 | 26/11/2016 | 22,43168 | 89,07565 | 21,336  | 1,61  |
| 1_874 | Atik_Nov2016 | 26/11/2016 | 22,4335  | 89,07558 | 28,956  | 1,18  |
| 1_875 | Atik_Nov2016 | 26/11/2016 | 22,43731 | 89,07516 | 21,336  | 2,02  |
| 1_876 | Atik_Nov2016 | 26/11/2016 | 22,43933 | 89,07529 | 28,956  | 3,71  |
| 1_877 | Atik_Nov2016 | 26/11/2016 | 22,43912 | 89,07564 | 16,764  | 2,26  |
| 1_878 | Atik_Nov2016 | 26/11/2016 | 22,44168 | 89,07512 | 18,288  | 3,02  |

|       |              |            |          |          |         |       |
|-------|--------------|------------|----------|----------|---------|-------|
| 1_879 | Atik_Nov2016 | 26/11/2016 | 22,44476 | 89,07501 | 25,908  | 2,08  |
| 1_880 | Atik_Nov2016 | 26/11/2016 | 22,44715 | 89,07533 | 33,528  | 1,73  |
| 1_881 | Atik_Nov2016 | 26/11/2016 | 22,44753 | 89,07576 | 15,24   | 1,01  |
| 1_882 | Atik_Nov2016 | 26/11/2016 | 22,44834 | 89,0762  | 22,86   | 1,59  |
| 1_883 | Atik_Nov2016 | 26/11/2016 | 22,45071 | 89,07719 | 21,336  | 1,02  |
| 1_884 | Atik_Nov2016 | 26/11/2016 | 22,45179 | 89,07757 | 27,432  | 1,26  |
| 1_885 | Atik_Nov2016 | 26/11/2016 | 22,45355 | 89,07646 | 18,288  | 1,19  |
| 1_886 | Atik_Nov2016 | 26/11/2016 | 22,4555  | 89,07832 | 32,004  | 1,04  |
| 1_887 | Atik_Nov2016 | 26/11/2016 | 22,45545 | 89,0785  | 42,672  | 1     |
| 1_888 | Atik_Nov2016 | 27/06/2016 | 22,29848 | 89,10229 | 42,672  | 13,48 |
| 1_889 | Atik_Nov2016 | 27/06/2016 | 22,30371 | 89,10601 | 9,144   | 11,13 |
| 1_890 | Atik_Nov2016 | 27/06/2016 | 22,3041  | 89,10529 | 9,144   | 10,3  |
| 1_891 | Atik_Nov2016 | 27/06/2016 | 22,30709 | 89,10566 | 7,62    | 2,54  |
| 1_892 | Atik_Nov2016 | 27/06/2016 | 22,30679 | 89,1059  | 18,288  | 1,43  |
| 1_893 | Atik_Nov2016 | 27/06/2016 | 22,31734 | 89,10643 | 21,336  | 10,95 |
| 1_894 | Atik_Nov2016 | 27/06/2016 | 22,31781 | 89,10546 | 21,336  | 11,84 |
| 1_895 | Atik_Nov2016 | 27/06/2016 | 22,31777 | 89,10596 | 21,336  | 10,25 |
| 1_896 | Atik_Dec2016 | 12/12/2016 | 22,70371 | 89,464   | 54,864  | 4,92  |
| 1_897 | Atik_Dec2016 | 12/12/2016 | 22,7037  | 89,46425 | 48,768  | 4,46  |
| 1_898 | Atik_Dec2016 | 12/12/2016 | 22,70236 | 89,4569  | 43,8912 | 5,31  |
| 1_899 | Atik_Dec2016 | 12/12/2016 | 22,70074 | 89,45482 | 48,768  | 4,92  |
| 1_900 | Atik_Dec2016 | 12/12/2016 | 22,69826 | 89,45335 | 45,72   | 1,51  |
| 1_901 | Atik_Dec2016 | 12/12/2016 | 22,69568 | 89,45203 | 24,384  | 2,83  |
| 1_902 | Atik_Dec2016 | 12/12/2016 | 22,69502 | 89,45047 | 18,288  | 3,84  |
| 1_903 | Atik_Dec2016 | 12/12/2016 | 22,69491 | 89,45037 | 18,288  | 3,92  |
| 1_904 | Atik_Dec2016 | 12/12/2016 | 22,68943 | 89,44792 | 21,336  | 3,21  |
| 1_905 | Atik_Dec2016 | 12/12/2016 | 22,6893  | 89,44794 | 36,576  | 3,91  |
| 1_906 | Atik_Dec2016 | 12/12/2016 | 22,68538 | 89,44495 | 28,956  | 3,39  |
| 1_907 | Atik_Dec2016 | 12/12/2016 | 22,68543 | 89,44464 | 22,86   | 2,77  |
| 1_908 | Atik_Dec2016 | 12/12/2016 | 22,68556 | 89,4446  | 22,86   | 2,78  |
| 1_909 | Atik_Dec2016 | 12/12/2016 | 22,68386 | 89,44276 | 21,336  | 3,56  |
| 1_910 | Atik_Dec2016 | 12/12/2016 | 22,67896 | 89,44085 | 30,48   | 2,62  |
| 1_911 | Atik_Dec2016 | 12/12/2016 | 22,67165 | 89,43885 | 21,336  | 3,21  |
| 1_912 | Atik_Dec2016 | 12/12/2016 | 22,66525 | 89,43958 | 27,432  | 3,96  |
| 1_913 | Atik_Dec2016 | 12/12/2016 | 22,66541 | 89,4395  | 36,576  | 3,72  |
| 1_914 | Atik_Dec2016 | 12/12/2016 | 22,66543 | 89,43971 | 36,576  | 3,26  |
| 1_915 | Atik_Dec2016 | 12/12/2016 | 22,6664  | 89,44632 | 36,576  | 3,37  |
| 1_916 | Atik_Dec2016 | 12/12/2016 | 22,66712 | 89,44662 | 36,576  | 3,28  |
| 1_917 | Atik_Dec2016 | 12/12/2016 | 22,66709 | 89,44673 | 26,8224 | 2,52  |
| 1_918 | Atik_Dec2016 | 12/12/2016 | 22,67229 | 89,44844 | 36,576  | 4,53  |
| 1_919 | Atik_Dec2016 | 12/12/2016 | 22,67398 | 89,44944 | 33,528  | 4,24  |
| 1_920 | Atik_Dec2016 | 12/12/2016 | 22,67863 | 89,45226 | 32,004  | 3,57  |
| 1_921 | Atik_Dec2016 | 12/12/2016 | 22,68052 | 89,45256 | 15,24   | 3,51  |
| 1_922 | Atik_Dec2016 | 12/12/2016 | 22,6846  | 89,4567  | 51,816  | 3,55  |
| 1_923 | Atik_Dec2016 | 12/12/2016 | 22,68699 | 89,4662  | 36,576  | 3,58  |
| 1_924 | Atik_Dec2016 | 12/12/2016 | 22,67955 | 89,45544 | 47,244  | 3,37  |
| 1_925 | Atik_Dec2016 | 12/12/2016 | 22,67933 | 89,4652  | 45,72   | 3,36  |

|       |              |            |          |          |        |      |
|-------|--------------|------------|----------|----------|--------|------|
| 1_926 | Atik_Dec2016 | 12/12/2016 | 22,67716 | 89,46754 | 45,72  | 3,34 |
| 1_927 | Atik_Dec2016 | 13/12/2016 | 22,71412 | 89,45576 | 45,72  | 4,89 |
| 1_928 | Atik_Dec2016 | 13/12/2016 | 22,71072 | 89,45609 | 54,864 | 2,7  |
| 1_929 | Atik_Dec2016 | 13/12/2016 | 22,70806 | 89,45556 | 32,004 | 6,1  |
| 1_930 | Atik_Dec2016 | 13/12/2016 | 22,70786 | 89,45551 | 54,864 | 3,63 |
| 1_931 | Atik_Dec2016 | 13/12/2016 | 22,70596 | 89,45444 | 45,72  | 1,68 |
| 1_932 | Atik_Dec2016 | 13/12/2016 | 22,69718 | 89,44666 | 33,528 | 5,17 |
| 1_933 | Atik_Dec2016 | 13/12/2016 | 22,70193 | 89,43942 | 30,48  | 4,32 |
| 1_934 | Atik_Dec2016 | 13/12/2016 | 22,70185 | 89,43842 | 47,244 | 3,61 |
| 1_935 | Atik_Dec2016 | 13/12/2016 | 22,70169 | 89,43517 | 45,72  | 3,9  |
| 1_936 | Atik_Dec2016 | 13/12/2016 | 22,70066 | 89,43454 | 54,864 | 4,09 |
| 1_937 | Atik_Dec2016 | 13/12/2016 | 22,69912 | 89,43407 | 54,864 | 2,81 |
| 1_938 | Atik_Dec2016 | 13/12/2016 | 22,69806 | 89,43367 | 45,72  | 2,57 |
| 1_939 | Atik_Dec2016 | 13/12/2016 | 22,69661 | 89,43211 | 53,34  | 1,94 |
| 1_940 | Atik_Dec2016 | 13/12/2016 | 22,69673 | 89,43215 | 36,576 | 1,74 |
| 1_941 | Atik_Dec2016 | 13/12/2016 | 22,69594 | 89,43208 | 27,432 | 1,92 |
| 1_942 | Atik_Dec2016 | 13/12/2016 | 22,69575 | 89,43224 | 19,812 | 2,47 |
| 1_943 | Atik_Dec2016 | 13/12/2016 | 22,6956  | 89,43222 | 18,288 | 2,47 |
| 1_944 | Atik_Dec2016 | 13/12/2016 | 22,69552 | 89,43221 | 24,384 | 2,58 |
| 1_945 | Atik_Dec2016 | 13/12/2016 | 22,69647 | 89,43079 | 39,624 | 3,32 |
| 1_946 | Atik_Dec2016 | 13/12/2016 | 22,69635 | 89,43018 | 30,48  | 1,45 |
| 1_947 | Atik_Dec2016 | 13/12/2016 | 22,6962  | 89,43006 | 28,956 | 1,7  |
| 1_948 | Atik_Dec2016 | 13/12/2016 | 22,69621 | 89,42941 | 27,432 | 2,99 |
| 1_949 | Atik_Dec2016 | 13/12/2016 | 22,69603 | 89,42944 | 27,432 | 1,96 |
| 1_950 | Atik_Dec2016 | 13/12/2016 | 22,69592 | 89,42881 | 21,336 | 1,65 |
| 1_951 | Atik_Dec2016 | 13/12/2016 | 22,69605 | 89,42863 | 19,812 | 1,31 |
| 1_952 | Atik_Dec2016 | 13/12/2016 | 22,69615 | 89,42804 | 21,336 | 0,95 |
| 1_953 | Atik_Dec2016 | 13/12/2016 | 22,69617 | 89,4281  | 18,288 | 1,38 |
| 1_954 | Atik_Dec2016 | 13/12/2016 | 22,69631 | 89,42611 | 22,86  | 1,57 |
| 1_955 | Atik_Dec2016 | 13/12/2016 | 22,70007 | 89,42587 | 21,336 | 1,12 |
| 1_956 | Atik_Dec2016 | 13/12/2016 | 22,70249 | 89,42654 | 27,432 | 2,03 |
| 1_957 | Atik_Dec2016 | 13/12/2016 | 22,7042  | 89,4324  | 33,528 | 2,04 |
| 1_958 | Atik_Dec2016 | 13/12/2016 | 22,70913 | 89,44318 | 27,432 | 1,3  |
| 1_959 | Atik_Dec2016 | 13/12/2016 | 22,71372 | 89,43897 | 28,956 | 1,32 |
| 1_960 | Atik_Dec2016 | 13/12/2016 | 22,7151  | 89,43645 | 18,288 | 1,36 |
| 1_961 | Atik_Dec2016 | 13/12/2016 | 22,71707 | 89,43301 | 21,336 | 1,48 |
| 1_962 | Atik_Dec2016 | 13/12/2016 | 22,71873 | 89,43188 | 27,432 | 1,75 |
| 1_963 | Atik_Dec2016 | 13/12/2016 | 22,72085 | 89,43102 | 45,72  | 2,35 |
| 1_964 | Atik_Dec2016 | 13/12/2016 | 22,72349 | 89,43008 | 27,432 | 1,89 |
| 1_965 | Atik_Dec2016 | 13/12/2016 | 22,72634 | 89,42883 | 33,528 | 2,01 |
| 1_966 | Atik_Dec2016 | 14/12/2016 | 22,70301 | 89,46722 | 54,864 | 4,63 |
| 1_967 | Atik_Dec2016 | 14/12/2016 | 22,70169 | 89,46723 | 54,864 | 5,16 |
| 1_968 | Atik_Dec2016 | 14/12/2016 | 22,67188 | 89,4609  | 35,052 | 2,95 |
| 1_969 | Atik_Dec2016 | 14/12/2016 | 22,67221 | 89,46152 | 36,576 | 2,63 |
| 1_970 | Atik_Dec2016 | 14/12/2016 | 22,66375 | 89,45937 | 48,768 | 4,05 |
| 1_971 | Atik_Dec2016 | 14/12/2016 | 22,6636  | 89,47157 | 53,34  | 3,97 |
| 1_972 | Atik_Dec2016 | 14/12/2016 | 22,669   | 89,47256 | 51,816 | 3,34 |

|        |              |            |          |          |         |      |
|--------|--------------|------------|----------|----------|---------|------|
| 1_973  | Atik_Dec2016 | 14/12/2016 | 22,66887 | 89,47306 | 45,72   | 3,37 |
| 1_974  | Atik_Dec2016 | 14/12/2016 | 22,66854 | 89,47296 | 44,196  | 3,27 |
| 1_975  | Atik_Dec2016 | 14/12/2016 | 22,66635 | 89,47974 | 33,528  | 7,22 |
| 1_976  | Atik_Dec2016 | 14/12/2016 | 22,66155 | 89,48308 | 36,576  | 4,23 |
| 1_977  | Atik_Dec2016 | 14/12/2016 | 22,66171 | 89,48315 | 32,004  | 4,06 |
| 1_978  | Atik_Dec2016 | 14/12/2016 | 22,66276 | 89,4856  | 44,196  | 5,2  |
| 1_979  | Atik_Dec2016 | 14/12/2016 | 22,66251 | 89,48582 | 45,72   | 4,63 |
| 1_980  | Atik_Dec2016 | 14/12/2016 | 22,66018 | 89,47894 | 39,624  | 4,24 |
| 1_981  | Atik_Dec2016 | 14/12/2016 | 22,6574  | 89,47807 | 45,72   | 4,71 |
| 1_982  | Atik_Dec2016 | 14/12/2016 | 22,65739 | 89,47843 | 45,72   | 4,71 |
| 1_983  | Atik_Dec2016 | 14/12/2016 | 22,65777 | 89,47587 | 48,768  | 4,02 |
| 1_984  | Atik_Dec2016 | 14/12/2016 | 22,65948 | 89,47453 | 36,576  | 3,37 |
| 1_985  | Atik_Dec2016 | 14/12/2016 | 22,65599 | 89,47607 | 50,292  | 4,05 |
| 1_986  | Atik_Dec2016 | 14/12/2016 | 22,65553 | 89,47414 | 21,336  | 5,9  |
| 1_987  | Atik_Dec2016 | 14/12/2016 | 22,65569 | 89,4718  | 32,004  | 3,43 |
| 1_988  | Atik_Dec2016 | 14/12/2016 | 22,65499 | 89,4706  | 32,004  | 3,05 |
| 1_989  | Atik_Dec2016 | 14/12/2016 | 22,6544  | 89,4698  | 50,292  | 3,58 |
| 1_990  | Atik_Dec2016 | 14/12/2016 | 22,64744 | 89,46971 | 36,576  | 5,82 |
| 1_991  | Atik_Dec2016 | 14/12/2016 | 22,64778 | 89,46983 | 36,576  | 4,32 |
| 1_992  | Atik_Dec2016 | 14/12/2016 | 22,64789 | 89,47018 | 36,576  | 2,88 |
| 1_993  | Atik_Dec2016 | 14/12/2016 | 22,6486  | 89,46874 | 36,576  | 4,02 |
| 1_994  | Atik_Dec2016 | 14/12/2016 | 22,6461  | 89,47466 | 36,576  | 4,93 |
| 1_995  | Atik_Dec2016 | 14/12/2016 | 22,64826 | 89,47554 | 36,576  | 4,62 |
| 1_996  | Atik_Dec2016 | 14/12/2016 | 22,64886 | 89,47474 | 39,624  | 4,39 |
| 1_997  | Atik_Dec2016 | 14/12/2016 | 22,6495  | 89,47518 | 39,624  | 5,03 |
| 1_998  | Atik_Dec2016 | 14/12/2016 | 22,64855 | 89,47581 | 48,768  | 6,23 |
| 1_999  | Atik_Dec2016 | 14/12/2016 | 22,64798 | 89,47672 | 36,576  | 5,31 |
| 1_1000 | Atik_Dec2016 | 14/12/2016 | 22,64605 | 89,47313 | 42,672  | 4,18 |
| 1_1001 | Atik_Dec2016 | 14/12/2016 | 22,65245 | 89,44068 | 44,196  | 7,08 |
| 1_1002 | Atik_Dec2016 | 14/12/2016 | 22,65496 | 89,43848 | 42,672  | 6,86 |
| 1_1003 | Atik_Dec2016 | 14/12/2016 | 22,65528 | 89,43446 | 39,624  | 5,15 |
| 1_1004 | Atik_Dec2016 | 14/12/2016 | 22,65482 | 89,43308 | 42,672  | 4,3  |
| 1_1005 | Atik_Dec2016 | 14/12/2016 | 22,6582  | 89,43928 | 36,576  | 4,34 |
| 1_1006 | Atik_Dec2016 | 14/12/2016 | 22,64679 | 89,42864 | 19,812  | 8,73 |
| 1_1007 | Atik_Dec2016 | 14/12/2016 | 22,64664 | 89,42771 | 45,72   | 9,63 |
| 1_1008 | Atik_Dec2016 | 14/12/2016 | 22,64825 | 89,42046 | 21,336  | 4,29 |
| 1_1009 | Atik_Dec2016 | 14/12/2016 | 22,6484  | 89,42004 | 13,716  | 4,29 |
| 1_1010 | Atik_Dec2016 | 14/12/2016 | 22,64832 | 89,41496 | 27,432  | 3,19 |
| 1_1011 | Atik_Dec2016 | 14/12/2016 | 22,64797 | 89,41438 | 36,576  | 3,73 |
| 1_1012 | Atik_Dec2016 | 14/12/2016 | 22,64833 | 89,41307 | 30,48   | 3,12 |
| 1_1013 | Atik_Dec2016 | 14/12/2016 | 22,64909 | 89,41268 | 33,528  | 2,72 |
| 1_1014 | Atik_Dec2016 | 14/12/2016 | 22,64907 | 89,41239 | 36,576  | 4,24 |
| 1_1015 | Atik_Dec2016 | 14/12/2016 | 22,6495  | 89,41184 | 32,9184 | 3,19 |
| 1_1016 | Atik_Dec2016 | 14/12/2016 | 22,65171 | 89,41079 | 30,48   | 2,97 |
| 1_1017 | Atik_Dec2016 | 14/12/2016 | 22,65362 | 89,40994 | 28,956  | 2,46 |
| 1_1018 | Atik_Dec2016 | 14/12/2016 | 22,65536 | 89,4093  | 33,528  | 3,94 |
| 1_1019 | Atik_Dec2016 | 14/12/2016 | 22,6588  | 89,40551 | 15,24   | 5,66 |

|        |              |            |          |          |         |      |
|--------|--------------|------------|----------|----------|---------|------|
| 1_1020 | Atik_Dec2016 | 14/12/2016 | 22,65999 | 89,40541 | 15,24   | 2,83 |
| 1_1021 | Atik_Dec2016 | 14/12/2016 | 22,66153 | 89,40521 | 15,24   | 2,42 |
| 1_1022 | Atik_Dec2016 | 14/12/2016 | 22,66398 | 89,40479 | 33,528  | 2,72 |
| 1_1023 | Atik_Dec2016 | 14/12/2016 | 22,66541 | 89,40374 | 36,576  | 2,15 |
| 1_1024 | Atik_Dec2016 | 14/12/2016 | 22,66719 | 89,40488 | 21,336  | 1,11 |
| 1_1025 | Atik_Dec2016 | 14/12/2016 | 22,66747 | 89,4049  | 21,336  | 1,95 |
| 1_1026 | Atik_Dec2016 | 14/12/2016 | 22,66803 | 89,40592 | 9,144   | 1,26 |
| 1_1027 | Atik_Dec2016 | 14/12/2016 | 22,66796 | 89,40586 | 15,24   | 2,26 |
| 1_1028 | Atik_Dec2016 | 14/12/2016 | 22,66837 | 89,40797 | 13,716  | 3,92 |
| 1_1029 | Atik_Dec2016 | 14/12/2016 | 22,66843 | 89,40818 | 15,24   | 3,07 |
| 1_1030 | Atik_Dec2016 | 14/12/2016 | 22,66879 | 89,40961 | 27,432  | 4,2  |
| 1_1031 | Atik_Dec2016 | 14/12/2016 | 22,6684  | 89,41351 | 10,668  | 2,36 |
| 1_1032 | Atik_Dec2016 | 14/12/2016 | 22,66751 | 89,41426 | 13,716  | 2,33 |
| 1_1033 | Atik_Dec2016 | 14/12/2016 | 22,66673 | 89,41708 | 13,4112 | 1,73 |
| 1_1034 | Atik_Dec2016 | 14/12/2016 | 22,66677 | 89,41734 | 13,716  | 1,41 |
| 1_1035 | Atik_Dec2016 | 14/12/2016 | 22,66666 | 89,41855 | 16,764  | 1,38 |
| 1_1036 | Atik_Dec2016 | 14/12/2016 | 22,66586 | 89,42068 | 15,24   | 1,57 |
| 1_1037 | Atik_Dec2016 | 14/12/2016 | 22,66409 | 89,42421 | 45,72   | 2,3  |
| 1_1038 | Atik_Dec2016 | 14/12/2016 | 22,67642 | 89,40829 | 15,24   | 2,74 |
| 1_1039 | Atik_Dec2016 | 14/12/2016 | 22,67649 | 89,4082  | 41,148  | 3,86 |
| 1_1040 | Atik_Dec2016 | 14/12/2016 | 22,67636 | 89,4099  | 36,576  | 3,34 |
| 1_1041 | Atik_Dec2016 | 14/12/2016 | 22,67641 | 89,41023 | 36,576  | 3,72 |
| 1_1042 | Atik_Dec2016 | 14/12/2016 | 22,67618 | 89,41026 | 18,288  | 2,71 |
| 1_1043 | Atik_Dec2016 | 14/12/2016 | 22,67709 | 89,41133 | 48,768  | 3,51 |
| 1_1044 | Atik_Dec2016 | 14/12/2016 | 22,67724 | 89,41351 | 36,576  | 3,14 |
| 1_1045 | Atik_Dec2016 | 14/12/2016 | 22,67686 | 89,41547 | 24,384  | 2,89 |
| 1_1046 | Atik_Dec2016 | 14/12/2016 | 22,67687 | 89,4155  | 27,432  | 3,06 |
| 1_1047 | Atik_Dec2016 | 14/12/2016 | 22,67714 | 89,41806 | 25,908  | 2,28 |
| 1_1048 | Atik_Dec2016 | 14/12/2016 | 22,67787 | 89,42    | 24,384  | 1,98 |
| 1_1049 | Atik_Dec2016 | 14/12/2016 | 22,67739 | 89,41955 | 30,48   | 4,24 |
| 1_1050 | Atik_Dec2016 | 14/12/2016 | 22,67727 | 89,4233  | 25,908  | 3,87 |
| 1_1051 | Atik_Dec2016 | 14/12/2016 | 22,67705 | 89,42651 | 21,336  | 1,91 |
| 1_1052 | Atik_Dec2016 | 14/12/2016 | 22,67704 | 89,42915 | 22,86   | 2,05 |
| 1_1053 | Atik_Dec2016 | 14/12/2016 | 22,68483 | 89,4295  | 36,576  | 1,56 |
| 1_1054 | Atik_Dec2016 | 15/12/2016 | 22,58452 | 89,32625 | 45,72   | 3,96 |
| 1_1055 | Atik_Dec2016 | 15/12/2016 | 22,58461 | 89,32713 | 42,672  | 3,17 |
| 1_1056 | Atik_Dec2016 | 15/12/2016 | 22,5844  | 89,32827 | 57,912  | 2,67 |
| 1_1057 | Atik_Dec2016 | 15/12/2016 | 22,58363 | 89,32889 | 27,432  | 2,64 |
| 1_1058 | Atik_Dec2016 | 15/12/2016 | 22,58284 | 89,33002 | 54,864  | 2,48 |
| 1_1059 | Atik_Dec2016 | 15/12/2016 | 22,5818  | 89,33076 | 33,528  | 1,99 |
| 1_1060 | Atik_Dec2016 | 15/12/2016 | 22,58043 | 89,33052 | 54,864  | 3,28 |
| 1_1061 | Atik_Dec2016 | 15/12/2016 | 22,58053 | 89,3299  | 56,388  | 3,85 |
| 1_1062 | Atik_Dec2016 | 15/12/2016 | 22,57907 | 89,33119 | 48,768  | 3,2  |
| 1_1063 | Atik_Dec2016 | 15/12/2016 | 22,57823 | 89,33792 | 54,864  | 3,08 |
| 1_1064 | Atik_Dec2016 | 15/12/2016 | 22,57761 | 89,33175 | 30,48   | 1,8  |
| 1_1065 | Atik_Dec2016 | 15/12/2016 | 22,57737 | 89,33153 | 30,48   | 4,26 |
| 1_1066 | Atik_Dec2016 | 15/12/2016 | 22,57739 | 89,33173 | 30,48   | 4,14 |

|        |              |            |          |          |         |      |
|--------|--------------|------------|----------|----------|---------|------|
| 1_1067 | Atik_Dec2016 | 15/12/2016 | 22,57746 | 89,33195 | 30,48   | 3,82 |
| 1_1068 | Atik_Dec2016 | 15/12/2016 | 22,57678 | 89,33295 | 48,768  | 2,85 |
| 1_1069 | Atik_Dec2016 | 15/12/2016 | 22,57571 | 89,33362 | 48,768  | 2,96 |
| 1_1070 | Atik_Dec2016 | 15/12/2016 | 22,57427 | 89,33365 | 45,72   | 3,88 |
| 1_1071 | Atik_Dec2016 | 15/12/2016 | 22,57459 | 89,33266 | 53,34   | 5,15 |
| 1_1072 | Atik_Dec2016 | 15/12/2016 | 22,57136 | 89,33513 | 42,672  | 5,14 |
| 1_1073 | Atik_Dec2016 | 15/12/2016 | 22,57001 | 89,33574 | 21,336  | 4,15 |
| 1_1074 | Atik_Dec2016 | 15/12/2016 | 22,56842 | 89,33527 | 36,576  | 4,3  |
| 1_1075 | Atik_Dec2016 | 15/12/2016 | 22,56781 | 89,33269 | 53,34   | 4,1  |
| 1_1076 | Atik_Dec2016 | 15/12/2016 | 22,56775 | 89,33134 | 45,72   | 5,5  |
| 1_1077 | Atik_Dec2016 | 15/12/2016 | 22,56761 | 89,32928 | 41,148  | 5,29 |
| 1_1078 | Atik_Dec2016 | 15/12/2016 | 22,5671  | 89,32852 | 45,72   | 4,24 |
| 1_1079 | Atik_Dec2016 | 15/12/2016 | 22,56711 | 89,32745 | 30,48   | 4,73 |
| 1_1080 | Atik_Dec2016 | 15/12/2016 | 22,56639 | 89,32603 | 50,292  | 4,91 |
| 1_1081 | Atik_Dec2016 | 15/12/2016 | 22,56666 | 89,32562 | 57,912  | 5,49 |
| 1_1082 | Atik_Dec2016 | 15/12/2016 | 22,56647 | 89,32473 | 48,768  | 5,56 |
| 1_1083 | Atik_Dec2016 | 15/12/2016 | 22,56632 | 89,323   | 53,34   | 4,14 |
| 1_1084 | Atik_Dec2016 | 15/12/2016 | 22,56706 | 89,32153 | 54,864  | 3,1  |
| 1_1085 | Atik_Dec2016 | 15/12/2016 | 22,5668  | 89,32011 | 48,768  | 2,66 |
| 1_1086 | Atik_Dec2016 | 15/12/2016 | 22,56911 | 89,31914 | 48,768  | 2,06 |
| 1_1087 | Atik_Dec2016 | 15/12/2016 | 22,62806 | 89,30276 | 21,336  | 0,67 |
| 1_1088 | Atik_Dec2016 | 15/12/2016 | 22,62615 | 89,30283 | 22,86   | 0,58 |
| 1_1089 | Atik_Dec2016 | 15/12/2016 | 22,62452 | 89,30379 | 21,336  | 0,63 |
| 1_1090 | Atik_Dec2016 | 15/12/2016 | 22,62436 | 89,30363 | 42,672  | 0,59 |
| 1_1091 | Atik_Dec2016 | 15/12/2016 | 22,62213 | 89,30388 | 22,86   | 0,66 |
| 1_1092 | Atik_Dec2016 | 15/12/2016 | 22,62025 | 89,30449 | 44,196  | 0,72 |
| 1_1093 | Atik_Dec2016 | 15/12/2016 | 22,61743 | 89,30539 | 22,86   | 0,65 |
| 1_1094 | Atik_Dec2016 | 15/12/2016 | 22,61601 | 89,30546 | 44,196  | 0,72 |
| 1_1095 | Atik_Dec2016 | 15/12/2016 | 22,61587 | 89,30531 | 44,196  | 0,7  |
| 1_1096 | Atik_Dec2016 | 15/12/2016 | 22,61398 | 89,30583 | 21,336  | 0,64 |
| 1_1097 | Atik_Dec2016 | 15/12/2016 | 22,61266 | 89,30634 | 44,196  | 0,6  |
| 1_1098 | Atik_Dec2016 | 15/12/2016 | 22,61102 | 89,30648 | 35,052  | 0,53 |
| 1_1099 | Atik_Dec2016 | 15/12/2016 | 22,60948 | 89,30714 | 33,528  | 0,56 |
| 1_1100 | Atik_Dec2016 | 15/12/2016 | 22,60769 | 89,30756 | 42,672  | 0,69 |
| 1_1101 | Atik_Dec2016 | 15/12/2016 | 22,60545 | 89,30882 | 38,1    | 0,53 |
| 1_1102 | Atik_Dec2016 | 15/12/2016 | 22,60349 | 89,30917 | 33,528  | 0,74 |
| 1_1103 | Atik_Dec2016 | 15/12/2016 | 22,60178 | 89,30933 | 16,764  | 2,22 |
| 1_1104 | Atik_Dec2016 | 15/12/2016 | 22,60191 | 89,30913 | 42,672  | 0,63 |
| 1_1105 | Atik_Dec2016 | 15/12/2016 | 22,6019  | 89,30899 | 17,3736 | 0,75 |
| 1_1106 | Atik_Dec2016 | 15/12/2016 | 22,60046 | 89,30994 | 27,432  | 1,02 |
| 1_1107 | Atik_Dec2016 | 15/12/2016 | 22,59919 | 89,31083 | 21,336  | 0,65 |
| 1_1108 | Atik_Dec2016 | 15/12/2016 | 22,59759 | 89,312   | 15,24   | 1,33 |
| 1_1109 | Atik_Dec2016 | 15/12/2016 | 22,59522 | 89,3125  | 17,3736 | 1,34 |
| 1_1110 | Atik_Dec2016 | 15/12/2016 | 22,59517 | 89,31264 | 15,24   | 1,19 |
| 1_1111 | Atik_Dec2016 | 15/12/2016 | 22,59325 | 89,31368 | 16,764  | 1,2  |
| 1_1112 | Atik_Dec2016 | 15/12/2016 | 22,59027 | 89,31734 | 19,812  | 1,93 |
| 1_1113 | Atik_Dec2016 | 15/12/2016 | 22,58824 | 89,31941 | 13,716  | 2,32 |



|        |              |            |          |          |         |       |
|--------|--------------|------------|----------|----------|---------|-------|
| 1_1114 | Atik_Dec2016 | 15/12/2016 | 22,58827 | 89,31965 | 15,24   | 2,15  |
| 1_1115 | Atik_Dec2016 | 15/12/2016 | 22,58658 | 89,32124 | 17,3736 | 2,39  |
| 1_1116 | Atik_Dec2016 | 16/12/2016 | 22,55175 | 89,09521 | 36,576  | 3,54  |
| 1_1117 | Atik_Dec2016 | 16/12/2016 | 22,55162 | 89,09231 | 36,576  | 4,1   |
| 1_1118 | Atik_Dec2016 | 16/12/2016 | 22,5515  | 89,091   | 36,576  | 3,52  |
| 1_1119 | Atik_Dec2016 | 16/12/2016 | 22,55056 | 89,08974 | 36,576  | 3,6   |
| 1_1120 | Atik_Dec2016 | 16/12/2016 | 22,55086 | 89,08872 | 39,624  | 3,73  |
| 1_1121 | Atik_Dec2016 | 16/12/2016 | 22,54932 | 89,08746 | 42,672  | 3,59  |
| 1_1122 | Atik_Dec2016 | 16/12/2016 | 22,54638 | 89,0845  | 36,576  | 3,5   |
| 1_1123 | Atik_Dec2016 | 16/12/2016 | 22,54507 | 89,08428 | 45,72   | 3,38  |
| 1_1124 | Atik_Dec2016 | 16/12/2016 | 22,54411 | 89,08308 | 36,576  | 3,18  |
| 1_1125 | Atik_Dec2016 | 16/12/2016 | 22,54586 | 89,08089 | 36,576  | 3,14  |
| 1_1126 | Atik_Dec2016 | 16/12/2016 | 22,54889 | 89,07925 | 37,1856 | 3,66  |
| 1_1127 | Atik_Dec2016 | 16/12/2016 | 22,54397 | 89,08552 | 28,956  | 3,42  |
| 1_1128 | Atik_Dec2016 | 16/12/2016 | 22,54249 | 89,08775 | 30,48   | 3,17  |
| 1_1129 | Atik_Dec2016 | 16/12/2016 | 22,53964 | 89,08895 | 48,768  | 3,64  |
| 1_1130 | Atik_Dec2016 | 16/12/2016 | 22,53698 | 89,08857 | 54,864  | 3,63  |
| 1_1131 | Atik_Dec2016 | 16/12/2016 | 22,52995 | 89,08828 | 48,768  | 7,96  |
| 1_1132 | Atik_Dec2016 | 16/12/2016 | 22,52965 | 89,08764 | 48,768  | 7,69  |
| 1_1133 | Atik_Dec2016 | 16/12/2016 | 22,50008 | 89,08932 | 21,336  | 2,04  |
| 1_1134 | Atik_Dec2016 | 16/12/2016 | 22,49994 | 89,08743 | 12,192  | 0,91  |
| 1_1135 | Atik_Dec2016 | 16/12/2016 | 22,4998  | 89,08699 | 9,144   | 0,7   |
| 1_1136 | Atik_Dec2016 | 16/12/2016 | 22,49898 | 89,08456 | 10,668  | 4,15  |
| 1_1137 | Atik_Dec2016 | 16/12/2016 | 22,4987  | 89,08464 | 13,716  | 2,34  |
| 1_1138 | Atik_Dec2016 | 16/12/2016 | 22,4994  | 89,08176 | 10,668  | 2,52  |
| 1_1139 | Atik_Dec2016 | 16/12/2016 | 22,49935 | 89,08162 | 10,668  | 2,08  |
| 1_1140 | Atik_Dec2016 | 16/12/2016 | 22,49782 | 89,07888 | 39,624  | 4,65  |
| 1_1141 | Atik_Dec2016 | 16/12/2016 | 22,4901  | 89,07781 | 36,576  | 4,82  |
| 1_1142 | Atik_Dec2016 | 16/12/2016 | 22,4835  | 89,0806  | 39,624  | 7,22  |
| 1_1143 | Atik_Dec2016 | 16/12/2016 | 22,47596 | 89,07727 | 42,672  | 9,43  |
| 1_1144 | Atik_Dec2016 | 16/12/2016 | 22,47164 | 89,06541 | 18,288  | 4,56  |
| 1_1145 | Atik_Dec2016 | 16/12/2016 | 22,47224 | 89,06539 | 7,9248  | 4,16  |
| 1_1146 | Atik_Dec2016 | 16/12/2016 | 22,47186 | 89,08572 | 51,816  | 8,8   |
| 1_1147 | Atik_Dec2016 | 16/12/2016 | 22,47354 | 89,0828  | 54,864  | 8,93  |
| 1_1148 | Atik_Dec2016 | 16/12/2016 | 22,47252 | 89,07917 | 18,288  | 14,38 |
| 1_1149 | Atik_Dec2016 | 16/12/2016 | 22,47183 | 89,08238 | 24,384  | 9,61  |
| 1_1150 | Atik_Dec2016 | 16/12/2016 | 22,4666  | 89,07891 | 20,4216 | 10,63 |
| 1_1151 | Atik_Dec2016 | 16/12/2016 | 22,46515 | 89,07887 | 21,336  | 3,7   |
| 1_1152 | Atik_Dec2016 | 16/12/2016 | 22,4638  | 89,07851 | 32,004  | 4,05  |
| 1_1153 | Atik_Dec2016 | 16/12/2016 | 22,46224 | 89,07747 | 35,052  | 1,88  |
| 1_1154 | Atik_Dec2016 | 16/12/2016 | 22,46029 | 89,07645 | 33,528  | 1,55  |
| 1_1155 | Atik_Dec2016 | 16/12/2016 | 22,45944 | 89,07626 | 33,528  | 1,71  |
| 1_1156 | Atik_Dec2016 | 16/12/2016 | 22,45798 | 89,07482 | 35,052  | 1,39  |
| 1_1157 | Atik_Dec2016 | 16/12/2016 | 22,27054 | 89,32424 | 57,912  | 4     |
| 1_1158 | Atik_Dec2016 | 17/12/2016 | 22,45275 | 89,27634 | 30,48   | 6,56  |
| 1_1159 | Atik_Dec2016 | 17/12/2016 | 22,45254 | 89,27618 | 30,48   | 7,05  |
| 1_1160 | Atik_Dec2016 | 17/12/2016 | 22,45227 | 89,27515 | 45,72   | 7,28  |

|        |              |            |          |          |         |       |
|--------|--------------|------------|----------|----------|---------|-------|
| 1_1161 | Atik_Dec2016 | 17/12/2016 | 22,45139 | 89,2735  | 24,384  | 8,13  |
| 1_1162 | Atik_Dec2016 | 17/12/2016 | 22,45051 | 89,27359 | 53,34   | 7,93  |
| 1_1163 | Atik_Dec2016 | 17/12/2016 | 22,45069 | 89,27412 | 53,34   | 8,1   |
| 1_1164 | Atik_Dec2016 | 17/12/2016 | 22,44917 | 89,27348 | 51,816  | 7,84  |
| 1_1165 | Atik_Dec2016 | 17/12/2016 | 22,44822 | 89,28033 | 45,72   | 5,46  |
| 1_1166 | Atik_Dec2016 | 17/12/2016 | 22,42359 | 89,28016 | 27,432  | 5,85  |
| 1_1167 | Atik_Dec2016 | 17/12/2016 | 22,42293 | 89,28074 | 30,48   | 7,86  |
| 1_1168 | Atik_Dec2016 | 17/12/2016 | 22,4259  | 89,28236 | 27,432  | 4,18  |
| 1_1169 | Atik_Dec2016 | 17/12/2016 | 22,42145 | 89,27885 | 45,72   | 4,73  |
| 1_1170 | Atik_Dec2016 | 17/12/2016 | 22,41584 | 89,27885 | 35,052  | 4,85  |
| 1_1171 | Atik_Dec2016 | 17/12/2016 | 22,41187 | 89,2789  | 24,384  | 4,17  |
| 1_1172 | Atik_Dec2016 | 17/12/2016 | 22,40656 | 89,28107 | 36,576  | 4,3   |
| 1_1173 | Atik_Dec2016 | 17/12/2016 | 22,40526 | 89,28134 | 24,384  | 4,67  |
| 1_1174 | Atik_Dec2016 | 17/12/2016 | 22,40512 | 89,28146 | 36,576  | 6,4   |
| 1_1175 | Atik_Dec2016 | 17/12/2016 | 22,30601 | 89,29749 | 48,768  | 2,09  |
| 1_1176 | Atik_Dec2016 | 17/12/2016 | 22,30556 | 89,29938 | 54,864  | 2,23  |
| 1_1177 | Atik_Dec2016 | 17/12/2016 | 22,31337 | 89,29398 | 36,576  | 3,72  |
| 1_1178 | Atik_Dec2016 | 17/12/2016 | 22,31384 | 89,29492 | 38,1    | 3,62  |
| 1_1179 | Atik_Dec2016 | 17/12/2016 | 22,31462 | 89,29639 | 56,388  | 3,51  |
| 1_1180 | Atik_Dec2016 | 17/12/2016 | 22,34911 | 89,29087 | 18,288  | 4,8   |
| 1_1181 | Atik_Dec2016 | 17/12/2016 | 22,34978 | 89,2914  | 18,288  | 10,24 |
| 1_1182 | Atik_Dec2016 | 17/12/2016 | 22,49434 | 89,35371 | 48,768  | 6,5   |
| 1_1183 | Atik_Dec2016 | 17/12/2016 | 22,49327 | 89,35429 | 15,24   | 12,38 |
| 1_1184 | Atik_Dec2016 | 17/12/2016 | 22,49178 | 89,35538 | 48,768  | 6,55  |
| 1_1185 | Atik_Dec2016 | 17/12/2016 | 22,49203 | 89,35655 | 50,292  | 6,47  |
| 1_1186 | Atik_Dec2016 | 17/12/2016 | 22,49715 | 89,36045 | 45,72   | 5,55  |
| 1_1187 | Atik_Dec2016 | 17/12/2016 | 22,49932 | 89,36218 | 48,768  | 4,68  |
| 1_1188 | Atik_Dec2016 | 17/12/2016 | 22,49879 | 89,36469 | 41,148  | 4,63  |
| 1_1189 | Atik_Dec2016 | 17/12/2016 | 22,49797 | 89,36841 | 12,192  | 6,68  |
| 1_1190 | Atik_Dec2016 | 17/12/2016 | 22,49751 | 89,36841 | 39,624  | 5,59  |
| 1_1191 | Atik_Dec2016 | 17/12/2016 | 22,49905 | 89,37107 | 45,1104 | 4,7   |
| 1_1192 | Atik_Dec2016 | 17/12/2016 | 22,50057 | 89,37403 | 33,528  | 6,18  |
| 1_1193 | Atik_Dec2016 | 17/12/2016 | 22,50093 | 89,38383 | 38,1    | 5,98  |
| 1_1194 | Atik_Dec2016 | 17/12/2016 | 22,50025 | 89,3844  | 38,1    | 6,39  |
| 1_1195 | Atik_Dec2016 | 17/12/2016 | 22,49882 | 89,38673 | 39,624  | 6,56  |
| 1_1196 | Atik_Dec2016 | 17/12/2016 | 22,49885 | 89,38864 | 54,864  | 7,3   |
| 1_1197 | Atik_Dec2016 | 17/12/2016 | 22,49709 | 89,39181 | 25,908  | 6,99  |
| 1_1198 | Atik_Dec2016 | 17/12/2016 | 22,49396 | 89,39386 | 51,816  | 7,63  |
| 1_1199 | Atik_Dec2016 | 17/12/2016 | 22,49501 | 89,39577 | 25,908  | 7,15  |
| 1_1200 | Atik_Dec2016 | 17/12/2016 | 22,4967  | 89,39622 | 53,34   | 7,15  |
| 1_1201 | Atik_Dec2016 | 17/12/2016 | 22,49894 | 89,39719 | 36,576  | 4,97  |
| 1_1202 | Atik_Dec2016 | 17/12/2016 | 22,49928 | 89,39732 | 21,336  | 5,83  |
| 1_1203 | Atik_Dec2016 | 17/12/2016 | 22,50096 | 89,39915 | 32,004  | 6,51  |
| 1_1204 | Atik_Dec2016 | 17/12/2016 | 22,50117 | 89,40126 | 57,912  | 5,51  |
| 1_1205 | Atik_Dec2016 | 17/12/2016 | 22,50119 | 89,40305 | 27,432  | 5,41  |
| 1_1206 | Atik_Dec2016 | 17/12/2016 | 22,50136 | 89,40488 | 30,48   | 6,28  |
| 1_1207 | Atik_Dec2016 | 17/12/2016 | 22,5036  | 89,40708 | 36,576  | 7,87  |

|        |              |            |          |          |        |       |
|--------|--------------|------------|----------|----------|--------|-------|
| 1_1208 | Atik_Dec2016 | 17/12/2016 | 22,50284 | 89,40754 | 48,768 | 9,28  |
| 1_1209 | Atik_Dec2016 | 17/12/2016 | 22,50009 | 89,40267 | 24,384 | 6,3   |
| 1_1210 | Atik_Dec2016 | 17/12/2016 | 22,49817 | 89,39827 | 27,432 | 6,24  |
| 1_1211 | Atik_Dec2016 | 17/12/2016 | 22,4926  | 89,39499 | 21,336 | 7,08  |
| 1_1212 | Atik_Dec2016 | 17/12/2016 | 22,49717 | 89,38865 | 24,384 | 6,63  |
| 1_1213 | Atik_Dec2016 | 17/12/2016 | 22,49676 | 89,3714  | 57,912 | 6,54  |
| 1_1214 | Atik_Dec2016 | 17/12/2016 | 22,49683 | 89,36581 | 30,48  | 3,88  |
| 1_1215 | Atik_Dec2016 | 17/12/2016 | 22,49456 | 89,36207 | 42,672 | 5,02  |
| 1_1216 | Atik_Dec2016 | 17/12/2016 | 22,48794 | 89,35881 | 48,768 | 6,15  |
| 1_1217 | Atik_Dec2016 | 17/12/2016 | 22,48705 | 89,36082 | 42,672 | 5,75  |
| 1_1218 | Atik_Dec2016 | 17/12/2016 | 22,48714 | 89,36231 | 25,908 | 9,97  |
| 1_1219 | Atik_Dec2016 | 17/12/2016 | 22,48795 | 89,36424 | 42,672 | 5,06  |
| 1_1220 | Atik_Dec2016 | 17/12/2016 | 22,48639 | 89,36498 | 48,768 | 4,47  |
| 1_1221 | Atik_Dec2016 | 17/12/2016 | 22,48487 | 89,36752 | 33,528 | 10,73 |
| 1_1222 | Atik_Dec2016 | 17/12/2016 | 22,48394 | 89,36837 | 27,432 | 6,68  |
| 1_1223 | Atik_Dec2016 | 17/12/2016 | 22,48898 | 89,3581  | 45,72  | 6,38  |
| 1_1224 | Atik_Dec2016 | 17/12/2016 | 22,48589 | 89,35194 | 54,864 | 6,36  |
| 1_1225 | Atik_Dec2016 | 17/12/2016 | 22,48696 | 89,34867 | 53,34  | 5,57  |
| 1_1226 | Atik_Dec2016 | 17/12/2016 | 22,48425 | 89,34748 | 48,768 | 7,05  |
| 1_1227 | Atik_Dec2016 | 17/12/2016 | 22,47622 | 89,34172 | 42,672 | 4,94  |
| 1_1228 | Atik_Dec2016 | 17/12/2016 | 22,4754  | 89,3402  | 45,72  | 6,51  |
| 1_1229 | Atik_Dec2016 | 17/12/2016 | 22,47688 | 89,33891 | 51,816 | 7,73  |
| 1_1230 | Atik_Dec2016 | 17/12/2016 | 22,47426 | 89,33549 | 12,192 | 6,03  |
| 1_1231 | Atik_Dec2016 | 17/12/2016 | 22,47435 | 89,33569 | 19,812 | 10,44 |
| 1_1232 | Atik_Dec2016 | 17/12/2016 | 22,56402 | 89,31645 | 54,864 | 2,35  |
| 1_1233 | Atik_Dec2016 | 17/12/2016 | 22,56435 | 89,31674 | 48,768 | 1,95  |
| 1_1234 | Atik_Dec2016 | 17/12/2016 | 22,56297 | 89,31419 | 47,244 | 2,1   |
| 1_1235 | Atik_Dec2016 | 17/12/2016 | 22,56266 | 89,31305 | 51,816 | 2,35  |
| 1_1236 | Atik_Dec2016 | 17/12/2016 | 22,26262 | 89,31181 | 51,816 | 2,45  |
| 1_1237 | Atik_Dec2016 | 17/12/2016 | 22,56224 | 89,30989 | 51,816 | 2,58  |
| 1_1238 | Atik_Dec2016 | 17/12/2016 | 22,56027 | 89,30755 | 47,244 | 2,06  |
| 1_1239 | Atik_Dec2016 | 17/12/2016 | 22,5594  | 89,30685 | 51,816 | 2,5   |
| 1_1240 | Atik_Dec2016 | 17/12/2016 | 22,55707 | 89,30669 | 39,624 | 4,61  |
| 1_1241 | Atik_Dec2016 | 17/12/2016 | 22,55579 | 89,30648 | 54,864 | 4,62  |
| 1_1242 | Atik_Dec2016 | 17/12/2016 | 22,55384 | 89,30595 | 16,764 | 4,94  |
| 1_1243 | Atik_Dec2016 | 17/12/2016 | 22,55269 | 89,30386 | 33,528 | 3,06  |
| 1_1244 | Atik_Dec2016 | 17/12/2016 | 22,55231 | 89,30411 | 33,528 | 2,96  |
| 1_1245 | Atik_Dec2016 | 17/12/2016 | 22,5526  | 89,30403 | 45,72  | 3,02  |
| 1_1246 | Atik_Dec2016 | 17/12/2016 | 22,55159 | 89,30167 | 27,432 | 3,38  |
| 1_1247 | Atik_Dec2016 | 17/12/2016 | 22,55062 | 89,29961 | 45,72  | 4,13  |
| 1_1248 | Atik_Dec2016 | 17/12/2016 | 22,55045 | 89,29922 | 12,192 | 3,94  |
| 1_1249 | Atik_Dec2016 | 17/12/2016 | 22,55053 | 89,29921 | 21,336 | 4,47  |
| 1_1250 | Atik_Dec2016 | 17/12/2016 | 22,54916 | 89,29691 | 59,436 | 3,32  |
| 1_1251 | Atik_Dec2016 | 17/12/2016 | 22,54347 | 89,29442 | 36,576 | 2,9   |
| 1_1252 | Atik_Dec2016 | 17/12/2016 | 22,54603 | 89,29599 | 54,864 | 5,03  |
| 1_1253 | Atik_Dec2016 | 17/12/2016 | 22,54133 | 89,29385 | 54,864 | 3,76  |
| 1_1254 | Atik_Dec2016 | 17/12/2016 | 22,53979 | 89,29238 | 54,864 | 2,8   |

|        |                     |            |          |          |         |       |
|--------|---------------------|------------|----------|----------|---------|-------|
| 1_1255 | Atik_Dec2016        | 17/12/2016 | 22,53775 | 89,28997 | 54,864  | 2,12  |
| 1_1256 | Atik_Dec2016        | 17/12/2016 | 22,52775 | 89,28873 | 54,864  | 3,15  |
| 1_1257 | Atik_Dec2016        | 17/12/2016 | 22,52235 | 89,28877 | 41,148  | 3,48  |
| 1_1258 | Atik_Dec2016        | 17/12/2016 | 22,51687 | 89,28946 | 48,768  | 3,14  |
| 1_1259 | Atik_Dec2016        | 17/12/2016 | 22,51366 | 89,29034 | 38,1    | 2,95  |
| 1_1260 | Atik_Dec2016        | 17/12/2016 | 22,50928 | 89,29566 | 39,624  | 2,89  |
| 1_1261 | Atik_Dec2016        | 17/12/2016 | 22,50827 | 89,29781 | 51,816  | 3,16  |
| 1_1262 | Atik_Dec2016        | 17/12/2016 | 22,50681 | 89,30041 | 51,816  | 3,24  |
| 1_1263 | Atik_Dec2016        | 17/12/2016 | 22,48496 | 89,3242  | 27,432  | 4,46  |
| 1_1264 | Atik_Dec2016        | 17/12/2016 | 22,4855  | 89,32421 | 19,812  | 5,19  |
| 1_1265 | Atik_Dec2016        | 17/12/2016 | 22,48709 | 89,32468 | 36,576  | 4,76  |
| 1_1266 | Atik_Dec2016        | 17/12/2016 | 22,48926 | 89,32515 | 51,2064 | 5,36  |
| 1_1267 | Atik_Dec2016        | 17/12/2016 | 22,48595 | 89,3407  | 30,48   | 4,47  |
| 1_1268 | Atik_Dec2016        | 17/12/2016 | 22,48344 | 89,3394  | 25,908  | 5,97  |
| 1_1269 | Atik_Dec2016        | 17/12/2016 | 22,48105 | 89,33698 | 39,624  | 3,76  |
| 1_1270 | Atik_Dec2016        | 17/12/2016 | 22,47573 | 89,3364  | 54,864  | 8,14  |
| 1_1271 | Atik_Dec2016        | 18/12/2016 | 22,7073  | 89,47011 | 54,864  | 4,5   |
| 1_1272 | Atik_Dec2016        | 18/12/2016 | 22,7058  | 89,47012 | 53,34   | 4,45  |
| 1_1273 | Atik_Dec2016        | 18/12/2016 | 22,70371 | 89,47417 | 51,816  | 4,42  |
| 1_1274 | Atik_Dec2016        | 18/12/2016 | 22,67556 | 89,47681 | 45,72   | 1,66  |
| 1_1275 | Ayers et al. (2016) | 5/14/2012  | 22,5015  | 89,43368 | 22,9    | 5,56  |
| 1_1276 | Ayers et al. (2016) | 5/14/2012  | 22,5454  | 89,45316 | 36,6    | 4,59  |
| 1_1277 | Ayers et al. (2016) | 5/16/2012  | 22,5254  | 89,43926 | 36,6    | 15,23 |
| 1_1278 | Ayers et al. (2016) | 5/17/2012  | 22,5167  | 89,49593 | 48,8    | 3,3   |
| 1_1279 | Ayers et al. (2016) | 5/17/2012  | 22,5353  | 89,4894  | 25,9    | 5,53  |
| 1_1280 | Ayers et al. (2016) | 5/18/2012  | 22,5284  | 89,48267 | 19,8    | 6,91  |
| 1_1281 | Ayers et al. (2016) | 5/18/2012  | 22,5328  | 89,4846  | 15,2    | 8,77  |
| 1_1282 | Ayers et al. (2016) | 10/16/2012 | 22,548   | 89,48187 | 29      | 7,99  |
| 1_1283 | Ayers et al. (2016) | 5/19/2012  | 22,5468  | 89,48155 | 21,3    | 7,9   |
| 1_1284 | Ayers et al. (2016) | 5/19/2012  | 22,5464  | 89,48309 | 22,9    | 7,3   |
| 1_1285 | Ayers et al. (2016) | 5/19/2012  | 22,5336  | 89,50069 | 41,8    | 5,57  |
| 1_1286 | Ayers et al. (2016) | 5/19/2012  | 22,5336  | 89,50079 | 38,7    | 5,14  |
| 1_1287 | Ayers et al. (2016) | 5/19/2012  | 22,5335  | 89,50103 | 41,1    | 6,87  |
| 1_1288 | Ayers et al. (2016) | 5/19/2012  | 22,5335  | 89,50137 | 42,1    | 5,26  |
| 1_1289 | Ayers et al. (2016) | 5/20/2012  | 22,5087  | 89,49119 | 42,7    | 8,89  |
| 1_1290 | Ayers et al. (2016) | 5/20/2012  | 22,5095  | 89,49123 | 45,7    | 11,55 |
| 1_1291 | Ayers et al. (2016) | 10/17/2012 | 22,5067  | 89,49078 | 22,9    | 9,23  |
| 1_1292 | Ayers et al. (2016) | 10/19/2012 | 22,4704  | 89,45921 | 36,6    | 6,54  |
| 1_1293 | Ayers et al. (2016) | 05/05/2013 | 22,4703  | 89,45929 | 36,6    | 4,3   |
| 1_1294 | Ayers et al. (2016) | 5/21/2012  | 22,4703  | 89,45889 | 44,2    | 3,93  |
| 1_1295 | Ayers et al. (2016) | 5/21/2012  | 22,4788  | 89,46037 | 45,7    | 11,74 |
| 1_1296 | Ayers et al. (2016) | 5/22/2012  | 22,4591  | 89,46317 | 27,4    | 10,74 |
| 1_1297 | Ayers et al. (2016) | 10/19/2012 | 22,4587  | 89,44812 | 42,7    | 5,57  |
| 1_1298 | Ayers et al. (2016) | 5/22/2012  | 22,4589  | 89,44805 | 42,7    | 7,67  |
| 1_1299 | Ayers et al. (2016) | 5/22/2012  | 22,4582  | 89,44549 | 41,1    | 5,67  |
| 1_1300 | Ayers et al. (2016) | 5/22/2012  | 22,4364  | 89,44794 | 45,7    | 4,8   |
| 1_1301 | Ayers et al. (2016) | 5/22/2012  | 22,4332  | 89,45162 | 51,8    | 5,7   |

|        |                     |            |          |          |        |       |
|--------|---------------------|------------|----------|----------|--------|-------|
| 1_1302 | Ayers et al. (2016) | 5/22/2012  | 22,4315  | 89,45149 | 42,7   | 6,75  |
| 1_1303 | Ayers et al. (2016) | 5/23/2012  | 22,4274  | 89,45037 | 42,7   | 7,04  |
| 1_1304 | Ayers et al. (2016) | 10/18/2012 | 22,4278  | 89,4502  | 42,7   | 7,94  |
| 1_1305 | Ayers et al. (2016) | 5/23/2012  | 22,4278  | 89,4502  | 42,7   | 7,94  |
| 1_1306 | Ayers et al. (2016) | 05/07/2013 | 22,5069  | 89,47282 | 33,5   | 3,12  |
| 1_1307 | Ayers et al. (2016) | 10/17/2012 | 22,5074  | 89,47437 | 27,4   | 4     |
| 1_1308 | Ayers et al. (2016) | 10/18/2012 | 22,4362  | 89,44785 | 36,6   | 5,81  |
| 1_1309 | Ayers et al. (2016) | 10/17/2012 | 22,4398  | 89,45284 | 39,6   | 9,01  |
| 1_1310 | BWDB_WetSeason      | 07.11.2012 | 22,73782 | 89,51816 | 55     | 7,16  |
| 1_1311 | BWDB_WetSeason      | 16.07.2012 | 22,83308 | 89,54623 | 60     | 1,639 |
| 1_1312 | BWDB_WetSeason      | 21.10.2012 | 22,83971 | 89,65009 | 27     | 0,852 |
| 1_1313 | Fieldwork_Jan2018   |            | 22,67648 | 89,44041 | 36,576 | 4,29  |
| 1_1314 | Fieldwork_Jan2018   |            | 22,58577 | 89,12293 | 33,528 | 2,1   |
| 1_1315 | Fieldwork_Jan2018   |            | 22,58558 | 89,12256 | 33,528 | 2,027 |
| 1_1316 | Fieldwork_Jan2018   |            | 22,58507 | 89,12175 | 39,624 | 1,4   |
| 1_1317 | Fieldwork_Jan2018   |            | 22,58408 | 89,12141 | 45,72  | 2,987 |
| 1_1318 | Fieldwork_Jan2018   |            | 22,58432 | 89,1207  | 36,576 | 1,794 |
| 1_1319 | Fieldwork_Jan2018   |            | 22,58406 | 89,11989 | 41,148 | 1,865 |
| 1_1320 | Fieldwork_Jan2018   |            | 22,58285 | 89,11798 | 21,336 | 1,779 |
| 1_1321 | Fieldwork_Jan2018   |            | 22,58185 | 89,11707 | 28,956 | 1,855 |
| 1_1322 | Fieldwork_Jan2018   |            | 22,58497 | 89,12146 | 48,768 | 1,832 |
| 1_1323 | Fieldwork_Jan2018   |            | 22,5689  | 89,12389 | 48,768 | 2,23  |
| 1_1324 | Fieldwork_Jan2018   |            | 22,56872 | 89,12377 | 54,864 | 2,21  |
| 1_1325 | Fieldwork_Jan2018   | 18.1.18    | 22,56937 | 89,1225  | 50,292 | 1,783 |
| 1_1326 | Fieldwork_Jan2018   |            | 22,56923 | 89,12072 | 42,672 | 1,73  |
| 1_1327 | Fieldwork_Jan2018   | 18.1.18    | 22,5702  | 89,1192  | 42,672 | 1,475 |
| 1_1328 | Fieldwork_Jan2018   |            | 22,56955 | 89,11729 | 39,624 | 1,56  |
| 1_1329 | Fieldwork_Jan2018   |            | 22,57025 | 89,11776 | 41,148 | 1,78  |
| 1_1330 | Fieldwork_Jan2018   | 18.1.18    | 22,56847 | 89,11569 | 42,672 | 3,642 |
| 1_1331 | Fieldwork_Jan2018   |            | 22,56681 | 89,11434 | 39,624 | 4,42  |
| 1_1332 | Fieldwork_Jan2018   | 18.1.18    | 22,566   | 89,11323 | 25,908 | 4,671 |
| 1_1333 | Fieldwork_Jan2018   | 18.1.18    | 22,56981 | 89,12449 | 50,292 | 1,772 |
| 1_1334 | Fieldwork_Jan2018   | 18.1.18    | 22,56939 | 89,12641 | 48,768 | 1,56  |
| 1_1335 | Fieldwork_Jan2018   | 18.1.18    | 22,56942 | 89,12668 | 15,24  | 1,75  |
| 1_1336 | Fieldwork_Jan2018   |            | 22,56801 | 89,12724 | 18,288 | 2,97  |
| 1_1337 | Fieldwork_Jan2018   |            | 22,56822 | 89,12802 | 22,86  | 2,9   |
| 1_1338 | Fieldwork_Jan2018   |            | 22,56779 | 89,12886 | 30,48  | 3,07  |
| 1_1339 | Fieldwork_Jan2018   |            | 22,56792 | 89,1297  | 18,288 | 3     |
| 1_1340 | Fieldwork_Jan2018   |            | 22,56568 | 89,13095 | 18,288 | 3,25  |
| 1_1341 | Fieldwork_Jan2018   |            | 22,5718  | 89,13465 | 30,48  | 3,099 |
| 1_1342 | Fieldwork_Jan2018   |            | 22,57184 | 89,13514 | 15,24  | 3,264 |
| 1_1343 | Fieldwork_Jan2018   | 17.1.18    | 22,57148 | 89,13572 | 18,288 | 2,79  |
| 1_1344 | Fieldwork_Jan2018   | 17.1.18    | 22,57181 | 89,13737 | 15,24  | 2,392 |
| 1_1345 | Fieldwork_Jan2018   |            | 22,57259 | 89,13738 | 21,336 | 2,218 |
| 1_1346 | Fieldwork_Jan2018   | 17.1.18    | 22,5736  | 89,13654 | 21,336 | 1,667 |
| 1_1347 | Fieldwork_Jan2018   |            | 22,57338 | 89,13565 | 16,764 | 1,689 |
| 1_1348 | Fieldwork_Jan2018   | 17.1.18    | 22,5736  | 89,13577 | 13,716 | 1,4   |

|        |                   |         |          |          |         |        |
|--------|-------------------|---------|----------|----------|---------|--------|
| 1_1349 | Fieldwork_Jan2018 |         | 22,57444 | 89,13598 | 18,288  | 1,333  |
| 1_1350 | Fieldwork_Jan2018 | 17.1.18 | 22,5746  | 89,13255 | 32,004  | 3,815  |
| 1_1351 | Fieldwork_Jan2018 | 17.1.18 | 22,44621 | 89,17705 | 48,768  | 4,687  |
| 1_1352 | Fieldwork_Jan2018 |         | 22,44613 | 89,1773  | 47,244  | 6,05   |
| 1_1353 | Fieldwork_Jan2018 | 17.1.18 | 22,44675 | 89,15595 | 42,672  | 7,503  |
| 1_1354 | Fieldwork_Jan2018 |         | 22,44869 | 89,1581  | 59,7408 | 7,483  |
| 1_1355 | Fieldwork_Jan2018 | 18.1.18 | 22,57003 | 89,13445 | 27,432  | 3,778  |
| 1_1356 | Fieldwork_Jan2018 | 18.1.18 | 22,56779 | 89,12935 | 24,384  | 1,617  |
| 1_1357 | Fieldwork_Jan2018 | 18.1.18 | 22,56776 | 89,12938 | 36,576  | 3,357  |
| 1_1358 | Fieldwork_Jan2018 | 18.1.18 | 22,56743 | 89,12923 | 33,528  | 2,448  |
| 1_1359 | Fieldwork_Jan2018 | 18.1.18 | 22,56994 | 89,11691 | 39,624  | 1,854  |
| 1_1360 | Fieldwork_Jan2018 |         | 22,56569 | 89,11218 | 22,86   | 5,603  |
| 1_1361 | Fieldwork_Jan2018 |         | 22,56692 | 89,11146 | 21,336  | 3,519  |
| 1_1362 | Fieldwork_Jan2018 |         | 22,47352 | 89,08281 | 45,72   | 5,739  |
| 1_1363 | Fieldwork_Jan2018 | 19.1.18 | 22,46601 | 89,07935 | 15,24   | 13,67  |
| 1_1364 | Fieldwork_Jan2018 | 19.1.18 | 22,46363 | 89,07866 | 27,432  | 5,164  |
| 1_1365 | Fieldwork_Jan2018 | 19.1.18 | 22,46378 | 89,07859 | 28,956  | 3,107  |
| 1_1366 | Fieldwork_Jan2018 | 19.1.18 | 22,46238 | 89,07818 | 28,956  | 1,763  |
| 1_1367 | Fieldwork_Jan2018 |         | 22,45976 | 89,07649 | 27,432  | 1,192  |
| 1_1368 | Fieldwork_Jan2018 | 19.1.18 | 22,45943 | 89,07632 | 33,528  | 1,307  |
| 1_1369 | Fieldwork_Jan2018 | 19.1.18 | 22,45753 | 89,07751 | 39,624  | 0,9914 |
| 1_1370 | Fieldwork_Jan2018 | 19.1.18 | 22,45628 | 89,0788  | 33,528  | 1,128  |
| 1_1371 | Fieldwork_Jan2018 | 19.1.18 | 22,4535  | 89,08022 | 29,2608 | 0,686  |
| 1_1372 | Fieldwork_Jan2018 |         | 22,44836 | 89,07699 | 27,432  | 0,8086 |
| 1_1373 | Fieldwork_Jan2018 | 19.1.18 | 22,44801 | 89,07623 | 27,432  | 0,9595 |
| 1_1374 | Fieldwork_Jan2018 | 19.1.18 | 22,44297 | 89,0751  | 39,624  | 2,862  |
| 1_1375 | Fieldwork_Jan2018 | 20.1.18 | 22,45568 | 89,07996 | 38,1    | 0,7003 |
| 1_1376 | Fieldwork_Jan2018 | 20.1.18 | 22,45539 | 89,08008 | 51,816  | 3,836  |
| 1_1377 | Fieldwork_Jan2018 | 20.1.18 | 22,45523 | 89,08024 | 18,288  | 0,807  |
| 1_1378 | Fieldwork_Jan2018 | 20.1.18 | 22,45341 | 89,08117 | 12,192  | 0,7511 |
| 1_1379 | Fieldwork_Jan2018 | 20.1.18 | 22,45154 | 89,08037 | 15,24   | 0,686  |
| 1_1380 | Fieldwork_Jan2018 | 20.1.18 | 22,45021 | 89,07904 | 21,336  | 0,381  |
| 1_1381 | Fieldwork_Jan2018 |         | 22,44767 | 89,07591 | 41,148  | 0,714  |
| 1_1382 | Fieldwork_Jan2018 | 20.1.18 | 22,44632 | 89,07598 | 21,336  | 0,9577 |
| 1_1383 | Fieldwork_Jan2018 |         | 22,446   | 89,07493 | 42,672  | 1,444  |
| 1_1384 | Fieldwork_Jan2018 | 20.1.18 | 22,44335 | 89,07512 | 24,384  | 1,405  |
| 1_1385 | Fieldwork_Jan2018 |         | 22,44322 | 89,07433 | 28,956  | 1,062  |
| 1_1386 | Fieldwork_Jan2018 | 24.1.18 | 22,46665 | 89,07887 | 27,432  | 6,919  |
| 1_1387 | Fieldwork_Jan2018 | 21.1.18 | 22,33031 | 89,10981 | 9,144   | 1,767  |
| 1_1388 | Fieldwork_Jan2018 |         | 22,33071 | 89,11038 | 7,0104  | 1,471  |
| 1_1389 | Fieldwork_Jan2018 | 21.1.18 | 22,33088 | 89,1113  | 6,7056  | 1,68   |
| 1_1390 | Fieldwork_Jan2018 | 25.1.18 | 22,3309  | 89,1121  | 9,144   | 1,536  |
| 1_1391 | Fieldwork_Jan2018 | 21.1.18 | 22,33435 | 89,12898 | 57,912  | 5,209  |
| 1_1392 | Fieldwork_Jan2018 |         | 22,332   | 89,11895 | 57,912  | 5,44   |
| 1_1393 | Fieldwork_Jan2018 | 21.1.18 | 22,32689 | 89,11034 | 9,144   | 1,304  |
| 1_1394 | Fieldwork_Jan2018 | 21.1.18 | 22,32644 | 89,11068 | 8,2296  | 0,509  |
| 1_1395 | Fieldwork_Jan2018 | 22.1.18 | 22,66002 | 89,08813 | 22,86   | 0,673  |

|        |                   |         |          |          |        |        |
|--------|-------------------|---------|----------|----------|--------|--------|
| 1_1396 | Fieldwork_Jan2018 | 22.1.18 | 22,65975 | 89,08621 | 18,288 | 0,6465 |
| 1_1397 | Fieldwork_Jan2018 | 22.1.18 | 22,66026 | 89,08484 | 21,336 | 0,877  |
| 1_1398 | Fieldwork_Jan2018 | 22.1.18 | 22,66048 | 89,08335 | 24,384 | 1,072  |
| 1_1399 | Fieldwork_Jan2018 | 22.1.18 | 22,662   | 89,08022 | 24,384 | 0,686  |
| 1_1400 | Fieldwork_Jan2018 | 22.1.18 | 22,66129 | 89,07592 | 36,576 | 0,732  |
| 1_1401 | Fieldwork_Jan2018 |         | 22,66243 | 89,07312 | 36,576 | 0,828  |
| 1_1402 | Fieldwork_Jan2018 | 22.1.18 | 22,66247 | 89,0731  | 50,292 | 0,712  |
| 1_1403 | Fieldwork_Jan2018 | 22.1.18 | 22,66113 | 89,07094 | 33,528 | 1,181  |
| 1_1404 | Fieldwork_Jan2018 | 22.1.18 | 22,66131 | 89,06684 | 51,816 | 1,219  |
| 1_1405 | Fieldwork_Jan2018 | 22.1.18 | 22,65993 | 89,08893 | 13,716 | 0,589  |
| 1_1406 | Fieldwork_Jan2018 |         | 22,57033 | 89,1326  | 21,336 | 4,969  |
| 1_1407 | Fieldwork_Jan2018 | 24.1.18 | 22,45134 | 89,15625 | 28,956 | 3,049  |
| 1_1408 | Fieldwork_Jan2018 | 24.1.18 | 22,45191 | 89,15644 | 15,24  | 2,062  |
| 1_1409 | Fieldwork_Jan2018 | 24.1.18 | 22,45165 | 89,15688 | 15,24  | 3,41   |
| 1_1410 | Fieldwork_Jan2018 | 24.1.18 | 22,45057 | 89,15682 | 15,24  | 3,745  |
| 1_1411 | Fieldwork_Jan2018 |         | 22,45523 | 89,08012 | 44,196 | 1,903  |
| 1_1412 | Fieldwork_Jan2018 |         | 22,46667 | 89,07957 | 38,1   | 8,943  |
| 1_1413 | Fieldwork_Jan2018 |         | 22,45962 | 89,07629 | 44,196 | 3,223  |
| 1_1414 | Fieldwork_Jan2018 | 27.1.18 | 22,33075 | 89,11208 | 27,432 | 6,791  |
| 1_1415 | Fieldwork_Jan2018 |         | 22,56916 | 89,11543 | 39,624 | 4,18   |
| 1_1416 | Fieldwork_Jan2018 |         | 22,56919 | 89,11535 | 54,864 | 2,549  |
| 1_1417 | Fieldwork_Jan2018 |         | 22,57145 | 89,11106 | 51,816 | 2,158  |
| 1_1418 | Fieldwork_Jan2018 |         | 22,56876 | 89,10893 | 27,432 | 4,493  |
| 1_1419 | Fieldwork_Jan2018 |         | 22,56512 | 89,10846 | 54,864 | 2,89   |
| 1_1420 | Fieldwork_Jan2018 |         | 22,56295 | 89,10668 | 27,432 | 1,97   |
| 1_1421 | Fieldwork_Jan2018 |         | 22,56919 | 89,12782 | 27,432 | 2,86   |
| 1_1422 | Fieldwork_Jan2018 | 27.1.18 | 22,33051 | 89,11268 | 6,096  | 0,362  |
| 1_1423 | Fieldwork_Jan2018 | 29.1.18 | 22,45466 | 89,08008 | 7,62   | 0,879  |
| 1_1424 | Fieldwork_Jan2018 | 29.1.18 | 22,45459 | 89,08163 | 9,144  | 0,952  |
| 1_1425 | Fieldwork_Jan2018 | 29.1.18 | 22,4528  | 89,08183 | 18,288 | 0,728  |
| 1_1426 | Fieldwork_Jan2018 | 29.1.18 | 22,45223 | 89,08108 | 25,908 | 0,696  |
| 1_1427 | Fieldwork_Jan2018 |         | 22,24939 | 89,13417 | 21,336 | 13,77  |
| 1_1428 | Fieldwork_Jan2018 |         | 22,23481 | 89,26032 | 30,48  | 20     |
| 1_1429 | Fieldwork_Jan2018 | 30.1.18 | 22,6629  | 89,05692 | 54,864 | 1,181  |
| 1_1430 | Fieldwork_Jan2018 | 30.1.18 | 22,66239 | 89,05534 | 39,624 | 1,375  |
| 1_1431 | Fieldwork_Jan2018 |         | 22,66034 | 89,04715 | 54,864 | 1,267  |
| 1_1432 | Fieldwork_Jan2018 |         | 22,6601  | 89,04649 | 53,34  | 1,237  |
| 1_1433 | Fieldwork_Jan2018 | 30.1.18 | 22,65991 | 89,04629 | 41,148 | 1,39   |
| 1_1434 | Fieldwork_Jan2018 | 30.1.18 | 22,65979 | 89,04275 | 45,72  | 1,138  |
| 1_1435 | Fieldwork_Jan2018 | 30.1.18 | 22,65323 | 89,04246 | 45,72  | 1,154  |
| 1_1436 | Fieldwork_Jan2018 | 4.2.18  | 22,63882 | 89,32591 | 44,196 | 2,418  |
| 1_1437 | Fieldwork_Jan2018 | 4.2.18  | 22,63895 | 89,32457 | 41,148 | 2,508  |
| 1_1438 | Fieldwork_Jan2018 |         | 22,64014 | 89,32036 | 36,576 | 2,153  |
| 1_1439 | Fieldwork_Jan2018 | 4.2.18  | 22,64055 | 89,31978 | 41,148 | 1,93   |
| 1_1440 | Fieldwork_Jan2018 |         | 22,63952 | 89,3192  | 30,48  | 2,19   |
| 1_1441 | Fieldwork_Jan2018 | 4.2.18  | 22,63979 | 89,3189  | 25,908 | 1,491  |
| 1_1442 | Fieldwork_Jan2018 | 4.2.18  | 22,63953 | 89,31687 | 25,908 | 1,235  |

|        |                   |        |          |          |         |       |
|--------|-------------------|--------|----------|----------|---------|-------|
| 1_1443 | Fieldwork_Jan2018 | 4.2.18 | 22,64059 | 89,31537 | 41,148  | 1,339 |
| 1_1444 | Fieldwork_Jan2018 | 4.2.18 | 22,63813 | 89,3126  | 30,48   | 1,012 |
| 1_1445 | Fieldwork_Jan2018 | 4.2.18 | 22,64179 | 89,33191 | 50,292  | 1,614 |
| 1_1446 | Fieldwork_Jan2018 | 4.2.18 | 22,64307 | 89,34359 | 48,768  | 2,566 |
| 1_1447 | Fieldwork_Jan2018 | 4.2.18 | 22,64208 | 89,34324 | 35,052  | 1,915 |
| 1_1448 | Fieldwork_Jan2018 | 4.2.18 | 22,64302 | 89,34376 | 38,1    | 2,28  |
| 1_1449 | Fieldwork_Jan2018 | 5.2.18 | 22,49345 | 89,30868 | 27,432  | 2,443 |
| 1_1450 | Fieldwork_Jan2018 | 5.2.18 | 22,49529 | 89,31025 | 22,86   | 3,206 |
| 1_1451 | Fieldwork_Jan2018 | 5.2.18 | 22,49542 | 89,31049 | 16,764  | 4,216 |
| 1_1452 | Fieldwork_Jan2018 | 5.2.18 | 22,4955  | 89,31065 | 35,052  | 4,123 |
| 1_1453 | Fieldwork_Jan2018 | 5.2.18 | 22,49288 | 89,31186 | 21,336  | 2,803 |
| 1_1454 | Fieldwork_Jan2018 |        | 22,49695 | 89,31656 | 54,864  | 2,124 |
| 1_1455 | Fieldwork_Jan2018 | 5.2.18 | 22,49825 | 89,31698 | 24,384  | 3,824 |
| 1_1456 | Fieldwork_Jan2018 | 5.2.18 | 22,49837 | 89,31645 | 48,768  | 2,151 |
| 1_1457 | Fieldwork_Jan2018 |        | 22,49029 | 89,32544 | 42,672  | 3,6   |
| 1_1458 | Fieldwork_Jan2018 |        | 22,48925 | 89,32522 | 54,864  | 4,138 |
| 1_1459 | Fieldwork_Jan2018 | 5.2.18 | 22,4891  | 89,32499 | 25,908  | 3,098 |
| 1_1460 | Fieldwork_Jan2018 | 5.2.18 | 22,49323 | 89,32499 | 35,052  | 5,44  |
| 1_1461 | Fieldwork_Jan2018 | 5.2.18 | 22,49785 | 89,32845 | 21,336  | 2,582 |
| 1_1462 | Fieldwork_Jan2018 | 5.2.18 | 22,49731 | 89,32909 | 16,764  | 3,528 |
| 1_1463 | Fieldwork_Jan2018 | 5.2.18 | 22,49879 | 89,32875 | 18,288  | 4,578 |
| 1_1464 | Fieldwork_Jan2018 |        | 22,49943 | 89,32986 | 53,0352 | 2,654 |
| 1_1465 | Fieldwork_Jan2018 | 6.2.18 | 22,49773 | 89,33532 | 45,72   | 3,167 |
| 1_1466 | Fieldwork_Jan2018 | 6.2.18 | 22,49556 | 89,33606 | 31,242  | 4,646 |
| 1_1467 | Fieldwork_Jan2018 |        | 22,49531 | 89,33589 | 30,48   | 3,217 |
| 1_1468 | Fieldwork_Jan2018 | 6.2.18 | 22,49633 | 89,33788 | 19,812  | 5,227 |
| 1_1469 | Fieldwork_Jan2018 |        | 22,49724 | 89,33887 | 51,816  | 2,874 |
| 1_1470 | Fieldwork_Jan2018 | 6.2.18 | 22,4973  | 89,33805 | 9,144   | 4,607 |
| 1_1471 | Fieldwork_Jan2018 | 6.2.18 | 22,49462 | 89,34148 | 24,384  | 4,932 |
| 1_1472 | Fieldwork_Jan2018 |        | 22,49334 | 89,34332 | 56,388  | 3,227 |
| 1_1473 | Fieldwork_Jan2018 | 6.2.18 | 22,49546 | 89,34735 | 48,768  | 3,102 |
| 1_1474 | Fieldwork_Jan2018 |        | 22,49791 | 89,3499  | 44,196  | 3,588 |
| 1_1475 | Fieldwork_Jan2018 | 6.2.18 | 22,49838 | 89,34991 | 35,052  | 3,476 |
| 1_1476 | Fieldwork_Jan2018 | 8.2.18 | 22,60256 | 89,52014 | 13,716  | 2,025 |
| 1_1477 | Fieldwork_Jan2018 | 8.2.18 | 22,60634 | 89,5238  | 16,764  | 7,237 |
| 1_1478 | Fieldwork_Jan2018 | 8.2.18 | 22,60604 | 89,51994 | 24,384  | 3,879 |
| 1_1479 | Fieldwork_Jan2018 | 8.2.18 | 22,6055  | 89,51953 | 25,908  | 4,077 |
| 1_1480 | Fieldwork_Jan2018 | 8.2.18 | 22,60582 | 89,51401 | 33,528  | 3,704 |
| 1_1481 | Fieldwork_Jan2018 | 8.2.18 | 22,60601 | 89,5107  | 30,48   | 3,09  |
| 1_1482 | Fieldwork_Jan2018 |        | 22,60577 | 89,50889 | 42,672  | 2,167 |
| 1_1483 | Fieldwork_Jan2018 | 8.2.18 | 22,60709 | 89,50826 | 16,764  | 2,429 |
| 1_1484 | Fieldwork_Jan2018 | 8.2.18 | 22,60759 | 89,50545 | 21,336  | 3,009 |
| 1_1485 | Fieldwork_Jan2018 | 8.2.18 | 22,60772 | 89,50106 | 22,86   | 2,23  |
| 1_1486 | Fieldwork_Jan2018 | 8.2.18 | 22,60852 | 89,49713 | 35,052  | 1,959 |
| 1_1487 | Fieldwork_Jan2018 | 8.2.18 | 22,60975 | 89,49588 | 36,576  | 2,43  |
| 1_1488 | Fieldwork_Jan2018 | 8.2.18 | 22,61323 | 89,49368 | 33,528  | 2,248 |
| 1_1489 | Fieldwork_Jan2018 | 8.2.18 | 22,61357 | 89,49372 | 25,908  | 3,158 |



|        |                    |            |          |          |         |       |
|--------|--------------------|------------|----------|----------|---------|-------|
| 1_1490 | Fieldwork_Jan2018  | 8.2.18     | 22,61725 | 89,49113 | 33,528  | 2,789 |
| 1_1491 | Fieldwork_july2017 | 22/07/2017 | 22,5285  | 89,14809 | 15,24   | 6,78  |
| 1_1492 | Fieldwork_july2017 | 25/07/2017 | 22,51468 | 89,16297 | 39,624  | 3,23  |
| 1_1493 | Fieldwork_july2017 | 26/07/2017 | 22,54493 | 89,15272 | 15,24   | 3     |
| 1_1494 | Fieldwork_july2017 |            | 22,67963 | 89,50446 | 9,144   | 0,65  |
| 1_1495 | Fieldwork_july2017 |            | 22,67963 | 89,50446 | 12,192  | 1,52  |
| 1_1496 | Fieldwork_july2017 |            | 22,67963 | 89,50446 | 39,624  | 3,42  |
| 1_1497 | Fieldwork_july2017 |            | 22,67963 | 89,50446 | 6,096   | 0,59  |
| 1_1498 | Fieldwork_july2017 |            | 22,68108 | 89,50499 | 10,668  | 4,61  |
| 1_1499 | Fieldwork_july2017 |            | 22,68108 | 89,50499 | 16,764  | 5,28  |
| 1_1500 | Fieldwork_july2017 |            | 22,68108 | 89,50499 | 39,624  | 3,34  |
| 1_1501 | Fieldwork_july2017 |            | 22,67786 | 89,5048  | 11,2776 | 2,14  |
| 1_1502 | Fieldwork_july2017 |            | 22,67786 | 89,5048  | 23,7744 | 4,43  |
| 1_1503 | Fieldwork_july2017 |            | 22,67786 | 89,5048  | 39,624  | 3,07  |
| 1_1504 | Fieldwork_Jan2017  | 07/01/2017 | 22,62096 | 89,42718 | 35,052  | 2,875 |
| 1_1505 | Fieldwork_Jan2017  | 07/01/2017 | 22,62023 | 89,42833 | 36,576  | 2,424 |
| 1_1506 | Fieldwork_Jan2017  | 07/01/2017 | 22,62182 | 89,42601 | 45,72   | 3,647 |
| 1_1507 | Fieldwork_Jan2017  | 07/01/2017 | 22,62104 | 89,42586 | 45,72   | 3,836 |
| 1_1508 | Fieldwork_Jan2017  | 07/01/2017 | 22,616   | 89,4196  | 45,72   | 4,946 |
| 1_1509 | Fieldwork_Jan2017  | 07/01/2017 | 22,61643 | 89,42182 | 48,768  | 3,130 |
| 1_1510 | Fieldwork_Jan2017  | 07/01/2017 | 22,61583 | 89,42052 | 39,624  | 4,696 |
| 1_1511 | Fieldwork_Jan2017  | 07/01/2017 | 22,61473 | 89,42185 | 35,052  | 4,284 |
| 1_1512 | Fieldwork_Jan2017  | 07/01/2017 | 22,60765 | 89,4307  | 36,576  | 2,211 |
| 1_1513 | Fieldwork_Jan2017  | 09/01/2017 | 22,6795  | 89,50346 | 12,192  | 2,020 |
| 1_1514 | Fieldwork_Jan2017  | 09/01/2017 | 22,6792  | 89,50225 | 12,192  | 4,220 |
| 1_1515 | Fieldwork_Jan2017  | 09/01/2017 | 22,67872 | 89,50212 | 16,764  | 4,463 |
| 1_1516 | Fieldwork_Jan2017  | 09/01/2017 | 22,67893 | 89,50028 | 12,8016 | 2,222 |
| 1_1517 | Fieldwork_Jan2017  | 09/01/2017 | 22,67917 | 89,50054 | 13,716  | 4,322 |
| 1_1518 | Fieldwork_Jan2017  | 09/01/2017 | 22,67833 | 89,49965 | 16,764  | 4,651 |
| 1_1519 | Fieldwork_Jan2017  | 09/01/2017 | 22,67862 | 89,49973 | 16,764  | 4,719 |
| 1_1520 | Fieldwork_Jan2017  | 09/01/2017 | 22,67868 | 89,49828 | 24,384  | 6,666 |
| 1_1521 | Fieldwork_Jan2017  | 09/01/2017 | 22,67666 | 89,49421 | 24,384  | 6,344 |
| 1_1522 | Fieldwork_Jan2017  | 09/01/2017 | 22,68947 | 89,46287 | 42,672  | 5,285 |
| 1_1523 | Fieldwork_Jan2017  | 09/01/2017 | 22,68892 | 89,46044 | 35,052  | 4,312 |
| 1_1524 | Fieldwork_Jan2017  | 10/01/2017 | 22,64098 | 89,42126 | 18,288  | 5,660 |
| 1_1525 | Fieldwork_Jan2017  | 16/01/2017 | 22,5424  | 89,15316 | 5,2     | 0,827 |
| 1_1526 | Fieldwork_Jan2017  | 16/01/2017 | 22,54279 | 89,15235 | 13,716  | 0,777 |
| 1_1527 | Fieldwork_Jan2017  | 16/01/2017 | 22,5432  | 89,15227 | 13,716  | 1,137 |
| 1_1528 | Fieldwork_Jan2017  | 16/01/2017 | 22,54391 | 89,15248 | 13,716  | 1,340 |
| 1_1529 | Fieldwork_Jan2017  | 16/01/2017 | 22,54387 | 89,15315 | 19,812  | 2,726 |
| 1_1530 | Fieldwork_Jan2017  | 16/01/2017 | 22,54376 | 89,15289 | 16,764  | 0,630 |
| 1_1531 | Fieldwork_Jan2017  | 16/01/2017 | 22,54432 | 89,15267 | 22,86   | 1,402 |
| 1_1532 | Fieldwork_Jan2017  | 16/01/2017 | 22,5448  | 89,15266 | 15,24   | 2,523 |
| 1_1533 | Fieldwork_Jan2017  | 16/01/2017 | 22,54506 | 89,15258 | 13,716  | 2,607 |
| 1_1534 | Fieldwork_Jan2017  | 16/01/2017 | 22,5449  | 89,1528  | 13,716  | 2,536 |
| 1_1535 | Fieldwork_Jan2017  | 16/01/2017 | 22,54515 | 89,15288 | 19,812  | 2,747 |
| 1_1536 | Fieldwork_Jan2017  | 16/01/2017 | 22,54489 | 89,15298 | 16,764  | 2,909 |

|        |                   |            |          |          |         |       |
|--------|-------------------|------------|----------|----------|---------|-------|
| 1_1537 | Fieldwork_Jan2017 | 16/01/2017 | 22,54573 | 89,15205 | 21,336  | 4,066 |
| 1_1538 | Fieldwork_Jan2017 | 16/01/2017 | 22,54795 | 89,15238 | 16,764  | 6,826 |
| 1_1539 | Fieldwork_Jan2017 | 16/01/2017 | 22,54769 | 89,15131 | 16,764  | 8,420 |
| 1_1540 | Fieldwork_Jan2017 | 16/01/2017 | 22,54319 | 89,15158 | 16,764  | 1,053 |
| 1_1541 | Fieldwork_Jan2017 | 16/01/2017 | 22,54309 | 89,15192 | 38,1    | 1,269 |
| 1_1542 | Fieldwork_Jan2017 | 16/01/2017 | 22,5424  | 89,15351 | 12,192  | 2,462 |
| 1_1543 | Fieldwork_Jan2017 | 16/01/2017 | 22,54231 | 89,15352 | 12,192  | 2,385 |
| 1_1544 | Fieldwork_Jan2017 | 16/01/2017 | 22,54212 | 89,15335 | 12,192  | 1,609 |
| 1_1545 | Fieldwork_Jan2017 | 16/01/2017 | 22,54211 | 89,1535  | 13,716  | 2,218 |
| 1_1546 | Fieldwork_Jan2017 | 16/01/2017 | 22,54185 | 89,15329 | 15,24   | 2,001 |
| 1_1547 | Fieldwork_Jan2017 | 16/01/2017 | 22,54186 | 89,15336 | 9,144   | 2,273 |
| 1_1548 | Fieldwork_Jan2017 | 16/01/2017 | 22,54204 | 89,15343 | 13,716  | 2,956 |
| 1_1549 | Fieldwork_Jan2017 | 16/01/2017 | 22,54215 | 89,15298 | 13,1064 | 1,219 |
| 1_1550 | Fieldwork_Jan2017 | 16/01/2017 | 22,54204 | 89,15293 | 12,192  | 1,373 |
| 1_1551 | Fieldwork_Jan2017 | 16/01/2017 | 22,54204 | 89,15265 | 13,716  | 0,871 |
| 1_1552 | Fieldwork_Jan2017 | 16/01/2017 | 22,54196 | 89,15231 | 16,764  | 0,681 |
| 1_1553 | Fieldwork_Jan2017 | 16/01/2017 | 22,54221 | 89,1528  | 13,716  | 0,939 |
| 1_1554 | Fieldwork_Jan2017 | 16/01/2017 | 22,54261 | 89,1539  | 15,24   | 1,514 |
| 1_1555 | Fieldwork_Jan2017 | 17/01/2017 | 22,54273 | 89,15442 | 18,288  | 1,359 |
| 1_1556 | Fieldwork_Jan2017 | 17/01/2017 | 22,54239 | 89,15521 | 18,288  | 1,922 |
| 1_1557 | Fieldwork_Jan2017 | 17/01/2017 | 22,54211 | 89,15623 | 21,336  | 3,114 |
| 1_1558 | Fieldwork_Jan2017 | 17/01/2017 | 22,54214 | 89,1572  | 42,672  | 3,057 |
| 1_1559 | Fieldwork_Jan2017 | 17/01/2017 | 22,54199 | 89,15764 | 44,196  | 2,985 |
| 1_1560 | Fieldwork_Jan2017 | 17/01/2017 | 22,54206 | 89,15776 | 16,764  | 2,970 |
| 1_1561 | Fieldwork_Jan2017 | 17/01/2017 | 22,54194 | 89,15792 | 10,668  | 4,606 |
| 1_1562 | Fieldwork_Jan2017 | 17/01/2017 | 22,54317 | 89,15041 | 21,336  | 0,828 |
| 1_1563 | Fieldwork_Jan2017 | 17/01/2017 | 22,54297 | 89,15025 | 18,288  | 0,927 |
| 1_1564 | Fieldwork_Jan2017 | 17/01/2017 | 22,54299 | 89,15054 | 15,24   | 1,020 |
| 1_1565 | Fieldwork_Jan2017 | 17/01/2017 | 22,54228 | 89,15067 | 18,288  | 0,783 |
| 1_1566 | Fieldwork_Jan2017 | 17/01/2017 | 22,54202 | 89,15091 | 27,432  | 0,938 |
| 1_1567 | Fieldwork_Jan2017 | 17/01/2017 | 22,54196 | 89,15094 | 27,432  | 1,054 |
| 1_1568 | Fieldwork_Jan2017 | 17/01/2017 | 22,54195 | 89,15095 | 30,48   | 1,048 |
| 1_1569 | Fieldwork_Jan2017 | 17/01/2017 | 22,54218 | 89,15014 | 13,4112 | 0,765 |
| 1_1570 | Fieldwork_Jan2017 | 17/01/2017 | 22,54206 | 89,14961 | 13,716  | 0,818 |
| 1_1571 | Fieldwork_Jan2017 | 17/01/2017 | 22,54191 | 89,14958 | 13,716  | 0,923 |
| 1_1572 | Fieldwork_Jan2017 | 17/01/2017 | 22,54178 | 89,15031 | 15,24   | 0,739 |
| 1_1573 | Fieldwork_Jan2017 | 17/01/2017 | 22,54178 | 89,15031 | 16,764  | 0,887 |
| 1_1574 | Fieldwork_Jan2017 | 17/01/2017 | 22,54177 | 89,1504  | 16,764  | 0,887 |
| 1_1575 | Fieldwork_Jan2017 | 19/01/2017 | 22,54141 | 89,15181 | 13,716  | 1,094 |
| 1_1576 | Fieldwork_Jan2017 | 19/01/2017 | 22,54142 | 89,15175 | 15,24   | 0,674 |
| 1_1577 | Fieldwork_Jan2017 | 19/01/2017 | 22,54152 | 89,15158 | 13,716  | 0,782 |
| 1_1578 | Fieldwork_Jan2017 | 19/01/2017 | 22,54129 | 89,15238 | 18,288  | 0,774 |
| 1_1579 | Fieldwork_Jan2017 | 19/01/2017 | 22,54117 | 89,15275 | 13,716  | 0,634 |
| 1_1580 | Fieldwork_Jan2017 | 19/01/2017 | 22,54089 | 89,15222 | 18,288  | 0,647 |
| 1_1581 | Fieldwork_Jan2017 | 19/01/2017 | 22,54126 | 89,15181 | 10,668  | 0,651 |
| 1_1582 | Fieldwork_Jan2017 | 19/01/2017 | 22,54116 | 89,15176 | 16,764  | 0,654 |
| 1_1583 | Fieldwork_Jan2017 | 19/01/2017 | 22,5411  | 89,15176 | 25,6032 | 0,644 |

|        |                   |            |          |          |         |       |
|--------|-------------------|------------|----------|----------|---------|-------|
| 1_1584 | Fieldwork_Jan2017 | 19/01/2017 | 22,54014 | 89,15155 | 12,192  | 0,802 |
| 1_1585 | Fieldwork_Jan2017 | 19/01/2017 | 22,54018 | 89,1513  | 24,384  | 0,792 |
| 1_1586 | Fieldwork_Jan2017 | 19/01/2017 | 22,54033 | 89,15104 | 12,192  | 0,990 |
| 1_1587 | Fieldwork_Jan2017 | 19/01/2017 | 22,54058 | 89,15116 | 24,384  | 0,621 |
| 1_1588 | Fieldwork_Jan2017 | 19/01/2017 | 22,54058 | 89,15069 | 10,668  | 0,662 |
| 1_1589 | Fieldwork_Jan2017 | 19/01/2017 | 22,5406  | 89,1506  | 12,8016 | 1,064 |
| 1_1590 | Fieldwork_Jan2017 | 19/01/2017 | 22,54067 | 89,1502  | 18,288  | 0,759 |
| 1_1591 | Fieldwork_Jan2017 | 19/01/2017 | 22,54064 | 89,1502  | 21,336  | 0,752 |
| 1_1592 | Fieldwork_Jan2017 | 19/01/2017 | 22,54057 | 89,15017 | 24,384  | 0,738 |
| 1_1593 | Fieldwork_Jan2017 | 19/01/2017 | 22,54051 | 89,15016 | 22,86   | 0,709 |
| 1_1594 | Fieldwork_Jan2017 | 19/01/2017 | 22,53994 | 89,15026 | 21,336  | 0,738 |
| 1_1595 | Fieldwork_Jan2017 | 19/01/2017 | 22,53996 | 89,15009 | 18,288  | 0,950 |
| 1_1596 | Fieldwork_Jan2017 | 19/01/2017 | 22,53931 | 89,15005 | 15,24   | 2,665 |
| 1_1597 | Fieldwork_Jan2017 | 19/01/2017 | 22,53929 | 89,15017 | 13,716  | 0,961 |
| 1_1598 | Fieldwork_Jan2017 | 19/01/2017 | 22,53916 | 89,15051 | 7,62    | 3,234 |
| 1_1599 | Fieldwork_Jan2017 | 21/01/2017 | 22,67749 | 89,50382 | 42,672  | 6,871 |
| 1_1600 | Fieldwork_Jan2017 | 21/01/2017 | 22,68    | 89,50448 | 19,812  | 3,633 |
| 1_1601 | Fieldwork_Jan2017 | 21/01/2017 | 22,67989 | 89,50422 | 15,24   | 2,736 |
| 1_1602 | Fieldwork_Jan2017 | 21/01/2017 | 22,67957 | 89,50404 | 21,9456 | 2,954 |
| 1_1603 | Fieldwork_Jan2017 | 21/01/2017 | 22,67914 | 89,50466 | 13,716  | 3,580 |
| 1_1604 | Fieldwork_Jan2017 | 21/01/2017 | 22,67973 | 89,50495 | 13,716  | 1,895 |
| 1_1605 | Fieldwork_Jan2017 | 21/01/2017 | 22,67984 | 89,50521 | 17,3736 | 3,066 |
| 1_1606 | Fieldwork_Jan2017 | 21/01/2017 | 22,67945 | 89,50596 | 16,764  | 2,605 |
| 1_1607 | Fieldwork_Jan2017 | 21/01/2017 | 22,67985 | 89,50633 | 17,3736 | 3,311 |
| 1_1608 | Fieldwork_Jan2017 | 21/01/2017 | 22,67952 | 89,50623 | 13,716  | 4,313 |
| 1_1609 | Fieldwork_Jan2017 | 21/01/2017 | 22,67947 | 89,50718 | 16,764  | 3,113 |
| 1_1610 | Fieldwork_Jan2017 | 21/01/2017 | 22,67969 | 89,50839 | 15,8496 | 4,104 |
| 1_1611 | Fieldwork_Jan2017 | 21/01/2017 | 22,67965 | 89,50454 | 5,2     | 0,602 |
| 1_1612 | Fieldwork_Jan2017 | 22/01/2017 | 22,62003 | 89,42494 | 30,48   | 3,867 |
| 1_1613 | Fieldwork_Jan2017 | 22/01/2017 | 22,61948 | 89,42494 | 44,196  | 3,340 |
| 1_1614 | Fieldwork_Jan2017 | 22/01/2017 | 22,6192  | 89,42439 | 37,1856 | 4,303 |
| 1_1615 | Fieldwork_Jan2017 | 22/01/2017 | 22,61879 | 89,42544 | 41,148  | 2,346 |
| 1_1616 | Fieldwork_Jan2017 | 22/01/2017 | 22,61824 | 89,42527 | 44,196  | 1,858 |
| 1_1617 | Fieldwork_Jan2017 | 22/01/2017 | 22,61782 | 89,42511 | 48,768  | 2,52  |
| 1_1618 | Fieldwork_Jan2017 | 22/01/2017 | 22,61746 | 89,42468 | 47,244  | 3,208 |
| 1_1619 | Fieldwork_Jan2017 | 22/01/2017 | 22,61841 | 89,42414 | 42,672  | 1,68  |
| 1_1620 | Fieldwork_Jan2017 | 22/01/2017 | 22,6188  | 89,42449 | 39,624  | 2,172 |
| 1_1621 | Fieldwork_Jan2017 | 22/01/2017 | 22,61802 | 89,423   | 42,672  | 2,507 |
| 1_1622 | Fieldwork_Jan2017 | 22/01/2017 | 22,61716 | 89,42339 | 38,1    | 1,915 |
| 1_1623 | Fieldwork_Jan2017 | 22/01/2017 | 22,61704 | 89,4236  | 42,672  | 1,912 |
| 1_1624 | Fieldwork_Jan2017 | 22/01/2017 | 22,61707 | 89,42237 | 41,148  | 2,43  |
| 1_1625 | Fieldwork_Jan2017 | 22/01/2017 | 22,6166  | 89,4221  | 44,196  | 2,38  |
| 1_1626 | Fieldwork_Jan2017 | 22/01/2017 | 22,62487 | 89,42415 | 38,1    | 4,089 |
| 1_1627 | Fieldwork_Jan2017 | 22/01/2017 | 22,62566 | 89,42553 | 48,768  | 4,204 |
| 1_1628 | Fieldwork_Jan2017 | 22/01/2017 | 22,62642 | 89,42423 | 50,292  | 4,26  |
| 1_1629 | Fieldwork_Jan2017 | 22/01/2017 | 22,62718 | 89,42325 | 41,148  | 3,641 |
| 1_1630 | Fieldwork_Jan2017 | 22/01/2017 | 22,62725 | 89,42256 | 45,72   | 4,24  |

|        |                   |            |          |          |        |       |
|--------|-------------------|------------|----------|----------|--------|-------|
| 1_1631 | Fieldwork_Jan2017 | 22/01/2017 | 22,6275  | 89,42248 | 50,292 | 3,725 |
| 1_1632 | Fieldwork_Jan2017 | 23/01/2017 | 22,62101 | 89,4253  | 45,72  | 3,85  |
| 1_1633 | Fieldwork_Jan2017 | 23/01/2017 | 22,62067 | 89,42581 | 48,768 | 3,494 |
| 1_1634 | Fieldwork_Jan2017 | 23/01/2017 | 22,62061 | 89,42647 | 38,1   | 2,511 |
| 1_1635 | Fieldwork_Jan2017 | 23/01/2017 | 22,62106 | 89,42593 | 45,72  | 3,85  |
| 1_1636 | Fieldwork_Jan2017 | 23/01/2017 | 22,62107 | 89,42611 | 39,624 | 3,66  |
| 1_1637 | Fieldwork_Jan2017 | 23/01/2017 | 22,62141 | 89,42626 | 45,72  | 3,14  |
| 1_1638 | Fieldwork_Jan2017 | 23/01/2017 | 22,62132 | 89,42653 | 41,148 | 2,94  |
| 1_1639 | Fieldwork_Jan2017 | 23/01/2017 | 22,6218  | 89,42607 | 42,672 | 3,34  |
| 1_1640 | Fieldwork_Jan2017 | 23/01/2017 | 22,62205 | 89,42704 | 36,576 | 3,25  |
| 1_1641 | Fieldwork_Jan2017 | 23/01/2017 | 22,62204 | 89,42776 | 42,672 | 3,43  |
| 1_1642 | Fieldwork_Jan2017 | 23/01/2017 | 22,62103 | 89,42722 | 36,576 | 2,605 |
| 1_1643 | Fieldwork_Jan2017 | 23/01/2017 | 22,62034 | 89,42836 | 36,576 | 2,12  |
| 1_1644 | Fieldwork_Jan2017 | 24/01/2017 | 22,5328  | 89,15138 | 19,812 | 4,023 |
| 1_1645 | Fieldwork_Jan2017 | 24/01/2017 | 22,53204 | 89,15347 | 22,86  | 1,965 |
| 1_1646 | Fieldwork_Jan2017 | 24/01/2017 | 22,53329 | 89,14887 | 24,384 | 10,87 |
| 1_1647 | Fieldwork_Jan2017 | 24/01/2017 | 22,53309 | 89,15123 | 13,716 | 2,152 |
| 1_1648 | Fieldwork_Jan2017 | 24/01/2017 | 22,53334 | 89,15147 | 13,716 | 2,45  |
| 1_1649 | Fieldwork_Jan2017 | 24/01/2017 | 22,53384 | 89,15232 | 16,764 | 1,41  |
| 1_1650 | Fieldwork_Jan2017 | 24/01/2017 | 22,53416 | 89,15153 | 18,288 | 1,35  |
| 1_1651 | Fieldwork_Jan2017 | 24/01/2017 | 22,53473 | 89,15146 | 10,668 | 1,05  |
| 1_1652 | Fieldwork_Jan2017 | 24/01/2017 | 22,5348  | 89,1514  | 10,668 | 1,045 |
| 1_1653 | Fieldwork_Jan2017 | 24/01/2017 | 22,5351  | 89,15148 | 16,764 | 0,994 |
| 1_1654 | Fieldwork_Jan2017 | 24/01/2017 | 22,53496 | 89,15238 | 18,288 | 0,775 |
| 1_1655 | Fieldwork_Jan2017 | 24/01/2017 | 22,53599 | 89,15218 | 13,716 | 0,505 |
| 1_1656 | Fieldwork_Jan2017 | 24/01/2017 | 22,53615 | 89,15279 | 10,668 | 0,72  |
| 1_1657 | Fieldwork_Jan2017 | 24/01/2017 | 22,53622 | 89,15303 | 22,86  | 0,89  |
| 1_1658 | Fieldwork_Jan2017 | 24/01/2017 | 22,53672 | 89,1528  | 13,716 | 0,755 |
| 1_1659 | Fieldwork_Jan2017 | 24/01/2017 | 22,53688 | 89,15262 | 13,716 | 0,885 |
| 1_1660 | Fieldwork_Jan2017 | 24/01/2017 | 22,53691 | 89,15247 | 12,192 | 0,775 |
| 1_1661 | Fieldwork_Jan2017 | 24/01/2017 | 22,53712 | 89,15256 | 13,716 | 0,848 |
| 1_1662 | Fieldwork_Jan2017 | 24/01/2017 | 22,53734 | 89,15256 | 15,24  | 0,862 |
| 1_1663 | Fieldwork_Jan2017 | 24/01/2017 | 22,53754 | 89,15291 | 15,24  | 0,698 |
| 1_1664 | Fieldwork_Jan2017 | 24/01/2017 | 22,53725 | 89,15306 | 12,192 | 0,711 |
| 1_1665 | Fieldwork_Jan2017 | 24/01/2017 | 22,53783 | 89,15267 | 13,716 | 0,968 |
| 1_1666 | Fieldwork_Jan2017 | 24/01/2017 | 22,53797 | 89,15264 | 12,192 | 1,244 |
| 1_1667 | Fieldwork_Jan2017 | 24/01/2017 | 22,53789 | 89,15292 | 18,288 | 0,827 |
| 1_1668 | Fieldwork_Jan2017 | 24/01/2017 | 22,53782 | 89,1521  | 12,192 | 0,802 |
| 1_1669 | Fieldwork_Jan2017 | 24/01/2017 | 22,53784 | 89,15201 | 12,192 | 0,87  |
| 1_1670 | Fieldwork_Jan2017 |            | 22,54623 | 89,15291 | 12,192 | 7,66  |
| 1_1671 | Fieldwork_Jan2017 |            | 22,54623 | 89,15291 | 24,384 | 6,458 |
| 1_1672 | Fieldwork_Jan2017 |            | 22,54623 | 89,15291 | 36,576 | 7,34  |
| 1_1673 | Fieldwork_Jan2017 |            | 22,54536 | 89,15277 | 13,716 | 6,116 |
| 1_1674 | Fieldwork_Jan2017 |            | 22,54536 | 89,15277 | 45,72  | 7,66  |
| 1_1675 | Fieldwork_Jan2017 |            | 22,54483 | 89,15273 | 12,192 | 5,735 |
| 1_1676 | Fieldwork_Jan2017 |            | 22,54483 | 89,15273 | 24,384 | 5,43  |
| 1_1677 | Fieldwork_Jan2017 |            | 22,54483 | 89,15273 | 36,576 | 7,708 |

|        |                   |            |          |          |         |       |
|--------|-------------------|------------|----------|----------|---------|-------|
| 1_1678 | Fieldwork_Jan2017 | 30/01/2017 | 22,54372 | 89,15282 | 12,192  | 1,384 |
| 1_1679 | Fieldwork_Jan2017 |            | 22,54176 | 89,15205 | 7,62    | 1,034 |
| 1_1680 | Fieldwork_Jan2017 |            | 22,54176 | 89,15205 | 24,384  | 1,02  |
| 1_1681 | Fieldwork_Jan2017 |            | 22,54176 | 89,15205 | 36,576  | 3,793 |
| 1_1682 | Fieldwork_Jan2017 | 30/01/2017 | 22,54009 | 89,15189 | 10,668  | 2,478 |
| 1_1683 | Fieldwork_Jan2017 | 30/01/2017 | 22,54006 | 89,15188 | 13,716  | 1,451 |
| 1_1684 | Fieldwork_Jan2017 | 30/01/2017 | 22,53934 | 89,15168 | 13,716  | 1,074 |
| 1_1685 | Fieldwork_Jan2017 | 04/02/2017 | 22,5392  | 89,15164 | 7,62    | 6,24  |
| 1_1686 | Fieldwork_Jan2017 | 04/02/2017 | 22,5392  | 89,15164 | 24,384  | 1,64  |
| 1_1687 | Fieldwork_Jan2017 | 04/02/2017 | 22,5392  | 89,15164 | 36,576  | 4,036 |
| 1_1688 | Fieldwork_Jan2017 | 30/01/2017 | 22,53832 | 89,15229 | 9,144   | 6,558 |
| 1_1689 | Fieldwork_Jan2017 | 30/01/2017 | 22,53695 | 89,15234 | 9,144   | 0,95  |
| 1_1690 | Fieldwork_Jan2017 | 30/01/2017 | 22,53494 | 89,15172 | 6,096   | 0,898 |
| 1_1691 | Fieldwork_Jan2017 |            | 22,53494 | 89,15172 | 22,86   | 4,161 |
| 1_1692 | Fieldwork_Jan2017 | 31/01/2017 | 22,5443  | 89,15255 | 33,528  | 5,633 |
| 1_1693 | Fieldwork_Jan2017 | 01/02/2017 | 22,54207 | 89,15207 | 13,716  | 0,892 |
| 1_1694 | Fieldwork_Jan2017 |            | 22,53875 | 89,15211 | 24,384  | 1,346 |
| 1_1695 | Fieldwork_Jan2017 |            | 22,53875 | 89,15211 | 36,576  | 4,645 |
| 1_1696 | Fieldwork_Jan2017 |            | 22,5327  | 89,15093 | 9,144   | 21,26 |
| 1_1697 | Fieldwork_Jan2017 |            | 22,5327  | 89,15093 | 13,716  | 7,753 |
| 1_1698 | Fieldwork_Jan2017 | 03/02/2017 | 22,5347  | 89,15234 | 18,288  | 1,07  |
| 1_1699 | Fieldwork_Jan2017 | 03/02/2017 | 22,53701 | 89,15179 | 13,716  | 1,23  |
| 1_1700 | Fieldwork_Jan2017 | 03/02/2017 | 22,53733 | 89,15202 | 9,144   | 1,099 |
| 1_1701 | Fieldwork_Jan2017 | 03/02/2017 | 22,53924 | 89,15277 | 16,764  | 1,042 |
| 1_1702 | Fieldwork_Jan2017 | 03/02/2017 | 22,53949 | 89,15131 | 13,716  | 1,326 |
| 1_1703 | Fieldwork_Jan2017 | 03/02/2017 | 22,54011 | 89,15205 | 16,764  | 1,143 |
| 1_1704 | Fieldwork_Jan2017 | 03/02/2017 | 22,54176 | 89,15226 | 25,908  | 0,841 |
| 1_1705 | Fieldwork_Jan2017 | 03/02/2017 | 22,54295 | 89,15268 | 19,812  | 2,137 |
| 1_1706 | Fieldwork_Jan2017 | 03/02/2017 | 22,54278 | 89,15324 | 13,716  | 1,52  |
| 1_1707 | Fieldwork_Jan2017 | 03/02/2017 | 22,54292 | 89,15282 | 16,764  | 1,966 |
| 1_1708 | Fieldwork_Jan2017 | 04/02/2017 | 22,53144 | 89,15012 | 15,24   | 5,555 |
| 1_1709 | Fieldwork_Jan2017 | 04/02/2017 | 22,55824 | 89,17171 | 36,576  | 4,214 |
| 1_1710 | Fieldwork_Jan2017 | 04/02/2017 | 22,55813 | 89,17155 | 42,672  | 3,511 |
| 1_1711 | Fieldwork_Jan2017 | 07/02/2017 | 22,62065 | 89,42347 | 36,576  | 6,93  |
| 1_1712 | Fieldwork_Jan2017 | 07/02/2017 | 22,61898 | 89,42655 | 27,432  | 2,489 |
| 1_1713 | Fieldwork_Jan2017 | 07/02/2017 | 22,61898 | 89,42655 | 33,528  | 2,414 |
| 1_1714 | Fieldwork_Jan2017 | 07/02/2017 | 22,61898 | 89,42655 | 45,72   | 3,596 |
| 1_1715 | Fieldwork_Jan2017 | 07/02/2017 | 22,62019 | 89,42468 | 21,336  | 8,085 |
| 1_1716 | Fieldwork_Jan2017 | 07/02/2017 | 22,62019 | 89,42468 | 30,48   | 7,763 |
| 1_1717 | Fieldwork_Jan2017 | 07/02/2017 | 22,62019 | 89,42468 | 42,672  | 5,991 |
| 1_1718 | Fieldwork_Jan2017 | 07/02/2017 | 22,61818 | 89,42756 | 19,812  | 4,138 |
| 1_1719 | Fieldwork_Jan2017 | 07/02/2017 | 22,61818 | 89,42756 | 27,432  | 2,243 |
| 1_1720 | Fieldwork_Jan2017 | 07/02/2017 | 22,61818 | 89,42756 | 38,1    | 2,478 |
| 1_1721 | Fieldwork_Jan2017 |            | 22,55799 | 89,16135 | 38,7096 | 2,64  |
| 1_1722 | Fieldwork_Jan2017 |            | 22,55071 | 89,15331 | 16,764  | 11,13 |
| 1_1723 | Fieldwork_Jan2017 |            | 22,52885 | 89,14762 | 5,4864  | 6,96  |

|        |                   |            |          |          |         |        |
|--------|-------------------|------------|----------|----------|---------|--------|
| 1_1724 | Fieldwork_Jan2017 |            | 22,53553 | 89,16007 | 7,0104  | 10,69  |
| 1_1725 | Fieldwork_Jan2017 |            | 22,5146  | 89,13296 | 35,9664 | 2,94   |
| 1_1726 | Fieldwork_May2016 | 19/05/2016 | 22,54297 | 89,16858 | 12,16   | 4,931  |
| 1_1727 | Fieldwork_May2016 | 19/05/2016 | 22,5393  | 89,16842 | 12,16   | 3,41   |
| 1_1728 | Fieldwork_May2016 | 19/05/2016 | 22,53989 | 89,16878 | 7,60    | 1,6    |
| 1_1729 | Fieldwork_May2016 | 20/05/2016 | 22,5334  | 89,17726 | 13,68   | 5,506  |
| 1_1730 | Fieldwork_May2016 | 20/05/2016 | 22,54007 | 89,1754  | 12,16   | 6,685  |
| 1_1731 | Fieldwork_May2016 | 20/05/2016 | 22,54347 | 89,17436 | 24,32   | 4,623  |
| 1_1732 | Fieldwork_May2016 | 20/05/2016 | 22,54583 | 89,17581 | 10,64   | 4,747  |
| 1_1733 | Fieldwork_May2016 | 20/05/2016 | 22,54624 | 89,17546 | 10,64   | 3,779  |
| 1_1734 | Fieldwork_May2016 | 20/05/2016 | 22,55152 | 89,16749 | 39,52   | 2,504  |
| 1_1735 | Fieldwork_May2016 | 20/05/2016 | 22,54909 | 89,1607  | 36,48   | 3,163  |
| 1_1736 | Fieldwork_May2016 | 20/05/2016 | 22,54911 | 89,16039 | 51,68   | 2,274  |
| 1_1737 | Fieldwork_May2016 | 20/05/2016 | 22,54794 | 89,1524  | 12,16   | 9,963  |
| 1_1738 | Fieldwork_May2016 | 20/05/2016 | 22,54574 | 89,152   | 19,76   | 4,995  |
| 1_1739 | Fieldwork_May2016 | 20/05/2016 | 22,53588 | 89,13321 | 12,16   | 3,457  |
| 1_1740 | Fieldwork_May2016 | 20/05/2016 | 22,53582 | 89,13377 | 16,72   | 3,93   |
| 1_1741 | Fieldwork_May2016 | 20/05/2016 | 22,53409 | 89,1329  | 16,72   | 1,142  |
| 1_1742 | Fieldwork_May2016 | 20/05/2016 | 22,5428  | 89,15217 | 13,68   | 0,772  |
| 1_1743 | Fieldwork_May2016 | 20/05/2016 | 22,54626 | 89,17337 | 10,64   | 1,618  |
| 1_1744 | Fieldwork_May2016 | 20/05/2016 | 22,54862 | 89,17947 | 13,68   | 3,905  |
| 1_1745 | Fieldwork_May2016 | 20/05/2016 | 22,49277 | 89,1594  | 42,56   | 3,082  |
| 1_1746 | Fieldwork_May2016 | 20/05/2016 | 22,50254 | 89,1591  | 33,44   | 4,921  |
| 1_1747 | Fieldwork_May2016 | 22/05/2016 | 22,5424  | 89,15344 | 12,16   | 2,197  |
| 1_1748 | Fieldwork_May2016 | 22/05/2016 | 22,54209 | 89,15329 | 12,16   | 2,105  |
| 1_1749 | Fieldwork_May2016 | 22/05/2016 | 22,54196 | 89,15224 | 13,68   | 0,6689 |
| 1_1750 | Fieldwork_May2016 | 22/05/2016 | 22,54158 | 89,15155 | 24,32   | 0,719  |
| 1_1751 | Fieldwork_May2016 | 22/05/2016 | 22,54149 | 89,15169 | 24,32   | 0,678  |
| 1_1752 | Fieldwork_May2016 | 22/05/2016 | 22,54112 | 89,15182 | 22,80   | 0,6798 |
| 1_1753 | Fieldwork_May2016 | 22/05/2016 | 22,54034 | 89,15103 | 13,68   | 0,947  |
| 1_1754 | Fieldwork_May2016 | 22/05/2016 | 22,54058 | 89,15059 | 12,16   | 0,903  |
| 1_1755 | Fieldwork_May2016 | 22/05/2016 | 22,5393  | 89,15007 | 15,20   | 3,176  |
| 1_1756 | Fieldwork_May2016 | 22/05/2016 | 22,53849 | 89,14613 | 24,32   | 1,44   |
| 1_1757 | Fieldwork_May2016 | 22/05/2016 | 22,53838 | 89,14545 | 13,68   | 1,949  |
| 1_1758 | Fieldwork_May2016 | 22/05/2016 | 22,53794 | 89,14405 | 21,28   | 2,192  |
| 1_1759 | Fieldwork_May2016 | 22/05/2016 | 22,53849 | 89,1448  | 25,84   | 1,265  |
| 1_1760 | Fieldwork_May2016 | 22/05/2016 | 22,53862 | 89,1436  | 24,32   | 2,477  |
| 1_1761 | Fieldwork_May2016 | 22/05/2016 | 22,53785 | 89,14351 | 12,16   | 2,301  |
| 1_1762 | Fieldwork_May2016 | 22/05/2016 | 22,53602 | 89,13903 | 24,32   | 2,092  |
| 1_1763 | Fieldwork_May2016 | 22/05/2016 | 22,53636 | 89,13888 | 16,72   | 0,904  |
| 1_1764 | Fieldwork_May2016 | 22/05/2016 | 22,51482 | 89,13759 | 13,68   | 4,567  |
| 1_1765 | Fieldwork_May2016 | 22/05/2016 | 22,5151  | 89,138   | 18,24   | 2,916  |
| 1_1766 | Fieldwork_May2016 | 22/05/2016 | 22,51545 | 89,13892 | 57,76   | 7,446  |
| 1_1767 | Fieldwork_May2016 | 22/05/2016 | 22,51584 | 89,13965 | 36,48   | 3,433  |
| 1_1768 | Fieldwork_May2016 | 22/05/2016 | 22,51842 | 89,15015 | 45,60   | 4,459  |
| 1_1769 | Fieldwork_May2016 | 22/05/2016 | 22,51764 | 89,15031 | 42,56   | 3,768  |
| 1_1770 | Fieldwork_May2016 | 22/05/2016 | 22,51733 | 89,1503  | 47,12   | 3,891  |

|        |                   |            |          |          |       |       |
|--------|-------------------|------------|----------|----------|-------|-------|
| 1_1771 | Fieldwork_May2016 | 22/05/2016 | 22,51814 | 89,15289 | 54,72 | 3,79  |
| 1_1772 | Fieldwork_May2016 | 23/05/2016 | 22,50292 | 89,15641 | 24,32 | 3,152 |
| 1_1773 | Fieldwork_May2016 | 23/05/2016 | 22,50396 | 89,15629 | 24,32 | 3,999 |
| 1_1774 | Fieldwork_May2016 | 23/05/2016 | 22,50403 | 89,15596 | 19,76 | 4,289 |
| 1_1775 | Fieldwork_May2016 | 23/05/2016 | 22,50455 | 89,15551 | 18,24 | 2,884 |
| 1_1776 | Fieldwork_May2016 | 23/05/2016 | 22,50401 | 89,15553 | 21,28 | 3,297 |
| 1_1777 | Fieldwork_May2016 | 23/05/2016 | 22,50581 | 89,15016 | 18,24 | 2,499 |
| 1_1778 | Fieldwork_May2016 | 23/05/2016 | 22,50565 | 89,14957 | 33,44 | 5,023 |
| 1_1779 | Fieldwork_May2016 | 23/05/2016 | 22,50619 | 89,14935 | 51,68 | 3,303 |
| 1_1780 | Fieldwork_May2016 | 23/05/2016 | 22,50589 | 89,14872 | 16,72 | 3,188 |
| 1_1781 | Fieldwork_May2016 | 23/05/2016 | 22,50618 | 89,14902 | 19,76 | 4,076 |
| 1_1782 | Fieldwork_May2016 | 23/05/2016 | 22,50611 | 89,14817 | 44,08 | 3,822 |
| 1_1783 | Fieldwork_May2016 | 23/05/2016 | 22,50644 | 89,14794 | 45,60 | 2,894 |
| 1_1784 | Fieldwork_May2016 | 23/05/2016 | 22,50664 | 89,14762 | 24,32 | 3,334 |
| 1_1785 | Fieldwork_May2016 | 23/05/2016 | 22,50951 | 89,17322 | 36,48 | 2,228 |
| 1_1786 | Fieldwork_May2016 | 23/05/2016 | 22,50959 | 89,17459 | 24,32 | 3,201 |
| 1_1787 | Fieldwork_May2016 | 23/05/2016 | 22,50889 | 89,17544 | 48,64 | 3,496 |
| 1_1788 | Fieldwork_May2016 | 23/05/2016 | 22,50896 | 89,17605 | 39,52 | 3,357 |
| 1_1789 | Fieldwork_May2016 | 24/05/2016 | 22,49929 | 89,17789 | 54,72 | 2,844 |
| 1_1790 | Fieldwork_May2016 | 24/05/2016 | 22,49906 | 89,17775 | 41,04 | 2,708 |
| 1_1791 | Fieldwork_May2016 | 24/05/2016 | 22,49851 | 89,17748 | 57,76 | 2,47  |
| 1_1792 | Fieldwork_May2016 | 24/05/2016 | 22,49854 | 89,17724 | 54,72 | 2,81  |
| 1_1793 | Fieldwork_May2016 | 24/05/2016 | 22,49907 | 89,17503 | 54,72 | 3,185 |
| 1_1794 | Fieldwork_May2016 | 24/05/2016 | 22,49923 | 89,17305 | 21,28 | 3,559 |
| 1_1795 | Fieldwork_May2016 | 24/05/2016 | 22,49889 | 89,17288 | 21,28 | 2,803 |
| 1_1796 | Fieldwork_May2016 | 24/05/2016 | 22,4994  | 89,17285 | 36,48 | 3,476 |
| 1_1797 | Fieldwork_May2016 | 24/05/2016 | 22,50024 | 89,17283 | 45,60 | 4,248 |
| 1_1798 | Fieldwork_May2016 | 24/05/2016 | 22,50013 | 89,17266 | 21,28 | 3,569 |
| 1_1799 | Fieldwork_May2016 | 24/05/2016 | 22,49686 | 89,17473 | 30,40 | 4,986 |
| 1_1800 | Fieldwork_May2016 | 29/05/2016 | 22,60059 | 89,52003 | 21,28 | 1,911 |
| 1_1801 | Fieldwork_May2016 | 29/05/2016 | 22,60089 | 89,52106 | 48,64 | 5,731 |
| 1_1802 | Fieldwork_May2016 | 29/05/2016 | 22,60096 | 89,52115 | 48,64 | 6,552 |
| 1_1803 | Fieldwork_May2016 | 29/05/2016 | 22,60249 | 89,52017 | 13,68 | 2,39  |
| 1_1804 | Fieldwork_May2016 | 29/05/2016 | 22,60352 | 89,52022 | 12,16 | 2,861 |
| 1_1805 | Fieldwork_May2016 | 29/05/2016 | 22,6041  | 89,52029 | 15,20 | 3,553 |
| 1_1806 | Fieldwork_May2016 | 29/05/2016 | 22,60424 | 89,51987 | 25,00 | 9,172 |
| 1_1807 | Fieldwork_May2016 | 30/05/2016 | 22,60597 | 89,52311 | 25,84 | 8,248 |
| 1_1808 | Fieldwork_May2016 | 30/05/2016 | 22,60633 | 89,52366 | 21,28 | 7,973 |
| 1_1809 | Fieldwork_May2016 | 30/05/2016 | 22,60633 | 89,52381 | 16,72 | 8,75  |
| 1_1810 | Fieldwork_May2016 | 30/05/2016 | 22,60632 | 89,52119 | 34,96 | 5,514 |
| 1_1811 | Fieldwork_May2016 | 30/05/2016 | 22,6058  | 89,52051 | 38,00 | 5,629 |
| 1_1812 | Fieldwork_May2016 | 30/05/2016 | 22,60609 | 89,51992 | 21,28 | 4,328 |
| 1_1813 | Fieldwork_May2016 | 30/05/2016 | 22,60655 | 89,52001 | 42,56 | 5,091 |
| 1_1814 | Fieldwork_May2016 | 30/05/2016 | 22,60713 | 89,51958 | 39,52 | 5,484 |
| 1_1815 | Fieldwork_May2016 | 30/05/2016 | 22,6064  | 89,51985 | 41,04 | 5,243 |
| 1_1816 | Fieldwork_May2016 | 30/05/2016 | 22,60766 | 89,5206  | 34,96 | 4,859 |
| 1_1817 | Fieldwork_May2016 | 30/05/2016 | 22,60773 | 89,52063 | 39,52 | 4,831 |

|        |                   |            |          |          |       |       |
|--------|-------------------|------------|----------|----------|-------|-------|
| 1_1818 | Fieldwork_May2016 | 30/05/2016 | 22,60809 | 89,52062 | 39,52 | 4,121 |
| 1_1819 | Fieldwork_May2016 | 30/05/2016 | 22,6085  | 89,52061 | 42,56 | 3,634 |
| 1_1820 | Fieldwork_May2016 | 30/05/2016 | 22,60885 | 89,52075 | 30,00 | 4,138 |
| 1_1821 | Fieldwork_May2016 | 30/05/2016 | 22,60472 | 89,51921 | 34,96 | 5,611 |
| 1_1822 | Fieldwork_May2016 | 30/05/2016 | 22,60474 | 89,51836 | 34,96 | 5,618 |
| 1_1823 | Fieldwork_May2016 | 30/05/2016 | 22,60464 | 89,51802 | 44,99 | 6,075 |
| 1_1824 | Fieldwork_May2016 | 30/05/2016 | 22,60432 | 89,51736 | 57,76 | 5,915 |
| 1_1825 | Fieldwork_May2016 | 30/05/2016 | 22,60432 | 89,51781 | 21,28 | 5,047 |
| 1_1826 | Fieldwork_May2016 | 30/05/2016 | 22,60421 | 89,51824 | 25,84 | 5,919 |
| 1_1827 | Fieldwork_May2016 | 30/05/2016 | 22,60264 | 89,51878 | 50,16 | 7,034 |
| 1_1828 | Fieldwork_May2016 | 30/05/2016 | 22,60255 | 89,5185  | 36,48 | 5,988 |
| 1_1829 | Fieldwork_May2016 | 30/05/2016 | 22,60268 | 89,51831 | 39,52 | 6,724 |
| 1_1830 | Fieldwork_May2016 | 30/05/2016 | 22,60233 | 89,51877 | 36,48 | 7,044 |
| 1_1831 | Fieldwork_May2016 | 30/05/2016 | 22,60214 | 89,51921 | 6,08  | 6,937 |
| 1_1832 | Fieldwork_May2016 | 30/05/2016 | 22,602   | 89,51916 | 30,40 | 6,97  |
| 1_1833 | Fieldwork_May2016 | 30/05/2016 | 22,60185 | 89,51915 | 30,40 | 6,777 |
| 1_1834 | Fieldwork_May2016 | 30/05/2016 | 22,60168 | 89,51907 | 19,76 | 5,908 |
| 1_1835 | Fieldwork_May2016 | 31/05/2016 | 22,60559 | 89,51955 | 34,96 | 5,056 |
| 1_1836 | Fieldwork_May2016 | 31/05/2016 | 22,60622 | 89,51932 | 38,00 | 4,606 |
| 1_1837 | Fieldwork_May2016 | 31/05/2016 | 22,60531 | 89,51879 | 41,04 | 5,15  |
| 1_1838 | Fieldwork_May2016 | 31/05/2016 | 22,60525 | 89,51863 | 48,64 | 4,956 |
| 1_1839 | Fieldwork_May2016 | 31/05/2016 | 22,6052  | 89,51777 | 41,04 | 5,079 |
| 1_1840 | Fieldwork_May2016 | 31/05/2016 | 22,60551 | 89,51789 | 36,48 | 4,447 |
| 1_1841 | Fieldwork_May2016 | 31/05/2016 | 22,60546 | 89,51759 | 42,56 | 5,111 |
| 1_1842 | Fieldwork_May2016 | 31/05/2016 | 22,60523 | 89,51599 | 39,52 | 5,249 |
| 1_1843 | Fieldwork_May2016 | 31/05/2016 | 22,60582 | 89,5149  | 42,56 | 5,03  |
| 1_1844 | Fieldwork_May2016 | 31/05/2016 | 22,60555 | 89,51484 | 41,04 | 5,071 |
| 1_1845 | Fieldwork_May2016 | 31/05/2016 | 22,60617 | 89,51479 | 39,52 | 4,386 |
| 1_1846 | Fieldwork_May2016 | 31/05/2016 | 22,60721 | 89,5149  | 45,60 | 4,661 |
| 1_1847 | Fieldwork_May2016 | 31/05/2016 | 22,60581 | 89,51404 | 36,48 | 4,923 |
| 1_1848 | Fieldwork_May2016 | 31/05/2016 | 22,60553 | 89,51373 | 42,56 | 4,955 |
| 1_1849 | Fieldwork_May2016 | 31/05/2016 | 22,6058  | 89,51315 | 36,48 | 4,77  |
| 1_1850 | Fieldwork_May2016 | 31/05/2016 | 22,60546 | 89,5131  | 45,60 | 4,791 |
| 1_1851 | Fieldwork_May2016 | 31/05/2016 | 22,60597 | 89,51076 | 22,80 | 3,721 |
| 1_1852 | Fieldwork_May2016 | 31/05/2016 | 22,60644 | 89,50965 | 39,52 | 3,519 |
| 1_1853 | Fieldwork_May2016 | 31/05/2016 | 22,60803 | 89,50896 | 54,72 | 3,76  |
| 1_1854 | Fieldwork_May2016 | 31/05/2016 | 22,60707 | 89,50825 | 16,72 | 3,023 |
| 1_1855 | Fieldwork_May2016 | 31/05/2016 | 22,60689 | 89,50806 | 19,76 | 3,812 |
| 1_1856 | Fieldwork_May2016 | 01/06/2016 | 22,58365 | 89,46897 | 36,48 | 4,378 |
| 1_1857 | Fieldwork_May2016 | 01/06/2016 | 22,58481 | 89,46903 | 45,60 | 5,022 |
| 1_1858 | Fieldwork_May2016 | 01/06/2016 | 22,58614 | 89,46816 | 38,61 | 4,259 |
| 1_1859 | Fieldwork_May2016 | 01/06/2016 | 22,58612 | 89,46803 | 41,65 | 4,911 |
| 1_1860 | Fieldwork_May2016 | 01/06/2016 | 22,58699 | 89,46805 | 36,48 | 3,677 |
| 1_1861 | Fieldwork_May2016 | 01/06/2016 | 22,58877 | 89,46689 | 31,92 | 5,667 |
| 1_1862 | Fieldwork_May2016 | 01/06/2016 | 22,58949 | 89,4659  | 42,56 | 4,691 |
| 1_1863 | Fieldwork_May2016 | 01/06/2016 | 22,58935 | 89,46563 | 36,48 | 4,853 |
| 1_1864 | Fieldwork_May2016 | 01/06/2016 | 22,59129 | 89,46659 | 24,32 | 4,643 |



|        |                   |            |          |          |        |       |
|--------|-------------------|------------|----------|----------|--------|-------|
| 1_1865 | Fieldwork_May2016 | 01/06/2016 | 22,59144 | 89,46915 | 19,76  | 4,571 |
| 1_1866 | Fieldwork_May2016 | 01/06/2016 | 22,59067 | 89,47105 | 22,80  | 4,496 |
| 1_1867 | MAR_sites         |            | 22,70015 | 89,86078 | 30,48  | 3,72  |
| 1_1868 | MAR_sites         |            | 22,72432 | 89,89086 | 22,86  | 0,9   |
| 1_1869 | MAR_sites         |            | 22,62168 | 89,83602 | 27,432 | 2,91  |
| 1_1870 | MAR_sites         |            | 22,57573 | 89,87375 | 21,336 | 3,52  |
| 1_1871 | MAR_sites         |            | 22,51669 | 89,72033 | 33,528 | 13,6  |
| 1_1872 | MAR_sites         |            | 22,54123 | 89,63853 | 27,432 | 6,85  |
| 1_1873 | MAR_sites         |            | 22,48711 | 89,64051 | 27,432 | 13,92 |
| 1_1874 | MAR_sites         |            | 22,447   | 89,708   | 27,432 | 21    |
| 1_1875 | MAR_sites         |            | 22,55606 | 89,65313 | 28,956 | 9,34  |
| 1_1876 | MAR_sites         |            | 22,54964 | 89,58803 | 36,576 | 9,4   |
| 1_1877 | MAR_sites         |            | 22,47287 | 89,69396 | 30,48  | 13,85 |
| 1_1878 | MAR_sites         |            | 22,46502 | 89,68173 | 24,384 | 7,82  |
| 1_1879 | MAR_sites         |            | 22,40724 | 89,68082 | 32,004 | 16,86 |
| 1_1880 | MAR_sites         |            | 22,29895 | 89,78232 | 19,812 | 15,03 |
| 1_1881 | MAR_sites         |            | 22,25596 | 89,83038 | 25,908 | 8,58  |
| 1_1882 | MAR_sites         |            | 22,21517 | 89,82979 | 41,148 | 9,46  |
| 1_1883 | MAR_sites         |            | 22,45786 | 89,83478 | 27,432 | 4,19  |
| 1_1884 | MAR_sites         |            | 22,48692 | 89,86239 | 22,86  | 3,71  |
| 1_1885 | MAR_sites         |            | 22,2928  | 89,78298 | 27,432 | 21,5  |
| 1_1886 | MAR_sites         |            | 22,33789 | 89,82123 | 21,336 | 6,72  |
| 1_1887 | MAR_sites         |            | 22,50271 | 89,86145 | 36,576 | 5,53  |
| 1_1888 | MAR_sites         |            | 22,50326 | 89,84449 | 21,336 | 3,82  |
| 1_1889 | MAR_sites         |            | 22,44167 | 89,80404 | 22,86  | 9,29  |
| 1_1890 | MAR_sites         |            | 22,64247 | 89,50693 | 32,004 | 7,88  |
| 1_1891 | MAR_sites         |            | 22,64622 | 89,44556 | 27,432 | 6,48  |
| 1_1892 | MAR_sites         |            | 22,59908 | 89,5175  | 47,244 | 8,55  |
| 1_1893 | MAR_sites         |            | 22,60174 | 89,5227  | 24,384 | 9,02  |
| 1_1894 | MAR_sites         |            | 22,60802 | 89,50882 | 22,86  | 4,1   |
| 1_1895 | MAR_sites         |            | 22,59776 | 89,4668  | 25,908 | 6,81  |
| 1_1896 | MAR_sites         |            | 22,52753 | 89,44522 | 19,812 | 13,2  |
| 1_1897 | MAR_sites         |            | 22,53388 | 89,49137 | 21,336 | 11,43 |
| 1_1898 | MAR_sites         |            | 22,50143 | 89,51763 | 30,48  | 9,23  |
| 1_1899 | MAR_sites         |            | 22,6476  | 89,42403 | 18,288 | 14,32 |
| 1_1900 | MAR_sites         |            | 22,66754 | 89,41473 | 24,384 | 5,27  |
| 1_1901 | MAR_sites         |            | 22,62899 | 89,52837 | 27,432 | 11,49 |
| 1_1902 | MAR_sites         |            | 22,6551  | 89,49141 | 32,004 | 5,59  |
| 1_1903 | MAR_sites         |            | 22,64109 | 89,47532 | 35,052 | 5,35  |
| 1_1904 | MAR_sites         |            | 22,60207 | 89,44875 | 24,384 | 9,94  |
| 1_1905 | MAR_sites         |            | 22,57838 | 89,47195 | 30,48  | 3,92  |
| 1_1906 | MAR_sites         |            | 22,66055 | 89,49564 | 27,432 | 6,93  |
| 1_1907 | MAR_sites         |            | 22,61697 | 89,27823 | 33,528 | 0,91  |
| 1_1908 | MAR_sites         |            | 22,64139 | 89,42094 | 18,288 | 5,8   |
| 1_1909 | MAR_sites         |            | 22,55174 | 89,30055 | 21,336 | 6,93  |
| 1_1910 | MAR_sites         |            | 22,5     | 89,25729 | 24,384 | 3,48  |
| 1_1911 | MAR_sites         |            | 22,49693 | 89,30923 | 30,48  | 6,65  |

|        |           |          |          |        |       |
|--------|-----------|----------|----------|--------|-------|
| 1_1912 | MAR_sites | 22,48683 | 89,3501  | 28,956 | 11,01 |
| 1_1913 | MAR_sites | 22,49615 | 89,31657 | 33,528 | 5,76  |
| 1_1914 | MAR_sites | 22,45661 | 89,29697 | 21,336 | 6,94  |
| 1_1915 | MAR_sites | 22,63334 | 89,44046 | 22,86  | 5,2   |
| 1_1916 | MAR_sites | 22,5439  | 89,17336 | 22,86  | 4,34  |
| 1_1917 | MAR_sites | 22,471   | 89,208   | 19,812 | 3,76  |
| 1_1918 | MAR_sites | 22,4765  | 89,1492  | 24,384 | 7,03  |
| 1_1919 | MAR_sites | 22,452   | 89,176   | 24,384 | 10,65 |
| 1_1920 | MAR_sites | 22,31387 | 89,05113 | 44,196 | 5,7   |
| 1_1921 | MAR_sites | 22,38776 | 89,06049 | 45,72  | 11    |
| 1_1922 | MAR_sites | 22,43916 | 89,05666 | 35,052 | 2,57  |
| 1_1923 | MAR_sites | 22,43722 | 89,04941 | 28,956 | 3,93  |
| 1_1924 | MAR_sites | 22,44333 | 89,05973 | 44,196 | 4,73  |
| 1_1925 | MAR_sites | 22,49751 | 89,07548 | 45,72  | 2,83  |
| 1_1926 | MAR_sites | 22,37567 | 89,06893 | 28,956 | 9,49  |
| 1_1927 | MAR_sites | 22,31526 | 89,11287 | 22,86  | 15,9  |
| 1_1928 | MAR_sites | 22,3117  | 89,13739 | 19,812 | 20,5  |
| 1_1929 | MAR_sites | 22,3864  | 89,0854  | 30,48  | 7,53  |
| 1_1930 | MAR_sites | 22,34008 | 89,10728 | 22,86  | 9,82  |
| 1_1931 | MAR_sites | 22,37315 | 89,08025 | 30,48  | 4,23  |
| 1_1932 | MAR_sites | 22,45217 | 89,15574 | 30,48  | 6,56  |
| 1_1933 | MAR_sites | 22,33421 | 89,04314 | 35,052 | 11,7  |
| 1_1934 | MAR_sites | 22,47077 | 89,21925 | 30,48  | 8,73  |
| 1_1935 | MAR_sites | 22,50709 | 89,19905 | 19,812 | 9,33  |
| 1_1936 | MAR_sites | 22,50924 | 89,19971 | 19,812 | 6,56  |
| 1_1937 | MAR_sites | 22,46066 | 89,21259 | 22,86  | 4,7   |
| 1_1938 | MAR_sites | 22,57718 | 89,12938 | 18,288 | 4,45  |
| 1_1939 | MAR_sites | 22,57386 | 89,13497 | 33,528 | 2,94  |
| 1_1940 | MAR_sites | 22,37602 | 89,05099 | 45,72  | 8,5   |
| 1_1941 | MAR_sites | 22,39121 | 89,0153  | 30,48  | 6,6   |
| 1_1942 | MAR_sites | 22,4709  | 89,1509  | 21,336 | 5,72  |
| 1_1943 | MAR_sites | 22,6338  | 89,5144  | 22,86  | 9,9   |
| 1_1944 | MAR_sites | 22,6719  | 89,439   | 24,384 | 3,02  |
| 1_1945 | MAR_sites | 22,5741  | 89,5004  | 21,336 | 11,28 |
| 1_1946 | MAR_sites | 22,5966  | 89,5146  | 39,624 | 4,08  |
| 1_1947 | MAR_sites | 22,5198  | 89,4916  | 22,86  | 10,4  |
| 1_1948 | MAR_sites | 22,3891  | 89,012   | 27,432 | 9,36  |
| 1_1949 | MAR_sites | 22,448   | 89,0389  | 30,48  | 6,03  |
| 1_1950 | MAR_sites | 22,5592  | 89,8599  | 27,432 | 7,04  |
| 1_1951 | MAR_sites | 22,5795  | 89,9198  | 27,432 | 7,06  |
| 1_1952 | MAR_sites | 22,41    | 89,6611  | 22,86  | 13,12 |
| 1_1953 | MAR_sites | 22,405   | 89,6435  | 21,336 | 15,85 |
| 1_1954 | MAR_sites | 22,5678  | 89,3298  | 21,336 | 6,01  |
| 1_1955 | MAR_sites | 22,3335  | 89,8093  | 32,004 | 12,01 |
| 1_1956 | MAR_sites | 22,3164  | 89,8444  | 21,336 | 11,85 |
| 1_1957 | MAR_sites | 22,3538  | 89,1053  | 30,48  | 11,38 |
| 1_1958 | MAR_sites | 22,3469  | 89,1019  | 24,384 | 11,42 |

|        |                 |         |         |         |        |
|--------|-----------------|---------|---------|---------|--------|
| 1_1959 | Vanderbilt_data | 22,4871 | 89,3487 | 24,384  | 6,345  |
| 1_1960 | Vanderbilt_data | 22,4786 | 89,3438 | 38,1    | 5,691  |
| 1_1961 | Vanderbilt_data | 22,4771 | 89,3425 | 39,624  | 5,478  |
| 1_1962 | Vanderbilt_data | 22,4825 | 89,3444 | 45,72   | 7,564  |
| 1_1963 | Vanderbilt_data | 22,486  | 89,35   | 54,864  | 7,692  |
| 1_1964 | Vanderbilt_data | 22,4859 | 89,352  | 54,864  | 7,222  |
| 1_1965 | Vanderbilt_data | 22,4857 | 89,3519 | 38,1    | 7,601  |
| 1_1966 | Vanderbilt_data | 22,4892 | 89,3542 | 50,292  | 7,779  |
| 1_1967 | Vanderbilt_data | 22,3954 | 89,8738 | 32,004  | 7,911  |
| 1_1968 | Vanderbilt_data | 22,3949 | 89,8728 | 19,812  | 6,201  |
| 1_1969 | Vanderbilt_data | 22,3926 | 89,8729 | 21,336  | 5,457  |
| 1_1970 | Vanderbilt_data | 22,3899 | 89,8742 | 27,432  | 8,369  |
| 1_1971 | Vanderbilt_data | 22,3866 | 89,8736 | 10,668  | 2,559  |
| 1_1972 | Vanderbilt_data | 22,3873 | 89,8716 | 10,668  | 6,607  |
| 1_1973 | Vanderbilt_data | 22,5506 | 89,5887 | 19,812  | 7,68   |
| 1_1974 | Vanderbilt_data | 22,55   | 89,5875 | 16,764  | 6,484  |
| 1_1975 | Vanderbilt_data | 22,5488 | 89,5841 | 10,668  | 15,138 |
| 1_1976 | Vanderbilt_data | 22,5459 | 89,5842 | 19,812  | 6,369  |
| 1_1977 | Vanderbilt_data | 22,5444 | 89,5821 | 16,764  | 8,311  |
| 1_1978 | Vanderbilt_data | 22,5431 | 89,5811 | 16,764  | 7,436  |
| 1_1979 | Vanderbilt_data | 22,5433 | 89,5779 | 21,336  | 4,158  |
| 1_1980 | Vanderbilt_data | 22,5463 | 89,5779 | 22,86   | 7,192  |
| 1_1981 | Vanderbilt_data | 22,5409 | 89,5796 | 19,812  | 8,787  |
| 1_1982 | Vanderbilt_data | 22,541  | 89,5799 | 13,716  | 7,489  |
| 1_1983 | Vanderbilt_data | 22,5424 | 89,5899 | 16,764  | 6,583  |
| 1_1984 | Vanderbilt_data | 22,5387 | 89,585  | 16,764  | 7,739  |
| 1_1985 | Vanderbilt_data | 22,5379 | 89,5829 | 18,288  | 5,438  |
| 1_1986 | Vanderbilt_data | 22,5372 | 89,5822 | 19,5072 | 6,28   |
| 1_1987 | Vanderbilt_data | 22,5304 | 89,5893 | 12,192  | 7,547  |
| 1_1988 | Vanderbilt_data | 22,462  | 89,2126 | 16,764  | 5,02   |
| 1_1989 | Vanderbilt_data | 22,4624 | 89,2127 | 10,668  | 7,076  |
| 1_1990 | Vanderbilt_data | 22,4614 | 89,2137 | 12,192  | 6,621  |
| 1_1991 | Vanderbilt_data | 22,4608 | 89,2133 | 21,336  | 8,401  |
| 1_1992 | Vanderbilt_data | 22,461  | 89,2158 | 10,668  | 10,566 |
| 1_1993 | Vanderbilt_data | 22,4597 | 89,2149 | 16,764  | 4,964  |
| 1_1994 | Vanderbilt_data | 22,4596 | 89,2143 | 10,668  | 4,227  |
| 1_1995 | Vanderbilt_data | 22,4575 | 89,2149 | 15,24   | 1,804  |
| 1_1996 | Vanderbilt_data | 22,4571 | 89,2145 | 13,716  | 2,618  |
| 1_1997 | Vanderbilt_data | 22,4584 | 89,2139 | 8,5344  | 1,457  |
| 1_1998 | Vanderbilt_data | 22,4589 | 89,2128 | 10,668  | 1,354  |
| 1_1999 | Vanderbilt_data | 22,4604 | 89,2127 | 15,24   | 6,891  |
| 1_2000 | Vanderbilt_data | 22,8693 | 89,31   | 51,816  | 2,42   |
| 1_2001 | Vanderbilt_data | 22,8672 | 89,3062 | 21,336  | 2,2    |
| 1_2002 | Vanderbilt_data | 22,8645 | 89,3058 | 48,768  | 0,9405 |
| 1_2003 | Vanderbilt_data | 22,8652 | 89,3086 | 34,1376 | 1,103  |
| 1_2004 | Vanderbilt_data | 22,8671 | 89,3102 | 56,388  | 1,333  |
| 1_2005 | Vanderbilt_data | 22,4861 | 89,6423 | 30,48   | 14,559 |

|        |                 |         |         |         |        |
|--------|-----------------|---------|---------|---------|--------|
| 1_2006 | Vanderbilt_data | 22,7186 | 89,8881 | 12,192  | 4,269  |
| 1_2007 | Vanderbilt_data | 22,7234 | 89,8905 | 21,336  | 1,237  |
| 1_2008 | Vanderbilt_data | 22,7248 | 89,8909 | 21,336  | 1,18   |
| 1_2009 | Vanderbilt_data | 22,7259 | 89,8915 | 10,0584 | 1,856  |
| 1_2010 | Vanderbilt_data | 22,7262 | 89,8913 | 21,336  | 0,8844 |
| 1_2011 | Vanderbilt_data | 22,7266 | 89,8921 | 13,716  | 0,995  |
| 1_2012 | Vanderbilt_data | 22,725  | 89,8916 | 18,288  | 1,066  |
| 1_2013 | Vanderbilt_data | 22,7237 | 89,892  | 16,764  | 0,8644 |
| 1_2014 | Vanderbilt_data | 22,7264 | 89,889  | 19,812  | 1,155  |
| 1_2015 | Vanderbilt_data | 22,7243 | 89,8895 | 12,192  | 1,119  |
| 1_2016 | Vanderbilt_data | 22,7251 | 89,8891 | 19,812  | 0,4295 |
| 1_2017 | Vanderbilt_data | 22,4619 | 89,9029 | 13,716  | 2,966  |
| 1_2018 | Vanderbilt_data | 22,4635 | 89,9019 | 13,716  | 5,768  |
| 1_2019 | Vanderbilt_data | 22,4644 | 89,9004 | 18,288  | 4,845  |
| 1_2020 | Vanderbilt_data | 22,4638 | 89,9001 | 13,716  | 3,386  |
| 1_2021 | Vanderbilt_data | 22,4667 | 89,8996 | 13,716  | 2,866  |
| 1_2022 | Vanderbilt_data | 22,4671 | 89,8992 | 13,716  | 3,101  |
| 1_2023 | Vanderbilt_data | 22,4671 | 89,8974 | 13,716  | 2,443  |
| 1_2024 | Vanderbilt_data | 22,4627 | 89,8935 | 18,288  | 3,419  |
| 1_2025 | Vanderbilt_data | 22,4594 | 89,8928 | 16,764  | 4,47   |
| 1_2026 | Vanderbilt_data | 22,5047 | 89,5217 | 18,288  | 9,662  |
| 1_2027 | Vanderbilt_data | 22,5047 | 89,5263 | 18,288  | 8,319  |
| 1_2028 | Vanderbilt_data | 22,5063 | 89,5301 | 18,288  | 7,39   |
| 1_2029 | Vanderbilt_data | 22,5136 | 89,5147 | 13,716  | 8,199  |
| 1_2030 | Vanderbilt_data | 22,4015 | 89,6568 | 13,716  | 9,236  |
| 1_2031 | Vanderbilt_data | 22,6392 | 89,4415 | 21,336  | 8,166  |
| 1_2032 | Vanderbilt_data | 22,6387 | 89,4426 | 38,1    | 5,574  |
| 1_2033 | Vanderbilt_data | 22,6389 | 89,4433 | 42,672  | 5,51   |
| 1_2034 | Vanderbilt_data | 22,632  | 89,4387 | 22,86   | 7,828  |
| 1_2035 | Vanderbilt_data | 22,6307 | 89,4415 | 15,24   | 6,956  |
| 1_2036 | Vanderbilt_data | 22,635  | 89,4354 | 28,956  | 6,031  |
| 1_2037 | Vanderbilt_data | 22,6345 | 89,435  | 28,956  | 5,966  |
| 1_2038 | Vanderbilt_data | 22,6346 | 89,4348 | 53,34   | 6,205  |
| 1_2039 | Vanderbilt_data | 22,5783 | 89,1284 | 27,432  | 3,405  |
| 1_2040 | Vanderbilt_data | 22,578  | 89,1283 | 25,908  | 4,203  |
| 1_2041 | Vanderbilt_data | 22,5771 | 89,1266 | 30,48   | 2,248  |
| 1_2042 | Vanderbilt_data | 22,5767 | 89,125  | 42,672  | 2,014  |
| 1_2043 | Vanderbilt_data | 22,5786 | 89,1254 | 38,1    | 3,568  |
| 1_2044 | Vanderbilt_data | 22,5795 | 89,127  | 50,292  | 3,179  |
| 1_2045 | Vanderbilt_data | 22,5794 | 89,1278 | 19,812  | 2,466  |
| 1_2046 | Vanderbilt_data | 22,5781 | 89,1279 | 25,908  | 3,342  |
| 1_2047 | Vanderbilt_data | 22,5777 | 89,1315 | 12,192  | 3,184  |
| 1_2048 | Vanderbilt_data | 22,5792 | 89,1332 | 33,528  | 3,396  |
| 1_2049 | Vanderbilt_data | 22,5805 | 89,1325 | 13,716  | 4,281  |
| 1_2050 | Vanderbilt_data | 22,6248 | 89,1343 | 28,956  | 0,8053 |
| 1_2051 | Vanderbilt_data | 22,6245 | 89,1317 | 16,764  | 0,9481 |
| 1_2052 | Vanderbilt_data | 22,6235 | 89,1316 | 18,288  | 1,477  |

|        |                 |         |         |        |        |
|--------|-----------------|---------|---------|--------|--------|
| 1_2053 | Vanderbilt_data | 22,621  | 89,1276 | 32,004 | 1,39   |
| 1_2054 | Vanderbilt_data | 22,6221 | 89,1285 | 27,432 | 1,516  |
| 1_2055 | Vanderbilt_data | 22,6223 | 89,1295 | 32,004 | 1,319  |
| 1_2056 | Vanderbilt_data | 22,6232 | 89,1306 | 18,288 | 1,127  |
| 1_2057 | Vanderbilt_data | 22,6231 | 89,1292 | 19,812 | 1,075  |
| 1_2058 | Vanderbilt_data | 22,6238 | 89,1302 | 19,812 | 0,9389 |
| 1_2059 | Vanderbilt_data | 22,6278 | 89,13   | 42,672 | 0,8618 |
| 1_2060 | Vanderbilt_data | 22,6278 | 89,1316 | 24,384 | 0,8925 |
| 1_2061 | Vanderbilt_data | 22,6249 | 89,1302 | 16,764 | 0,8974 |
| 1_2062 | Vanderbilt_data | 22,716  | 89,1864 | 19,812 | 1,557  |
| 1_2063 | Vanderbilt_data | 22,7145 | 89,1826 | 57,912 | 1,69   |
| 1_2064 | Vanderbilt_data | 22,7194 | 89,188  | 36,576 | 1,579  |
| 1_2065 | Vanderbilt_data | 22,7152 | 89,2015 | 51,816 | 2,06   |
| 1_2066 | Vanderbilt_data | 22,7122 | 89,1897 | 35,052 | 1,698  |
| 1_2067 | Vanderbilt_data | 22,7266 | 89,1912 | 51,816 | 0,7037 |
| 1_2068 | Vanderbilt_data | 22,7337 | 89,1767 | 38,1   | 1,428  |
| 1_2069 | Vanderbilt_data | 22,7375 | 89,1891 | 56,388 | 1,213  |
| 1_2070 | Vanderbilt_data | 22,4513 | 89,1572 | 44,196 | 6,687  |
| 1_2071 | Vanderbilt_data | 22,4503 | 89,157  | 18,288 | 6,58   |
| 1_2072 | Vanderbilt_data | 22,453  | 89,1557 | 51,816 | 10,706 |
| 1_2073 | Vanderbilt_data | 22,4571 | 89,1556 | 38,1   | 5,594  |
| 1_2074 | Vanderbilt_data | 22,4566 | 89,2974 | 16,764 | 6,042  |
| 1_2075 | Vanderbilt_data | 22,4564 | 89,2972 | 13,716 | 5,81   |
| 1_2076 | Vanderbilt_data | 22,4563 | 89,2975 | 54,864 | 6,957  |
| 1_2077 | Vanderbilt_data | 22,4564 | 89,2985 | 18,288 | 5,547  |
| 1_2078 | Vanderbilt_data | 22,4572 | 89,2985 | 19,812 | 6,366  |
| 1_2079 | Vanderbilt_data | 22,4576 | 89,2996 | 19,812 | 10,156 |
| 1_2080 | Vanderbilt_data | 22,4576 | 89,3003 | 9,144  | 5,122  |
| 1_2081 | Vanderbilt_data | 22,4561 | 89,2971 | 16,764 | 6,771  |
| 1_2082 | Vanderbilt_data | 22,5053 | 89,8501 | 13,716 | 3,324  |
| 1_2083 | Vanderbilt_data | 22,5052 | 89,8495 | 21,336 | 3,266  |
| 1_2084 | Vanderbilt_data | 22,5048 | 89,851  | 21,336 | 3,584  |
| 1_2085 | Vanderbilt_data | 22,5074 | 89,8617 | 35,052 | 5,71   |
| 1_2086 | Vanderbilt_data | 22,9987 | 89,5673 | 54,864 | 2,46   |
| 1_2087 | Vanderbilt_data | 22,5242 | 89,6554 | 13,716 | 6,42   |
| 1_2088 | Vanderbilt_data | 22,5244 | 89,6549 | 13,716 | 6,783  |
| 1_2089 | Vanderbilt_data | 22,617  | 89,2782 | 30,48  | 0,8036 |
| 1_2090 | Vanderbilt_data | 22,6171 | 89,2794 | 30,48  | 0,8227 |
| 1_2091 | Vanderbilt_data | 22,6173 | 89,2798 | 30,48  | 1,102  |
| 1_2092 | Vanderbilt_data | 22,6167 | 89,2796 | 38,1   | 0,9298 |
| 1_2093 | Vanderbilt_data | 22,6165 | 89,2808 | 28,956 | 1,028  |
| 1_2094 | Vanderbilt_data | 22,617  | 89,2817 | 21,336 | 1,066  |
| 1_2095 | Vanderbilt_data | 22,6163 | 89,2804 | 38,1   | 0,8761 |
| 1_2096 | Vanderbilt_data | 22,6164 | 89,2793 | 47,244 | 0,9831 |
| 1_2097 | Vanderbilt_data | 22,6154 | 89,2787 | 28,956 | 1,31   |
| 1_2098 | Vanderbilt_data | 22,6162 | 89,2783 | 24,384 | 0,8533 |
| 1_2099 | Vanderbilt_data | 22,6153 | 89,2775 | 45,72  | 1,061  |

|        |                 |         |         |         |        |
|--------|-----------------|---------|---------|---------|--------|
| 1_2100 | Vanderbilt_data | 22,6167 | 89,2769 | 36,576  | 1,079  |
| 1_2101 | Vanderbilt_data | 22,6174 | 89,2771 | 28,956  | 0,9269 |
| 1_2102 | Vanderbilt_data | 22,6177 | 89,2771 | 33,528  | 0,7311 |
| 1_2103 | Vanderbilt_data | 22,542  | 89,6389 | 24,384  | 3,67   |
| 1_2104 | Vanderbilt_data | 22,5412 | 89,643  | 24,384  | 4,54   |
| 1_2105 | Vanderbilt_data | 22,5415 | 89,6431 | 18,288  | 4,975  |
| 1_2106 | Vanderbilt_data | 22,5407 | 89,6451 | 27,432  | 4,891  |
| 1_2107 | Vanderbilt_data | 22,5402 | 89,6446 | 13,716  | 3,905  |
| 1_2108 | Vanderbilt_data | 22,5409 | 89,646  | 13,716  | 4,906  |
| 1_2109 | Vanderbilt_data | 22,6249 | 89,8332 | 19,812  | 2,725  |
| 1_2110 | Vanderbilt_data | 22,6261 | 89,8316 | 16,764  | 3,238  |
| 1_2111 | Vanderbilt_data | 22,6346 | 89,8365 | 13,716  | 5,967  |
| 1_2112 | Vanderbilt_data | 22,6343 | 89,8364 | 15,24   | 3,45   |
| 1_2113 | Vanderbilt_data | 22,6343 | 89,8374 | 12,192  | 3,366  |
| 1_2114 | Vanderbilt_data | 22,5075 | 89,1991 | 48,768  | 4,886  |
| 1_2115 | Vanderbilt_data | 22,5074 | 89,1997 | 48,768  | 4,923  |
| 1_2116 | Vanderbilt_data | 22,5074 | 89,2012 | 33,528  | 5,037  |
| 1_2117 | Vanderbilt_data | 22,5066 | 89,2051 | 56,388  | 5,42   |
| 1_2118 | Vanderbilt_data | 22,5068 | 89,1992 | 50,292  | 4,877  |
| 1_2119 | Vanderbilt_data | 22,5068 | 89,1988 | 59,436  | 6,034  |
| 1_2120 | Vanderbilt_data | 22,5061 | 89,198  | 49,6824 | 4,823  |
| 1_2121 | Vanderbilt_data | 22,5082 | 89,1986 | 16,764  | 11,345 |
| 1_2122 | Vanderbilt_data | 22,5085 | 89,2009 | 50,292  | 4,969  |
| 1_2123 | Vanderbilt_data | 22,509  | 89,2006 | 56,388  | 5,05   |
| 1_2124 | Vanderbilt_data | 22,4396 | 89,0563 | 42,672  | 2,722  |
| 1_2125 | Vanderbilt_data | 22,4377 | 89,0567 | 35,052  | 2,5    |
| 1_2126 | Vanderbilt_data | 22,4376 | 89,0579 | 38,1    | 2,126  |
| 1_2127 | Vanderbilt_data | 22,4383 | 89,0576 | 39,624  | 2,452  |
| 1_2128 | Vanderbilt_data | 22,4387 | 89,0582 | 36,576  | 2,291  |
| 1_2129 | Vanderbilt_data | 22,4405 | 89,0586 | 21,336  | 2,627  |
| 1_2130 | Vanderbilt_data | 22,4416 | 89,0571 | 36,576  | 4,914  |
| 1_2131 | Vanderbilt_data | 22,4411 | 89,0566 | 54,864  | 3,551  |
| 1_2132 | Vanderbilt_data | 22,4415 | 89,0554 | 16,764  | 5,01   |
| 1_2133 | Vanderbilt_data | 22,4406 | 89,0556 | 21,9456 | 3,128  |
| 1_2134 | Vanderbilt_data | 22,4401 | 89,0551 | 27,432  | 2,925  |
| 1_2135 | Vanderbilt_data | 22,4387 | 89,0556 | 36,576  | 2,842  |
| 1_2136 | Vanderbilt_data | 22,4366 | 89,0567 | 36,576  | 2,357  |
| 1_2137 | Vanderbilt_data | 22,9818 | 89,4686 | 21,336  | 0,8852 |
| 1_2138 | Vanderbilt_data | 22,9688 | 89,4787 | 51,816  | 0,7104 |
| 1_2139 | Vanderbilt_data | 22,9721 | 89,4705 | 53,34   | 1,071  |
| 1_2140 | Vanderbilt_data | 22,9742 | 89,4735 | 48,768  | 0,9201 |
| 1_2141 | Vanderbilt_data | 22,5784 | 89,4718 | 36,576  | 6,616  |
| 1_2142 | Vanderbilt_data | 22,5788 | 89,472  | 36,576  | 3,043  |
| 1_2143 | Vanderbilt_data | 22,5837 | 89,469  | 39,624  | 5,823  |
| 1_2144 | Vanderbilt_data | 22,5871 | 89,4681 | 34,7472 | 4,802  |
| 1_2145 | Vanderbilt_data | 22,5862 | 89,4682 | 38,7096 | 5,755  |
| 1_2146 | Vanderbilt_data | 22,5688 | 89,456  | 25,908  | 3,652  |

|        |                                |          |          |         |        |
|--------|--------------------------------|----------|----------|---------|--------|
| 1_2147 | Vanderbilt_data                | 22,5698  | 89,4599  | 34,4424 | 9,075  |
| 1_2148 | Vanderbilt_data                | 22,597   | 89,456   | 12,192  | 6,143  |
| 1_2149 | Vanderbilt_data                | 22,5966  | 89,4674  | 19,812  | 9,763  |
| 1_2150 | Vanderbilt_data                | 22,5956  | 89,4665  | 19,812  | 6,368  |
| 1_2151 | Vanderbilt_data                | 22,5921  | 89,4703  | 16,764  | 7,549  |
| 1_2152 | Vanderbilt_data                | 22,5924  | 89,4708  | 15,24   | 8,37   |
| 1_2153 | Vanderbilt_data                | 22,5991  | 89,4459  | 30,48   | 2,72   |
| 1_2154 | Vanderbilt_data                | 22,6004  | 89,4484  | 16,764  | 6,449  |
| 1_2155 | Vanderbilt_data                | 22,4574  | 89,8357  | 18,288  | 3,477  |
| 1_2156 | Vanderbilt_data                | 22,4568  | 89,8352  | 13,716  | 3,247  |
| 1_2157 | Vanderbilt_data                | 22,4558  | 89,8359  | 24,384  | 3,994  |
| 1_2158 | Vanderbilt_data                | 22,4545  | 89,835   | 36,576  | 4,453  |
| 1_2159 | Vanderbilt_data                | 22,4537  | 89,8317  | 27,432  | 4,131  |
| 1_2160 | Vanderbilt_data                | 22,4595  | 89,8371  | 27,432  | 6,298  |
| 1_2161 | Vanderbilt_data                | 22,6464  | 89,4455  | 30,48   | 8,156  |
| 1_2162 | Vanderbilt_data                | 22,6454  | 89,4455  | 21,336  | 6,402  |
| 1_2163 | Vanderbilt_data                | 22,6496  | 89,4422  | 44,196  | 6,608  |
| 1_2164 | Vanderbilt_data                | 22,6558  | 89,4437  | 48,768  | 3,446  |
| 1_2165 | Vanderbilt_data                | 22,6564  | 89,4432  | 36,576  | 3,691  |
| 1_2166 | Vanderbilt_data                | 22,6572  | 89,4429  | 42,672  | 3,961  |
| 1_2167 | Vanderbilt_data                | 22,658   | 89,4552  | 42,672  | 2,457  |
| 1_2168 | Vanderbilt_data                | 22,6493  | 89,4546  | 50,292  | 9,198  |
| 1_2169 | Vanderbilt_data                | 22,6483  | 89,4537  | 48,768  | 5,09   |
| 1_2170 | JD_fieldwork_jan201 2018-01-15 | 22,52408 | 89,13009 | 54,864  | 0,482  |
| 1_2171 | JD_fieldwork_jan201 2018-01-15 | 22,5309  | 89,13391 | 9,144   | 0,602  |
| 1_2172 | JD_fieldwork_jan201 2018-01-15 | 22,52349 | 89,12949 | 18,288  | 0,625  |
| 1_2173 | JD_fieldwork_jan201 2018-01-28 | 22,53976 | 89,13241 | 19,812  | 0,6667 |
| 1_2174 | JD_fieldwork_jan201 2018-01-15 | 22,52744 | 89,13186 | 16,764  | 0,737  |
| 1_2175 | JD_fieldwork_jan201 2018-01-28 | 22,54144 | 89,13036 | 15,24   | 0,7635 |
| 1_2176 | JD_fieldwork_jan201 2018-01-28 | 22,54221 | 89,12771 | 18,288  | 0,7809 |
| 1_2177 | JD_fieldwork_jan201 2018-01-15 | 22,53213 | 89,13322 | 10,668  | 0,946  |
| 1_2178 | JD_fieldwork_jan201 2018-01-26 | 22,52665 | 89,15778 | 25,908  | 1,002  |
| 1_2179 | JD_fieldwork_jan201 2018-01-15 | 22,52018 | 89,12881 | 13,716  | 1,032  |
| 1_2180 | JD_fieldwork_jan201 2018-01-28 | 22,54025 | 89,13189 | 18,288  | 1,032  |
| 1_2181 | JD_fieldwork_jan201 2018-01-15 | 22,52266 | 89,12971 | 18,288  | 1,054  |
| 1_2182 | JD_fieldwork_jan201 2018-01-28 | 22,5435  | 89,12515 | 19,812  | 1,114  |
| 1_2183 | JD_fieldwork_jan201 2018-01-26 | 22,54583 | 89,17555 | 13,716  | 1,129  |
| 1_2184 | JD_fieldwork_jan201 2018-01-28 | 22,54499 | 89,1263  | 18,288  | 1,19   |
| 1_2185 | JD_fieldwork_jan201 2018-01-15 | 22,54326 | 89,13335 | 7,62    | 1,207  |
| 1_2186 | JD_fieldwork_jan201 2018-01-28 | 22,54627 | 89,12656 | 18,288  | 1,25   |
| 1_2187 | JD_fieldwork_jan201 2018-01-15 | 22,5378  | 89,13276 | 19,812  | 1,254  |
| 1_2188 | JD_fieldwork_jan201 2018-01-15 | 22,53888 | 89,13279 | 22,86   | 1,274  |
| 1_2189 | JD_fieldwork_jan201 2018-01-15 | 22,5378  | 89,13276 | 19,812  | 1,344  |
| 1_2190 | JD_fieldwork_jan201 2018-01-26 | 22,52645 | 89,1572  | 28,956  | 1,346  |
| 1_2191 | JD_fieldwork_jan201 2018-01-15 | 22,519   | 89,12817 | 18,288  | 1,369  |
| 1_2192 | JD_fieldwork_jan201 2018-01-26 | 22,52965 | 89,15823 | 13,716  | 1,437  |
| 1_2193 | JD_fieldwork_jan201 2018-01-15 | 22,53516 | 89,13373 | 19,812  | 1,439  |

|        |                     |            |          |          |        |       |
|--------|---------------------|------------|----------|----------|--------|-------|
| 1_2194 | JD_fieldwork_jan201 | 2018-01-26 | 22,52597 | 89,15662 | 18,288 | 1,561 |
| 1_2195 | JD_fieldwork_jan201 | 2018-01-15 | 22,51842 | 89,12773 | 22,86  | 1,578 |
| 1_2196 | JD_fieldwork_jan201 | 2018-01-26 | 22,52558 | 89,15629 | 21,336 | 1,622 |
| 1_2197 | JD_fieldwork_jan201 | 2018-01-28 | 22,54712 | 89,12875 | 13,716 | 1,68  |
| 1_2198 | JD_fieldwork_jan201 | 2018-01-15 | 22,54327 | 89,13334 | 9,144  | 1,747 |
| 1_2199 | JD_fieldwork_jan201 | 2018-01-26 | 22,53182 | 89,16256 | 48,768 | 1,789 |
| 1_2200 | JD_fieldwork_jan201 | 2018-01-15 | 22,51719 | 89,12774 | 36,576 | 1,82  |
| 1_2201 | JD_fieldwork_jan201 | 2018-01-15 | 22,51616 | 89,12783 | 42,672 | 2,118 |
| 1_2202 | JD_fieldwork_jan201 | 2018-01-26 | 22,55197 | 89,1861  | 51,816 | 2,128 |
| 1_2203 | JD_fieldwork_jan201 | 2018-01-28 | 22,53546 | 89,13757 | 48,768 | 2,159 |
| 1_2204 | JD_fieldwork_jan201 | 2018-01-23 | 22,5445  | 89,18167 | 25,908 | 2,227 |
| 1_2205 | JD_fieldwork_jan201 | 2018-01-15 | 22,54317 | 89,13342 | 7,62   | 2,276 |
| 1_2206 | JD_fieldwork_jan201 | 2018-01-26 | 22,5519  | 89,18323 | 18,288 | 2,287 |
| 1_2207 | JD_fieldwork_jan201 | 2018-01-26 | 22,53702 | 89,1746  | 13,716 | 2,306 |
| 1_2208 | JD_fieldwork_jan201 | 2018-01-26 | 22,53361 | 89,16338 | 39,624 | 2,314 |
| 1_2209 | JD_fieldwork_jan201 | 2018-01-26 | 22,54587 | 89,17574 | 9,144  | 2,479 |
| 1_2210 | JD_fieldwork_jan201 | 2018-01-26 | 22,54169 | 89,17339 | 12,192 | 2,5   |
| 1_2211 | JD_fieldwork_jan201 | 2018-01-26 | 22,53772 | 89,17475 | 8,2296 | 2,527 |
| 1_2212 | JD_fieldwork_jan201 | 2018-01-26 | 22,53454 | 89,17572 | 18,288 | 2,552 |
| 1_2213 | JD_fieldwork_jan201 | 2018-01-26 | 22,54333 | 89,17436 | 13,716 | 2,554 |
| 1_2214 | JD_fieldwork_jan201 | 2018-01-15 | 22,54691 | 89,1341  | 33,528 | 2,556 |
| 1_2215 | JD_fieldwork_jan201 | 2018-01-15 | 22,54793 | 89,1341  | 33,528 | 2,566 |
| 1_2216 | JD_fieldwork_jan201 | 2018-01-26 | 22,52933 | 89,1586  | 54,864 | 2,603 |
| 1_2217 | JD_fieldwork_jan201 | 2018-01-26 | 22,54168 | 89,17354 | 13,716 | 2,648 |
| 1_2218 | JD_fieldwork_jan201 | 2018-01-26 | 22,54636 | 89,17531 | 16,764 | 2,705 |
| 1_2219 | JD_fieldwork_jan201 | 2018-01-26 | 22,538   | 89,17506 | 9,144  | 2,706 |
| 1_2220 | JD_fieldwork_jan201 | 2018-01-26 | 22,52936 | 89,1587  | 59,436 | 2,763 |
| 1_2221 | JD_fieldwork_jan201 | 2018-01-15 | 22,54366 | 89,13337 | 12,192 | 2,767 |
| 1_2222 | JD_fieldwork_jan201 | 2018-01-15 | 22,51278 | 89,12748 | 45,72  | 2,77  |
| 1_2223 | JD_fieldwork_jan201 | 2018-01-28 | 22,54512 | 89,15346 | 32,004 | 2,921 |
| 1_2224 | JD_fieldwork_jan201 | 2018-01-15 | 22,54793 | 89,1341  | 30,48  | 2,931 |
| 1_2225 | JD_fieldwork_jan201 | 2018-01-26 | 22,54737 | 89,17466 | 22,86  | 3,113 |
| 1_2226 | JD_fieldwork_jan201 | 2018-01-26 | 22,54761 | 89,17541 | 27,432 | 3,168 |
| 1_2227 | JD_fieldwork_jan201 | 2018-01-15 | 22,5467  | 89,13376 | 30,48  | 3,293 |
| 1_2228 | JD_fieldwork_jan201 | 2018-01-26 | 22,54576 | 89,17576 | 7,62   | 3,307 |
| 1_2229 | JD_fieldwork_jan201 | 2018-01-15 | 22,54109 | 89,13298 | 18,288 | 3,67  |
| 1_2230 | JD_fieldwork_jan201 | 2018-01-26 | 22,53288 | 89,1629  | 39,624 | 3,701 |
| 1_2231 | JD_fieldwork_jan201 | 2018-01-23 | 22,5303  | 89,17866 | 13,716 | 3,829 |
| 1_2232 | JD_fieldwork_jan201 | 2018-01-26 | 22,53436 | 89,17717 | 9,144  | 3,96  |
| 1_2233 | JD_fieldwork_jan201 | 2018-01-26 | 22,54162 | 89,17378 | 12,192 | 3,999 |
| 1_2234 | JD_fieldwork_jan201 | 2018-01-28 | 22,54481 | 89,15319 | 54,864 | 4,063 |
| 1_2235 | JD_fieldwork_jan201 | 2018-01-26 | 22,54806 | 89,17423 | 27,432 | 4,088 |
| 1_2236 | JD_fieldwork_jan201 | 2018-01-26 | 22,55205 | 89,18104 | 42,672 | 4,112 |
| 1_2237 | JD_fieldwork_jan201 | 2018-01-26 | 22,53817 | 89,17477 | 7,3152 | 4,123 |
| 1_2238 | JD_fieldwork_jan201 | 2018-01-26 | 22,54815 | 89,17622 | 21,336 | 4,566 |
| 1_2239 | JD_fieldwork_jan201 | 2018-01-26 | 22,54817 | 89,17651 | 15,24  | 4,648 |
| 1_2240 | JD_fieldwork_jan201 | 2018-01-26 | 22,54939 | 89,17842 | 27,432 | 5,371 |



|        |                     |            |          |          |         |       |
|--------|---------------------|------------|----------|----------|---------|-------|
| 1_2241 | JD_fieldwork_jan201 | 2018-01-15 | 22,55095 | 89,13448 | 10,668  | 11,62 |
| 1_2242 | Abir_12_03_2013     | 12.03.18   | 22,55162 | 89,16024 | 44,196  | 2,14  |
| 1_2243 | Abir_12_03_2013     | 12.03.18   | 22,55173 | 89,16035 | 47,244  | 2,25  |
| 1_2244 | Abir_12_03_2013     | 12.03.18   | 22,55245 | 89,16196 | 24,384  | 1,94  |
| 1_2245 | Abir_12_03_2013     | 12.03.18   | 22,55938 | 89,16213 | 39,624  | 1,98  |
| 1_2246 | Abir_12_03_2013     | 12.03.18   | 22,55277 | 89,15848 | 51,816  | 2,07  |
| 1_2247 | Abir_12_03_2013     | 12.03.18   | 22,5521  | 89,15857 | 48,768  | 2,05  |
| 1_2248 | Abir_12_03_2013     | 12.03.18   | 22,5517  | 89,1583  | 48,768  | 2,12  |
| 1_2249 | Abir_12_03_2013     | 12.03.18   | 22,55187 | 89,15816 | 47,244  | 2,16  |
| 1_2250 | Abir_12_03_2013     | 12.03.18   | 22,55274 | 89,15742 | 41,148  | 1,98  |
| 1_2251 | Abir_12_03_2013     | 12.03.18   | 22,55292 | 89,15694 | 47,244  | 2,46  |
| 1_2252 | Abir_12_03_2013     | 12.03.18   | 22,55327 | 89,1567  | 42,672  | 1,96  |
| 1_2253 | Abir_12_03_2013     | 12.03.18   | 22,55344 | 89,15695 | 48,768  | 2,31  |
| 1_2254 | Abir_12_03_2013     | 12.03.18   | 22,5533  | 89,15699 | 47,244  | 2,11  |
| 1_2255 | Abir_12_03_2013     | 12.03.18   | 22,55329 | 89,15723 | 22,86   | 3,43  |
| 1_2256 | Abir_12_03_2013     | 12.03.18   | 22,5532  | 89,15742 | 44,196  | 2,12  |
| 1_2257 | Abir_12_03_2013     | 12.03.18   | 22,55311 | 89,15765 | 48,768  | 2,48  |
| 1_2258 | Abir_12_03_2013     | 12.03.18   | 22,55327 | 89,15758 | 45,72   | 1,97  |
| 1_2259 | Abir_12_03_2013     | 12.03.18   | 22,55329 | 89,15601 | 21,9456 | 2,94  |
| 1_2260 | Abir_12_03_2013     | 12.03.18   | 22,55419 | 89,15632 | 50,292  | 2,07  |
| 1_2261 | Abir_12_03_2013     | 12.03.18   | 22,55435 | 89,15619 | 16,764  | 4,09  |
| 1_2262 | Abir_12_03_2013     | 12.03.18   | 22,55448 | 89,1562  | 48,768  | 1,89  |
| 1_2263 | Abir_12_03_2013     | 12.03.18   | 22,55546 | 89,15609 | 45,72   | 1,88  |
| 1_2264 | Abir_12_03_2013     | 12.03.18   | 22,55366 | 89,16501 | 50,292  | 1,98  |
| 1_2265 | Abir_12_03_2013     | 12.03.18   | 22,55393 | 89,16817 | 45,72   | 2,08  |
| 1_2266 | Abir_12_03_2013     | 12.03.18   | 22,55266 | 89,17082 | 54,864  | 2,21  |
| 1_2267 | September_2018      | 11.09.2018 | 22,55369 | 89,16882 | 51,816  | 2,71  |
| 1_2268 | September_2018      | 11.09.2018 | 22,5536  | 89,16906 | 45,72   | 2,65  |
| 1_2269 | September_2018      | 11.09.2018 | 22,55424 | 89,17012 | 48,768  | 2,78  |
| 1_2270 | September_2018      | 11.09.2018 | 22,55772 | 89,15498 | 48,768  | 2,2   |
| 1_2271 | September_2018      | 12.09.2018 | 22,56128 | 89,15533 | 56,388  | 1,89  |
| 1_2272 | September_2018      | 12.09.2018 | 22,55998 | 89,15527 | 54,864  | 1,88  |
| 1_2273 | September_2018      | 12.09.2018 | 22,5601  | 89,15628 | 54,864  | 1,87  |
| 1_2274 | September_2018      | 12.09.2018 | 22,56132 | 89,15605 | 51,816  | 1,81  |
| 1_2275 | September_2018      | 12.09.2018 | 22,56105 | 89,15486 | 48,768  | 2     |
| 1_2276 | September_2018      | 12.09.2018 | 22,56085 | 89,155   | 48,768  | 1,87  |
| 1_2277 | September_2018      | 12.09.2018 | 22,5608  | 89,15465 | 54,864  | 2,25  |
| 1_2278 | September_2018      | 12.09.2018 | 22,56144 | 89,15502 | 54,864  | 2,37  |
| 1_2279 | September_2018      | 12.09.2018 | 22,56895 | 89,13379 | 42,672  | 4,45  |
| 1_2280 | September_2018      | 12.09.2018 | 22,60953 | 89,14785 | 42,672  | 0,81  |
| 1_2281 | September_2018      | 13.09.2018 | 22,60945 | 89,14776 | 41,148  | 0,76  |
| 1_2282 | September_2018      | 13.09.2018 | 22,60533 | 89,14646 | 39,624  | 0,73  |
| 1_2283 | September_2018      | 13.09.2018 | 22,60261 | 89,14517 | 24,384  | 0,64  |

|        |                |            |          |          |        |      |
|--------|----------------|------------|----------|----------|--------|------|
| 1_2284 | September_2018 | 13.09.2018 | 22,59911 | 89,14723 | 21,336 | 0,79 |
| 1_2285 | September_2018 | 13.09.2018 | 22,59892 | 89,14708 | 19,812 | 0,82 |
| 1_2286 | September_2018 | 13.09.2018 | 22,59508 | 89,15077 | 22,86  | 1,22 |
| 1_2287 | September_2018 | 13.09.2018 | 22,59543 | 89,15042 | 22,86  | 1,3  |
| 1_2288 | September_2018 | 13.09.2018 | 22,58982 | 89,15777 | 21,336 | 1,75 |
| 1_2289 | September_2018 | 13.09.2018 | 22,59157 | 89,15122 | 22,86  | 4,18 |
| 1_2290 | September_2018 | 13.09.2018 | 22,59093 | 89,15045 | 24,384 | 2,13 |
| 1_2291 | September_2018 | 13.09.2018 | 22,58968 | 89,14478 | 25,908 | 1,25 |
| 1_2292 | September_2018 | 14.09.2018 | 22,57996 | 89,14016 | 18,288 | 1,48 |
| 1_2293 | September_2018 | 14.09.2018 | 22,57583 | 89,14249 | 21,336 | 3,6  |
| 1_2294 | September_2018 | 14.09.2018 | 22,57439 | 89,14158 | 18,288 | 3,72 |
| 1_2295 | September_2018 | 14.09.2018 | 22,57047 | 89,13509 | 21,336 | 4,67 |
| 1_2296 | September_2018 | 14.09.2018 | 22,57022 | 89,13661 | 19,812 | 3,94 |
| 1_2297 | September_2018 | 14.09.2018 | 22,57003 | 89,1362  | 18,288 | 7,47 |
| 1_2298 | September_2018 | 14.09.2018 | 22,61419 | 89,14757 | 15,24  | 1,44 |
| 1_2299 | September_2018 | 14.09.2018 | 22,61316 | 89,14354 | 21,336 | 1,46 |
| 1_2300 | September_2018 | 14.09.2018 | 22,61557 | 89,14166 | 18,288 | 1,19 |
| 1_2301 | September_2018 | 14.09.2018 | 22,61851 | 89,14409 | 21,336 | 0,82 |
| 1_2302 | September_2018 | 14.09.2018 | 22,61718 | 89,14931 | 24,384 | 0,89 |
| 1_2303 | September_2018 | 5.10.2018  | 22,54892 | 89,07248 | 45,72  | 3,25 |
| 1_2304 | September_2018 | 5.10.2018  | 22,54803 | 89,07047 | 48,768 | 6,03 |
| 1_2305 | September_2018 | 5.10.2018  | 22,55115 | 89,0707  | 45,72  | 3,58 |
| 1_2306 | September_2018 | 5.10.2018  | 22,55441 | 89,07225 | 48,768 | 3,35 |
| 1_2307 | September_2018 | 5.10.2018  | 22,56192 | 89,07412 | 48,768 | 3,45 |
| 1_2308 | September_2018 | 5.10.2018  | 22,60016 | 89,05708 | 54,864 | 2,02 |
| 1_2309 | September_2018 | 6.10.2018  | 22,61412 | 89,05787 | 48,768 | 3,47 |
| 1_2310 | September_2018 | 6.10.2018  | 22,6182  | 89,05901 | 45,72  | 4,22 |
| 1_2311 | September_2018 | 6.10.2018  | 22,6207  | 89,66355 | 54,864 | 2,67 |
| 1_2312 | September_2018 | 6.10.2018  | 22,62508 | 89,06747 | 51,816 | 2,65 |
| 1_2313 | September_2018 | 6.10.2018  | 22,65098 | 89,04392 | 48,768 | 0,78 |
| 1_2314 | September_2018 | 6.10.2018  | 22,65814 | 89,04254 | 51,816 | 0,77 |
| 1_2315 | September_2018 | 6.10.2018  | 22,65925 | 89,04298 | 54,864 | 0,76 |
| 1_2316 | September_2018 | 15.09.2018 | 22,69341 | 89,05882 | 54,864 | 0,39 |
| 1_2317 | September_2018 | 15.09.2018 | 22,69117 | 89,05737 | 48,768 | 0,86 |
| 1_2318 | September_2018 | 15.09.2018 | 22,69076 | 89,05587 | 51,816 | 0,89 |
| 1_2319 | September_2018 | 15.09.2018 | 22,69019 | 89,05581 | 48,768 | 0,51 |
| 1_2320 | September_2018 | 15.09.2018 | 22,68829 | 89,05527 | 51,816 | 1,66 |
| 1_2321 | September_2018 | 15.09.2018 | 22,68645 | 89,05476 | 54,864 | 0,63 |
| 1_2322 | September_2018 | 15.09.2018 | 22,68205 | 89,05289 | 54,864 | 0,68 |
| 1_2323 | September_2018 | 15.09.2018 | 22,68043 | 89,05265 | 48,768 | 0,74 |
| 1_2324 | September_2018 | 15.09.2018 | 22,67636 | 89,05732 | 51,816 | 0,71 |
| 1_2325 | September_2018 | 15.09.2018 | 22,66972 | 89,03143 | 39,624 | 0,91 |
| 1_2326 | September_2018 | 15.09.2018 | 22,6707  | 89,0317  | 42,672 | 0,88 |

|        |                |            |          |          |         |       |
|--------|----------------|------------|----------|----------|---------|-------|
| 1_2327 | September_2018 | 15.09.2018 | 22,66229 | 89,03838 | 54,864  | 0,77  |
| 1_2328 | September_2018 | 15.09.2018 | 22,61152 | 89,04381 | 51,816  | 0,88  |
| 1_2329 | September_2018 | 15.09.2018 | 22,66039 | 89,04321 | 48,768  | 0,77  |
| 1_2330 | September_2018 | 15.09.2018 | 22,65991 | 89,04231 | 41,7576 | 0,77  |
| 1_2331 | September_2018 | 20.09.2018 | 22,52526 | 89,56126 | 30,48   | 9,48  |
| 1_2332 | September_2018 | 20.09.2018 | 22,52498 | 89,56094 | 21,336  | 10,85 |
| 1_2333 | September_2018 | 20.09.2018 | 22,53435 | 89,55403 | 6,096   | 4,75  |
| 1_2334 | September_2018 | 20.09.2018 | 22,52467 | 89,54864 | 24,384  | 10,53 |
| 1_2335 | September_2018 | 20.09.2018 | 22,52936 | 89,54479 | 12,192  | 4,45  |
| 1_2336 | September_2018 | 21.09.2018 | 22,53146 | 89,54095 | 15,24   | 6,23  |
| 1_2337 | September_2018 | 21.09.2018 | 22,53906 | 89,52802 | 12,192  | 11,36 |
| 1_2338 | September_2018 | 21.09.2018 | 22,54202 | 89,52357 | 15,24   | 10,47 |
| 1_2339 | September_2018 | 21.09.2018 | 22,54398 | 89,51465 | 15,24   | 5,64  |
| 1_2340 | September_2018 | 21.09.2018 | 22,5447  | 89,51346 | 12,192  | 5,5   |
| 1_2341 | September_2018 | 21.09.2018 | 22,54788 | 89,5077  | 21,336  | 5,67  |
| 1_2342 | September_2018 | 21.09.2018 | 22,55075 | 89,50603 | 24,384  | 5,14  |
| 1_2343 | September_2018 | 21.09.2018 | 22,55227 | 89,5664  | 33,528  | 6,61  |
| 1_2344 | September_2018 | 21.09.2018 | 22,55183 | 89,50587 | 27,432  | 7,15  |
| 1_2345 | September_2018 | 16.09.2018 | 22,64449 | 89,08306 | 36,576  | 1,28  |
| 1_2346 | September_2018 | 16.09.2018 | 22,64321 | 89,08613 | 36,576  | 1,28  |
| 1_2347 | September_2018 | 16.09.2018 | 22,64315 | 89,09317 | 42,672  | 1,22  |
| 1_2348 | September_2018 | 16.09.2018 | 22,64002 | 89,10304 | 48,768  | 0,79  |
| 1_2349 | September_2018 | 16.09.2018 | 22,63511 | 89,10883 | 45,72   | 1,08  |
| 1_2350 | September_2018 | 16.09.2018 | 22,63488 | 89,12391 | 42,672  | 0,78  |
| 1_2351 | September_2018 | 16.09.2018 | 22,63494 | 89,13219 | 24,384  | 0,82  |
| 1_2352 | September_2018 | 16.09.2018 | 22,63228 | 89,13402 | 24,384  | 0,77  |
| 1_2353 | September_2018 | 16.09.2018 | 22,63177 | 89,13335 | 27,432  | 0,66  |
| 1_2354 | September_2018 | 16.09.2018 | 22,65398 | 89,13653 | 15,24   | 2,37  |
| 1_2355 | September_2018 | 28.09.2018 | 22,63289 | 89,15168 | 12,192  | 6,91  |
| 1_2356 | September_2018 | 28.09.2018 | 22,62799 | 89,15276 | 27,432  | 1,61  |
| 1_2357 | September_2018 | 28.09.2018 | 22,6471  | 89,16405 | 54,864  | 1,1   |
| 1_2358 | September_2018 | 28.09.2018 | 22,65798 | 89,17533 | 54,864  | 0,95  |
| 1_2359 | September_2018 | 28.09.2018 | 22,66186 | 89,17459 | 51,816  | 1,07  |
| 1_2360 | September_2018 | 22.09.2018 | 22,66731 | 89,17452 | 54,864  | 1,94  |
| 1_2361 | September_2018 | 22.09.2018 | 22,66602 | 89,17903 | 51,816  | 1,62  |
| 1_2362 | September_2018 | 22.09.2018 | 22,66588 | 89,18193 | 51,816  | 1,25  |
| 1_2363 | September_2018 | 22.09.2018 | 22,66455 | 89,18521 | 54,864  | 1,64  |
| 1_2364 | September_2018 | 22.09.2018 | 22,65664 | 89,19153 | 45,72   | 1,35  |
| 1_2365 | September_2018 | 22.09.2018 | 22,65452 | 89,19066 | 51,816  | 1,51  |
| 1_2366 | September_2018 | 22.09.2018 | 22,65306 | 89,19256 | 54,864  | 1,66  |
| 1_2367 | September_2018 | 22.09.2018 | 22,65337 | 89,19811 | 54,864  | 1,64  |
| 1_2368 | September_2018 | 22.09.2018 | 22,6574  | 89,19995 | 51,816  | 1,58  |
| 1_2369 | September_2018 | 23.09.2018 | 22,65836 | 89,20061 | 54,864  | 3,39  |

|        |                |            |          |          |        |      |
|--------|----------------|------------|----------|----------|--------|------|
| 1_2370 | September_2018 | 23.09.2018 | 22,67124 | 89,20936 | 51,816 | 1,67 |
| 1_2371 | September_2018 | 23.09.2018 | 22,67376 | 89,2195  | 54,864 | 2,28 |
| 1_2372 | September_2018 | 23.09.2018 | 22,67287 | 89,22035 | 51,816 | 1,28 |
| 1_2373 | September_2018 | 23.09.2018 | 22,66933 | 89,23212 | 48,768 | 2,18 |
| 1_2374 | September_2018 | 23.09.2018 | 22,66717 | 89,23509 | 51,816 | 1,72 |
| 1_2375 | September_2018 | 23.09.2018 | 22,6655  | 89,23802 | 54,864 | 1,53 |
| 1_2376 | September_2018 | 23.09.2018 | 22,66553 | 89,23836 | 57,912 | 0,84 |
| 1_2377 | September_2018 | 23.09.2018 | 22,66043 | 89,25009 | 51,816 | 1,18 |
| 1_2378 | September_2018 | 23.09.2018 | 22,66057 | 89,25256 | 54,864 | 1,19 |
| 1_2379 | September_2018 | 23.09.2018 | 22,65912 | 89,25497 | 51,816 | 1,03 |
| 1_2380 | September_2018 | 24.09.2018 | 22,66484 | 89,26261 | 54,864 | 0,75 |
| 1_2381 | September_2018 | 24.09.2018 | 22,66802 | 89,26688 | 27,432 | 0,59 |
| 1_2382 | September_2018 | 24.09.2018 | 22,6689  | 89,26849 | 27,432 | 0,58 |
| 1_2383 | September_2018 | 24.09.2018 | 22,66992 | 89,27411 | 27,432 | 0,49 |
| 1_2384 | September_2018 | 24.09.2018 | 22,67261 | 89,27813 | 27,432 | 0,61 |
| 1_2385 | September_2018 | 24.09.2018 | 22,67141 | 89,28235 | 24,384 | 0,51 |
| 1_2386 | September_2018 | 24.09.2018 | 22,67176 | 89,28579 | 27,432 | 0,43 |
| 1_2387 | September_2018 | 24.09.2018 | 22,67094 | 89,28856 | 24,384 | 0,39 |
| 1_2388 | September_2018 | 24.09.2018 | 22,67081 | 89,29045 | 24,384 | 0,36 |
| 1_2389 | September_2018 | 24.09.2018 | 22,67027 | 89,29387 | 24,384 | 0,33 |
| 1_2390 | September_2018 | 25.09.2018 | 22,67047 | 89,29652 | 24,384 | 0,51 |
| 1_2391 | September_2018 | 25.09.2018 | 22,67489 | 89,29841 | 27,432 | 0,46 |
| 1_2392 | September_2018 | 25.09.2018 | 22,67071 | 89,31541 | 27,432 | 1,38 |
| 1_2393 | September_2018 | 25.09.2018 | 22,66874 | 89,31135 | 21,336 | 1,13 |
| 1_2394 | September_2018 | 25.09.2018 | 22,66695 | 89,3098  | 27,432 | 1,33 |
| 1_2395 | September_2018 | 25.09.2018 | 22,66507 | 89,3083  | 24,384 | 1,45 |
| 1_2396 | September_2018 | 25.09.2018 | 22,66428 | 89,31241 | 27,432 | 1,74 |
| 1_2397 | September_2018 | 25.09.2018 | 22,66515 | 89,3179  | 27,432 | 1,38 |
| 1_2398 | September_2018 | 25.09.2018 | 22,66532 | 89,32103 | 33,528 | 1,36 |
| 1_2399 | September_2018 | 25.09.2018 | 22,66536 | 89,32673 | 27,432 | 2,77 |
| 1_2400 | September_2018 | 26.09.2018 | 22,66336 | 89,33838 | 33,528 | 2,7  |
| 1_2401 | September_2018 | 26.09.2018 | 22,66473 | 89,3432  | 27,432 | 2,18 |
| 1_2402 | September_2018 | 26.09.2018 | 22,66751 | 89,34731 | 42,672 | 1,91 |
| 1_2403 | September_2018 | 26.09.2018 | 22,66717 | 89,3515  | 42,672 | 2,26 |
| 1_2404 | September_2018 | 26.09.2018 | 22,66958 | 89,3577  | 48,768 | 1,98 |
| 1_2405 | September_2018 | 26.09.2018 | 22,66244 | 89,36197 | 54,864 | 1,57 |
| 1_2406 | September_2018 | 26.09.2018 | 22,65857 | 89,36193 | 48,768 | 1,75 |
| 1_2407 | September_2018 | 26.09.2018 | 22,65165 | 89,36    | 48,768 | 1,6  |
| 1_2408 | September_2018 | 26.09.2018 | 22,64707 | 89,36511 | 45,72  | 2,29 |
| 1_2409 | September_2018 | 26.09.2018 | 22,64753 | 89,36723 | 48,768 | 3,38 |
| 1_2410 | September_2018 | 26.09.2018 | 22,65116 | 89,36832 | 45,72  | 2,05 |
| 1_2411 | September_2018 | 27.09.2018 | 22,43502 | 89,0861  | 45,72  | 0,33 |
| 1_2412 | September_2018 | 27.09.2018 | 22,43377 | 89,09605 | 45,72  | 0,28 |

|        |                |            |          |          |        |         |      |
|--------|----------------|------------|----------|----------|--------|---------|------|
| 1_2413 | September_2018 | 27.09.2018 | 22,43562 | 89,09873 | 18,288 | 0,26    |      |
| 1_2414 | September_2018 | 1.10.2018  | 22,43933 | 89,09996 | 18,288 | 0,3     |      |
| 1_2415 | September_2018 | 1.10.2018  | 22,4408  | 89,10446 | 21,336 | 0,22    |      |
| 1_2416 | September_2018 | 1.10.2018  | 22,44213 | 89,10596 | 18,288 | 0,26    |      |
| 1_2417 | September_2018 | 1.10.2018  | 22,44148 | 89,10859 | 15,24  | 0,24    |      |
| 1_2418 | September_2018 | 1.10.2018  | 22,44435 | 89,11444 | 18,288 | 0,34    |      |
| 1_2419 | September_2018 | 1.10.2018  | 22,44407 | 89,12058 | 18,288 | 0,27    |      |
| 1_2420 | September_2018 | 1.10.2018  | 22,44741 | 89,12879 | 18,288 | 2,25    |      |
| 1_2421 | September_2018 | 1.10.2018  | 22,44811 | 89,15287 | 48,768 | 1,84    |      |
| 1_2422 | September_2018 | 2.10.2018  | 22,44856 | 89,15502 | 51,816 | 4,44    |      |
| 1_2423 | September_2018 | 2.10.2018  | 22,46045 | 89,19252 | 48,768 | 2,13    |      |
| 1_2424 | September_2018 | 2.10.2018  | 22,4638  | 89,20243 | 27,432 | 2,25    |      |
| 1_2425 | September_2018 | 3.10.2018  | 22,46038 | 89,21128 | 18,288 | 6,59    |      |
| 1_2426 | September_2018 | 3.10.2018  | 22,45506 | 89,21199 | 21,336 | 6,97    |      |
| 1_2427 | September_2018 | 3.10.2018  | 22,45358 | 89,2154  | 21,336 | 4,09    |      |
| 1_2428 | September_2018 | 3.10.2018  | 22,45406 | 89,21849 | 18,288 | 2,7     |      |
| 1_2429 | September_2018 | 3.10.2018  | 22,46162 | 89,25246 | 51,816 | 2,59    |      |
| 1_2430 | September_2018 | 3.10.2018  | 22,46644 | 89,25494 | 54,864 | 2,73    |      |
| 1_2431 | September_2018 | 3.10.2018  | 22,4684  | 89,25758 | 57,912 | 4,07    |      |
| 1_2432 | September_2018 | 3.10.2018  | 22,47091 | 89,26885 | 18,288 | 1,06    |      |
| 1_2433 | September_2018 | 3.10.2018  | 22,47102 | 89,26947 | 13,716 | 1,25    |      |
| 1_2434 | September_2018 | 4.10.2018  | 22,47159 | 89,26997 | 15,24  | 0,69    |      |
| 1_2435 | September_2018 | 4.10.2018  | 22,47296 | 89,2893  | 18,288 | 3,11    |      |
| 1_2436 | September_2018 | 4.10.2018  | 22,47635 | 89,28968 | 27,432 | 3,3     |      |
| 1_2437 | September_2018 | 4.10.2018  | 22,47699 | 89,29369 | 53,34  | 3,14    |      |
| 1_2438 | September_2018 | 4.10.2018  | 22,48612 | 89,30443 | 36,576 | 1,93    |      |
| 1_2439 | September_2018 | 4.10.2018  | 22,48564 | 89,30398 | 39,624 | 2,37    |      |
| 1_2440 | September_2018 | 4.10.2018  | 22,48766 | 89,31348 | 42,672 | 2,08    |      |
| 1_2441 | BGS_database   | 29/03/1998 | 22,305   | 89,111   | 7      | 1,8953  | 346  |
| 1_2442 | BGS_database   | 29/03/1998 | 22,333   | 89,04    | 9      | 1,3981  | 120  |
| 1_2443 | BGS_database   | 29/03/1998 | 22,366   | 89,071   | 9      | 2,6697  | 698  |
| 1_2444 | BGS_database   | 30/03/1998 | 22,606   | 89,85    | 9      | 2,6631  | 695  |
| 1_2445 | BGS_database   | 30/03/1998 | 22,263   | 89,834   | 10     | 2,0757  | 428  |
| 1_2446 | BGS_database   | 30/03/1998 | 22,287   | 89,844   | 10     | 2,1923  | 481  |
| 1_2447 | BGS_database   | 30/03/1998 | 22,311   | 89,846   | 10     | 1,6401  | 230  |
| 1_2448 | BGS_database   | 31/03/1998 | 22,313   | 89,854   | 10     | 1,31648 | 82,9 |
| 1_2449 | BGS_database   | 27/03/1998 | 22,49    | 89,059   | 10     | 1,9283  | 361  |
| 1_2450 | BGS_database   | 27/03/1998 | 22,455   | 89,028   | 11     | 1,5697  | 198  |
| 1_2451 | BGS_database   | 27/03/1998 | 22,628   | 89,122   | 12     | 1,19504 | 27,7 |
| 1_2452 | BGS_database   | 29/03/1998 | 22,343   | 89,112   | 13     | 1,8733  | 336  |
| 1_2453 | BGS_database   | 30/03/1998 | 22,456   | 89,859   | 13     | 1,8513  | 326  |
| 1_2454 | BGS_database   | 01/04/1998 | 22,469   | 89,605   | 13     | 3,7521  | 1190 |
| 1_2455 | BGS_database   | 01/04/1998 | 22,532   | 89,59    | 13     | 3,6421  | 1140 |

|        |              |            |        |        |    |         |      |
|--------|--------------|------------|--------|--------|----|---------|------|
| 1_2456 | BGS_database | 29/03/1998 | 22,535 | 89,12  | 13 | 1,7721  | 290  |
| 1_2457 | BGS_database | 01/04/1998 | 22,579 | 89,665 | 14 | 2,6037  | 668  |
| 1_2458 | BGS_database | 30/03/1998 | 22,689 | 89,865 | 14 | 1,35278 | 99,4 |
| 1_2459 | BGS_database | 29/03/1998 | 22,365 | 89,086 | 15 | 1,23222 | 44,6 |
| 1_2460 | BGS_database | 27/03/1998 | 22,376 | 89,031 | 15 | 1,4179  | 129  |
| 1_2461 | BGS_database | 01/04/1998 | 22,597 | 89,641 | 15 | 2,8303  | 771  |
| 1_2462 | BGS_database | 31/03/1998 | 22,704 | 89,688 | 15 | 1,28722 | 69,6 |
| 1_2463 | BGS_database | 01/04/1998 | 22,476 | 89,597 | 16 | 3,1075  | 897  |
| 1_2464 | BGS_database | 25/03/1998 | 22,672 | 89,618 | 16 | 1,1682  | 15,5 |
| 1_2465 | BGS_database | 25/03/1998 | 22,751 | 89,714 | 16 | 1,17194 | 17,2 |
| 1_2466 | BGS_database | 01/04/1998 | 22,55  | 89,59  | 18 | 3,3077  | 988  |
| 1_2467 | BGS_database | 30/03/1998 | 22,608 | 89,844 | 18 | 1,4047  | 123  |
| 1_2468 | BGS_database | 31/03/1998 | 22,722 | 89,847 | 18 | 1,6533  | 236  |
| 1_2469 | BGS_database | 31/03/1998 | 22,898 | 89,81  | 18 | 1,3849  | 114  |
| 1_2470 | BGS_database | 31/03/1998 | 22,902 | 89,768 | 18 | 1,6775  | 247  |
| 1_2471 | BGS_database | 31/03/1998 | 22,715 | 89,667 | 19 | 1,2243  | 41   |
| 1_2472 | BGS_database | 31/03/1998 | 22,86  | 89,877 | 19 | 1,22914 | 43,2 |
| 1_2473 | BGS_database | 27/03/1998 | 22,435 | 89,095 | 20 | 1,16644 | 14,7 |
| 1_2474 | BGS_database | 27/03/1998 | 22,483 | 89,011 | 20 | 1,21726 | 37,8 |
| 1_2475 | BGS_database | 30/03/1998 | 22,487 | 89,866 | 20 | 2,0449  | 414  |
| 1_2476 | BGS_database | 27/03/1998 | 22,52  | 89,021 | 20 | 1,19592 | 28,1 |
| 1_2477 | BGS_database | 30/03/1998 | 22,561 | 89,863 | 20 | 1,7897  | 298  |
| 1_2478 | BGS_database | 30/03/1998 | 22,565 | 89,845 | 20 | 1,8601  | 330  |
| 1_2479 | BGS_database | 31/03/1998 | 22,642 | 89,814 | 20 | 1,7919  | 299  |
| 1_2480 | BGS_database | 31/03/1998 | 22,791 | 89,876 | 20 | 1,309   | 79,5 |
| 1_2481 | BGS_database | 24/03/1998 | 22,823 | 89,331 | 20 | 1,16974 | 16,2 |
| 1_2482 | BGS_database | 30/03/1998 | 22,602 | 89,887 | 21 | 2,0471  | 415  |
| 1_2483 | BGS_database | 24/03/1998 | 22,633 | 89,52  | 21 | 3,0283  | 861  |
| 1_2484 | BGS_database | 31/03/1998 | 22,803 | 89,901 | 21 | 1,1726  | 17,5 |
| 1_2485 | BGS_database | 31/03/1998 | 22,855 | 89,819 | 21 | 1,31736 | 83,3 |
| 1_2486 | BGS_database | 23/03/1998 | 22,9   | 89,656 | 21 | 1,2551  | 55   |
| 1_2487 | BGS_database | 24/03/1998 | 22,617 | 89,317 | 22 | 1,26324 | 58,7 |
| 1_2488 | BGS_database | 01/04/1998 | 22,629 | 89,61  | 22 | 2,3771  | 565  |
| 1_2489 | BGS_database | 28/03/1998 | 22,75  | 89,259 | 22 | 1,18866 | 24,8 |
| 1_2490 | BGS_database | 31/03/1998 | 22,782 | 89,877 | 22 | 2,3155  | 537  |
| 1_2491 | BGS_database | 23/03/1998 | 22,915 | 89,625 | 22 | 1,34332 | 95,1 |
| 1_2492 | BGS_database | 01/04/1998 | 22,642 | 89,643 | 23 | 2,5597  | 648  |
| 1_2493 | BGS_database | 25/03/1998 | 22,709 | 89,635 | 23 | 1,16974 | 16,2 |
| 1_2494 | BGS_database | 27/03/1998 | 22,711 | 89,107 | 23 | 1,5631  | 195  |
| 1_2495 | BGS_database | 31/03/1998 | 22,869 | 89,748 | 23 | 2,2517  | 508  |
| 1_2496 | BGS_database | 27/03/1998 | 22,392 | 89,015 | 24 | 2,5949  | 664  |
| 1_2497 | BGS_database | 01/04/1998 | 22,575 | 89,659 | 24 | 2,4079  | 579  |
| 1_2498 | BGS_database | 30/03/1998 | 22,651 | 89,882 | 24 | 2,5047  | 623  |

|        |              |            |        |        |    |         |      |
|--------|--------------|------------|--------|--------|----|---------|------|
| 1_2499 | BGS_database | 30/03/1998 | 22,666 | 89,876 | 24 | 1,5543  | 191  |
| 1_2500 | BGS_database | 01/04/1998 | 22,677 | 89,652 | 24 | 1,4443  | 141  |
| 1_2501 | BGS_database | 27/03/1998 | 22,703 | 89,073 | 24 | 1,2914  | 71,5 |
| 1_2502 | BGS_database | 23/03/1998 | 22,87  | 89,634 | 24 | 1,28128 | 66,9 |
| 1_2503 | BGS_database | 30/03/1998 | 22,601 | 89,893 | 25 | 1,4839  | 159  |
| 1_2504 | BGS_database | 01/04/1998 | 22,664 | 89,783 | 25 | 1,1792  | 20,5 |
| 1_2505 | BGS_database | 31/03/1998 | 22,82  | 89,874 | 25 | 1,2441  | 50   |
| 1_2506 | BGS_database | 31/03/1998 | 22,841 | 89,849 | 25 | 1,4135  | 127  |
| 1_2507 | BGS_database | 31/03/1998 | 22,927 | 89,81  | 25 | 1,17392 | 18,1 |
| 1_2508 | BGS_database | 13/04/1998 | 22,982 | 89,479 | 25 | 2,9447  | 823  |
| 1_2509 | BGS_database | 01/04/1998 | 22,546 | 89,652 | 26 | 1,4135  | 127  |
| 1_2510 | BGS_database | 28/03/1998 | 22,564 | 88,981 | 26 | 1,4707  | 153  |
| 1_2511 | BGS_database | 24/03/1998 | 22,716 | 89,581 | 26 | 1,6049  | 214  |
| 1_2512 | BGS_database | 23/03/1998 | 22,932 | 89,668 | 26 | 1,5763  | 201  |
| 1_2513 | BGS_database | 30/03/1998 | 22,583 | 89,959 | 29 | 1,34156 | 94,3 |
| 1_2514 | BGS_database | 31/03/1998 | 22,663 | 89,774 | 29 | 1,16072 | 12,1 |
| 1_2515 | BGS_database | 31/03/1998 | 22,747 | 89,84  | 29 | 1,9415  | 367  |
| 1_2516 | BGS_database | 31/03/1998 | 22,857 | 89,872 | 29 | 1,4399  | 139  |
| 1_2517 | BGS_database | 01/04/1998 | 22,662 | 89,798 | 30 | 1,23156 | 44,3 |
| 1_2518 | BGS_database | 27/03/1998 | 22,703 | 89,054 | 30 | 1,2419  | 49   |
| 1_2519 | BGS_database | 01/04/1998 | 22,732 | 89,754 | 30 | 1,7259  | 269  |
| 1_2520 | BGS_database | 27/03/1998 | 22,745 | 88,925 | 30 | 1,4443  | 141  |
| 1_2521 | BGS_database | 25/03/1998 | 22,8   | 89,643 | 30 | 1,14488 | 4,9  |
| 1_2522 | BGS_database | 28/03/1998 | 22,576 | 88,965 | 31 | 1,3156  | 82,5 |
| 1_2523 | BGS_database | 25/03/1998 | 22,739 | 89,652 | 31 | 1,19658 | 28,4 |
| 1_2524 | BGS_database | 28/03/1998 | 22,873 | 89,084 | 31 | 1,2067  | 33   |
| 1_2525 | BGS_database | 24/03/1998 | 22,587 | 89,518 | 33 | 4,2581  | 1420 |
| 1_2526 | BGS_database | 27/03/1998 | 22,811 | 89,038 | 34 | 1,17062 | 16,6 |
| 1_2527 | BGS_database | 31/03/1998 | 22,824 | 89,748 | 34 | 1,2078  | 33,5 |
| 1_2528 | BGS_database | 28/03/1998 | 22,558 | 89,007 | 35 | 1,24916 | 52,3 |
| 1_2529 | BGS_database | 27/03/1998 | 22,751 | 89,02  | 36 | 1,15654 | 10,2 |
| 1_2530 | BGS_database | 25/03/1998 | 22,78  | 89,726 | 36 | 1,31692 | 83,1 |
| 1_2531 | BGS_database | 28/03/1998 | 22,765 | 89,143 | 38 | 1,2342  | 45,5 |
| 1_2532 | BGS_database | 28/03/1998 | 22,639 | 89,041 | 39 | 1,7457  | 278  |
| 1_2533 | BGS_database | 28/03/1998 | 22,679 | 89,256 | 39 | 1,7479  | 279  |
| 1_2534 | BGS_database | 27/03/1998 | 22,683 | 89,024 | 39 | 1,29448 | 72,9 |
| 1_2535 | BGS_database | 25/03/1998 | 22,778 | 89,706 | 39 | 1,1704  | 16,5 |
| 1_2536 | BGS_database | 26/03/1998 | 22,855 | 89,542 | 39 | 1,7281  | 270  |
| 1_2537 | BGS_database | 28/03/1998 | 22,86  | 89,04  | 39 | 1,2133  | 36   |
| 1_2538 | BGS_database | 26/03/1998 | 22,883 | 89,518 | 39 | 1,8117  | 308  |
| 1_2539 | BGS_database | 28/03/1998 | 22,923 | 89,096 | 39 | 1,16468 | 13,9 |
| 1_2540 | BGS_database | 24/03/1998 | 22,63  | 89,515 | 40 | 3,0525  | 872  |
| 1_2541 | BGS_database | 24/03/1998 | 22,576 | 89,499 | 41 | 6,5461  | 2460 |

|        |              |            |        |        |    |         |      |
|--------|--------------|------------|--------|--------|----|---------|------|
| 1_2542 | BGS_database | 25/03/1998 | 22,71  | 89,306 | 41 | 1,15324 | 8,7  |
| 1_2543 | BGS_database | 28/03/1998 | 22,795 | 89,12  | 41 | 1,17568 | 18,9 |
| 1_2544 | BGS_database | 29/03/1998 | 22,305 | 89,11  | 43 | 5,4241  | 1950 |
| 1_2545 | BGS_database | 27/03/1998 | 22,693 | 88,985 | 43 | 1,21814 | 38,2 |
| 1_2546 | BGS_database | 24/03/1998 | 22,698 | 89,434 | 43 | 1,7941  | 300  |
| 1_2547 | BGS_database | 27/03/1998 | 22,826 | 89,011 | 43 | 1,26962 | 61,6 |
| 1_2548 | BGS_database | 28/03/1998 | 22,607 | 88,999 | 44 | 1,34354 | 95,2 |
| 1_2549 | BGS_database | 27/03/1998 | 22,711 | 89,107 | 44 | 1,19988 | 29,9 |
| 1_2550 | BGS_database | 23/03/1998 | 22,753 | 89,419 | 44 | 2,2737  | 518  |
| 1_2551 | BGS_database | 28/03/1998 | 22,917 | 89,014 | 44 | 1,18184 | 21,7 |
| 1_2552 | BGS_database | 28/03/1998 | 22,605 | 88,961 | 45 | 2,1571  | 465  |
| 1_2553 | BGS_database | 25/03/1998 | 22,659 | 89,334 | 45 | 2,3111  | 535  |
| 1_2554 | BGS_database | 28/03/1998 | 22,733 | 89,297 | 45 | 1,17612 | 19,1 |
| 1_2555 | BGS_database | 31/03/1998 | 22,763 | 89,855 | 45 | 1,9305  | 362  |
| 1_2556 | BGS_database | 27/03/1998 | 22,57  | 89,076 | 46 | 1,18602 | 23,6 |
| 1_2557 | BGS_database | 29/03/1998 | 22,615 | 89,15  | 46 | 1,2133  | 36   |
| 1_2558 | BGS_database | 28/03/1998 | 22,836 | 89,011 | 46 | 1,24058 | 48,4 |
| 1_2559 | BGS_database | 28/03/1998 | 22,901 | 88,949 | 46 | 1,17194 | 17,2 |
| 1_2560 | BGS_database | 28/03/1998 | 22,782 | 89,251 | 48 | 1,17084 | 16,7 |
| 1_2561 | BGS_database | 25/03/1998 | 22,576 | 89,325 | 49 | 2,2627  | 513  |
| 1_2562 | BGS_database | 28/03/1998 | 22,721 | 89,207 | 49 | 1,6599  | 239  |
| 1_2563 | BGS_database | 28/03/1998 | 22,778 | 89,205 | 49 | 1,6005  | 212  |
| 1_2564 | BGS_database | 26/03/1998 | 22,865 | 89,525 | 49 | 1,9965  | 392  |
| 1_2565 | BGS_database | 23/03/1998 | 22,984 | 89,446 | 49 | 1,7985  | 302  |
| 1_2566 | BGS_database | 25/03/1998 | 22,624 | 89,304 | 50 | 1,17458 | 18,4 |
| 1_2567 | BGS_database | 24/03/1998 | 22,567 | 89,322 | 51 | 1,9437  | 368  |
| 1_2568 | BGS_database | 28/03/1998 | 22,841 | 88,974 | 52 | 1,19042 | 25,6 |
| 1_2569 | BGS_database | 24/03/1998 | 22,825 | 89,274 | 53 | 1,1682  | 15,5 |
| 1_2570 | BGS_database | 23/03/1998 | 22,918 | 89,569 | 53 | 2,0845  | 432  |
| 1_2571 | BGS_database | 24/03/1998 | 22,689 | 89,571 | 54 | 1,5917  | 208  |
| 1_2572 | BGS_database | 25/03/1998 | 22,84  | 89,559 | 54 | 2,2935  | 527  |
| 1_2573 | BGS_database | 24/03/1998 | 22,861 | 89,422 | 54 | 1,7193  | 266  |
| 1_2574 | BGS_database | 26/03/1998 | 22,862 | 89,542 | 54 | 1,6863  | 251  |
| 1_2575 | BGS_database | 23/03/1998 | 22,912 | 89,499 | 54 | 1,6511  | 235  |
| 1_2576 | BGS_database | 23/03/1998 | 22,944 | 89,478 | 54 | 1,8755  | 337  |
| 1_2577 | BGS_database | 23/03/1998 | 22,989 | 89,462 | 54 | 1,27798 | 65,4 |
| 1_2578 | BGS_database | 29/03/1998 | 22,504 | 89,199 | 55 | 2,4167  | 583  |
| 1_2579 | BGS_database | 23/03/1998 | 22,887 | 89,535 | 55 | 1,21506 | 36,8 |
| 1_2580 | BGS_database | 23/03/1998 | 22,981 | 89,456 | 55 | 2,2561  | 510  |
| 1_2581 | BGS_database | 29/03/1998 | 22,538 | 89,24  | 56 | 2,3947  | 573  |
| 1_2582 | BGS_database | 23/03/1998 | 22,862 | 89,556 | 56 | 1,6401  | 230  |
| 1_2583 | BGS_database | 29/03/1998 | 22,414 | 89,217 | 59 | 2,0053  | 396  |
| 1_2584 | BGS_database | 23/03/1998 | 22,819 | 89,421 | 59 | 1,9723  | 381  |



|        |              |            |        |        |    |        |     |
|--------|--------------|------------|--------|--------|----|--------|-----|
| 1_2585 | BGS_database | 23/03/1998 | 22,959 | 89,556 | 59 | 1,8051 | 305 |
| 1_2586 | BGS_database | 23/03/1998 | 22,871 | 89,508 | 60 | 2,9029 | 804 |

### Salinity 60-100 m

| ID   | Data_sourc    | date       | Lat      | Long     | Depth_ft | Depth_m | EC   | Na_mg/L |
|------|---------------|------------|----------|----------|----------|---------|------|---------|
| 2_1  | Abir_nov_2015 | 16/11/2015 | 22,59377 | 89,50733 | 210      | 64,008  | 6,82 |         |
| 2_2  | Abir_nov_2015 | 18/11/2015 | 22,94989 | 89,47842 | 220      | 67,056  | 1,38 |         |
| 2_3  | Abir_nov_2015 | 18/11/2015 | 22,9338  | 89,40205 | 250      | 76,2    | 4,24 |         |
| 2_4  | Abir_nov_2015 | 19/11/2015 | 22,86094 | 89,54126 | 200      | 60,96   | 2,63 |         |
| 2_5  | Abir_nov_2015 | 19/11/2015 | 22,86141 | 89,5412  | 200      | 60,96   | 1,08 |         |
| 2_6  | Abir_nov_2015 | 19/11/2015 | 22,86142 | 89,54121 | 200      | 60,96   | 1,03 |         |
| 2_7  | Abir_nov_2015 | 19/11/2015 | 22,86166 | 89,54118 | 200      | 60,96   | 0,97 |         |
| 2_8  | Abir_nov_2015 | 19/11/2015 | 22,86154 | 89,54092 | 200      | 60,96   | 0,96 |         |
| 2_9  | Abir_nov_2015 | 19/11/2015 | 22,86153 | 89,54082 | 200      | 60,96   | 1,3  |         |
| 2_10 | Abir_nov_2015 | 19/11/2015 | 22,86143 | 89,54081 | 200      | 60,96   | 2,6  |         |
| 2_11 | Abir_nov_2015 | 19/11/2015 | 22,8612  | 89,54265 | 200      | 60,96   | 0,99 |         |
| 2_12 | Abir_nov_2015 | 19/11/2015 | 22,86135 | 89,54237 | 200      | 60,96   | 2,65 |         |
| 2_13 | Abir_nov_2015 | 19/11/2015 | 22,86149 | 89,54237 | 200      | 60,96   | 1    |         |
| 2_14 | Abir_nov_2015 | 19/11/2015 | 22,86043 | 89,54188 | 200      | 60,96   | 3,8  |         |
| 2_15 | Abir_nov_2015 | 19/11/2015 | 22,86078 | 89,54182 | 200      | 60,96   | 3,96 |         |
| 2_16 | Abir_nov_2015 | 19/11/2015 | 22,86064 | 89,54254 | 200      | 60,96   | 4,58 |         |
| 2_17 | Abir_nov_2015 | 19/11/2015 | 22,86176 | 89,53622 | 200      | 60,96   | 2,17 |         |
| 2_18 | Abir_nov_2015 | 19/11/2015 | 22,85028 | 89,54531 | 220      | 67,056  | 4,78 |         |
| 2_19 | Abir_nov_2015 | 25/11/2015 | 22,89366 | 89,51144 | 200      | 60,96   | 1,37 |         |
| 2_20 | Abir_nov_2015 | 25/11/2015 | 22,89181 | 89,50961 | 260      | 79,248  | 1,14 |         |
| 2_21 | Abir_nov_2015 | 25/11/2015 | 22,89213 | 89,50813 | 200      | 60,96   | 1,11 |         |
| 2_22 | Abir_nov_2015 | 25/11/2015 | 22,89228 | 89,50814 | 200      | 60,96   | 1,04 |         |
| 2_23 | Abir_nov_2015 | 25/11/2015 | 22,89169 | 89,50821 | 200      | 60,96   | 1,08 |         |
| 2_24 | Abir_nov_2015 | 25/11/2015 | 22,89303 | 89,50864 | 200      | 60,96   | 1,18 |         |
| 2_25 | Abir_nov_2015 | 25/11/2015 | 22,89405 | 89,50912 | 200      | 60,96   | 1,21 |         |
| 2_26 | Abir_nov_2015 | 25/11/2015 | 22,89607 | 89,50961 | 200      | 60,96   | 1,4  |         |
| 2_27 | Abir_nov_2015 | 25/11/2015 | 22,90053 | 89,50061 | 200      | 60,96   | 3,42 |         |
| 2_28 | Abir_nov_2015 | 25/11/2015 | 22,90053 | 89,50061 | 200      | 60,96   | 4,35 |         |
| 2_29 | Abir_nov_2015 | 25/11/2015 | 22,90053 | 89,50061 | 200      | 60,96   | 4,32 |         |
| 2_30 | Abir_nov_2015 | 25/11/2015 | 22,90053 | 89,50061 | 200      | 60,96   | 3,94 |         |
| 2_31 | Abir_nov_2015 | 25/11/2015 | 22,90053 | 89,50061 | 200      | 60,96   | 4,91 |         |
| 2_32 | Abir_nov_2015 | 25/11/2015 | 22,90153 | 89,50137 | 200      | 60,96   | 1,8  |         |
| 2_33 | Abir_nov_2015 | 25/11/2015 | 22,90298 | 89,50262 | 200      | 60,96   | 1,49 |         |
| 2_34 | Abir_nov_2015 | 25/11/2015 | 22,90314 | 89,50214 | 200      | 60,96   | 1,65 |         |
| 2_35 | Abir_nov_2015 | 25/11/2015 | 22,89735 | 89,49413 | 200      | 60,96   | 1,85 |         |
| 2_36 | Abir_nov_2015 | 25/11/2015 | 22,89589 | 89,49029 | 200      | 60,96   | 8,43 |         |
| 2_37 | Abir_nov_2015 | 25/11/2015 | 22,89501 | 89,4901  | 200      | 60,96   | 8,33 |         |
| 2_38 | Abir_nov_2015 | 25/11/2015 | 22,88927 | 89,48797 | 245      | 74,676  | 9,03 |         |
| 2_39 | Abir_nov_2015 | 25/11/2015 | 22,88925 | 89,49201 | 320      | 97,536  | 6,23 |         |
| 2_40 | Abir_nov_2015 | 26/11/2015 | 22,98833 | 89,4499  | 235      | 71,628  | 1,3  |         |
| 2_41 | Abir_nov_2015 | 26/11/2015 | 23,00784 | 89,45854 | 255      | 77,724  | 3,33 |         |

|      |               |            |          |          |     |        |      |
|------|---------------|------------|----------|----------|-----|--------|------|
| 2_42 | Abir_nov_2015 | 26/11/2015 | 23,00787 | 89,45859 | 200 | 60,96  | 1,28 |
| 2_43 | Abir_nov_2015 | 26/11/2015 | 23,00725 | 89,45774 | 200 | 60,96  | 1,08 |
| 2_44 | Abir_nov_2015 | 26/11/2015 | 22,99419 | 89,46147 | 235 | 71,628 | 1,07 |
| 2_45 | Abir_nov_2015 | 28/12/2015 | 22,89368 | 89,49413 | 215 | 65,532 | 2,32 |
| 2_46 | Abir_nov_2015 | 28/12/2015 | 22,88984 | 89,49591 | 210 | 64,008 | 5,33 |
| 2_47 | Abir_nov_2015 | 28/12/2015 | 22,88811 | 89,50412 | 210 | 64,008 | 2,3  |
| 2_48 | Abir_nov_2015 | 28/12/2015 | 22,88764 | 89,50414 | 210 | 64,008 | 1,59 |
| 2_49 | Abir_nov_2015 | 28/12/2015 | 22,88504 | 89,50858 | 210 | 64,008 | 1,73 |
| 2_50 | Abir_nov_2015 | 28/12/2015 | 22,87799 | 89,51492 | 210 | 64,008 | 2,17 |
| 2_51 | Abir_nov_2015 | 28/12/2015 | 22,87776 | 89,51458 | 210 | 64,008 | 2,46 |
| 2_52 | Abir_nov_2015 | 28/12/2015 | 22,87801 | 89,51447 | 210 | 64,008 | 2,3  |
| 2_53 | Abir_nov_2015 | 29/12/2015 | 22,81128 | 89,53593 | 200 | 60,96  | 8,08 |
| 2_54 | Abir_nov_2015 | 30/12/2015 | 22,85568 | 89,52914 | 210 | 64,008 | 4,12 |
| 2_55 | Abir_nov_2015 | 30/12/2015 | 22,86429 | 89,52874 | 210 | 64,008 | 1,8  |
| 2_56 | Abir_nov_2015 | 30/12/2015 | 22,86591 | 89,52531 | 210 | 64,008 | 1,23 |
| 2_57 | Abir_nov_2015 | 06/01/2016 | 22,88985 | 89,49506 | 200 | 60,96  | 6,76 |
| 2_58 | Abir_nov_2015 | 06/01/2016 | 22,88343 | 89,50422 | 200 | 60,96  | 3,66 |
| 2_59 | Abir_nov_2015 | 06/01/2016 | 22,88355 | 89,50383 | 200 | 60,96  | 3,57 |
| 2_60 | Abir_nov_2015 | 06/01/2016 | 22,88373 | 89,50369 | 200 | 60,96  | 3,26 |
| 2_61 | Abir_nov_2015 | 06/01/2016 | 22,88385 | 89,50383 | 200 | 60,96  | 3,75 |
| 2_62 | Abir_nov_2015 | 07/01/2016 | 22,78907 | 89,58849 | 250 | 76,2   | 2,58 |
| 2_63 | Abir_nov_2015 | 07/01/2016 | 22,80063 | 89,58667 | 300 | 91,44  | 3,58 |
| 2_64 | Abir_nov_2015 | 07/01/2016 | 22,77624 | 89,59777 | 200 | 60,96  | 1,83 |
| 2_65 | Abir_nov_2015 | 07/01/2016 | 22,76474 | 89,59869 | 200 | 60,96  | 2,68 |
| 2_66 | Abir_nov_2015 | 07/01/2016 | 22,76461 | 89,59854 | 200 | 60,96  | 2,29 |
| 2_67 | Abir_nov_2015 | 07/01/2016 | 22,77209 | 89,58776 | 200 | 60,96  | 2,44 |
| 2_68 | Abir_nov_2015 | 04/02/2016 | 22,61345 | 89,49377 | 210 | 64,008 | 6,12 |
| 2_69 | Abir_nov_2015 | 06/02/2016 | 22,89497 | 89,50469 | 200 | 60,96  | 4,64 |
| 2_70 | Abir_nov_2015 | 06/02/2016 | 22,89499 | 89,50473 | 210 | 64,008 | 4,35 |
| 2_71 | Abir_nov_2015 | 06/02/2016 | 22,89405 | 89,50427 | 200 | 60,96  | 3,5  |
| 2_72 | Abir_nov_2015 | 06/02/2016 | 22,89492 | 89,5059  | 200 | 60,96  | 3,98 |
| 2_73 | Abir_nov_2015 | 06/02/2016 | 22,89473 | 89,50582 | 200 | 60,96  | 3,28 |
| 2_74 | Abir_nov_2015 | 06/02/2016 | 22,89461 | 89,50585 | 200 | 60,96  | 3,13 |
| 2_75 | Abir_nov_2015 | 06/02/2016 | 22,89243 | 89,50616 | 210 | 64,008 | 1,55 |
| 2_76 | Abir_nov_2015 | 06/02/2016 | 22,89249 | 89,50604 | 200 | 60,96  | 1,34 |
| 2_77 | Abir_nov_2015 | 06/02/2016 | 22,89173 | 89,50601 | 200 | 60,96  | 1,44 |
| 2_78 | Abir_nov_2015 | 06/02/2016 | 22,89042 | 89,50594 | 210 | 64,008 | 2,93 |
| 2_79 | Abir_nov_2015 | 06/02/2016 | 22,89031 | 89,50587 | 200 | 60,96  | 1,77 |
| 2_80 | Abir_nov_2015 | 06/02/2016 | 22,89645 | 89,48732 | 250 | 76,2   | 2,87 |
| 2_81 | Abir_nov_2015 | 06/02/2016 | 22,89601 | 89,48561 | 200 | 60,96  | 3,2  |
| 2_82 | Abir_nov_2015 | 06/02/2016 | 22,90071 | 89,4888  | 200 | 60,96  | 3,1  |
| 2_83 | Abir_nov_2015 | 13/03/2016 | 22,83959 | 89,49657 | 200 | 60,96  | 5,8  |
| 2_84 | Abir_nov_2015 | 13/03/2016 | 22,84236 | 89,49911 | 210 | 64,008 | 8,1  |
| 2_85 | Abir_nov_2015 | 13/03/2016 | 22,84244 | 89,49919 | 200 | 60,96  | 8,02 |
| 2_86 | Abir_nov_2015 | 13/03/2016 | 22,84377 | 89,49941 | 200 | 60,96  | 8,91 |
| 2_87 | Abir_nov_2015 | 13/03/2016 | 22,83311 | 89,49438 | 250 | 76,2   | 5,14 |
| 2_88 | Abir_nov_2015 | 14/03/2016 | 22,67204 | 89,11194 | 200 | 60,96  | 1,11 |

|       |               |            |          |          |     |        |       |
|-------|---------------|------------|----------|----------|-----|--------|-------|
| 2_89  | Abir_nov_2015 | 14/03/2016 | 22,67081 | 89,12032 | 200 | 60,96  | 1,38  |
| 2_90  | Abir_nov_2015 | 14/03/2016 | 22,67122 | 89,13121 | 200 | 60,96  | 1,94  |
| 2_91  | Abir_nov_2015 | 14/03/2016 | 22,81086 | 89,03616 | 200 | 60,96  | 1,12  |
| 2_92  | Abir_nov_2015 | 14/03/2016 | 22,73779 | 89,06199 | 200 | 60,96  | 1,03  |
| 2_93  | Abir_nov_2015 | 15/03/2016 | 22,68688 | 89,07642 | 200 | 60,96  | 0,76  |
| 2_94  | Abir_nov_2015 | 15/03/2016 | 22,65993 | 89,08812 | 210 | 64,008 | 0,85  |
| 2_95  | Abir_nov_2015 | 15/03/2016 | 22,64678 | 89,10181 | 200 | 60,96  | 1,09  |
| 2_96  | Abir_nov_2015 | 15/03/2016 | 22,67211 | 89,10892 | 200 | 60,96  | 1,04  |
| 2_97  | Abir_nov_2015 | 15/03/2016 | 22,67068 | 89,13608 | 200 | 60,96  | 2,94  |
| 2_98  | Abir_nov_2015 | 15/03/2016 | 22,66371 | 89,1375  | 250 | 76,2   | 1,71  |
| 2_99  | Abir_nov_2015 | 15/03/2016 | 22,66099 | 89,13871 | 200 | 60,96  | 1,84  |
| 2_100 | Abir_nov_2015 | 15/03/2016 | 22,76584 | 89,06682 | 300 | 91,44  | 0,87  |
| 2_101 | Abir_nov_2015 | 15/03/2016 | 22,78498 | 89,06475 | 200 | 60,96  | 0,89  |
| 2_102 | Abir_nov_2015 | 11/04/2016 | 22,47721 | 89,84075 | 200 | 60,96  | 2,8   |
| 2_103 | Abir_nov_2015 | 11/04/2016 | 22,47851 | 89,83983 | 200 | 60,96  | 2,11  |
| 2_104 | Abir_nov_2015 | 18/04/2016 | 22,47546 | 89,02061 | 215 | 65,532 | 7,94  |
| 2_105 | Abir_nov_2015 | 19/04/2016 | 22,7994  | 89,05683 | 200 | 60,96  | 0,47  |
| 2_106 | Abir_nov_2015 | 23/04/2016 | 22,73914 | 89,06279 | 250 | 76,2   | 0,95  |
| 2_107 | Atik_P33      |            | 22,53682 | 89,48687 | 250 | 76,2   | 7,32  |
| 2_108 | Atik_P22      | 31/10/2014 | 22,5967  | 89,4214  | 240 | 73,152 | 7,13  |
| 2_109 | Atik_P22      | 31/10/2014 | 22,6062  | 89,4271  | 200 | 60,96  | 3,1   |
| 2_110 | Atik_Nov2016  | 16/11/2016 | 22,60589 | 89,42637 | 220 | 67,056 | 7,41  |
| 2_111 | Atik_Nov2016  | 23/11/2016 | 22,33228 | 89,10385 | 210 | 64,008 | 7,14  |
| 2_112 | Atik_Nov2016  | 24/11/2016 | 22,22405 | 89,12655 | 250 | 76,2   | 3,37  |
| 2_113 | Atik_Nov2016  | 25/11/2016 | 22,34292 | 89,10514 | 200 | 60,96  | 8,41  |
| 2_114 | Atik_Nov2016  | 25/11/2016 | 22,34524 | 89,10455 | 200 | 60,96  | 6,93  |
| 2_115 | Atik_Nov2016  | 25/11/2016 | 22,3491  | 89,10302 | 280 | 85,344 | 6,15  |
| 2_116 | Atik_Nov2016  | 25/11/2016 | 22,35308 | 89,10205 | 200 | 60,96  | 8,5   |
| 2_117 | Atik_Nov2016  | 25/11/2016 | 22,36682 | 89,09848 | 200 | 60,96  | 9,83  |
| 2_118 | Atik_Nov2016  | 25/11/2016 | 22,37181 | 89,10638 | 240 | 73,152 | 8,09  |
| 2_119 | Atik_Nov2016  | 25/11/2016 | 22,38158 | 89,1272  | 210 | 64,008 | 6,38  |
| 2_120 | Atik_Nov2016  | 25/11/2016 | 22,39346 | 89,12913 | 220 | 67,056 | 3,1   |
| 2_121 | Atik_Nov2016  | 26/11/2016 | 22,3753  | 89,09527 | 205 | 62,484 | 8,46  |
| 2_122 | Atik_Nov2016  | 26/11/2016 | 22,38129 | 89,09429 | 200 | 60,96  | 8,9   |
| 2_123 | Atik_Nov2016  | 26/11/2016 | 22,68786 | 89,08374 | 210 | 64,008 | 8,96  |
| 2_124 | Atik_Nov2016  | 27/06/2016 | 22,29822 | 89,10213 | 220 | 67,056 | 13,41 |
| 2_125 | Atik_Nov2016  | 27/06/2016 | 22,31082 | 89,10587 | 250 | 76,2   | 5,13  |
| 2_126 | Atik_Dec2016  | 12/12/2016 | 22,66527 | 89,44447 | 210 | 64,008 | 4,3   |
| 2_127 | Atik_Dec2016  | 13/12/2016 | 22,69861 | 89,43316 | 210 | 64,008 | 3,05  |
| 2_128 | Atik_Dec2016  | 14/12/2016 | 22,67033 | 89,46087 | 210 | 64,008 | 6,16  |
| 2_129 | Atik_Dec2016  | 14/12/2016 | 22,66895 | 89,45879 | 200 | 60,96  | 6,52  |
| 2_130 | Atik_Dec2016  | 14/12/2016 | 22,66683 | 89,45831 | 200 | 60,96  | 6,51  |
| 2_131 | Atik_Dec2016  | 14/12/2016 | 22,66737 | 89,45808 | 200 | 60,96  | 6,57  |
| 2_132 | Atik_Dec2016  | 14/12/2016 | 22,66484 | 89,45888 | 200 | 60,96  | 5,31  |
| 2_133 | Atik_Dec2016  | 14/12/2016 | 22,65989 | 89,4746  | 200 | 60,96  | 3,44  |
| 2_134 | Atik_Dec2016  | 15/12/2016 | 22,57336 | 89,33455 | 250 | 76,2   | 4,67  |
| 2_135 | Atik_Dec2016  | 16/12/2016 | 22,52966 | 89,09167 | 220 | 67,056 | 4,87  |

|       |                |            |          |          |          |        |       |
|-------|----------------|------------|----------|----------|----------|--------|-------|
| 2_136 | Atik_Dec2016   | 16/12/2016 | 22,47114 | 89,06803 | 250      | 76,2   | 9,72  |
| 2_137 | Atik_Dec2016   | 16/12/2016 | 22,47809 | 89,08143 | 250      | 76,2   | 9,5   |
| 2_138 | Atik_Dec2016   | 16/12/2016 | 22,47218 | 89,08215 | 280      | 85,344 | 8,9   |
| 2_139 | Atik_Dec2016   | 16/12/2016 | 22,28827 | 89,32606 | 235      | 71,628 | 7,9   |
| 2_140 | Atik_Dec2016   | 16/12/2016 | 22,27296 | 89,32359 | 250      | 76,2   | 2,95  |
| 2_141 | Atik_Dec2016   | 16/12/2016 | 22,27188 | 89,32495 | 250      | 76,2   | 2,5   |
| 2_142 | Atik_Dec2016   | 17/12/2016 | 22,45039 | 89,27273 | 200      | 60,96  | 7,93  |
| 2_143 | Atik_Dec2016   | 17/12/2016 | 22,41986 | 89,27921 | 280      | 85,344 | 7,18  |
| 2_144 | Atik_Dec2016   | 17/12/2016 | 22,30665 | 89,29729 | 250      | 76,2   | 2,67  |
| 2_145 | Atik_Dec2016   | 17/12/2016 | 22,30452 | 89,29813 | 245      | 74,676 | 1,79  |
| 2_146 | Atik_Dec2016   | 17/12/2016 | 22,30427 | 89,29716 | 250      | 76,2   | 1,45  |
| 2_147 | Atik_Dec2016   | 17/12/2016 | 22,30422 | 89,29742 | 250      | 76,2   | 1,37  |
| 2_148 | Atik_Dec2016   | 17/12/2016 | 22,30301 | 89,29786 | 260      | 79,248 | 1,56  |
| 2_149 | Atik_Dec2016   | 17/12/2016 | 22,30428 | 89,29928 | 240      | 73,152 | 2,11  |
| 2_150 | Atik_Dec2016   | 17/12/2016 | 22,30551 | 89,29932 | 270      | 82,296 | 2,2   |
| 2_151 | Atik_Dec2016   | 17/12/2016 | 22,31376 | 89,29472 | 230      | 70,104 | 3,61  |
| 2_152 | Atik_Dec2016   | 17/12/2016 | 22,50201 | 89,37883 | 230      | 70,104 | 6,41  |
| 2_153 | Atik_Dec2016   | 17/12/2016 | 22,54639 | 89,29609 | 230      | 70,104 | 3,46  |
| 2_154 | Atik_Dec2016   | 17/12/2016 | 22,53614 | 89,28944 | 200      | 60,96  | 3,9   |
| 2_155 | Atik_Dec2016   | 17/12/2016 | 22,52545 | 89,2889  | 205      | 62,484 | 3,1   |
| 2_156 | Atik_Dec2016   | 17/12/2016 | 22,51174 | 89,29134 | 300      | 91,44  | 5,6   |
| 2_157 | Atik_Dec2016   | 18/12/2016 | 22,71236 | 89,47668 | 230      | 70,104 | 3,07  |
| 2_158 | BWDB_WetSeason | 27.11.2012 | 22,64251 | 89,80753 | 321,5223 | 98     | 14,67 |
| 2_159 | BWDB_WetSeason | 27.11.2012 | 22,64183 | 89,81519 | 321,5223 | 98     | 13,74 |
| 2_160 | BWDB_WetSeason | 27.11.2012 | 22,63759 | 89,82016 | 321,5223 | 98     | 14,55 |
| 2_161 | BWDB_WetSeason | 27.11.2012 | 22,63409 | 89,82232 | 321,5223 | 98     | 15,46 |
| 2_162 | BWDB_WetSeason | 27.11.2012 | 22,62876 | 89,82458 | 321,5223 | 98     | 14,08 |
| 2_163 | BWDB_WetSeason | 28.11.2012 | 22,47203 | 89,60347 | 282,1522 | 86     | 14,16 |
| 2_164 | BWDB_WetSeason | 28.11.2012 | 22,46748 | 89,60719 | 285,4331 | 87     | 14,79 |
| 2_165 | BWDB_WetSeason | 28.11.2012 | 22,46704 | 89,6171  | 291,9948 | 89     | 10,42 |
| 2_166 | BWDB_WetSeason | 28.11.2012 | 22,46842 | 89,61763 | 282,1522 | 86     | 12,12 |
| 2_167 | BWDB_WetSeason | 28.11.2012 | 22,46795 | 89,61987 | 282,1522 | 86     | 14,61 |
| 2_168 | BWDB_WetSeason | 28.11.2012 | 22,92949 | 89,80759 | 282,1522 | 86     | 3,87  |
| 2_169 | BWDB_WetSeason | 29.11.2012 | 22,4585  | 89,86106 | 311,6798 | 95     | 20,6  |
| 2_170 | BWDB_WetSeason | 29.11.2012 | 22,48948 | 89,86292 | 301,8373 | 92     | 17,56 |
| 2_171 | BWDB_WetSeason | 07.11.2012 | 22,73646 | 89,51288 | 301,8373 | 92     | 6,24  |
| 2_172 | BWDB_WetSeason | 07.11.2012 | 22,73318 | 89,5027  | 282,1522 | 86     | 9,222 |
| 2_173 | BWDB_WetSeason | 07.11.2012 | 22,73125 | 89,49317 | 295,2756 | 90     | 5,81  |
| 2_174 | BWDB_WetSeason | 07.11.2012 | 22,73363 | 89,48237 | 301,8373 | 92     | 8,93  |
| 2_175 | BWDB_WetSeason | 11.11.2012 | 22,60556 | 89,52289 | 282,1522 | 86     | 9,14  |
| 2_176 | BWDB_WetSeason | 11.11.2012 | 22,60513 | 89,51306 | 282,1522 | 86     | 8,34  |
| 2_177 | BWDB_WetSeason | 11.11.2012 | 22,60567 | 89,50861 | 282,1522 | 86     | 6,04  |
| 2_178 | BWDB_WetSeason | 11.11.2012 | 22,60678 | 89,50188 | 291,9948 | 89     | 6,73  |
| 2_179 | BWDB_WetSeason | 11.11.2012 | 22,60814 | 89,49675 | 285,4331 | 87     | 4,66  |
| 2_180 | BWDB_WetSeason | 07.11.2012 | 22,87096 | 89,53853 | 282,1522 | 86     | 1,734 |
| 2_181 | BWDB_WetSeason | 07.11.2012 | 22,87389 | 89,53955 | 321,5223 | 98     | 4,11  |
| 2_182 | BWDB_WetSeason | 07.11.2012 | 22,87943 | 89,54064 | 321,5223 | 98     | 3,26  |

|       |                |            |          |          |          |    |       |
|-------|----------------|------------|----------|----------|----------|----|-------|
| 2_183 | BWDB_WetSeason | 07.11.2012 | 22,89077 | 89,54321 | 301,8373 | 92 | 0,824 |
| 2_184 | BWDB_WetSeason | 11.11.2012 | 22,82141 | 89,35673 | 301,8373 | 92 | 3,96  |
| 2_185 | BWDB_WetSeason | 11.11.2012 | 22,8248  | 89,36702 | 291,9948 | 89 | 0,85  |
| 2_186 | BWDB_WetSeason | 11.11.2012 | 22,81781 | 89,37834 | 301,8373 | 92 | 4,22  |
| 2_187 | BWDB_WetSeason | 11.11.2012 | 22,81619 | 89,38879 | 301,8373 | 92 | 3,13  |
| 2_188 | BWDB_WetSeason | 11.11.2012 | 22,81214 | 89,39769 | 301,8373 | 92 | 0,561 |
| 2_189 | BWDB_WetSeason | 06.11.2012 | 22,28985 | 89,29607 | 311,6798 | 95 | 1,781 |
| 2_190 | BWDB_WetSeason | 06.11.2012 | 22,30551 | 89,29775 | 314,9606 | 96 | 2,7   |
| 2_191 | BWDB_WetSeason | 06.11.2012 | 22,3112  | 89,29405 | 321,5223 | 98 | 5,4   |
| 2_192 | BWDB_WetSeason | 06.11.2012 | 22,31724 | 89,29201 | 301,8373 | 92 | 2,85  |
| 2_193 | BWDB_WetSeason | 06.11.2012 | 22,32324 | 89,2878  | 282,1522 | 86 | 2,23  |
| 2_194 | BWDB_WetSeason | 12.11.2012 | 22,61806 | 89,2918  | 291,9948 | 89 | 1,083 |
| 2_195 | BWDB_WetSeason | 12.11.2012 | 22,61878 | 89,30756 | 311,6798 | 95 | 0,552 |
| 2_196 | BWDB_WetSeason | 12.11.2012 | 22,61972 | 89,31322 | 301,8373 | 92 | 0,899 |
| 2_197 | BWDB_WetSeason | 12.11.2012 | 22,61901 | 89,31954 | 301,8373 | 92 | 3,9   |
| 2_198 | BWDB_WetSeason | 07.11.2012 | 22,79967 | 89,58882 | 301,8373 | 92 | 4,6   |
| 2_199 | BWDB_WetSeason | 07.11.2012 | 22,78657 | 89,61134 | 255,9055 | 78 | 1,83  |
| 2_200 | BWDB_WetSeason | 10.11.2012 | 22,54616 | 89,17214 | 282,1522 | 86 | 7,51  |
| 2_201 | BWDB_WetSeason | 10.11.2012 | 22,5392  | 89,16845 | 269,0289 | 82 | 8,67  |
| 2_202 | BWDB_WetSeason | 10.11.2012 | 22,53267 | 89,16261 | 275,5906 | 84 | 9,04  |
| 2_203 | BWDB_WetSeason | 10.11.2012 | 22,5246  | 89,15701 | 262,4672 | 80 | 7,44  |
| 2_204 | BWDB_WetSeason | 10.11.2012 | 22,51694 | 89,15332 | 262,4672 | 80 | 6,36  |
| 2_205 | BWDB_WetSeason | 10.11.2012 | 22,64252 | 88,98882 | 291,9948 | 89 | 1,336 |
| 2_206 | BWDB_WetSeason | 10.11.2012 | 22,63462 | 88,98817 | 249,3438 | 76 | 0,528 |
| 2_207 | BWDB_WetSeason | 10.11.2012 | 22,62573 | 88,99041 | 239,5013 | 73 | 2,61  |
| 2_208 | BWDB_WetSeason | 10.11.2012 | 22,61966 | 88,99414 | 275,5906 | 84 | 9,16  |
| 2_209 | BWDB_WetSeason | 10.11.2012 | 22,61342 | 88,9974  | 291,9948 | 89 | 8,72  |
| 2_210 | BWDB_WetSeason | 09.11.2012 | 22,44732 | 89,13627 | 269,0289 | 82 | 10,8  |
| 2_211 | BWDB_WetSeason | 09.11.2012 | 22,44784 | 89,12895 | 282,1522 | 86 | 9,78  |
| 2_212 | BWDB_WetSeason | 09.11.2012 | 22,44382 | 89,11903 | 301,8373 | 92 | 8,36  |
| 2_213 | BWDB_WetSeason | 09.11.2012 | 22,44395 | 89,10909 | 311,6798 | 95 | 0,62  |
| 2_214 | BWDB_WetSeason | 09.11.2012 | 22,44503 | 89,10049 | 291,9948 | 89 | 0,431 |
| 2_215 | BWDB_WetSeason | 09.11.2012 | 22,45702 | 89,03522 | 291,9948 | 89 | 11,02 |
| 2_216 | BWDB_WetSeason | 09.11.2012 | 22,44685 | 89,0405  | 285,4331 | 87 | 10,35 |
| 2_217 | BWDB_WetSeason | 09.11.2012 | 22,44027 | 89,04404 | 285,4331 | 87 | 9,48  |
| 2_218 | BWDB_WetSeason | 09.11.2012 | 22,43557 | 89,0489  | 282,1522 | 86 | 6,2   |
| 2_219 | BWDB_WetSeason | 09.11.2012 | 22,43328 | 89,05595 | 291,9948 | 89 | 7,39  |
| 2_220 | BWDB_WetSeason | 10.11.2012 | 22,75177 | 89,10426 | 301,8373 | 92 | 4,73  |
| 2_221 | BWDB_WetSeason | 10.11.2012 | 22,75696 | 89,11501 | 301,8373 | 92 | 1,124 |
| 2_222 | BWDB_WetSeason | 10.11.2012 | 22,75999 | 89,12217 | 301,8373 | 92 | 0,461 |
| 2_223 | BWDB_WetSeason | 10.11.2012 | 22,76602 | 89,13171 | 311,6798 | 95 | 0,664 |
| 2_224 | BWDB_WetSeason | 10.11.2012 | 22,76755 | 89,14172 | 311,6798 | 95 | 1,347 |
| 2_225 | BWDB_WetSeason | 09.11.2012 | 22,23728 | 89,08839 | 275,5906 | 84 | 20,05 |
| 2_226 | BWDB_WetSeason | 09.11.2012 | 22,24706 | 89,09082 | 262,4672 | 80 | 19,4  |
| 2_227 | BWDB_WetSeason | 09.11.2012 | 22,25496 | 89,09418 | 269,0289 | 82 | 2,92  |
| 2_228 | BWDB_WetSeason | 09.11.2012 | 22,2649  | 89,09772 | 291,9948 | 89 | 9,92  |
| 2_229 | BWDB_WetSeason | 09.11.2012 | 22,2725  | 89,10076 | 275,5906 | 84 | 13,09 |

|       |                   |            |          |          |          |        |        |
|-------|-------------------|------------|----------|----------|----------|--------|--------|
| 2_230 | BWDB_WetSeason    | 09.11.2012 | 22,45259 | 89,07846 | 282,1522 | 86     | 9,64   |
| 2_231 | BWDB_WetSeason    | 09.11.2012 | 22,34718 | 89,10496 | 262,4672 | 80     | 11,92  |
| 2_232 | BWDB_WetSeason    | 20.10.2012 | 22,27887 | 89,31125 | 219,8163 | 67     | 7,26   |
| 2_233 | Fieldwork_Jan2018 |            | 22,56996 | 89,12086 | 240      | 73,152 | 1,83   |
| 2_234 | Fieldwork_Jan2018 |            | 22,44827 | 89,15377 | 200      | 60,96  | 7,455  |
| 2_235 | Fieldwork_Jan2018 |            | 22,56894 | 89,11592 | 220      | 67,056 | 4,002  |
| 2_236 | Fieldwork_Jan2018 |            | 22,47189 | 89,0824  | 200      | 60,96  | 6,461  |
| 2_237 | Fieldwork_Jan2018 |            | 22,4689  | 89,0807  | 210      | 64,008 | 6,351  |
| 2_238 | Fieldwork_Jan2018 |            | 22,44665 | 89,07609 | 240      | 73,152 | 1,154  |
| 2_239 | Fieldwork_Jan2018 |            | 22,3346  | 89,13084 | 210      | 64,008 | 5,372  |
| 2_240 | Fieldwork_Jan2018 |            | 22,33493 | 89,13203 | 210      | 64,008 | 5,275  |
| 2_241 | Fieldwork_Jan2018 |            | 22,45002 | 89,15748 | 250      | 76,2   | 3,621  |
| 2_242 | Fieldwork_Jan2018 |            | 22,44938 | 89,15757 | 210      | 64,008 | 6,194  |
| 2_243 | Fieldwork_Jan2018 |            | 22,49352 | 89,31594 | 250      | 76,2   | 3,793  |
| 2_244 | Fieldwork_Jan2018 |            | 22,49043 | 89,32398 | 240      | 73,152 | 3,683  |
| 2_245 | Fieldwork_Jan2018 |            | 22,49693 | 89,33396 | 220      | 67,056 | 3,953  |
| 2_246 | Fieldwork_Jan2018 |            | 22,49461 | 89,34636 | 220      | 67,056 | 3,291  |
| 2_247 | Fieldwork_Jan2017 | 09/01/2017 | 22,67826 | 89,49642 | 205      | 62,484 | 5,45   |
| 2_248 | Fieldwork_Jan2017 | 24/01/2017 | 22,59448 | 89,16474 | 285      | 86,868 | 2,627  |
| 2_249 | Fieldwork_May2016 | 20/05/2016 | 22,54829 | 89,17082 | 280      | 85,12  | 2,978  |
| 2_250 | Fieldwork_May2016 | 24/05/2016 | 22,49765 | 89,17378 | 220      | 66,88  | 4,222  |
| 2_251 | Fieldwork_May2016 | 24/05/2016 | 22,49733 | 89,17368 | 240      | 72,96  | 4,644  |
| 2_252 | Fieldwork_May2016 | 24/05/2016 | 22,49692 | 89,17503 | 200      | 60,8   | 3,771  |
| 2_253 | Fieldwork_May2016 | 24/05/2016 | 22,49624 | 89,17515 | 210      | 63,84  | 3,465  |
| 2_254 | Fieldwork_May2016 | 31/05/2016 | 22,6054  | 89,51905 | 240      | 72,96  | 5,016  |
| 2_255 | Fieldwork_May2016 | 31/05/2016 | 22,60553 | 89,51347 | 230      | 69,92  | 4,85   |
| 2_256 | Fieldwork_May2016 | 31/05/2016 | 22,60555 | 89,5111  | 200      | 60,8   | 4,145  |
| 2_257 | Fieldwork_May2016 | 01/06/2016 | 22,58746 | 89,47176 | 200      | 60,8   | 6,302  |
| 2_258 | Vanderbilt_data   |            | 22,486   | 89,3504  | 240      | 73,152 | 8,802  |
| 2_259 | Vanderbilt_data   |            | 22,462   | 89,211   | 230      | 70,104 | 6,691  |
| 2_260 | Vanderbilt_data   |            | 22,8693  | 89,3072  | 240      | 73,152 | 2,365  |
| 2_261 | Vanderbilt_data   |            | 22,8672  | 89,3083  | 215      | 65,532 | 2,181  |
| 2_262 | Vanderbilt_data   |            | 22,5781  | 89,1242  | 220      | 67,056 | 2,174  |
| 2_263 | Vanderbilt_data   |            | 22,7171  | 89,1806  | 230      | 70,104 | 1,36   |
| 2_264 | Vanderbilt_data   |            | 22,7168  | 89,1935  | 235      | 71,628 | 1,736  |
| 2_265 | Vanderbilt_data   |            | 22,7108  | 89,199   | 235      | 71,628 | 1,892  |
| 2_266 | Vanderbilt_data   |            | 22,7219  | 89,1994  | 275      | 83,82  | 1,489  |
| 2_267 | Vanderbilt_data   |            | 22,736   | 89,175   | 215      | 65,532 | 1,136  |
| 2_268 | Vanderbilt_data   |            | 22,7271  | 89,185   | 260      | 79,248 | 1,591  |
| 2_269 | Vanderbilt_data   |            | 22,7332  | 89,1874  | 255      | 77,724 | 1,206  |
| 2_270 | Vanderbilt_data   |            | 22,7379  | 89,188   | 260      | 79,248 | 1,354  |
| 2_271 | Vanderbilt_data   |            | 23,0619  | 88,9944  | 305      | 92,964 | 0,518  |
| 2_272 | Vanderbilt_data   |            | 23,2053  | 89,5786  | 210      | 64,008 | 2,508  |
| 2_273 | Vanderbilt_data   |            | 23,1998  | 89,5661  | 200      | 60,96  | 2,839  |
| 2_274 | Vanderbilt_data   |            | 22,4519  | 89,1573  | 220      | 67,056 | 11,813 |
| 2_275 | Vanderbilt_data   |            | 22,4556  | 89,2992  | 260      | 79,248 | 7,8    |
| 2_276 | Vanderbilt_data   |            | 22,4562  | 89,2972  | 250      | 76,2   | 6,771  |

|       |                     |            |          |          |     |        |         |      |
|-------|---------------------|------------|----------|----------|-----|--------|---------|------|
| 2_277 | Vanderbilt_data     |            | 22,9952  | 89,5649  | 200 | 60,96  | 2,486   |      |
| 2_278 | Vanderbilt_data     |            | 22,9984  | 89,5673  | 220 | 67,056 | 2,398   |      |
| 2_279 | Vanderbilt_data     |            | 23,0075  | 89,5726  | 200 | 60,96  | 2,605   |      |
| 2_280 | Vanderbilt_data     |            | 23,0062  | 89,5739  | 200 | 60,96  | 2,736   |      |
| 2_281 | Vanderbilt_data     |            | 23,0178  | 89,5885  | 250 | 76,2   | 3,607   |      |
| 2_282 | Vanderbilt_data     |            | 23,0217  | 89,5924  | 220 | 67,056 | 4,195   |      |
| 2_283 | Vanderbilt_data     |            | 22,2678  | 89,2763  | 250 | 76,2   | 7,536   |      |
| 2_284 | Vanderbilt_data     |            | 22,2688  | 89,2775  | 270 | 82,296 | 9,392   |      |
| 2_285 | Vanderbilt_data     |            | 22,2641  | 89,2646  | 210 | 64,008 | 5,634   |      |
| 2_286 | Vanderbilt_data     |            | 22,6188  | 89,839   | 300 | 91,44  | 5,277   |      |
| 2_287 | Vanderbilt_data     |            | 22,5092  | 89,1997  | 245 | 74,676 | 2,176   |      |
| 2_288 | Vanderbilt_data     |            | 22,9715  | 89,4778  | 295 | 89,916 | 1,05    |      |
| 2_289 | JD_fieldwork_jan201 | 26/01/2018 | 22,55079 | 89,18036 | 240 | 73,152 | 4       |      |
| 2_290 | BGS_database        | 23/03/1998 | 22,896   | 89,508   |     | 61     | 2,2649  | 514  |
| 2_291 | BGS_database        | 25/03/1998 | 22,826   | 89,575   |     | 62     | 1,31494 | 82,2 |
| 2_292 | BGS_database        | 26/03/1998 | 22,862   | 89,525   |     | 65     | 1,7259  | 269  |
| 2_293 | BGS_database        | 25/03/1998 | 22,83    | 89,606   |     | 67     | 1,8689  | 334  |
| 2_294 | BGS_database        | 25/03/1998 | 22,812   | 89,645   |     | 69     | 1,6819  | 249  |
| 2_295 | BGS_database        | 26/03/1998 | 22,889   | 89,506   |     | 69     | 1,9217  | 358  |
| 2_296 | BGS_database        | 23/03/1998 | 22,887   | 89,6     |     | 71     | 1,6841  | 250  |
| 2_297 | BGS_database        | 26/03/1998 | 22,816   | 89,567   |     | 74     | 1,6731  | 245  |
| 2_298 | BGS_database        | 26/03/1998 | 22,837   | 89,531   |     | 74     | 1,6555  | 237  |
| 2_299 | BGS_database        | 25/03/1998 | 22,797   | 89,589   |     | 75     | 1,8161  | 310  |
| 2_300 | BGS_database        | 23/03/1998 | 22,969   | 89,477   |     | 77     | 1,19724 | 28,7 |
| 2_301 | BGS_database        | 26/03/1998 | 22,864   | 89,532   |     | 91     | 1,7985  | 302  |
| 2_302 | BGS_database        | 27/03/1998 | 22,751   | 88,941   |     | 92     | 1,33672 | 92,1 |
| 2_303 | BGS_database        | 26/03/1998 | 22,865   | 89,545   |     | 92     | 1,31032 | 80,1 |

#### Salinity 100 m+

| FID  | Data_sourc    | date       | Lat      | Long     | Depth_ft | Depth_m | EC | Na_mg/L |
|------|---------------|------------|----------|----------|----------|---------|----|---------|
| 3_1  | Abir_nov_2017 | 08.11.17   | 22,56149 | 89,0953  | 470      | 143,256 |    | 1,1     |
| 3_2  | Abir_nov_2017 | 08.11.17   | 22,56107 | 89,09632 | 490      | 149,352 |    | 2,06    |
| 3_3  | Abir_nov_2017 | 08.11.17   | 22,56104 | 89,0961  | 480      | 146,304 |    | 1,69    |
| 3_4  | Abir_nov_2017 | 08.11.17   | 22,69661 | 89,07438 | 460      | 140,208 |    | 0,87    |
| 3_5  | Abir_nov_2017 | 08.11.17   | 22,69505 | 89,07194 | 490      | 149,352 |    | 1,08    |
| 3_6  | Abir_nov_2017 | 08.11.17   | 22,69959 | 89,07438 | 960      | 292,608 |    | 2,43    |
| 3_7  | Abir_nov_2017 | 08.11.17   | 22,68602 | 89,05359 | 720      | 219,456 |    | 0,92    |
| 3_8  | Abir_nov_2017 | 08.11.17   | 22,68604 | 89,05372 | 680      | 207,264 |    | 1,11    |
| 3_9  | Abir_nov_2017 | 08.11.17   | 22,68219 | 89,05256 | 700      | 213,36  |    | 1,27    |
| 3_10 | Abir_nov_2017 | 08.11.17   | 22,68065 | 89,05278 | 770      | 234,696 |    | 1,39    |
| 3_11 | Abir_nov_2017 | 08.11.17   | 22,67651 | 89,05738 | 760      | 231,648 |    | 1,33    |
| 3_12 | Abir_nov_2017 | 08.11.17   | 22,67466 | 89,05706 | 680      | 207,264 |    | 1,34    |
| 3_13 | Abir_nov_2017 | 08.11.17   | 22,67138 | 89,06102 | 760      | 231,648 |    | 1,31    |
| 3_14 | Abir_nov_2017 | 09.11.17   | 22,69003 | 89,05618 | 770      | 234,696 |    | 0,65    |
| 3_15 | Abir_nov_2015 | 11/11/2015 | 22,76733 | 89,57042 | 950      | 289,56  |    | 0,96    |

|      |               |            |          |          |      |         |      |
|------|---------------|------------|----------|----------|------|---------|------|
| 3_16 | Abir_nov_2015 | 11/11/2015 | 22,76726 | 89,57037 | 650  | 198,12  | 1,01 |
| 3_17 | Abir_nov_2015 | 11/11/2015 | 22,77588 | 89,57419 | 650  | 198,12  | 1,05 |
| 3_18 | Abir_nov_2015 | 17/11/2015 | 22,76596 | 89,56831 | 930  | 283,464 | 0,87 |
| 3_19 | Abir_nov_2015 | 17/11/2015 | 22,76956 | 89,57521 | 950  | 289,56  | 0,88 |
| 3_20 | Abir_nov_2015 | 17/11/2015 | 22,77266 | 89,57393 | 950  | 289,56  | 0,8  |
| 3_21 | Abir_nov_2015 | 17/11/2015 | 22,77412 | 89,57667 | 1200 | 365,76  | 0,83 |
| 3_22 | Abir_nov_2015 | 17/11/2015 | 22,77721 | 89,57893 | 950  | 289,56  | 1,02 |
| 3_23 | Abir_nov_2015 | 17/11/2015 | 22,77799 | 89,57841 | 1200 | 365,76  | 0,8  |
| 3_24 | Abir_nov_2015 | 17/11/2015 | 22,77715 | 89,57134 | 920  | 280,416 | 0,92 |
| 3_25 | Abir_nov_2015 | 17/11/2015 | 22,77911 | 89,56779 | 950  | 289,56  | 0,8  |
| 3_26 | Abir_nov_2015 | 17/11/2015 | 22,77983 | 89,56765 | 950  | 289,56  | 0,89 |
| 3_27 | Abir_nov_2015 | 18/11/2015 | 22,95662 | 89,48002 | 930  | 283,464 | 0,68 |
| 3_28 | Abir_nov_2015 | 18/11/2015 | 22,96433 | 89,42806 | 955  | 291,084 | 0,58 |
| 3_29 | Abir_nov_2015 | 18/11/2015 | 22,93402 | 89,40247 | 1130 | 344,424 | 0,58 |
| 3_30 | Abir_nov_2015 | 18/11/2015 | 22,93309 | 89,40253 | 1200 | 365,76  | 0,7  |
| 3_31 | Abir_nov_2015 | 18/11/2015 | 22,92682 | 89,39877 | 1020 | 310,896 | 0,55 |
| 3_32 | Abir_nov_2015 | 18/11/2015 | 22,91117 | 89,39342 | 1100 | 335,28  | 1,23 |
| 3_33 | Abir_nov_2015 | 18/11/2015 | 22,8974  | 89,48886 | 400  | 121,92  | 3,12 |
| 3_34 | Abir_nov_2015 | 18/11/2015 | 22,89805 | 89,48898 | 500  | 152,4   | 3,24 |
| 3_35 | Abir_nov_2015 | 18/11/2015 | 22,89723 | 89,48904 | 450  | 137,16  | 3,16 |
| 3_36 | Abir_nov_2015 | 18/11/2015 | 22,91718 | 89,48388 | 600  | 182,88  | 2,27 |
| 3_37 | Abir_nov_2015 | 18/11/2015 | 22,91455 | 89,50524 | 1200 | 365,76  | 2,34 |
| 3_38 | Abir_nov_2015 | 18/11/2015 | 22,89255 | 89,51466 | 1100 | 335,28  | 0,91 |
| 3_39 | Abir_nov_2015 | 18/11/2015 | 22,88138 | 89,51952 | 1200 | 365,76  | 0,82 |
| 3_40 | Abir_nov_2015 | 18/11/2015 | 22,87639 | 89,5229  | 1200 | 365,76  | 0,94 |
| 3_41 | Abir_nov_2015 | 19/11/2015 | 22,84439 | 89,54413 | 1000 | 304,8   | 2,17 |
| 3_42 | Abir_nov_2015 | 19/11/2015 | 22,85792 | 89,54057 | 940  | 286,512 | 2,84 |
| 3_43 | Abir_nov_2015 | 19/11/2015 | 22,86133 | 89,54271 | 950  | 289,56  | 1,06 |
| 3_44 | Abir_nov_2015 | 19/11/2015 | 22,86073 | 89,5358  | 950  | 289,56  | 1,6  |
| 3_45 | Abir_nov_2015 | 19/11/2015 | 22,85804 | 89,53576 | 950  | 289,56  | 1,6  |
| 3_46 | Abir_nov_2015 | 19/11/2015 | 22,85739 | 89,53544 | 950  | 289,56  | 2,64 |
| 3_47 | Abir_nov_2015 | 19/11/2015 | 22,85718 | 89,53505 | 920  | 280,416 | 1,35 |
| 3_48 | Abir_nov_2015 | 19/11/2015 | 22,85626 | 89,53568 | 950  | 289,56  | 1,79 |
| 3_49 | Abir_nov_2015 | 19/11/2015 | 22,85246 | 89,53766 | 950  | 289,56  | 1,37 |
| 3_50 | Abir_nov_2015 | 19/11/2015 | 22,85121 | 89,53871 | 950  | 289,56  | 1,53 |
| 3_51 | Abir_nov_2015 | 19/11/2015 | 22,84824 | 89,55173 | 940  | 286,512 | 1,38 |
| 3_52 | Abir_nov_2015 | 19/11/2015 | 22,84463 | 89,5464  | 980  | 298,704 | 2,43 |
| 3_53 | Abir_nov_2015 | 19/11/2015 | 22,84168 | 89,54356 | 950  | 289,56  | 1,41 |
| 3_54 | Abir_nov_2015 | 19/11/2015 | 22,82855 | 89,54967 | 1100 | 335,28  | 1    |
| 3_55 | Abir_nov_2015 | 24/11/2015 | 22,77349 | 89,56936 | 950  | 289,56  | 0,97 |
| 3_56 | Abir_nov_2015 | 24/11/2015 | 22,77356 | 89,56964 | 650  | 198,12  | 1,08 |
| 3_57 | Abir_nov_2015 | 24/11/2015 | 22,77374 | 89,56962 | 650  | 198,12  | 1,06 |
| 3_58 | Abir_nov_2015 | 24/11/2015 | 22,77288 | 89,57027 | 860  | 262,128 | 0,97 |
| 3_59 | Abir_nov_2015 | 24/11/2015 | 22,77053 | 89,56897 | 950  | 289,56  | 0,95 |
| 3_60 | Abir_nov_2015 | 24/11/2015 | 22,77031 | 89,56915 | 650  | 198,12  | 1,03 |
| 3_61 | Abir_nov_2015 | 24/11/2015 | 22,77113 | 89,56762 | 650  | 198,12  | 1,1  |
| 3_62 | Abir_nov_2015 | 24/11/2015 | 22,77102 | 89,56731 | 650  | 198,12  | 1,1  |



|       |               |            |          |          |      |         |      |
|-------|---------------|------------|----------|----------|------|---------|------|
| 3_63  | Abir_nov_2015 | 24/11/2015 | 22,77191 | 89,56503 | 930  | 283,464 | 1,01 |
| 3_64  | Abir_nov_2015 | 24/11/2015 | 22,77191 | 89,56484 | 950  | 289,56  | 1,06 |
| 3_65  | Abir_nov_2015 | 24/11/2015 | 22,77609 | 89,57195 | 650  | 198,12  | 1,13 |
| 3_66  | Abir_nov_2015 | 24/11/2015 | 22,7768  | 89,57128 | 650  | 198,12  | 1    |
| 3_67  | Abir_nov_2015 | 24/11/2015 | 22,77701 | 89,57092 | 650  | 198,12  | 0,98 |
| 3_68  | Abir_nov_2015 | 24/11/2015 | 22,77696 | 89,57076 | 650  | 198,12  | 0,98 |
| 3_69  | Abir_nov_2015 | 24/11/2015 | 22,77707 | 89,5703  | 750  | 228,6   | 1    |
| 3_70  | Abir_nov_2015 | 24/11/2015 | 22,77708 | 89,57008 | 850  | 259,08  | 0,96 |
| 3_71  | Abir_nov_2015 | 24/11/2015 | 22,77684 | 89,56974 | 650  | 198,12  | 0,98 |
| 3_72  | Abir_nov_2015 | 24/11/2015 | 22,77711 | 89,56882 | 620  | 188,976 | 1,02 |
| 3_73  | Abir_nov_2015 | 24/11/2015 | 22,77693 | 89,56888 | 620  | 188,976 | 1,01 |
| 3_74  | Abir_nov_2015 | 24/11/2015 | 22,77714 | 89,56898 | 650  | 198,12  | 0,97 |
| 3_75  | Abir_nov_2015 | 24/11/2015 | 22,77686 | 89,56921 | 620  | 188,976 | 0,98 |
| 3_76  | Abir_nov_2015 | 24/11/2015 | 22,77633 | 89,57155 | 920  | 280,416 | 1,08 |
| 3_77  | Abir_nov_2015 | 24/11/2015 | 22,7738  | 89,57129 | 930  | 283,464 | 0,96 |
| 3_78  | Abir_nov_2015 | 24/11/2015 | 22,79038 | 89,57281 | 950  | 289,56  | 0,82 |
| 3_79  | Abir_nov_2015 | 24/11/2015 | 22,79921 | 89,55742 | 950  | 289,56  | 0,87 |
| 3_80  | Abir_nov_2015 | 24/11/2015 | 22,79471 | 89,55916 | 950  | 289,56  | 0,96 |
| 3_81  | Abir_nov_2015 | 24/11/2015 | 22,85638 | 89,53919 | 1000 | 304,8   | 2,48 |
| 3_82  | Abir_nov_2015 | 24/11/2015 | 22,85744 | 89,54094 | 1000 | 304,8   | 3,56 |
| 3_83  | Abir_nov_2015 | 25/11/2015 | 22,88656 | 89,51572 | 960  | 292,608 | 0,86 |
| 3_84  | Abir_nov_2015 | 25/11/2015 | 22,89213 | 89,51002 | 1290 | 393,192 | 3,65 |
| 3_85  | Abir_nov_2015 | 25/11/2015 | 22,89231 | 89,51037 | 1250 | 381     | 3,07 |
| 3_86  | Abir_nov_2015 | 25/11/2015 | 22,89231 | 89,51015 | 1250 | 381     | 3,43 |
| 3_87  | Abir_nov_2015 | 25/11/2015 | 22,89187 | 89,51012 | 1100 | 335,28  | 3,46 |
| 3_88  | Abir_nov_2015 | 25/11/2015 | 22,89148 | 89,50986 | 1130 | 344,424 | 3,56 |
| 3_89  | Abir_nov_2015 | 25/11/2015 | 22,89119 | 89,51013 | 1150 | 350,52  | 2,76 |
| 3_90  | Abir_nov_2015 | 25/11/2015 | 22,89214 | 89,50822 | 1250 | 381     | 3,66 |
| 3_91  | Abir_nov_2015 | 25/11/2015 | 22,89264 | 89,50836 | 1200 | 365,76  | 2,89 |
| 3_92  | Abir_nov_2015 | 25/11/2015 | 22,90053 | 89,50061 | 450  | 137,16  | 4,63 |
| 3_93  | Abir_nov_2015 | 25/11/2015 | 22,90095 | 89,50103 | 450  | 137,16  | 4,18 |
| 3_94  | Abir_nov_2015 | 25/11/2015 | 22,89727 | 89,49422 | 470  | 143,256 | 2,85 |
| 3_95  | Abir_nov_2015 | 25/11/2015 | 22,89653 | 89,49358 | 450  | 137,16  | 1,5  |
| 3_96  | Abir_nov_2015 | 25/11/2015 | 22,89515 | 89,49155 | 450  | 137,16  | 3,16 |
| 3_97  | Abir_nov_2015 | 25/11/2015 | 22,89459 | 89,49023 | 450  | 137,16  | 3,26 |
| 3_98  | Abir_nov_2015 | 25/11/2015 | 22,89421 | 89,48991 | 950  | 289,56  | 3,21 |
| 3_99  | Abir_nov_2015 | 25/11/2015 | 22,89218 | 89,48692 | 900  | 274,32  | 3,3  |
| 3_100 | Abir_nov_2015 | 25/11/2015 | 22,89195 | 89,48697 | 1300 | 396,24  | 0,85 |
| 3_101 | Abir_nov_2015 | 25/11/2015 | 22,88919 | 89,48781 | 900  | 274,32  | 3,19 |
| 3_102 | Abir_nov_2015 | 26/11/2015 | 23,00818 | 89,44755 | 920  | 280,416 | 1,9  |
| 3_103 | Abir_nov_2015 | 26/11/2015 | 23,00414 | 89,45483 | 950  | 289,56  | 1,14 |
| 3_104 | Abir_nov_2015 | 26/11/2015 | 23,00637 | 89,45638 | 950  | 289,56  | 1,92 |
| 3_105 | Abir_nov_2015 | 26/11/2015 | 23,00791 | 89,45838 | 900  | 274,32  | 1,9  |
| 3_106 | Abir_nov_2015 | 26/11/2015 | 22,98801 | 89,46911 | 920  | 280,416 | 1,65 |
| 3_107 | Abir_nov_2015 | 27/12/2015 | 22,80721 | 89,56566 | 1150 | 350,52  | 0,7  |
| 3_108 | Abir_nov_2015 | 27/12/2015 | 22,8068  | 89,56554 | 930  | 283,464 | 0,8  |
| 3_109 | Abir_nov_2015 | 27/12/2015 | 22,80686 | 89,5651  | 885  | 269,748 | 0,9  |

|       |               |            |          |          |      |         |      |
|-------|---------------|------------|----------|----------|------|---------|------|
| 3_110 | Abir_nov_2015 | 27/12/2015 | 22,80523 | 89,5659  | 930  | 283,464 | 0,7  |
| 3_111 | Abir_nov_2015 | 27/12/2015 | 22,80488 | 89,56631 | 950  | 289,56  | 2    |
| 3_112 | Abir_nov_2015 | 27/12/2015 | 22,80316 | 89,56669 | 1100 | 335,28  | 0,5  |
| 3_113 | Abir_nov_2015 | 27/12/2015 | 22,80229 | 89,56702 | 1200 | 365,76  | 0,7  |
| 3_114 | Abir_nov_2015 | 27/12/2015 | 22,79984 | 89,56666 | 930  | 283,464 | 0,6  |
| 3_115 | Abir_nov_2015 | 27/12/2015 | 22,79396 | 89,56681 | 650  | 198,12  | 0,6  |
| 3_116 | Abir_nov_2015 | 27/12/2015 | 22,79746 | 89,56611 | 1000 | 304,8   | 0,6  |
| 3_117 | Abir_nov_2015 | 27/12/2015 | 22,79687 | 89,56469 | 950  | 289,56  | 0,6  |
| 3_118 | Abir_nov_2015 | 27/12/2015 | 22,79791 | 89,56334 | 1000 | 304,8   | 0,5  |
| 3_119 | Abir_nov_2015 | 27/12/2015 | 22,80108 | 89,56298 | 1000 | 304,8   | 0,6  |
| 3_120 | Abir_nov_2015 | 27/12/2015 | 22,80455 | 89,56294 | 950  | 289,56  | 0,7  |
| 3_121 | Abir_nov_2015 | 27/12/2015 | 22,80565 | 89,55912 | 1250 | 381     | 0,9  |
| 3_122 | Abir_nov_2015 | 27/12/2015 | 22,80713 | 89,55369 | 1000 | 304,8   | 0,82 |
| 3_123 | Abir_nov_2015 | 27/12/2015 | 22,80854 | 89,55377 | 950  | 289,56  | 1,14 |
| 3_124 | Abir_nov_2015 | 27/12/2015 | 22,80722 | 89,55135 | 950  | 289,56  | 0,85 |
| 3_125 | Abir_nov_2015 | 27/12/2015 | 22,80743 | 89,55138 | 1200 | 365,76  | 1,01 |
| 3_126 | Abir_nov_2015 | 28/12/2015 | 22,91656 | 89,48402 | 950  | 289,56  | 0,68 |
| 3_127 | Abir_nov_2015 | 28/12/2015 | 22,91721 | 89,48382 | 450  | 137,16  | 2,65 |
| 3_128 | Abir_nov_2015 | 28/12/2015 | 22,91861 | 89,48626 | 700  | 213,36  | 2,68 |
| 3_129 | Abir_nov_2015 | 28/12/2015 | 22,91914 | 89,48635 | 850  | 259,08  | 2,19 |
| 3_130 | Abir_nov_2015 | 28/12/2015 | 22,89552 | 89,49054 | 650  | 198,12  | 3,32 |
| 3_131 | Abir_nov_2015 | 28/12/2015 | 22,89574 | 89,49107 | 650  | 198,12  | 3,41 |
| 3_132 | Abir_nov_2015 | 28/12/2015 | 22,89551 | 89,491   | 450  | 137,16  | 3,29 |
| 3_133 | Abir_nov_2015 | 28/12/2015 | 22,89477 | 89,49091 | 400  | 121,92  | 3,16 |
| 3_134 | Abir_nov_2015 | 28/12/2015 | 22,89508 | 89,49155 | 1000 | 304,8   | 3,14 |
| 3_135 | Abir_nov_2015 | 28/12/2015 | 22,89533 | 89,49162 | 650  | 198,12  | 8,6  |
| 3_136 | Abir_nov_2015 | 28/12/2015 | 22,89537 | 89,49194 | 400  | 121,92  | 3,06 |
| 3_137 | Abir_nov_2015 | 28/12/2015 | 22,89468 | 89,49368 | 460  | 140,208 | 3,07 |
| 3_138 | Abir_nov_2015 | 28/12/2015 | 22,89547 | 89,49422 | 460  | 140,208 | 3,26 |
| 3_139 | Abir_nov_2015 | 28/12/2015 | 22,89338 | 89,49412 | 450  | 137,16  | 3,14 |
| 3_140 | Abir_nov_2015 | 28/12/2015 | 22,8934  | 89,49287 | 420  | 128,016 | 2,8  |
| 3_141 | Abir_nov_2015 | 28/12/2015 | 22,89007 | 89,49686 | 400  | 121,92  | 4,18 |
| 3_142 | Abir_nov_2015 | 28/12/2015 | 22,88966 | 89,49709 | 800  | 243,84  | 0,72 |
| 3_143 | Abir_nov_2015 | 28/12/2015 | 22,88923 | 89,50018 | 460  | 140,208 | 3,61 |
| 3_144 | Abir_nov_2015 | 28/12/2015 | 22,88837 | 89,50441 | 1160 | 353,568 | 1,64 |
| 3_145 | Abir_nov_2015 | 28/12/2015 | 22,89052 | 89,5103  | 950  | 289,56  | 1,8  |
| 3_146 | Abir_nov_2015 | 29/12/2015 | 22,81452 | 89,53909 | 950  | 289,56  | 1,02 |
| 3_147 | Abir_nov_2015 | 29/12/2015 | 22,81495 | 89,53728 | 950  | 289,56  | 0,84 |
| 3_148 | Abir_nov_2015 | 29/12/2015 | 22,81349 | 89,535   | 840  | 256,032 | 1,2  |
| 3_149 | Abir_nov_2015 | 29/12/2015 | 22,81355 | 89,53472 | 970  | 295,656 | 1,18 |
| 3_150 | Abir_nov_2015 | 29/12/2015 | 22,81731 | 89,53455 | 970  | 295,656 | 1,2  |
| 3_151 | Abir_nov_2015 | 29/12/2015 | 22,82603 | 89,52947 | 1000 | 304,8   | 1,14 |
| 3_152 | Abir_nov_2015 | 29/12/2015 | 22,82511 | 89,52931 | 975  | 297,18  | 0,93 |
| 3_153 | Abir_nov_2015 | 29/12/2015 | 22,83261 | 89,51785 | 450  | 137,16  | 2,26 |
| 3_154 | Abir_nov_2015 | 29/12/2015 | 22,83247 | 89,51827 | 450  | 137,16  | 2,52 |
| 3_155 | Abir_nov_2015 | 29/12/2015 | 22,81099 | 89,53581 | 1200 | 365,76  | 0,8  |
| 3_156 | Abir_nov_2015 | 29/12/2015 | 22,81079 | 89,53406 | 950  | 289,56  | 1,08 |

|       |               |            |          |          |      |         |      |
|-------|---------------|------------|----------|----------|------|---------|------|
| 3_157 | Abir_nov_2015 | 29/12/2015 | 22,80875 | 89,53555 | 1080 | 329,184 | 0,82 |
| 3_158 | Abir_nov_2015 | 29/12/2015 | 22,80463 | 89,53786 | 1050 | 320,04  | 0,88 |
| 3_159 | Abir_nov_2015 | 29/12/2015 | 22,80014 | 89,53881 | 950  | 289,56  | 0,96 |
| 3_160 | Abir_nov_2015 | 29/12/2015 | 22,79262 | 89,53731 | 830  | 252,984 | 1,02 |
| 3_161 | Abir_nov_2015 | 29/12/2015 | 22,79236 | 89,53584 | 1100 | 335,28  | 0,95 |
| 3_162 | Abir_nov_2015 | 29/12/2015 | 22,78634 | 89,53722 | 950  | 289,56  | 1,22 |
| 3_163 | Abir_nov_2015 | 30/12/2015 | 22,82767 | 89,53671 | 1000 | 304,8   | 1,18 |
| 3_164 | Abir_nov_2015 | 30/12/2015 | 22,83582 | 89,53204 | 950  | 289,56  | 1,68 |
| 3_165 | Abir_nov_2015 | 30/12/2015 | 22,83716 | 89,54002 | 970  | 295,656 | 1,92 |
| 3_166 | Abir_nov_2015 | 30/12/2015 | 22,84734 | 89,53849 | 1200 | 365,76  | 1,48 |
| 3_167 | Abir_nov_2015 | 30/12/2015 | 22,85544 | 89,53283 | 950  | 289,56  | 2,44 |
| 3_168 | Abir_nov_2015 | 30/12/2015 | 22,8556  | 89,52914 | 1000 | 304,8   | 2,74 |
| 3_169 | Abir_nov_2015 | 30/12/2015 | 22,8554  | 89,52991 | 960  | 292,608 | 2,67 |
| 3_170 | Abir_nov_2015 | 30/12/2015 | 22,85548 | 89,5281  | 950  | 289,56  | 1,98 |
| 3_171 | Abir_nov_2015 | 30/12/2015 | 22,86023 | 89,53195 | 950  | 289,56  | 2,64 |
| 3_172 | Abir_nov_2015 | 30/12/2015 | 22,86499 | 89,52814 | 950  | 289,56  | 1    |
| 3_173 | Abir_nov_2015 | 30/12/2015 | 22,86494 | 89,52815 | 950  | 289,56  | 3,17 |
| 3_174 | Abir_nov_2015 | 30/12/2015 | 22,86595 | 89,52513 | 1200 | 365,76  | 3,75 |
| 3_175 | Abir_nov_2015 | 30/12/2015 | 22,86763 | 89,51941 | 1100 | 335,28  | 1,09 |
| 3_176 | Abir_nov_2015 | 06/01/2016 | 22,88937 | 89,49446 | 1320 | 402,336 | 1,29 |
| 3_177 | Abir_nov_2015 | 06/01/2016 | 22,88276 | 89,50143 | 950  | 289,56  | 2,75 |
| 3_178 | Abir_nov_2015 | 06/01/2016 | 22,87814 | 89,49979 | 980  | 298,704 | 0,71 |
| 3_179 | Abir_nov_2015 | 06/01/2016 | 22,87717 | 89,49886 | 950  | 289,56  | 0,69 |
| 3_180 | Abir_nov_2015 | 06/01/2016 | 22,87749 | 89,49891 | 975  | 297,18  | 0,7  |
| 3_181 | Abir_nov_2015 | 06/01/2016 | 22,87569 | 89,49659 | 985  | 300,228 | 0,72 |
| 3_182 | Abir_nov_2015 | 06/01/2016 | 22,87517 | 89,49496 | 1000 | 304,8   | 0,67 |
| 3_183 | Abir_nov_2015 | 06/01/2016 | 22,85663 | 89,50204 | 950  | 289,56  | 1,72 |
| 3_184 | Abir_nov_2015 | 06/01/2016 | 22,81136 | 89,5193  | 950  | 289,56  | 2,48 |
| 3_185 | Abir_nov_2015 | 06/01/2016 | 22,81112 | 89,51924 | 950  | 289,56  | 2,5  |
| 3_186 | Abir_nov_2015 | 06/01/2016 | 22,83092 | 89,51445 | 480  | 146,304 | 0,06 |
| 3_187 | Abir_nov_2015 | 06/01/2016 | 22,82619 | 89,50983 | 950  | 289,56  | 1,19 |
| 3_188 | Abir_nov_2015 | 06/01/2016 | 22,82491 | 89,50847 | 1000 | 304,8   | 1,26 |
| 3_189 | Abir_nov_2015 | 06/01/2016 | 22,83403 | 89,5176  | 1100 | 335,28  | 1,1  |
| 3_190 | Abir_nov_2015 | 06/01/2016 | 22,83397 | 89,51767 | 1100 | 335,28  | 1,13 |
| 3_191 | Abir_nov_2015 | 06/01/2016 | 22,83677 | 89,51937 | 950  | 289,56  | 1,14 |
| 3_192 | Abir_nov_2015 | 06/01/2016 | 22,83778 | 89,52025 | 950  | 289,56  | 1,15 |
| 3_193 | Abir_nov_2015 | 06/01/2016 | 22,83604 | 89,52654 | 950  | 289,56  | 1,2  |
| 3_194 | Abir_nov_2015 | 07/01/2016 | 22,78509 | 89,58893 | 1000 | 304,8   | 1    |
| 3_195 | Abir_nov_2015 | 07/01/2016 | 22,78603 | 89,58733 | 1000 | 304,8   | 1,03 |
| 3_196 | Abir_nov_2015 | 07/01/2016 | 22,7886  | 89,58701 | 680  | 207,264 | 0,91 |
| 3_197 | Abir_nov_2015 | 07/01/2016 | 22,78899 | 89,58849 | 950  | 289,56  | 1,19 |
| 3_198 | Abir_nov_2015 | 07/01/2016 | 22,79441 | 89,58822 | 450  | 137,16  | 2,6  |
| 3_199 | Abir_nov_2015 | 07/01/2016 | 22,79449 | 89,58822 | 950  | 289,56  | 1,81 |
| 3_200 | Abir_nov_2015 | 07/01/2016 | 22,7933  | 89,59032 | 880  | 268,224 | 1,44 |
| 3_201 | Abir_nov_2015 | 07/01/2016 | 22,80066 | 89,58664 | 950  | 289,56  | 2,3  |
| 3_202 | Abir_nov_2015 | 07/01/2016 | 22,79878 | 89,5874  | 950  | 289,56  | 2,33 |
| 3_203 | Abir_nov_2015 | 07/01/2016 | 22,79598 | 89,59017 | 1000 | 304,8   | 1,68 |

|       |               |            |          |          |      |         |      |
|-------|---------------|------------|----------|----------|------|---------|------|
| 3_204 | Abir_nov_2015 | 07/01/2016 | 22,78057 | 89,58958 | 1000 | 304,8   | 1    |
| 3_205 | Abir_nov_2015 | 07/01/2016 | 22,78003 | 89,59927 | 740  | 225,552 | 1,53 |
| 3_206 | Abir_nov_2015 | 07/01/2016 | 22,77896 | 89,60263 | 950  | 289,56  | 1,78 |
| 3_207 | Abir_nov_2015 | 07/01/2016 | 22,77641 | 89,60239 | 900  | 274,32  | 4,74 |
| 3_208 | Abir_nov_2015 | 07/01/2016 | 22,76964 | 89,60226 | 650  | 198,12  | 3,9  |
| 3_209 | Abir_nov_2015 | 07/01/2016 | 22,76842 | 89,60274 | 650  | 198,12  | 2,64 |
| 3_210 | Abir_nov_2015 | 07/01/2016 | 22,76459 | 89,60286 | 850  | 259,08  | 1,28 |
| 3_211 | Abir_nov_2015 | 07/01/2016 | 22,77714 | 89,58666 | 1000 | 304,8   | 1,95 |
| 3_212 | Abir_nov_2015 | 07/01/2016 | 22,76678 | 89,58428 | 950  | 289,56  | 2,82 |
| 3_213 | Abir_nov_2015 | 07/01/2016 | 22,76469 | 89,5987  | 880  | 268,224 | 4,56 |
| 3_214 | Abir_nov_2015 | 07/01/2016 | 22,76489 | 89,59622 | 650  | 198,12  | 2,97 |
| 3_215 | Abir_nov_2015 | 07/01/2016 | 22,76533 | 89,5965  | 950  | 289,56  | 4,72 |
| 3_216 | Abir_nov_2015 | 07/01/2016 | 22,86383 | 89,54972 | 1000 | 304,8   | 1,87 |
| 3_217 | Abir_nov_2015 | 07/01/2016 | 22,86019 | 89,56342 | 950  | 289,56  | 1,91 |
| 3_218 | Abir_nov_2015 | 07/01/2016 | 22,86086 | 89,55066 | 1100 | 335,28  | 1,26 |
| 3_219 | Abir_nov_2015 | 07/01/2016 | 22,85542 | 89,54945 | 950  | 289,56  | 1,93 |
| 3_220 | Abir_nov_2015 | 07/01/2016 | 22,86284 | 89,53818 | 950  | 289,56  | 1,37 |
| 3_221 | Abir_nov_2015 | 07/01/2016 | 22,81235 | 89,57451 | 1000 | 304,8   | 1,24 |
| 3_222 | Abir_nov_2015 | 07/01/2016 | 22,80539 | 89,57214 | 950  | 289,56  | 1,64 |
| 3_223 | Abir_nov_2015 | 04/02/2016 | 22,62823 | 89,51453 | 1100 | 335,28  | 6,27 |
| 3_224 | Abir_nov_2015 | 06/02/2016 | 22,89745 | 89,48891 | 460  | 140,208 | 3,68 |
| 3_225 | Abir_nov_2015 | 06/02/2016 | 22,89584 | 89,48566 | 420  | 128,016 | 3,38 |
| 3_226 | Abir_nov_2015 | 06/02/2016 | 22,89541 | 89,48335 | 450  | 137,16  | 3,17 |
| 3_227 | Abir_nov_2015 | 06/02/2016 | 22,89622 | 89,48345 | 1150 | 350,52  | 0,68 |
| 3_228 | Abir_nov_2015 | 06/02/2016 | 22,89464 | 89,50593 | 1100 | 335,28  | 3,15 |
| 3_229 | Abir_nov_2015 | 06/02/2016 | 22,89351 | 89,50544 | 1150 | 350,52  | 1,77 |
| 3_230 | Abir_nov_2015 | 06/02/2016 | 22,89075 | 89,50639 | 1000 | 304,8   | 2,01 |
| 3_231 | Abir_nov_2015 | 06/02/2016 | 22,8987  | 89,48766 | 450  | 137,16  | 3,92 |
| 3_232 | Abir_nov_2015 | 06/02/2016 | 22,8996  | 89,48835 | 450  | 137,16  | 3,68 |
| 3_233 | Abir_nov_2015 | 06/02/2016 | 22,80051 | 89,48711 | 430  | 131,064 | 3,45 |
| 3_234 | Abir_nov_2015 | 06/02/2016 | 22,90059 | 89,48534 | 450  | 137,16  | 2,93 |
| 3_235 | Abir_nov_2015 | 06/02/2016 | 22,89963 | 89,49484 | 460  | 140,208 | 3,47 |
| 3_236 | Abir_nov_2015 | 12/03/2016 | 22,83706 | 89,50076 | 450  | 137,16  | 3,13 |
| 3_237 | Abir_nov_2015 | 12/03/2016 | 22,83732 | 89,49959 | 450  | 137,16  | 3,14 |
| 3_238 | Abir_nov_2015 | 12/03/2016 | 22,83721 | 89,49812 | 460  | 140,208 | 3,16 |
| 3_239 | Abir_nov_2015 | 13/03/2016 | 22,84231 | 89,49901 | 480  | 146,304 | 3,4  |
| 3_240 | Abir_nov_2015 | 13/03/2016 | 22,84452 | 89,49942 | 370  | 112,776 | 2,89 |
| 3_241 | Abir_nov_2015 | 13/03/2016 | 22,84452 | 89,49942 | 400  | 121,92  | 2,78 |
| 3_242 | Abir_nov_2015 | 13/03/2016 | 22,83606 | 89,49446 | 460  | 140,208 | 2,44 |
| 3_243 | Abir_nov_2015 | 13/03/2016 | 22,83505 | 89,50847 | 450  | 137,16  | 2,57 |
| 3_244 | Abir_nov_2015 | 13/03/2016 | 22,83588 | 89,50668 | 450  | 137,16  | 3,02 |
| 3_245 | Abir_nov_2015 | 13/03/2016 | 22,83616 | 89,50581 | 480  | 146,304 | 3,18 |
| 3_246 | Abir_nov_2015 | 14/03/2016 | 22,67188 | 89,11196 | 560  | 170,688 | 1,06 |
| 3_247 | Abir_nov_2015 | 14/03/2016 | 22,67097 | 89,12004 | 750  | 228,6   | 1,35 |
| 3_248 | Abir_nov_2015 | 14/03/2016 | 22,67124 | 89,13125 | 450  | 137,16  | 4,2  |
| 3_249 | Abir_nov_2015 | 14/03/2016 | 22,81179 | 89,03531 | 450  | 137,16  | 0,85 |
| 3_250 | Abir_nov_2015 | 14/03/2016 | 22,79769 | 89,0589  | 850  | 259,08  | 2,2  |

|       |               |            |          |          |      |          |       |
|-------|---------------|------------|----------|----------|------|----------|-------|
| 3_251 | Abir_nov_2015 | 14/03/2016 | 22,79794 | 89,06357 | 500  | 152,4    | 4,77  |
| 3_252 | Abir_nov_2015 | 14/03/2016 | 22,74982 | 89,04657 | 750  | 228,6    | 0,82  |
| 3_253 | Abir_nov_2015 | 15/03/2016 | 22,69533 | 89,07491 | 650  | 198,12   | 1,01  |
| 3_254 | Abir_nov_2015 | 15/03/2016 | 22,67878 | 89,07784 | 800  | 243,84   | 1,02  |
| 3_255 | Abir_nov_2015 | 15/03/2016 | 22,66544 | 89,07742 | 560  | 170,688  | 0,96  |
| 3_256 | Abir_nov_2015 | 15/03/2016 | 22,66987 | 89,07909 | 450  | 137,16   | 1,68  |
| 3_257 | Abir_nov_2015 | 15/03/2016 | 22,64794 | 89,09604 | 650  | 198,12   | 1,11  |
| 3_258 | Abir_nov_2015 | 15/03/2016 | 22,64903 | 89,09779 | 800  | 243,84   | 0,87  |
| 3_259 | Abir_nov_2015 | 15/03/2016 | 22,6468  | 89,10193 | 950  | 289,56   | 0,94  |
| 3_260 | Abir_nov_2015 | 15/03/2016 | 22,64708 | 89,10863 | 595  | 181,356  | 1,73  |
| 3_261 | Abir_nov_2015 | 15/03/2016 | 22,66277 | 89,13792 | 550  | 167,64   | 6,02  |
| 3_262 | Abir_nov_2015 | 15/03/2016 | 22,66106 | 89,13895 | 750  | 228,6    | 3,22  |
| 3_263 | Abir_nov_2015 | 16/03/2016 | 22,75207 | 89,10836 | 750  | 228,6    | 2,85  |
| 3_264 | Abir_nov_2015 | 16/03/2016 | 22,75274 | 89,10558 | 770  | 234,696  | 10,07 |
| 3_265 | Abir_nov_2015 | 16/03/2016 | 22,75267 | 89,10545 | 750  | 228,6    | 1,68  |
| 3_266 | Abir_nov_2015 | 16/03/2016 | 22,73418 | 89,08517 | 750  | 228,6    | 0,97  |
| 3_267 | Abir_nov_2015 | 16/03/2016 | 22,73313 | 89,9485  | 750  | 228,6    | 2,86  |
| 3_268 | Abir_nov_2015 | 16/03/2016 | 22,71022 | 89,06753 | 750  | 228,6    | 1,15  |
| 3_269 | Abir_nov_2015 | 16/03/2016 | 22,71449 | 89,05913 | 750  | 228,6    | 1,34  |
| 3_270 | Abir_nov_2015 | 16/03/2016 | 22,71836 | 89,05567 | 750  | 228,6    | 0,99  |
| 3_271 | Abir_nov_2015 | 16/03/2016 | 22,69684 | 89,06624 | 680  | 207,264  | 0,8   |
| 3_272 | Abir_nov_2015 | 16/03/2016 | 22,69135 | 89,06691 | 700  | 213,36   | 2,1   |
| 3_273 | Abir_nov_2015 | 16/03/2016 | 22,68757 | 89,06667 | 1000 | 304,8    | 1,51  |
| 3_274 | Abir_nov_2015 | 16/03/2016 | 22,69427 | 89,07099 | 720  | 219,456  | 1,68  |
| 3_275 | Abir_nov_2015 | 16/03/2016 | 22,69662 | 89,07405 | 550  | 167,64   | 0,11  |
| 3_276 | Abir_nov_2015 | 16/03/2016 | 22,75501 | 89,11114 | 720  | 219,456  | 0,97  |
| 3_277 | Abir_nov_2015 | 23/03/2016 | 22,66762 | 89,79028 | 800  | 243,84   | 2,57  |
| 3_278 | Abir_nov_2015 | 23/03/2016 | 22,67222 | 89,78632 | 780  | 237,744  | 2,69  |
| 3_279 | Abir_nov_2015 | 23/03/2016 | 22,67281 | 89,78661 | 750  | 228,6    | 2,57  |
| 3_280 | Abir_nov_2015 | 23/03/2016 | 22,67584 | 89,78418 | 850  | 259,08   | 2,55  |
| 3_281 | Abir_nov_2015 | 23/03/2016 | 22,68909 | 89,80064 | 750  | 228,6    | 2,2   |
| 3_282 | Abir_nov_2015 | 23/03/2016 | 22,69846 | 89,79404 | 400  | 121,92   | 2,33  |
| 3_283 | Abir_nov_2015 | 23/03/2016 | 22,69892 | 89,78482 | 800  | 243,84   | 2,3   |
| 3_284 | Abir_nov_2015 | 23/03/2016 | 22,70229 | 89,79449 | 1000 | 304,8    | 2,2   |
| 3_285 | Abir_nov_2015 | 23/03/2016 | 22,70491 | 89,79913 | 1024 | 312,1152 | 2,95  |
| 3_286 | Abir_nov_2015 | 23/03/2016 | 22,70493 | 89,79972 | 1050 | 320,04   | 1,8   |
| 3_287 | Abir_nov_2015 | 23/03/2016 | 22,70455 | 89,79955 | 1000 | 304,8    | 1,83  |
| 3_288 | Abir_nov_2015 | 23/03/2016 | 22,70323 | 89,80299 | 1200 | 365,76   | 3,77  |
| 3_289 | Abir_nov_2015 | 24/03/2016 | 22,64665 | 89,79375 | 1600 | 487,68   | 4,04  |
| 3_290 | Abir_nov_2015 | 24/03/2016 | 22,6478  | 89,7987  | 840  | 256,032  | 3,68  |
| 3_291 | Abir_nov_2015 | 24/03/2016 | 22,64796 | 89,79897 | 1150 | 350,52   | 1,87  |
| 3_292 | Abir_nov_2015 | 24/03/2016 | 22,64786 | 89,79844 | 1150 | 350,52   | 1,83  |
| 3_293 | Abir_nov_2015 | 24/03/2016 | 22,64672 | 89,80025 | 550  | 167,64   | 3,55  |
| 3_294 | Abir_nov_2015 | 24/03/2016 | 22,65018 | 89,79784 | 820  | 249,936  | 3,45  |
| 3_295 | Abir_nov_2015 | 24/03/2016 | 22,65633 | 89,79824 | 850  | 259,08   | 3,02  |
| 3_296 | Abir_nov_2015 | 24/03/2016 | 22,64204 | 89,81075 | 950  | 289,56   | 3,82  |
| 3_297 | Abir_nov_2015 | 24/03/2016 | 22,64078 | 89,81018 | 750  | 228,6    | 3,77  |

|       |               |            |          |          |      |         |      |
|-------|---------------|------------|----------|----------|------|---------|------|
| 3_298 | Abir_nov_2015 | 24/03/2016 | 22,63963 | 89,80978 | 700  | 213,36  | 3,7  |
| 3_299 | Abir_nov_2015 | 24/03/2016 | 22,63739 | 89,81107 | 800  | 243,84  | 4,01 |
| 3_300 | Abir_nov_2015 | 24/03/2016 | 22,63489 | 89,81071 | 850  | 259,08  | 4,32 |
| 3_301 | Abir_nov_2015 | 24/03/2016 | 22,62681 | 89,81258 | 850  | 259,08  | 3,99 |
| 3_302 | Abir_nov_2015 | 24/03/2016 | 22,62903 | 89,81205 | 800  | 243,84  | 4    |
| 3_303 | Abir_nov_2015 | 24/03/2016 | 22,66277 | 89,76704 | 850  | 259,08  | 2,78 |
| 3_304 | Abir_nov_2015 | 24/03/2016 | 22,66035 | 89,76794 | 1000 | 304,8   | 1,25 |
| 3_305 | Abir_nov_2015 | 24/03/2016 | 22,64594 | 89,77207 | 810  | 246,888 | 1,75 |
| 3_306 | Abir_nov_2015 | 24/03/2016 | 22,63821 | 89,76309 | 800  | 243,84  | 1,55 |
| 3_307 | Abir_nov_2015 | 24/03/2016 | 22,63907 | 89,76453 | 850  | 259,08  | 1,73 |
| 3_308 | Abir_nov_2015 | 24/03/2016 | 22,64371 | 89,77109 | 600  | 182,88  | 1,55 |
| 3_309 | Abir_nov_2015 | 28/03/2016 | 22,64245 | 89,77063 | 800  | 243,84  | 3,13 |
| 3_310 | Abir_nov_2015 | 28/03/2016 | 22,63566 | 89,77738 | 880  | 268,224 | 3,5  |
| 3_311 | Abir_nov_2015 | 28/03/2016 | 22,64385 | 89,77368 | 800  | 243,84  | 3,16 |
| 3_312 | Abir_nov_2015 | 28/03/2016 | 22,64244 | 89,77419 | 850  | 259,08  | 3,22 |
| 3_313 | Abir_nov_2015 | 29/03/2016 | 22,66877 | 89,75383 | 760  | 231,648 | 2,11 |
| 3_314 | Abir_nov_2015 | 29/03/2016 | 22,67213 | 89,75111 | 850  | 259,08  | 2,22 |
| 3_315 | Abir_nov_2015 | 29/03/2016 | 22,67281 | 89,75133 | 860  | 262,128 | 1,85 |
| 3_316 | Abir_nov_2015 | 29/03/2016 | 22,67242 | 89,75114 | 980  | 298,704 | 2,14 |
| 3_317 | Abir_nov_2015 | 29/03/2016 | 22,67027 | 89,75495 | 850  | 259,08  | 2,2  |
| 3_318 | Abir_nov_2015 | 29/03/2016 | 22,66649 | 89,75348 | 960  | 292,608 | 2,13 |
| 3_319 | Abir_nov_2015 | 29/03/2016 | 22,66611 | 89,7538  | 960  | 292,608 | 2,02 |
| 3_320 | Abir_nov_2015 | 29/03/2016 | 22,6633  | 89,75245 | 850  | 259,08  | 2,67 |
| 3_321 | Abir_nov_2015 | 29/03/2016 | 22,64384 | 89,81234 | 850  | 259,08  | 3,95 |
| 3_322 | Abir_nov_2015 | 29/03/2016 | 22,64621 | 89,81438 | 860  | 262,128 | 3,81 |
| 3_323 | Abir_nov_2015 | 29/03/2016 | 22,64577 | 89,81661 | 750  | 228,6   | 4,05 |
| 3_324 | Abir_nov_2015 | 29/03/2016 | 22,64869 | 89,81525 | 850  | 259,08  | 4,03 |
| 3_325 | Abir_nov_2015 | 29/03/2016 | 22,65006 | 89,81164 | 850  | 259,08  | 3,77 |
| 3_326 | Abir_nov_2015 | 29/03/2016 | 22,64257 | 89,81387 | 800  | 243,84  | 3,87 |
| 3_327 | Abir_nov_2015 | 29/03/2016 | 22,64371 | 89,81171 | 800  | 243,84  | 3,41 |
| 3_328 | Abir_nov_2015 | 30/03/2016 | 22,67088 | 89,79112 | 800  | 243,84  | 3,3  |
| 3_329 | Abir_nov_2015 | 30/03/2016 | 22,67096 | 89,79157 | 800  | 243,84  | 3,18 |
| 3_330 | Abir_nov_2015 | 30/03/2016 | 22,67106 | 89,79231 | 850  | 259,08  | 3,27 |
| 3_331 | Abir_nov_2015 | 30/03/2016 | 22,67361 | 89,79225 | 800  | 243,84  | 3,14 |
| 3_332 | Abir_nov_2015 | 30/03/2016 | 22,67361 | 89,79369 | 800  | 243,84  | 3,03 |
| 3_333 | Abir_nov_2015 | 30/03/2016 | 22,67706 | 89,79378 | 800  | 243,84  | 3,04 |
| 3_334 | Abir_nov_2015 | 30/03/2016 | 22,67796 | 89,79628 | 800  | 243,84  | 3,03 |
| 3_335 | Abir_nov_2015 | 30/03/2016 | 22,68112 | 89,79922 | 850  | 259,08  | 2,9  |
| 3_336 | Abir_nov_2015 | 30/03/2016 | 22,68458 | 89,80295 | 850  | 259,08  | 2,72 |
| 3_337 | Abir_nov_2015 | 30/03/2016 | 22,68339 | 89,81145 | 850  | 259,08  | 2,93 |
| 3_338 | Abir_nov_2015 | 30/03/2016 | 22,68199 | 89,81411 | 785  | 239,268 | 3,19 |
| 3_339 | Abir_nov_2015 | 30/03/2016 | 22,68211 | 89,8139  | 785  | 239,268 | 3,16 |
| 3_340 | Abir_nov_2015 | 30/03/2016 | 22,68466 | 89,82134 | 850  | 259,08  | 3,19 |
| 3_341 | Abir_nov_2015 | 30/03/2016 | 22,68581 | 89,82215 | 800  | 243,84  | 3,15 |
| 3_342 | Abir_nov_2015 | 30/03/2016 | 22,68172 | 89,83988 | 1085 | 330,708 | 8,88 |
| 3_343 | Abir_nov_2015 | 30/03/2016 | 22,63329 | 89,82105 | 840  | 256,032 | 3,79 |
| 3_344 | Abir_nov_2015 | 30/03/2016 | 22,63252 | 89,8197  | 850  | 259,08  | 3,75 |

|       |               |            |          |          |      |          |      |
|-------|---------------|------------|----------|----------|------|----------|------|
| 3_345 | Abir_nov_2015 | 30/03/2016 | 22,64141 | 89,81279 | 800  | 243,84   | 1,79 |
| 3_346 | Abir_nov_2015 | 06/04/2016 | 22,62871 | 89,82246 | 800  | 243,84   | 4,1  |
| 3_347 | Abir_nov_2015 | 06/04/2016 | 22,62738 | 89,82266 | 800  | 243,84   | 5,11 |
| 3_348 | Abir_nov_2015 | 06/04/2016 | 22,62303 | 89,82741 | 800  | 243,84   | 3,69 |
| 3_349 | Abir_nov_2015 | 06/04/2016 | 22,61863 | 89,82565 | 860  | 262,128  | 3,79 |
| 3_350 | Abir_nov_2015 | 06/04/2016 | 22,61517 | 89,82412 | 650  | 198,12   | 3,77 |
| 3_351 | Abir_nov_2015 | 06/04/2016 | 22,61429 | 89,82484 | 600  | 182,88   | 3,54 |
| 3_352 | Abir_nov_2015 | 06/04/2016 | 22,60899 | 89,83658 | 400  | 121,92   | 3,41 |
| 3_353 | Abir_nov_2015 | 06/04/2016 | 22,63336 | 89,80005 | 800  | 243,84   | 3,52 |
| 3_354 | Abir_nov_2015 | 06/04/2016 | 22,63438 | 89,80128 | 800  | 243,84   | 4,24 |
| 3_355 | Abir_nov_2015 | 10/04/2016 | 22,46635 | 89,86781 | 800  | 243,84   | 2,28 |
| 3_356 | Abir_nov_2015 | 10/04/2016 | 22,46175 | 89,90927 | 700  | 213,36   | 7,21 |
| 3_357 | Abir_nov_2015 | 17/04/2016 | 22,69396 | 89,05621 | 750  | 228,6    | 1,3  |
| 3_358 | Abir_nov_2015 | 17/04/2016 | 22,69409 | 89,05673 | 1100 | 335,28   | 2,1  |
| 3_359 | Abir_nov_2015 | 17/04/2016 | 22,6921  | 89,05633 | 1120 | 341,376  | 2,1  |
| 3_360 | Abir_nov_2015 | 17/04/2016 | 22,68635 | 89,05493 | 750  | 228,6    | 1,38 |
| 3_361 | Abir_nov_2015 | 17/04/2016 | 22,68435 | 89,05383 | 800  | 243,84   | 2,52 |
| 3_362 | Abir_nov_2015 | 17/04/2016 | 22,67628 | 89,05529 | 590  | 179,832  | 1,4  |
| 3_363 | Abir_nov_2015 | 18/04/2016 | 22,39856 | 89,08034 | 750  | 228,6    | 0,97 |
| 3_364 | Abir_nov_2015 | 19/04/2016 | 22,79154 | 89,08215 | 762  | 232,2576 | 9,01 |
| 3_365 | Abir_nov_2015 | 19/04/2016 | 22,7875  | 89,08478 | 650  | 198,12   | 7,7  |
| 3_366 | Abir_nov_2015 | 19/04/2016 | 22,79485 | 89,07231 | 660  | 201,168  | 8,42 |
| 3_367 | Abir_nov_2015 | 19/04/2016 | 22,80073 | 89,06311 | 600  | 182,88   | 4,33 |
| 3_368 | Abir_nov_2015 | 19/04/2016 | 22,80054 | 89,05817 | 650  | 198,12   | 2,43 |
| 3_369 | Abir_nov_2015 | 19/04/2016 | 22,79763 | 89,05891 | 580  | 176,784  | 1,22 |
| 3_370 | Abir_nov_2015 | 19/04/2016 | 22,79777 | 89,06361 | 720  | 219,456  | 2,28 |
| 3_371 | Abir_nov_2015 | 20/04/2016 | 22,77636 | 89,08806 | 750  | 228,6    | 2,67 |
| 3_372 | Abir_nov_2015 | 20/04/2016 | 22,77241 | 89,08791 | 650  | 198,12   | 2,85 |
| 3_373 | Abir_nov_2015 | 20/04/2016 | 22,77118 | 89,08592 | 645  | 196,596  | 3,03 |
| 3_374 | Abir_nov_2015 | 20/04/2016 | 22,77102 | 89,08348 | 580  | 176,784  | 2,01 |
| 3_375 | Abir_nov_2015 | 20/04/2016 | 22,76176 | 89,08714 | 530  | 161,544  | 1,79 |
| 3_376 | Abir_nov_2015 | 20/04/2016 | 22,75808 | 89,08733 | 600  | 182,88   | 1,96 |
| 3_377 | Abir_nov_2015 | 20/04/2016 | 22,75703 | 89,08868 | 720  | 219,456  | 1,52 |
| 3_378 | Abir_nov_2015 | 20/04/2016 | 22,75361 | 89,06855 | 780  | 237,744  | 3,5  |
| 3_379 | Abir_nov_2015 | 20/04/2016 | 22,73913 | 89,0876  | 600  | 182,88   | 1,9  |
| 3_380 | Abir_nov_2015 | 21/04/2016 | 22,70156 | 89,06448 | 800  | 243,84   | 2,83 |
| 3_381 | Abir_nov_2015 | 21/04/2016 | 22,70153 | 89,06374 | 1200 | 365,76   | 2,11 |
| 3_382 | Abir_nov_2015 | 21/04/2016 | 22,70149 | 89,06226 | 762  | 232,2576 | 1,48 |
| 3_383 | Abir_nov_2015 | 21/04/2016 | 22,70291 | 89,05603 | 762  | 232,2576 | 1,18 |
| 3_384 | Abir_nov_2015 | 21/04/2016 | 22,70384 | 89,05358 | 762  | 232,2576 | 2,31 |
| 3_385 | Abir_nov_2015 | 21/04/2016 | 22,70601 | 89,04664 | 762  | 232,2576 | 1,62 |
| 3_386 | Abir_nov_2015 | 21/04/2016 | 22,70796 | 89,04011 | 762  | 232,2576 | 1,05 |
| 3_387 | Abir_nov_2015 | 21/04/2016 | 22,70721 | 89,03545 | 762  | 232,2576 | 0,77 |
| 3_388 | Abir_nov_2015 | 21/04/2016 | 22,70631 | 89,033   | 762  | 232,2576 | 0,76 |
| 3_389 | Abir_nov_2015 | 21/04/2016 | 22,70303 | 89,03157 | 762  | 232,2576 | 2,13 |
| 3_390 | Abir_nov_2015 | 21/04/2016 | 22,70118 | 89,03066 | 762  | 232,2576 | 1,09 |
| 3_391 | Abir_nov_2015 | 21/04/2016 | 22,69921 | 89,02982 | 762  | 232,2576 | 2,05 |

|       |               |            |          |          |      |          |       |
|-------|---------------|------------|----------|----------|------|----------|-------|
| 3_392 | Abir_nov_2015 | 21/04/2016 | 22,69927 | 89,02939 | 750  | 228,6    | 2,01  |
| 3_393 | Abir_nov_2015 | 21/04/2016 | 22,69703 | 89,02874 | 762  | 232,2576 | 2,14  |
| 3_394 | Abir_nov_2015 | 21/04/2016 | 22,69319 | 89,02529 | 900  | 274,32   | 1,79  |
| 3_395 | Abir_nov_2015 | 21/04/2016 | 22,69331 | 89,02466 | 762  | 232,2576 | 1,7   |
| 3_396 | Abir_nov_2015 | 21/04/2016 | 22,69408 | 89,02234 | 840  | 256,032  | 0,77  |
| 3_397 | Abir_nov_2015 | 21/04/2016 | 22,69409 | 89,022   | 762  | 232,2576 | 0,84  |
| 3_398 | Abir_nov_2015 | 21/04/2016 | 22,69621 | 89,019   | 650  | 198,12   | 3,41  |
| 3_399 | Abir_nov_2015 | 21/04/2016 | 22,70293 | 89,01975 | 762  | 232,2576 | 2,58  |
| 3_400 | Abir_nov_2015 | 21/04/2016 | 22,70765 | 89,02399 | 762  | 232,2576 | 3,55  |
| 3_401 | Abir_nov_2015 | 21/04/2016 | 22,70726 | 89,02429 | 762  | 232,2576 | 3,26  |
| 3_402 | Abir_nov_2015 | 21/04/2016 | 22,71005 | 89,02493 | 762  | 232,2576 | 1,24  |
| 3_403 | Abir_nov_2015 | 21/04/2016 | 22,70746 | 89,03262 | 650  | 198,12   | 2,75  |
| 3_404 | Abir_nov_2015 | 21/04/2016 | 22,70752 | 89,03543 | 762  | 232,2576 | 0,81  |
| 3_405 | Abir_nov_2015 | 23/04/2016 | 22,73328 | 89,05946 | 762  | 232,2576 | 3,5   |
| 3_406 | Abir_nov_2015 | 23/04/2016 | 22,73444 | 89,0574  | 760  | 231,648  | 0,84  |
| 3_407 | Abir_nov_2015 | 23/04/2016 | 22,73656 | 89,05637 | 800  | 243,84   | 0,78  |
| 3_408 | Abir_nov_2015 | 23/04/2016 | 22,73641 | 89,05621 | 762  | 232,2576 | 0,78  |
| 3_409 | Abir_nov_2015 | 23/04/2016 | 22,73778 | 89,05705 | 750  | 228,6    | 0,83  |
| 3_410 | Abir_nov_2015 | 23/04/2016 | 22,74185 | 89,05596 | 762  | 232,2576 | 1,12  |
| 3_411 | Abir_nov_2015 | 23/04/2016 | 22,74541 | 89,05657 | 1580 | 481,584  | 0,78  |
| 3_412 | Abir_nov_2015 | 23/04/2016 | 22,74696 | 89,051   | 762  | 232,2576 | 3,26  |
| 3_413 | Abir_nov_2015 | 23/04/2016 | 22,80549 | 89,05041 | 510  | 155,448  | 1,08  |
| 3_414 | Abir_nov_2015 | 23/04/2016 | 22,80004 | 89,02808 | 495  | 150,876  | 0,61  |
| 3_415 | Abir_nov_2015 | 24/04/2016 | 22,63784 | 89,12617 | 650  | 198,12   | 7,83  |
| 3_416 | Abir_nov_2015 | 24/04/2016 | 22,64001 | 89,12203 | 750  | 228,6    | 2,23  |
| 3_417 | Abir_nov_2015 | 24/04/2016 | 22,69195 | 89,09324 | 762  | 232,2576 | 1,16  |
| 3_418 | Atik_P33      |            | 22,54578 | 89,48177 | 780  | 237,744  | 18,2  |
| 3_419 | Atik_P33      |            | 22,53328 | 89,48463 | 394  | 120,0912 | 17,24 |
| 3_420 | Atik_P33      |            | 22,53404 | 89,53676 | 850  | 259,08   | 7,59  |
| 3_421 | Atik_P33      |            | 22,5626  | 89,53075 | 650  | 198,12   | 3,8   |
| 3_422 | Atik_Nov2016  | 16/11/2016 | 22,66644 | 89,47166 | 540  | 164,592  | 4,46  |
| 3_423 | Atik_Nov2016  | 16/11/2016 | 22,66521 | 89,4726  | 553  | 168,5544 | 3,12  |
| 3_424 | Atik_Nov2016  | 16/11/2016 | 22,663   | 89,47936 | 540  | 164,592  | 1,98  |
| 3_425 | Atik_Nov2016  | 16/11/2016 | 22,66728 | 89,4797  | 625  | 190,5    | 1,81  |
| 3_426 | Atik_Nov2016  | 16/11/2016 | 22,67198 | 89,48588 | 420  | 128,016  | 0,93  |
| 3_427 | Atik_Nov2016  | 16/11/2016 | 22,6732  | 89,48842 | 480  | 146,304  | 1,05  |
| 3_428 | Atik_Nov2016  | 16/11/2016 | 22,67431 | 89,49071 | 420  | 128,016  | 1,2   |
| 3_429 | Atik_Nov2016  | 18/11/2016 | 22,6774  | 89,6515  | 1000 | 304,8    | 3,32  |
| 3_430 | Atik_Nov2016  | 18/11/2016 | 22,67705 | 89,65114 | 900  | 274,32   | 3,24  |
| 3_431 | Atik_Nov2016  | 18/11/2016 | 22,67715 | 89,65113 | 900  | 274,32   | 3,38  |
| 3_432 | Atik_Nov2016  | 18/11/2016 | 22,67628 | 89,64989 | 940  | 286,512  | 3,39  |
| 3_433 | Atik_Nov2016  | 18/11/2016 | 22,67657 | 89,64863 | 870  | 265,176  | 2,96  |
| 3_434 | Atik_Nov2016  | 18/11/2016 | 22,67664 | 89,64825 | 900  | 274,32   | 2,97  |
| 3_435 | Atik_Nov2016  | 18/11/2016 | 22,66722 | 89,64735 | 950  | 289,56   | 2,59  |
| 3_436 | Atik_Nov2016  | 18/11/2016 | 22,63745 | 89,64141 | 950  | 289,56   | 2,11  |
| 3_437 | Atik_Nov2016  | 18/11/2016 | 22,61296 | 89,64313 | 970  | 295,656  | 2,24  |
| 3_438 | Atik_Nov2016  | 18/11/2016 | 22,61121 | 89,64196 | 1000 | 304,8    | 2,22  |



|       |              |            |          |          |      |         |      |
|-------|--------------|------------|----------|----------|------|---------|------|
| 3_439 | Atik_Nov2016 | 18/11/2016 | 22,61149 | 89,64183 | 950  | 289,56  | 2,24 |
| 3_440 | Atik_Nov2016 | 18/11/2016 | 22,61203 | 89,63729 | 800  | 243,84  | 2,35 |
| 3_441 | Atik_Nov2016 | 18/11/2016 | 22,61305 | 89,6338  | 900  | 274,32  | 1,97 |
| 3_442 | Atik_Nov2016 | 18/11/2016 | 22,61252 | 89,62662 | 900  | 274,32  | 2,01 |
| 3_443 | Atik_Nov2016 | 18/11/2016 | 22,61333 | 89,62077 | 900  | 274,32  | 2,09 |
| 3_444 | Atik_Nov2016 | 18/11/2016 | 22,61469 | 89,6143  | 850  | 259,08  | 2,08 |
| 3_445 | Atik_Nov2016 | 19/11/2016 | 22,57412 | 89,61322 | 1000 | 304,8   | 2,97 |
| 3_446 | Atik_Nov2016 | 19/11/2016 | 22,57415 | 89,61238 | 800  | 243,84  | 3,05 |
| 3_447 | Atik_Nov2016 | 19/11/2016 | 22,57438 | 89,60917 | 630  | 192,024 | 2,82 |
| 3_448 | Atik_Nov2016 | 19/11/2016 | 22,57385 | 89,60707 | 740  | 225,552 | 3,04 |
| 3_449 | Atik_Nov2016 | 19/11/2016 | 22,5731  | 89,60799 | 700  | 213,36  | 2,7  |
| 3_450 | Atik_Nov2016 | 19/11/2016 | 22,57319 | 89,60809 | 700  | 213,36  | 2,78 |
| 3_451 | Atik_Nov2016 | 19/11/2016 | 22,57344 | 89,60458 | 645  | 196,596 | 3,35 |
| 3_452 | Atik_Nov2016 | 19/11/2016 | 22,57351 | 89,6042  | 660  | 201,168 | 3,56 |
| 3_453 | Atik_Nov2016 | 19/11/2016 | 22,57123 | 89,60402 | 650  | 198,12  | 2,17 |
| 3_454 | Atik_Nov2016 | 19/11/2016 | 22,57112 | 89,60436 | 650  | 198,12  | 2,21 |
| 3_455 | Atik_Nov2016 | 19/11/2016 | 22,57115 | 89,60448 | 750  | 228,6   | 2,21 |
| 3_456 | Atik_Nov2016 | 19/11/2016 | 22,57107 | 89,60468 | 650  | 198,12  | 2,22 |
| 3_457 | Atik_Nov2016 | 19/11/2016 | 22,57107 | 89,60475 | 650  | 198,12  | 2,19 |
| 3_458 | Atik_Nov2016 | 19/11/2016 | 22,57157 | 89,59693 | 520  | 158,496 | 3,7  |
| 3_459 | Atik_Nov2016 | 19/11/2016 | 22,57173 | 89,59631 | 630  | 192,024 | 4,86 |
| 3_460 | Atik_Nov2016 | 19/11/2016 | 22,57215 | 89,59502 | 620  | 188,976 | 2,54 |
| 3_461 | Atik_Nov2016 | 19/11/2016 | 22,54354 | 89,60526 | 900  | 274,32  | 2,41 |
| 3_462 | Atik_Nov2016 | 19/11/2016 | 22,54293 | 89,60439 | 1050 | 320,04  | 2,41 |
| 3_463 | Atik_Nov2016 | 19/11/2016 | 22,54249 | 89,6031  | 920  | 280,416 | 2,33 |
| 3_464 | Atik_Nov2016 | 19/11/2016 | 22,54004 | 89,60176 | 1160 | 353,568 | 2,25 |
| 3_465 | Atik_Nov2016 | 19/11/2016 | 22,53806 | 89,60106 | 1060 | 323,088 | 2,07 |
| 3_466 | Atik_Nov2016 | 21/11/2016 | 22,74731 | 89,50847 | 460  | 140,208 | 1,26 |
| 3_467 | Atik_Nov2016 | 21/11/2016 | 22,75455 | 89,50449 | 450  | 137,16  | 1,24 |
| 3_468 | Atik_Nov2016 | 21/11/2016 | 22,75416 | 89,50351 | 480  | 146,304 | 0,93 |
| 3_469 | Atik_Nov2016 | 21/11/2016 | 22,75435 | 89,50327 | 450  | 137,16  | 1,14 |
| 3_470 | Atik_Nov2016 | 21/11/2016 | 22,75482 | 89,50299 | 460  | 140,208 | 0,88 |
| 3_471 | Atik_Nov2016 | 21/11/2016 | 22,75677 | 89,50069 | 450  | 137,16  | 1,62 |
| 3_472 | Atik_Nov2016 | 21/11/2016 | 22,75867 | 89,49941 | 450  | 137,16  | 0,73 |
| 3_473 | Atik_Nov2016 | 21/11/2016 | 22,75547 | 89,50106 | 460  | 140,208 | 0,8  |
| 3_474 | Atik_Nov2016 | 21/11/2016 | 22,74678 | 89,50813 | 460  | 140,208 | 1,2  |
| 3_475 | Atik_Nov2016 | 21/11/2016 | 22,74641 | 89,5062  | 450  | 137,16  | 1,03 |
| 3_476 | Atik_Nov2016 | 21/11/2016 | 22,74591 | 89,50639 | 460  | 140,208 | 1,09 |
| 3_477 | Atik_Nov2016 | 21/11/2016 | 22,74615 | 89,50598 | 460  | 140,208 | 0,97 |
| 3_478 | Atik_Nov2016 | 21/11/2016 | 22,74637 | 89,50523 | 460  | 140,208 | 0,92 |
| 3_479 | Atik_Nov2016 | 21/11/2016 | 22,74673 | 89,50385 | 450  | 137,16  | 0,87 |
| 3_480 | Atik_Nov2016 | 21/11/2016 | 22,74686 | 89,50276 | 450  | 137,16  | 0,84 |
| 3_481 | Atik_Nov2016 | 21/11/2016 | 22,74714 | 89,50114 | 450  | 137,16  | 0,95 |
| 3_482 | Atik_Nov2016 | 21/11/2016 | 22,74648 | 89,50025 | 480  | 146,304 | 0,87 |
| 3_483 | Atik_Nov2016 | 21/11/2016 | 22,74648 | 89,4996  | 460  | 140,208 | 1,11 |
| 3_484 | Atik_Nov2016 | 21/11/2016 | 22,7457  | 89,49803 | 485  | 147,828 | 0,81 |
| 3_485 | Atik_Nov2016 | 21/11/2016 | 22,74531 | 89,49551 | 460  | 140,208 | 1,01 |

|       |              |            |          |          |     |         |      |
|-------|--------------|------------|----------|----------|-----|---------|------|
| 3_486 | Atik_Nov2016 | 21/11/2016 | 22,74547 | 89,49277 | 450 | 137,16  | 1,45 |
| 3_487 | Atik_Nov2016 | 21/11/2016 | 22,74149 | 89,50248 | 475 | 144,78  | 0,94 |
| 3_488 | Atik_Nov2016 | 21/11/2016 | 22,73697 | 89,50059 | 490 | 149,352 | 1,03 |
| 3_489 | Atik_Nov2016 | 21/11/2016 | 22,7382  | 89,50026 | 470 | 143,256 | 1,18 |
| 3_490 | Atik_Nov2016 | 21/11/2016 | 22,73846 | 89,49901 | 475 | 144,78  | 1,03 |
| 3_491 | Atik_Nov2016 | 21/11/2016 | 22,73872 | 89,4984  | 490 | 149,352 | 0,87 |
| 3_492 | Atik_Nov2016 | 21/11/2016 | 22,7386  | 89,49684 | 450 | 137,16  | 0,92 |
| 3_493 | Atik_Nov2016 | 21/11/2016 | 22,73764 | 89,50015 | 460 | 140,208 | 1,02 |
| 3_494 | Atik_Nov2016 | 21/11/2016 | 22,73518 | 89,49728 | 480 | 146,304 | 1    |
| 3_495 | Atik_Nov2016 | 21/11/2016 | 22,73536 | 89,49644 | 470 | 143,256 | 1,07 |
| 3_496 | Atik_Nov2016 | 21/11/2016 | 22,73504 | 89,49883 | 460 | 140,208 | 1,04 |
| 3_497 | Atik_Nov2016 | 21/11/2016 | 22,73379 | 89,49865 | 450 | 137,16  | 2,19 |
| 3_498 | Atik_Nov2016 | 21/11/2016 | 22,73412 | 89,49868 | 500 | 152,4   | 1,08 |
| 3_499 | Atik_Nov2016 | 21/11/2016 | 22,73222 | 89,49886 | 460 | 140,208 | 1,32 |
| 3_500 | Atik_Nov2016 | 21/11/2016 | 22,73111 | 89,49914 | 480 | 146,304 | 1,11 |
| 3_501 | Atik_Nov2016 | 21/11/2016 | 22,7289  | 89,49927 | 480 | 146,304 | 1,12 |
| 3_502 | Atik_Nov2016 | 21/11/2016 | 22,72787 | 89,49783 | 450 | 137,16  | 1,1  |
| 3_503 | Atik_Nov2016 | 21/11/2016 | 22,72609 | 89,49831 | 470 | 143,256 | 1,04 |
| 3_504 | Atik_Nov2016 | 21/11/2016 | 22,72298 | 89,49815 | 460 | 140,208 | 0,94 |
| 3_505 | Atik_Nov2016 | 21/11/2016 | 22,71814 | 89,5011  | 475 | 144,78  | 0,92 |
| 3_506 | Atik_Nov2016 | 21/11/2016 | 22,71638 | 89,50227 | 470 | 143,256 | 0,94 |
| 3_507 | Atik_Nov2016 | 21/11/2016 | 22,71077 | 89,50204 | 475 | 144,78  | 0,86 |
| 3_508 | Atik_Nov2016 | 21/11/2016 | 22,70887 | 89,50523 | 480 | 146,304 | 0,9  |
| 3_509 | Atik_Nov2016 | 21/11/2016 | 22,70737 | 89,50578 | 465 | 141,732 | 1,34 |
| 3_510 | Atik_Nov2016 | 21/11/2016 | 22,70365 | 89,50819 | 470 | 143,256 | 0,85 |
| 3_511 | Atik_Nov2016 | 21/11/2016 | 22,70176 | 89,50906 | 485 | 147,828 | 0,84 |
| 3_512 | Atik_Nov2016 | 21/11/2016 | 22,69916 | 89,51063 | 470 | 143,256 | 0,82 |
| 3_513 | Atik_Nov2016 | 21/11/2016 | 22,69786 | 89,51221 | 470 | 143,256 | 0,84 |
| 3_514 | Atik_Nov2016 | 21/11/2016 | 22,6963  | 89,51469 | 500 | 152,4   | 0,79 |
| 3_515 | Atik_Nov2016 | 21/11/2016 | 22,69445 | 89,51675 | 470 | 143,256 | 0,8  |
| 3_516 | Atik_Nov2016 | 21/11/2016 | 22,69193 | 89,52029 | 650 | 198,12  | 0,84 |
| 3_517 | Atik_Nov2016 | 21/11/2016 | 22,68943 | 89,52588 | 480 | 146,304 | 1,57 |
| 3_518 | Atik_Nov2016 | 21/11/2016 | 22,69036 | 89,51996 | 460 | 140,208 | 1,22 |
| 3_519 | Atik_Nov2016 | 21/11/2016 | 22,69707 | 89,51183 | 480 | 146,304 | 0,9  |
| 3_520 | Atik_Nov2016 | 21/11/2016 | 22,70194 | 89,50563 | 480 | 146,304 | 0,87 |
| 3_521 | Atik_Nov2016 | 21/11/2016 | 22,69333 | 89,50021 | 480 | 146,304 | 0,91 |
| 3_522 | Atik_Nov2016 | 21/11/2016 | 22,68765 | 89,49972 | 460 | 140,208 | 1,39 |
| 3_523 | Atik_Nov2016 | 21/11/2016 | 22,68667 | 89,49834 | 460 | 140,208 | 1,92 |
| 3_524 | Atik_Nov2016 | 21/11/2016 | 22,68578 | 89,49609 | 465 | 141,732 | 1,6  |
| 3_525 | Atik_Nov2016 | 22/11/2016 | 22,6792  | 89,51595 | 920 | 280,416 | 1,65 |
| 3_526 | Atik_Nov2016 | 22/11/2016 | 22,67857 | 89,51849 | 950 | 289,56  | 1,61 |
| 3_527 | Atik_Nov2016 | 22/11/2016 | 22,67813 | 89,51905 | 820 | 249,936 | 1,47 |
| 3_528 | Atik_Nov2016 | 22/11/2016 | 22,6773  | 89,51994 | 960 | 292,608 | 1,58 |
| 3_529 | Atik_Nov2016 | 22/11/2016 | 22,67592 | 89,52083 | 800 | 243,84  | 1,24 |
| 3_530 | Atik_Nov2016 | 22/11/2016 | 22,67448 | 89,52305 | 850 | 259,08  | 1,8  |
| 3_531 | Atik_Nov2016 | 24/11/2016 | 22,22475 | 89,12393 | 800 | 243,84  | 5,85 |
| 3_532 | Atik_Nov2016 | 24/11/2016 | 22,22268 | 89,12727 | 760 | 231,648 | 4,11 |

|       |              |            |          |          |      |         |      |
|-------|--------------|------------|----------|----------|------|---------|------|
| 3_533 | Atik_Nov2016 | 24/11/2016 | 22,2224  | 89,12749 | 770  | 234,696 | 3,77 |
| 3_534 | Atik_Nov2016 | 24/11/2016 | 22,22064 | 89,12804 | 780  | 237,744 | 4,54 |
| 3_535 | Atik_Nov2016 | 24/11/2016 | 22,22044 | 89,12898 | 760  | 231,648 | 3,44 |
| 3_536 | Atik_Nov2016 | 24/11/2016 | 22,2194  | 89,13046 | 680  | 207,264 | 2,77 |
| 3_537 | Atik_Nov2016 | 24/11/2016 | 22,21876 | 89,13173 | 700  | 213,36  | 2,64 |
| 3_538 | Atik_Nov2016 | 24/11/2016 | 22,21297 | 89,13908 | 660  | 201,168 | 1,65 |
| 3_539 | Atik_Nov2016 | 24/11/2016 | 22,21271 | 89,13927 | 620  | 188,976 | 1,43 |
| 3_540 | Atik_Nov2016 | 24/11/2016 | 22,21047 | 89,13973 | 450  | 137,16  | 1,54 |
| 3_541 | Atik_Nov2016 | 24/11/2016 | 22,20826 | 89,13935 | 550  | 167,64  | 1,12 |
| 3_542 | Atik_Nov2016 | 24/11/2016 | 22,20552 | 89,14056 | 530  | 161,544 | 1,05 |
| 3_543 | Atik_Nov2016 | 24/11/2016 | 22,20293 | 89,14537 | 420  | 128,016 | 0,89 |
| 3_544 | Atik_Nov2016 | 27/06/2016 | 22,31103 | 89,10581 | 500  | 152,4   | 4,12 |
| 3_545 | Atik_Dec2016 | 12/12/2016 | 22,70516 | 89,46252 | 540  | 164,592 | 0,37 |
| 3_546 | Atik_Dec2016 | 12/12/2016 | 22,69819 | 89,45314 | 540  | 164,592 | 1,09 |
| 3_547 | Atik_Dec2016 | 12/12/2016 | 22,69007 | 89,44701 | 500  | 152,4   | 2,78 |
| 3_548 | Atik_Dec2016 | 12/12/2016 | 22,68479 | 89,45716 | 560  | 170,688 | 1,56 |
| 3_549 | Atik_Dec2016 | 12/12/2016 | 22,68555 | 89,45666 | 570  | 173,736 | 2,09 |
| 3_550 | Atik_Dec2016 | 12/12/2016 | 22,68799 | 89,45709 | 560  | 170,688 | 1,05 |
| 3_551 | Atik_Dec2016 | 12/12/2016 | 22,69044 | 89,45678 | 600  | 182,88  | 0,74 |
| 3_552 | Atik_Dec2016 | 12/12/2016 | 22,69083 | 89,45866 | 570  | 173,736 | 0,69 |
| 3_553 | Atik_Dec2016 | 12/12/2016 | 22,69011 | 89,46066 | 580  | 176,784 | 0,67 |
| 3_554 | Atik_Dec2016 | 12/12/2016 | 22,68906 | 89,46312 | 570  | 173,736 | 0,69 |
| 3_555 | Atik_Dec2016 | 12/12/2016 | 22,68402 | 89,46565 | 540  | 164,592 | 0,98 |
| 3_556 | Atik_Dec2016 | 12/12/2016 | 22,67549 | 89,47052 | 570  | 173,736 | 1,37 |
| 3_557 | Atik_Dec2016 | 13/12/2016 | 22,71081 | 89,45573 | 490  | 149,352 | 0,66 |
| 3_558 | Atik_Dec2016 | 13/12/2016 | 22,70599 | 89,45438 | 480  | 146,304 | 0,73 |
| 3_559 | Atik_Dec2016 | 13/12/2016 | 22,70444 | 89,45362 | 480  | 146,304 | 0,81 |
| 3_560 | Atik_Dec2016 | 13/12/2016 | 22,69919 | 89,44791 | 490  | 149,352 | 1,14 |
| 3_561 | Atik_Dec2016 | 13/12/2016 | 22,6999  | 89,44804 | 506  | 154,229 | 1,19 |
| 3_562 | Atik_Dec2016 | 13/12/2016 | 22,70089 | 89,44554 | 1200 | 365,76  | 1,39 |
| 3_563 | Atik_Dec2016 | 13/12/2016 | 22,69923 | 89,43388 | 500  | 152,4   | 3,4  |
| 3_564 | Atik_Dec2016 | 13/12/2016 | 22,69927 | 89,43384 | 530  | 161,544 | 3,47 |
| 3_565 | Atik_Dec2016 | 13/12/2016 | 22,69696 | 89,43191 | 360  | 109,728 | 5,08 |
| 3_566 | Atik_Dec2016 | 13/12/2016 | 22,69602 | 89,4287  | 520  | 158,496 | 3,43 |
| 3_567 | Atik_Dec2016 | 13/12/2016 | 22,70468 | 89,42738 | 570  | 173,736 | 2,17 |
| 3_568 | Atik_Dec2016 | 13/12/2016 | 22,70474 | 89,42994 | 530  | 161,544 | 2,98 |
| 3_569 | Atik_Dec2016 | 13/12/2016 | 22,72873 | 89,42811 | 560  | 170,688 | 3,09 |
| 3_570 | Atik_Dec2016 | 13/12/2016 | 22,73027 | 89,42775 | 600  | 182,88  | 3,16 |
| 3_571 | Atik_Dec2016 | 13/12/2016 | 22,7331  | 89,42808 | 500  | 152,4   | 2,89 |
| 3_572 | Atik_Dec2016 | 14/12/2016 | 22,70388 | 89,465   | 610  | 185,928 | 1,13 |
| 3_573 | Atik_Dec2016 | 14/12/2016 | 22,70408 | 89,46406 | 555  | 169,164 | 0,95 |
| 3_574 | Atik_Dec2016 | 14/12/2016 | 22,70389 | 89,46717 | 575  | 175,26  | 0,93 |
| 3_575 | Atik_Dec2016 | 14/12/2016 | 22,69987 | 89,46884 | 600  | 182,88  | 1,13 |
| 3_576 | Atik_Dec2016 | 14/12/2016 | 22,66643 | 89,47163 | 670  | 204,216 | 5,7  |
| 3_577 | Atik_Dec2016 | 14/12/2016 | 22,66261 | 89,4802  | 570  | 173,736 | 5,75 |
| 3_578 | Atik_Dec2016 | 16/12/2016 | 22,55157 | 89,09527 | 780  | 237,744 | 1,35 |
| 3_579 | Atik_Dec2016 | 16/12/2016 | 22,55145 | 89,09227 | 480  | 146,304 | 1,66 |

|       |              |            |          |          |     |         |      |
|-------|--------------|------------|----------|----------|-----|---------|------|
| 3_580 | Atik_Dec2016 | 16/12/2016 | 22,29146 | 89,31569 | 600 | 182,88  | 5,19 |
| 3_581 | Atik_Dec2016 | 16/12/2016 | 22,27326 | 89,32395 | 650 | 198,12  | 3,4  |
| 3_582 | Atik_Dec2016 | 16/12/2016 | 22,27313 | 89,32344 | 850 | 259,08  | 3,33 |
| 3_583 | Atik_Dec2016 | 16/12/2016 | 22,27101 | 89,32582 | 680 | 207,264 | 1,8  |
| 3_584 | Atik_Dec2016 | 16/12/2016 | 22,26132 | 89,32675 | 500 | 152,4   | 0,63 |
| 3_585 | Atik_Dec2016 | 16/12/2016 | 22,25216 | 89,33543 | 510 | 155,448 | 0,62 |
| 3_586 | Atik_Dec2016 | 16/12/2016 | 22,24994 | 89,33116 | 520 | 158,496 | 0,65 |
| 3_587 | Atik_Dec2016 | 16/12/2016 | 22,24874 | 89,32666 | 570 | 173,736 | 1,44 |
| 3_588 | Atik_Dec2016 | 16/12/2016 | 22,2487  | 89,32949 | 510 | 155,448 | 0,63 |
| 3_589 | Atik_Dec2016 | 16/12/2016 | 22,24706 | 89,32964 | 520 | 158,496 | 0,62 |
| 3_590 | Atik_Dec2016 | 16/12/2016 | 22,24242 | 89,32964 | 580 | 176,784 | 0,89 |
| 3_591 | Atik_Dec2016 | 16/12/2016 | 22,24059 | 89,33087 | 550 | 167,64  | 0,68 |
| 3_592 | Atik_Dec2016 | 16/12/2016 | 22,24004 | 89,33319 | 520 | 158,496 | 0,65 |
| 3_593 | Atik_Dec2016 | 16/12/2016 | 22,24011 | 89,32848 | 520 | 158,496 | 0,67 |
| 3_594 | Atik_Dec2016 | 16/12/2016 | 22,23511 | 89,32793 | 520 | 158,496 | 0,72 |
| 3_595 | Atik_Dec2016 | 16/12/2016 | 22,2326  | 89,33032 | 520 | 158,496 | 0,69 |
| 3_596 | Atik_Dec2016 | 16/12/2016 | 22,23076 | 89,33147 | 520 | 158,496 | 0,71 |
| 3_597 | Atik_Dec2016 | 16/12/2016 | 22,229   | 89,33237 | 510 | 155,448 | 0,65 |
| 3_598 | Atik_Dec2016 | 16/12/2016 | 22,22773 | 89,33291 | 520 | 158,496 | 0,67 |
| 3_599 | Atik_Dec2016 | 16/12/2016 | 22,2269  | 89,33327 | 560 | 170,688 | 1,32 |
| 3_600 | Atik_Dec2016 | 16/12/2016 | 22,22104 | 89,3343  | 560 | 170,688 | 2,05 |
| 3_601 | Atik_Dec2016 | 16/12/2016 | 22,2192  | 89,33423 | 570 | 173,736 | 2,13 |
| 3_602 | Atik_Dec2016 | 16/12/2016 | 22,21874 | 89,33435 | 570 | 173,736 | 2,15 |
| 3_603 | Atik_Dec2016 | 17/12/2016 | 22,4153  | 89,27777 | 600 | 182,88  | 9,76 |
| 3_604 | Atik_Dec2016 | 17/12/2016 | 22,39772 | 89,28888 | 830 | 252,984 | 2,94 |
| 3_605 | Atik_Dec2016 | 17/12/2016 | 22,39355 | 89,28478 | 750 | 228,6   | 3,47 |
| 3_606 | Atik_Dec2016 | 17/12/2016 | 22,3915  | 89,28509 | 750 | 228,6   | 2,97 |
| 3_607 | Atik_Dec2016 | 17/12/2016 | 22,39196 | 89,28711 | 860 | 262,128 | 2,73 |
| 3_608 | Atik_Dec2016 | 17/12/2016 | 22,3921  | 89,28745 | 840 | 256,032 | 2,67 |
| 3_609 | Atik_Dec2016 | 17/12/2016 | 22,39305 | 89,28901 | 900 | 274,32  | 3,13 |
| 3_610 | Atik_Dec2016 | 17/12/2016 | 22,391   | 89,28484 | 900 | 274,32  | 3,1  |
| 3_611 | Atik_Dec2016 | 17/12/2016 | 22,38895 | 89,28431 | 900 | 274,32  | 3,24 |
| 3_612 | Atik_Dec2016 | 17/12/2016 | 22,38489 | 89,28197 | 860 | 262,128 | 4,15 |
| 3_613 | Atik_Dec2016 | 17/12/2016 | 22,37867 | 89,28841 | 750 | 228,6   | 2,59 |
| 3_614 | Atik_Dec2016 | 17/12/2016 | 22,3767  | 89,28904 | 900 | 274,32  | 3,16 |
| 3_615 | Atik_Dec2016 | 17/12/2016 | 22,37512 | 89,2892  | 850 | 259,08  | 2,69 |
| 3_616 | Atik_Dec2016 | 17/12/2016 | 22,372   | 89,28828 | 850 | 259,08  | 2,74 |
| 3_617 | Atik_Dec2016 | 17/12/2016 | 22,36561 | 89,29419 | 660 | 201,168 | 1,28 |
| 3_618 | Atik_Dec2016 | 17/12/2016 | 22,36159 | 89,29243 | 700 | 213,36  | 1,48 |
| 3_619 | Atik_Dec2016 | 17/12/2016 | 22,35573 | 89,29128 | 700 | 213,36  | 2,79 |
| 3_620 | Atik_Dec2016 | 17/12/2016 | 22,35226 | 89,29246 | 850 | 259,08  | 2,03 |
| 3_621 | Atik_Dec2016 | 17/12/2016 | 22,35037 | 89,2931  | 850 | 259,08  | 1,61 |
| 3_622 | Atik_Dec2016 | 17/12/2016 | 22,35157 | 89,29385 | 850 | 259,08  | 1,62 |
| 3_623 | Atik_Dec2016 | 17/12/2016 | 22,31505 | 89,29614 | 665 | 202,692 | 2,78 |
| 3_624 | Atik_Dec2016 | 17/12/2016 | 22,31609 | 89,29831 | 675 | 205,74  | 3,12 |
| 3_625 | Atik_Dec2016 | 17/12/2016 | 22,31292 | 89,29317 | 700 | 213,36  | 1,08 |
| 3_626 | Atik_Dec2016 | 17/12/2016 | 22,31115 | 89,29444 | 620 | 188,976 | 1,52 |

|       |              |            |          |          |     |         |      |
|-------|--------------|------------|----------|----------|-----|---------|------|
| 3_627 | Atik_Dec2016 | 17/12/2016 | 22,31013 | 89,29543 | 600 | 182,88  | 0,83 |
| 3_628 | Atik_Dec2016 | 17/12/2016 | 22,30403 | 89,30247 | 700 | 213,36  | 3,54 |
| 3_629 | Atik_Dec2016 | 17/12/2016 | 22,30655 | 89,30283 | 650 | 198,12  | 3,62 |
| 3_630 | Atik_Dec2016 | 17/12/2016 | 22,30978 | 89,30141 | 500 | 152,4   | 2,68 |
| 3_631 | Atik_Dec2016 | 17/12/2016 | 22,31217 | 89,30038 | 450 | 137,16  | 2,36 |
| 3_632 | Atik_Dec2016 | 17/12/2016 | 22,31367 | 89,29895 | 550 | 167,64  | 2,56 |
| 3_633 | Atik_Dec2016 | 17/12/2016 | 22,31041 | 89,29854 | 700 | 213,36  | 1,48 |
| 3_634 | Atik_Dec2016 | 17/12/2016 | 22,31011 | 89,29655 | 650 | 198,12  | 2,98 |
| 3_635 | Atik_Dec2016 | 17/12/2016 | 22,31507 | 89,29832 | 750 | 228,6   | 2,16 |
| 3_636 | Atik_Dec2016 | 17/12/2016 | 22,33106 | 89,29028 | 420 | 128,016 | 0,82 |
| 3_637 | Atik_Dec2016 | 17/12/2016 | 22,33343 | 89,28989 | 480 | 146,304 | 0,87 |
| 3_638 | Atik_Dec2016 | 17/12/2016 | 22,33318 | 89,29002 | 350 | 106,68  | 0,68 |
| 3_639 | Atik_Dec2016 | 17/12/2016 | 22,33421 | 89,29087 | 500 | 152,4   | 0,87 |
| 3_640 | Atik_Dec2016 | 17/12/2016 | 22,33327 | 89,29384 | 540 | 164,592 | 1,9  |
| 3_641 | Atik_Dec2016 | 17/12/2016 | 22,33166 | 89,2954  | 460 | 140,208 | 1,79 |
| 3_642 | Atik_Dec2016 | 17/12/2016 | 22,33253 | 89,2966  | 530 | 161,544 | 1,9  |
| 3_643 | Atik_Dec2016 | 17/12/2016 | 22,33287 | 89,29583 | 530 | 161,544 | 0,79 |
| 3_644 | Atik_Dec2016 | 17/12/2016 | 22,33442 | 89,29437 | 510 | 155,448 | 0,81 |
| 3_645 | Atik_Dec2016 | 17/12/2016 | 22,33877 | 89,28969 | 600 | 182,88  | 2,43 |
| 3_646 | Atik_Dec2016 | 17/12/2016 | 22,33803 | 89,28668 | 600 | 182,88  | 0,69 |
| 3_647 | Atik_Dec2016 | 17/12/2016 | 22,34407 | 89,29271 | 450 | 137,16  | 2,12 |
| 3_648 | Atik_Dec2016 | 17/12/2016 | 22,34196 | 89,29529 | 780 | 237,744 | 4,34 |
| 3_649 | Atik_Dec2016 | 17/12/2016 | 22,33977 | 89,29733 | 560 | 170,688 | 1,88 |
| 3_650 | Atik_Dec2016 | 17/12/2016 | 22,34846 | 89,29034 | 600 | 182,88  | 2,56 |
| 3_651 | Atik_Dec2016 | 18/12/2016 | 22,71229 | 89,47849 | 480 | 146,304 | 1,1  |
| 3_652 | Atik_Dec2016 | 18/12/2016 | 22,71181 | 89,48034 | 500 | 152,4   | 1,09 |
| 3_653 | Atik_Dec2016 | 18/12/2016 | 22,70835 | 89,4845  | 480 | 146,304 | 1,04 |
| 3_654 | Atik_Dec2016 | 18/12/2016 | 22,70793 | 89,48655 | 500 | 152,4   | 1,09 |
| 3_655 | Atik_Dec2016 | 18/12/2016 | 22,70793 | 89,48863 | 500 | 152,4   | 1,11 |
| 3_656 | Atik_Dec2016 | 18/12/2016 | 22,70952 | 89,49216 | 500 | 152,4   | 1,08 |
| 3_657 | Atik_Dec2016 | 18/12/2016 | 22,71054 | 89,49128 | 490 | 149,352 | 0,97 |
| 3_658 | Atik_Dec2016 | 18/12/2016 | 22,7132  | 89,48864 | 445 | 135,636 | 1,11 |
| 3_659 | Atik_Dec2016 | 18/12/2016 | 22,71457 | 89,48808 | 444 | 135,331 | 1,2  |
| 3_660 | Atik_Dec2016 | 18/12/2016 | 22,70752 | 89,49275 | 450 | 137,16  | 1,1  |
| 3_661 | Atik_Dec2016 | 18/12/2016 | 22,70376 | 89,47009 | 540 | 164,592 | 0,95 |
| 3_662 | Atik_Dec2016 | 18/12/2016 | 22,70383 | 89,47161 | 505 | 153,924 | 1,13 |
| 3_663 | Atik_Dec2016 | 18/12/2016 | 22,70192 | 89,47504 | 480 | 146,304 | 1    |
| 3_664 | Atik_Dec2016 | 18/12/2016 | 22,70176 | 89,47666 | 490 | 149,352 | 1,1  |
| 3_665 | Atik_Dec2016 | 18/12/2016 | 22,69592 | 89,47852 | 485 | 147,828 | 0,88 |
| 3_666 | Atik_Dec2016 | 18/12/2016 | 22,69573 | 89,47955 | 510 | 155,448 | 1,09 |
| 3_667 | Atik_Dec2016 | 18/12/2016 | 22,69343 | 89,47939 | 490 | 149,352 | 0,98 |
| 3_668 | Atik_Dec2016 | 18/12/2016 | 22,69165 | 89,47849 | 480 | 146,304 | 0,95 |
| 3_669 | Atik_Dec2016 | 18/12/2016 | 22,68927 | 89,47827 | 480 | 146,304 | 0,95 |
| 3_670 | Atik_Dec2016 | 18/12/2016 | 22,68818 | 89,48286 | 530 | 161,544 | 1,19 |
| 3_671 | Atik_Dec2016 | 18/12/2016 | 22,68608 | 89,48377 | 520 | 158,496 | 1,12 |
| 3_672 | Atik_Dec2016 | 18/12/2016 | 22,68757 | 89,48599 | 540 | 164,592 | 1,49 |
| 3_673 | Atik_Dec2016 | 18/12/2016 | 22,68719 | 89,48833 | 520 | 158,496 | 1,86 |

|       |                   |            |          |          |          |         |       |
|-------|-------------------|------------|----------|----------|----------|---------|-------|
| 3_674 | Atik_Dec2016      | 18/12/2016 | 22,68725 | 89,48785 | 500      | 152,4   | 1,87  |
| 3_675 | Atik_Dec2016      | 18/12/2016 | 22,68657 | 89,4899  | 500      | 152,4   | 4,84  |
| 3_676 | Atik_Dec2016      | 18/12/2016 | 22,68486 | 89,48285 | 550      | 167,64  | 1,07  |
| 3_677 | Atik_Dec2016      | 18/12/2016 | 22,68454 | 89,48168 | 520      | 158,496 | 1,09  |
| 3_678 | Atik_Dec2016      | 18/12/2016 | 22,68492 | 89,4789  | 510      | 155,448 | 1,13  |
| 3_679 | Atik_Dec2016      | 18/12/2016 | 22,67512 | 89,47881 | 460      | 140,208 | 1,01  |
| 3_680 | Atik_Dec2016      | 18/12/2016 | 22,6747  | 89,47997 | 520      | 158,496 | 0,93  |
| 3_681 | Atik_Dec2016      | 18/12/2016 | 22,67401 | 89,4814  | 520      | 158,496 | 0,99  |
| 3_682 | Atik_Dec2016      | 18/12/2016 | 22,67312 | 89,48298 | 520      | 158,496 | 0,87  |
| 3_683 | Atik_Dec2016      | 18/12/2016 | 22,67202 | 89,48549 | 480      | 146,304 | 1,08  |
| 3_684 | BWDB_WetSeason    | 28.11.2012 | 22,91786 | 89,80445 | 331,3648 | 101     | 7,51  |
| 3_685 | BWDB_WetSeason    | 28.11.2012 | 22,91445 | 89,80334 | 331,3648 | 101     | 7,73  |
| 3_686 | BWDB_WetSeason    | 28.11.2012 | 22,90993 | 89,79764 | 331,3648 | 101     | 5,76  |
| 3_687 | BWDB_WetSeason    | 28.11.2012 | 22,90624 | 89,79213 | 331,3648 | 101     | 5,41  |
| 3_688 | BWDB_WetSeason    | 29.11.2012 | 22,26621 | 89,86118 | 331,3648 | 101     | 19,38 |
| 3_689 | BWDB_WetSeason    | 29.11.2012 | 22,4748  | 89,86149 | 331,3648 | 101     | 20,6  |
| 3_690 | BWDB_WetSeason    | 29.11.2012 | 22,48338 | 89,86168 | 351,0499 | 107     | 21,3  |
| 3_691 | BWDB_WetSeason    | 07.11.2012 | 22,88477 | 89,54234 | 341,2073 | 104     | 0,832 |
| 3_692 | BWDB_WetSeason    | 12.11.2012 | 22,61735 | 89,2985  | 344,4882 | 105     | 5,6   |
| 3_693 | BWDB_WetSeason    | 07.11.2012 | 22,79737 | 89,59799 | 344,4882 | 105     | 3,74  |
| 3_694 | BWDB_WetSeason    | 07.11.2012 | 22,79115 | 89,60555 | 344,4882 | 105     | 3,23  |
| 3_695 | BWDB_WetSeason    | 07.11.2012 | 22,78184 | 89,617   | 331,3648 | 101     | 3,75  |
| 3_696 | BWDB_WetSeason    | 08.11.2012 | 22,91681 | 89,57468 | 331,3648 | 101     | 4,19  |
| 3_697 | BWDB_WetSeason    | 08.11.2012 | 22,91446 | 89,58376 | 331,3648 | 101     | 4,03  |
| 3_698 | BWDB_WetSeason    | 08.11.2012 | 22,91273 | 89,59302 | 331,3648 | 101     | 1,144 |
| 3_699 | BWDB_WetSeason    | 08.11.2012 | 22,91216 | 89,60472 | 331,3648 | 101     | 2,58  |
| 3_700 | BWDB_WetSeason    | 08.11.2012 | 22,91352 | 89,61024 | 331,3648 | 101     | 2,08  |
| 3_701 | BWDB_WetSeason    | 26.08.2013 | 22,70538 | 89,6917  | 574,147  | 175     | 0,989 |
| 3_702 | BWDB_WetSeason    | 26.08.2013 | 22,70534 | 89,6918  | 787,4016 | 240     | 1,21  |
| 3_703 | BWDB_WetSeason    | 26.08.2013 | 22,70528 | 89,69202 | 912,0735 | 278     | 1,162 |
| 3_704 | BWDB_WetSeason    | 16.07.2012 | 22,83315 | 89,5462  | 879,2651 | 268     | 2,18  |
| 3_705 | BWDB_WetSeason    | 21.10.2012 | 22,83973 | 89,65013 | 347,769  | 106     | 3,82  |
| 3_706 | BWDB_WetSeason    | 21.10.2012 | 22,83976 | 89,65017 | 639,7638 | 195     | 2,41  |
| 3_707 | BWDB_WetSeason    | 21.10.2012 | 22,83965 | 89,65006 | 866,1417 | 264     | 3,11  |
| 3_708 | BWDB_WetSeason    | 10.11.2012 | 22,6375  | 89,12613 | 498,6877 | 152     | 3,11  |
| 3_709 | BWDB_WetSeason    | 10.11.2012 | 22,6378  | 89,12622 | 859,5801 | 262     | 6,25  |
| 3_710 | BWDB_WetSeason    | 20.10.2012 | 22,27908 | 89,31133 | 380,5774 | 116     | 8,71  |
| 3_711 | BWDB_WetSeason    | 20.10.2012 | 22,27927 | 89,31125 | 715,2231 | 218     | 2,73  |
| 3_712 | Fieldwork_Jan2018 |            | 22,58327 | 89,1194  | 400      | 121,92  | 1,821 |
| 3_713 | Fieldwork_Jan2018 |            | 22,5689  | 89,11626 | 450      | 137,16  | 2,21  |
| 3_714 | Fieldwork_Jan2018 |            | 22,44849 | 89,17014 | 530      | 161,544 | 1,138 |
| 3_715 | Fieldwork_Jan2018 |            | 22,44825 | 89,17419 | 440      | 134,112 | 1,039 |
| 3_716 | Fieldwork_Jan2018 |            | 22,44889 | 89,15817 | 545      | 166,116 | 2,718 |
| 3_717 | Fieldwork_Jan2018 |            | 22,65955 | 89,08746 | 700      | 213,36  | 1,05  |
| 3_718 | Fieldwork_Jan2018 |            | 22,57006 | 89,11187 | 400      | 121,92  | 1,292 |
| 3_719 | Fieldwork_Jan2017 | 22/01/2017 | 22,6184  | 89,4247  | 1200     | 365,76  | 1,924 |
| 3_720 | Fieldwork_May2016 | 20/05/2016 | 22,5483  | 89,17061 | 580      | 176,32  | 8,31  |

|       |                   |            |          |          |      |          |        |
|-------|-------------------|------------|----------|----------|------|----------|--------|
| 3_721 | Fieldwork_May2016 | 20/05/2016 | 22,48686 | 89,15917 | 450  | 136,8    | 1,796  |
| 3_722 | Fieldwork_May2016 | 20/05/2016 | 22,49299 | 89,15923 | 450  | 136,8    | 2,056  |
| 3_723 | Fieldwork_May2016 | 20/05/2016 | 22,49883 | 89,15999 | 480  | 145,92   | 1,524  |
| 3_724 | Fieldwork_May2016 | 20/05/2016 | 22,50344 | 89,15905 | 470  | 142,88   | 1,446  |
| 3_725 | Fieldwork_May2016 | 20/05/2016 | 22,52337 | 89,15667 | 460  | 139,84   | 0,899  |
| 3_726 | Fieldwork_May2016 | 20/05/2016 | 22,52598 | 89,15731 | 480  | 145,92   | 0,958  |
| 3_727 | Fieldwork_May2016 | 22/05/2016 | 22,51764 | 89,15203 | 470  | 142,88   | 0,863  |
| 3_728 | Fieldwork_May2016 | 23/05/2016 | 22,5027  | 89,15784 | 555  | 168,72   | 1,834  |
| 3_729 | Fieldwork_May2016 | 23/05/2016 | 22,50342 | 89,15837 | 480  | 145,92   | 1,31   |
| 3_730 | Fieldwork_May2016 | 23/05/2016 | 22,50292 | 89,15641 | 495  | 150,48   | 1,294  |
| 3_731 | Fieldwork_May2016 | 23/05/2016 | 22,50396 | 89,15629 | 520  | 158,08   | 1,365  |
| 3_732 | Fieldwork_May2016 | 23/05/2016 | 22,50337 | 89,15543 | 480  | 145,92   | 1,188  |
| 3_733 | Fieldwork_May2016 | 23/05/2016 | 22,50564 | 89,15008 | 480  | 145,92   | 1,132  |
| 3_734 | Fieldwork_May2016 | 23/05/2016 | 22,50622 | 89,14898 | 575  | 174,8    | 1,031  |
| 3_735 | Fieldwork_May2016 | 23/05/2016 | 22,5071  | 89,14704 | 590  | 179,36   | 1,109  |
| 3_736 | Fieldwork_May2016 | 23/05/2016 | 22,50963 | 89,17436 | 520  | 158,08   | 0,902  |
| 3_737 | Fieldwork_May2016 | 23/05/2016 | 22,50972 | 89,17466 | 510  | 155,04   | 0,892  |
| 3_738 | Fieldwork_May2016 | 23/05/2016 | 22,50811 | 89,17609 | 480  | 145,92   | 0,85   |
| 3_739 | Fieldwork_May2016 | 24/05/2016 | 22,50354 | 89,16197 | 440  | 133,76   | 1,251  |
| 3_740 | Fieldwork_May2016 | 24/05/2016 | 22,5018  | 89,1614  | 490  | 148,96   | 1,376  |
| 3_741 | Fieldwork_May2016 | 30/05/2016 | 22,60615 | 89,52056 | 800  | 243      | 5,714  |
| 3_742 | Fieldwork_May2016 | 30/05/2016 | 22,60061 | 89,51821 | 1200 | 364,8    | 4,161  |
| 3_743 | Vanderbilt_data   |            | 22,871   | 89,3074  | 545  | 166,116  | 0,6667 |
| 3_744 | Vanderbilt_data   |            | 22,8724  | 89,3134  | 533  | 162,4584 | 0,6566 |
| 3_745 | Vanderbilt_data   |            | 22,8699  | 89,3106  | 530  | 161,544  | 0,6468 |
| 3_746 | Vanderbilt_data   |            | 22,8688  | 89,3108  | 530  | 161,544  | 0,6481 |
| 3_747 | Vanderbilt_data   |            | 22,8682  | 89,3087  | 900  | 274,32   | 0,657  |
| 3_748 | Vanderbilt_data   |            | 22,8645  | 89,3053  | 420  | 128,016  | 0,666  |
| 3_749 | Vanderbilt_data   |            | 22,8653  | 89,3075  | 760  | 231,648  | 0,6701 |
| 3_750 | Vanderbilt_data   |            | 22,8669  | 89,3073  | 558  | 170,0784 | 0,6753 |
| 3_751 | Vanderbilt_data   |            | 22,7239  | 89,891   | 600  | 182,88   | 16,856 |
| 3_752 | Vanderbilt_data   |            | 22,6243  | 89,1329  | 700  | 213,36   | 5,996  |
| 3_753 | Vanderbilt_data   |            | 22,6222  | 89,1302  | 715  | 217,932  | 4,766  |
| 3_754 | Vanderbilt_data   |            | 22,7148  | 89,1864  | 556  | 169,4688 | 4,492  |
| 3_755 | Vanderbilt_data   |            | 22,7123  | 89,2001  | 650  | 198,12   | 9,962  |
| 3_756 | Vanderbilt_data   |            | 22,7094  | 89,1916  | 554  | 168,8592 | 4,518  |
| 3_757 | Vanderbilt_data   |            | 22,7249  | 89,192   | 530  | 161,544  | 2,85   |
| 3_758 | Vanderbilt_data   |            | 22,7358  | 89,1722  | 800  | 243,84   | 11,752 |
| 3_759 | Vanderbilt_data   |            | 22,7309  | 89,1788  | 350  | 106,68   | 1,517  |
| 3_760 | Vanderbilt_data   |            | 23,064   | 88,9939  | 643  | 195,9864 | 1,586  |
| 3_761 | Vanderbilt_data   |            | 23,0673  | 88,9952  | 350  | 106,68   | 0,8708 |
| 3_762 | Vanderbilt_data   |            | 23,0674  | 88,9973  | 659  | 200,8632 | 1,711  |
| 3_763 | Vanderbilt_data   |            | 23,0642  | 88,9961  | 682  | 207,8736 | 1,839  |
| 3_764 | Vanderbilt_data   |            | 23,0603  | 88,9954  | 673  | 205,1304 | 1,038  |
| 3_765 | Vanderbilt_data   |            | 22,4523  | 89,1567  | 500  | 152,4    | 4,973  |
| 3_766 | Vanderbilt_data   |            | 22,4521  | 89,1573  | 500  | 152,4    | 3,181  |
| 3_767 | Vanderbilt_data   |            | 22,4512  | 89,158   | 460  | 140,208  | 3,388  |

|       |                     |            |          |          |     |          |         |      |
|-------|---------------------|------------|----------|----------|-----|----------|---------|------|
| 3_768 | Vanderbilt_data     |            | 22,4593  | 89,2561  | 500 | 152,4    | 1,847   |      |
| 3_769 | Vanderbilt_data     |            | 22,4579  | 89,1552  | 940 | 286,512  | 2,091   |      |
| 3_770 | Vanderbilt_data     |            | 22,4579  | 89,1552  | 560 | 170,688  | 2,032   |      |
| 3_771 | Vanderbilt_data     |            | 22,4542  | 89,157   | 540 | 164,592  | 2,135   |      |
| 3_772 | Vanderbilt_data     |            | 22,452   | 89,1559  | 540 | 164,592  | 3,955   |      |
| 3_773 | Vanderbilt_data     |            | 22,4518  | 89,1594  | 560 | 170,688  | 2,727   |      |
| 3_774 | Vanderbilt_data     |            | 23,0021  | 89,5698  | 820 | 249,936  | 4,307   |      |
| 3_775 | Vanderbilt_data     |            | 22,2353  | 89,3038  | 560 | 170,688  | 2,468   |      |
| 3_776 | Vanderbilt_data     |            | 22,242   | 89,2967  | 640 | 195,072  | 4,745   |      |
| 3_777 | Vanderbilt_data     |            | 22,2836  | 89,2743  | 728 | 221,8944 | 3,684   |      |
| 3_778 | Vanderbilt_data     |            | 22,2837  | 89,2741  | 750 | 228,6    | 3,472   |      |
| 3_779 | Vanderbilt_data     |            | 22,9781  | 89,4709  | 370 | 112,776  | 1,009   |      |
| 3_780 | Vanderbilt_data     |            | 22,9828  | 89,4728  | 960 | 292,608  | 1,152   |      |
| 3_781 | Vanderbilt_data     |            | 22,9788  | 89,4746  | 950 | 289,56   | 1,131   |      |
| 3_782 | Vanderbilt_data     |            | 22,9768  | 89,4763  | 900 | 274,32   | 1,174   |      |
| 3_783 | Vanderbilt_data     |            | 22,9766  | 89,4749  | 950 | 289,56   | 1,116   |      |
| 3_784 | Vanderbilt_data     |            | 22,9725  | 89,4764  | 960 | 292,608  | 0,7555  |      |
| 3_785 | Vanderbilt_data     |            | 22,9685  | 89,4762  | 970 | 295,656  | 0,7538  |      |
| 3_786 | Vanderbilt_data     |            | 22,9759  | 89,4729  | 960 | 292,608  | 1,088   |      |
| 3_787 | JD_fieldwork_jan201 | 26/01/2018 | 22,54172 | 89,17418 | 400 | 121,92   | 4,327   |      |
| 3_788 | BGS_database        | 25/03/1998 | 22,8     | 89,645   |     | 131      | 1,21022 | 34,6 |
| 3_789 | BGS_database        | 24/03/1998 | 22,756   | 89,527   |     | 143      | 1,4971  | 165  |
| 3_790 | BGS_database        | 28/03/1998 | 22,86    | 89,04    |     | 148      | 1,25906 | 56,8 |
| 3_791 | BGS_database        | 29/03/1998 | 22,535   | 89,12    |     | 157      | 1,7259  | 269  |
| 3_792 | BGS_database        | 26/03/1998 | 22,788   | 89,578   |     | 180      | 1,4751  | 155  |
| 3_793 | BGS_database        | 28/03/1998 | 22,782   | 89,251   |     | 182      | 1,17832 | 20,1 |
| 3_794 | BGS_database        | 24/03/1998 | 22,856   | 89,359   |     | 184      | 1,24762 | 51,6 |
| 3_795 | BGS_database        | 29/03/1998 | 22,371   | 89,175   |     | 187      | 1,9393  | 366  |
| 3_796 | BGS_database        | 24/03/1998 | 22,737   | 89,519   |     | 187      | 1,5653  | 196  |
| 3_797 | BGS_database        | 27/03/1998 | 22,647   | 88,934   |     | 203      | 1,3893  | 116  |
| 3_798 | BGS_database        | 26/03/1998 | 22,803   | 89,579   |     | 213      | 1,3871  | 115  |
| 3_799 | BGS_database        | 27/03/1998 | 22,693   | 88,985   |     | 217      | 1,30394 | 77,2 |
| 3_800 | BGS_database        | 27/03/1998 | 22,685   | 89,122   |     | 223      | 1,8359  | 319  |
| 3_801 | BGS_database        | 27/03/1998 | 22,393   | 88,998   |     | 236      | 1,8183  | 311  |
| 3_802 | BGS_database        | 26/03/1998 | 22,866   | 89,541   |     | 246      | 1,5873  | 206  |
| 3_803 | BGS_database        | 28/03/1998 | 22,608   | 89,001   |     | 262      | 1,26192 | 58,1 |
| 3_804 | BGS_database        | 23/03/1998 | 22,966   | 89,479   |     | 262      | 1,3761  | 110  |
| 3_805 | BGS_database        | 23/03/1998 | 22,918   | 89,601   |     | 271      | 1,7567  | 283  |
| 3_806 | BGS_database        | 01/04/1998 | 22,575   | 89,659   |     | 276      | 2,5575  | 647  |
| 3_807 | BGS_database        | 25/03/1998 | 22,778   | 89,706   |     | 276      | 2,0955  | 437  |
| 3_808 | BGS_database        | 01/04/1998 | 22,658   | 89,771   |     | 277      | 2,0713  | 426  |
| 3_809 | BGS_database        | 23/03/1998 | 22,819   | 89,421   |     | 279      | 1,27424 | 63,7 |
| 3_810 | BGS_database        | 31/03/1998 | 22,902   | 89,768   |     | 279      | 1,7523  | 281  |
| 3_811 | BGS_database        | 01/04/1998 | 22,671   | 89,694   |     | 282      | 1,5609  | 194  |



|       |              |            |        |        |     |        |      |
|-------|--------------|------------|--------|--------|-----|--------|------|
| 3_812 | BGS_database | 31/03/1998 | 22,718 | 89,668 | 282 | 1,7523 | 281  |
| 3_813 | BGS_database | 23/03/1998 | 22,887 | 89,535 | 282 | 1,8271 | 315  |
| 3_814 | BGS_database | 26/03/1998 | 22,809 | 89,398 | 295 | 1,4773 | 156  |
| 3_815 | BGS_database | 25/03/1998 | 22,813 | 89,644 | 295 | 3,5321 | 1090 |
| 3_816 | BGS_database | 24/03/1998 | 22,717 | 89,581 | 305 | 1,8645 | 332  |
| 3_817 | BGS_database | 25/03/1998 | 22,797 | 89,589 | 308 | 1,6731 | 245  |
| 3_818 | BGS_database | 26/03/1998 | 22,831 | 89,543 | 308 | 1,5763 | 201  |
| 3_819 | BGS_database | 26/03/1998 | 22,811 | 89,555 | 310 | 1,4443 | 141  |
| 3_820 | BGS_database | 26/03/1998 | 22,743 | 89,552 | 312 | 1,5477 | 188  |
| 3_821 | BGS_database | 26/03/1998 | 22,837 | 89,55  | 312 | 1,5433 | 186  |
| 3_822 | BGS_database | 25/03/1998 | 22,84  | 89,584 | 322 | 1,5653 | 196  |
| 3_823 | BGS_database | 26/03/1998 | 22,799 | 89,538 | 323 | 1,5169 | 174  |
| 3_824 | BGS_database | 26/03/1998 | 22,816 | 89,568 | 323 | 1,5829 | 204  |
| 3_825 | BGS_database | 24/03/1998 | 22,672 | 89,53  | 331 | 1,9085 | 352  |
| 3_826 | BGS_database | 23/03/1998 | 22,953 | 89,434 | 340 | 1,4707 | 153  |
| 3_827 | BGS_database | 26/03/1998 | 22,862 | 89,525 | 344 | 1,9679 | 379  |

#### Arsenic < 100 m

| ID   | Data_sourc    | date       | Lat      | Long     | Depth_ft | Depth_m | Arsenic |
|------|---------------|------------|----------|----------|----------|---------|---------|
| 4_1  | Abir_nov_2015 | 24/03/2016 | 22,65849 | 89,79628 | 22       | 6,7056  | 0       |
| 4_2  | Abir_nov_2015 | 11/04/2016 | 22,48178 | 89,82471 | 38       | 11,5824 | 0       |
| 4_3  | Abir_nov_2015 | 29/03/2016 | 22,66856 | 89,75413 | 40       | 12,192  | 0       |
| 4_4  | Abir_nov_2015 | 30/03/2016 | 22,67942 | 89,84235 | 40       | 12,192  | 0,05    |
| 4_5  | Abir_nov_2015 | 03/04/2016 | 22,63362 | 89,85152 | 40       | 12,192  | 0,1     |
| 4_6  | Abir_nov_2015 | 10/04/2016 | 22,46337 | 89,91423 | 40       | 12,192  | 0,2     |
| 4_7  | Abir_nov_2015 | 21/04/2016 | 22,70734 | 89,02425 | 40       | 12,192  | 0,1     |
| 4_8  | Abir_nov_2015 | 30/03/2016 | 22,67913 | 89,84271 | 45       | 13,716  | 0,1     |
| 4_9  | Abir_nov_2015 | 28/03/2016 | 22,6429  | 89,76956 | 50       | 15,24   | 0,3     |
| 4_10 | Abir_nov_2015 | 29/03/2016 | 22,67215 | 89,75214 | 55       | 16,764  | 0,2     |
| 4_11 | Abir_nov_2015 | 29/03/2016 | 22,64945 | 89,80816 | 55       | 16,764  | 0       |
| 4_12 | Abir_nov_2015 | 23/04/2016 | 22,80017 | 89,02813 | 55       | 16,764  | 0,05    |
| 4_13 | Abir_nov_2015 | 12/04/2016 | 22,44971 | 89,86031 | 60       | 18,288  | 0       |
| 4_14 | Abir_nov_2015 | 23/03/2016 | 22,68076 | 89,79252 | 70       | 21,336  | 0,1     |
| 4_15 | Abir_nov_2015 | 28/03/2016 | 22,64234 | 89,77435 | 70       | 21,336  | 0,3     |
| 4_16 | Abir_nov_2015 | 12/04/2016 | 22,45073 | 89,85667 | 70       | 21,336  | 0       |
| 4_17 | Abir_nov_2015 | 21/04/2016 | 22,70327 | 89,01965 | 70       | 21,336  | 0,1     |
| 4_18 | Abir_nov_2015 | 24/04/2016 | 22,635   | 89,12711 | 70       | 21,336  | 0,1     |
| 4_19 | Abir_nov_2015 | 24/04/2016 | 22,64131 | 89,12672 | 70       | 21,336  | 0,025   |
| 4_20 | Abir_nov_2015 | 30/03/2016 | 22,62645 | 89,83863 | 74       | 22,5552 | 0,3     |
| 4_21 | Abir_nov_2015 | 24/04/2016 | 22,64031 | 89,12288 | 75       | 22,86   | 0,05    |
| 4_22 | Abir_nov_2015 | 15/03/2016 | 22,76171 | 89,0664  | 80       | 24,384  | 0,1     |
| 4_23 | Abir_nov_2015 | 10/04/2016 | 22,45133 | 89,91484 | 80       | 24,384  | 0,025   |
| 4_24 | Abir_nov_2015 | 28/03/2016 | 22,6345  | 89,77714 | 85       | 25,908  | 0       |
| 4_25 | Abir_nov_2015 | 19/04/2016 | 22,77978 | 89,08119 | 95       | 28,956  | 0,1     |
| 4_26 | Abir_nov_2015 | 24/03/2016 | 22,64581 | 89,77196 | 100      | 30,48   | 0,1     |

|      |                  |            |          |          |          |        |       |
|------|------------------|------------|----------|----------|----------|--------|-------|
| 4_27 | Abir_nov_2015    | 11/04/2016 | 22,48196 | 89,83861 | 100      | 30,48  | 0,01  |
| 4_28 | Abir_nov_2015    | 23/04/2016 | 22,81413 | 89,03596 | 100      | 30,48  | 0,2   |
| 4_29 | Abir_nov_2015    | 24/04/2016 | 22,64117 | 89,12644 | 100      | 30,48  | 0,05  |
| 4_30 | Abir_nov_2015    | 19/04/2016 | 22,80211 | 89,06818 | 110      | 33,528 | 0,1   |
| 4_31 | Abir_nov_2015    | 24/04/2016 | 22,64667 | 89,12268 | 110      | 33,528 | 0,1   |
| 4_32 | Abir_nov_2015    | 30/03/2016 | 22,68438 | 89,80374 | 120      | 36,576 | 0,01  |
| 4_33 | Abir_nov_2015    | 10/04/2016 | 22,46206 | 89,88901 | 120      | 36,576 | 0,01  |
| 4_34 | Abir_nov_2015    | 20/04/2016 | 22,74746 | 89,06236 | 125      | 38,1   | 0,025 |
| 4_35 | Abir_nov_2015    | 30/03/2016 | 22,67373 | 89,79291 | 130      | 39,624 | 0,1   |
| 4_36 | Abir_nov_2015    | 15/03/2016 | 22,74922 | 89,05547 | 155      | 47,244 | 0,1   |
| 4_37 | Abir_nov_2015    | 23/04/2016 | 22,81398 | 89,03628 | 160      | 48,768 | 0,2   |
| 4_38 | Abir_nov_2015    | 19/04/2016 | 22,791   | 89,07583 | 170      | 51,816 | 0,025 |
| 4_39 | Abir_nov_2015    | 19/04/2016 | 22,79535 | 89,07323 | 170      | 51,816 | 0,1   |
| 4_40 | Abir_nov_2015    | 24/04/2016 | 22,63779 | 89,12594 | 180      | 54,864 | 0,1   |
| 4_41 | Abir_nov_2015    | 14/03/2016 | 22,81086 | 89,03616 | 200      | 60,96  | 0,3   |
| 4_42 | Abir_nov_2015    | 15/03/2016 | 22,78498 | 89,06475 | 200      | 60,96  | 0,05  |
| 4_43 | Ayers_et_al_2016 | 5/18/2012  | 22,5328  | 89,48459 | 49,86877 | 15,2   | 0,016 |
| 4_44 | Ayers_et_al_2016 | 5/18/2012  | 22,5284  | 89,48266 | 64,96063 | 19,8   | 0,084 |
| 4_45 | Ayers_et_al_2016 | 5/19/2012  | 22,5468  | 89,48155 | 69,88189 | 21,3   | 0,013 |
| 4_46 | Ayers_et_al_2016 | 5/14/2012  | 22,5015  | 89,43368 | 75,13123 | 22,9   | 0,176 |
| 4_47 | Ayers_et_al_2016 | 5/19/2012  | 22,5464  | 89,48309 | 75,13123 | 22,9   | 0,026 |
| 4_48 | Ayers_et_al_2016 | 10/17/2012 | 22,5067  | 89,49078 | 75,13123 | 22,9   | 0,017 |
| 4_49 | Ayers_et_al_2016 | 5/17/2012  | 22,5353  | 89,4894  | 84,97375 | 25,9   | 0,013 |
| 4_50 | Ayers_et_al_2016 | 5/22/2012  | 22,4591  | 89,46317 | 89,89501 | 27,4   | 0,027 |
| 4_51 | Ayers_et_al_2016 | 10/17/2012 | 22,5074  | 89,47437 | 89,89501 | 27,4   | 0,031 |
| 4_52 | Ayers_et_al_2016 | 10/16/2012 | 22,548   | 89,48187 | 95,14436 | 29     | 0,031 |
| 4_53 | Ayers_et_al_2016 | 05/07/2013 | 22,5069  | 89,47282 | 109,9081 | 33,5   | 0,008 |
| 4_54 | Ayers_et_al_2016 | 5/14/2012  | 22,5454  | 89,45316 | 120,0787 | 36,6   | 0,062 |
| 4_55 | Ayers_et_al_2016 | 5/16/2012  | 22,5254  | 89,43926 | 120,0787 | 36,6   | 0,02  |
| 4_56 | Ayers_et_al_2016 | 10/19/2012 | 22,4704  | 89,45921 | 120,0787 | 36,6   | 0,032 |
| 4_57 | Ayers_et_al_2016 | 05/05/2013 | 22,4703  | 89,45928 | 120,0787 | 36,6   | 0,001 |
| 4_58 | Ayers_et_al_2016 | 10/18/2012 | 22,4362  | 89,44785 | 120,0787 | 36,6   | 0,206 |
| 4_59 | Ayers_et_al_2016 | 5/19/2012  | 22,5336  | 89,50079 | 126,9685 | 38,7   | 0,067 |
| 4_60 | Ayers_et_al_2016 | 10/17/2012 | 22,4398  | 89,45284 | 129,9213 | 39,6   | 0,028 |
| 4_61 | Ayers_et_al_2016 | 5/19/2012  | 22,5335  | 89,50103 | 134,8425 | 41,1   | 0,094 |
| 4_62 | Ayers_et_al_2016 | 5/22/2012  | 22,4582  | 89,44549 | 134,8425 | 41,1   | 0,114 |
| 4_63 | Ayers_et_al_2016 | 5/19/2012  | 22,5336  | 89,50069 | 137,1391 | 41,8   | 0,08  |
| 4_64 | Ayers_et_al_2016 | 5/19/2012  | 22,5335  | 89,50137 | 138,1234 | 42,1   | 0,053 |
| 4_65 | Ayers_et_al_2016 | 5/20/2012  | 22,5087  | 89,49119 | 140,0919 | 42,7   | 0,03  |
| 4_66 | Ayers_et_al_2016 | 10/19/2012 | 22,4587  | 89,44812 | 140,0919 | 42,7   | 0,104 |
| 4_67 | Ayers_et_al_2016 | 5/22/2012  | 22,4589  | 89,44805 | 140,0919 | 42,7   | 0,254 |
| 4_68 | Ayers_et_al_2016 | 5/22/2012  | 22,4315  | 89,45149 | 140,0919 | 42,7   | 0,104 |
| 4_69 | Ayers_et_al_2016 | 5/23/2012  | 22,4274  | 89,45037 | 140,0919 | 42,7   | 0,048 |
| 4_70 | Ayers_et_al_2016 | 10/18/2012 | 22,4278  | 89,4502  | 140,0919 | 42,7   | 0,064 |
| 4_71 | Ayers_et_al_2016 | 5/23/2012  | 22,4278  | 89,45019 | 140,0919 | 42,7   | 0,043 |
| 4_72 | Ayers_et_al_2016 | 5/21/2012  | 22,4703  | 89,45889 | 145,0131 | 44,2   | 0,021 |
| 4_73 | Ayers_et_al_2016 | 5/20/2012  | 22,5095  | 89,49123 | 149,9344 | 45,7   | 0,032 |

|       |                  |            |         |          |          |      |        |
|-------|------------------|------------|---------|----------|----------|------|--------|
| 4_74  | Ayers_et_al_2016 | 5/21/2012  | 22,4788 | 89,46037 | 149,9344 | 45,7 | 0,115  |
| 4_75  | Ayers_et_al_2016 | 5/22/2012  | 22,4364 | 89,44794 | 149,9344 | 45,7 | 0,158  |
| 4_76  | Ayers_et_al_2016 | 5/17/2012  | 22,5167 | 89,49593 | 160,105  | 48,8 | 0,062  |
| 4_77  | Ayers_et_al_2016 | 5/22/2012  | 22,4332 | 89,45162 | 169,9475 | 51,8 | 0,078  |
| 4_78  | BGS_hydrochem    | 29/03/1998 | 22,305  | 89,111   | 22,96588 | 7    | 0,002  |
| 4_79  | BGS_hydrochem    | 29/03/1998 | 22,333  | 89,04    | 29,52756 | 9    | 0,0174 |
| 4_80  | BGS_hydrochem    | 30/03/1998 | 22,606  | 89,85    | 29,52756 | 9    | 0,0456 |
| 4_81  | BGS_hydrochem    | 29/03/1998 | 22,366  | 89,071   | 29,52756 | 9    | 0,01   |
| 4_82  | BGS_hydrochem    | 30/03/1998 | 22,311  | 89,846   | 32,8084  | 10   | 0      |
| 4_83  | BGS_hydrochem    | 27/03/1998 | 22,49   | 89,059   | 32,8084  | 10   | 0,024  |
| 4_84  | BGS_hydrochem    | 30/03/1998 | 22,263  | 89,834   | 32,8084  | 10   | 0,0018 |
| 4_85  | BGS_hydrochem    | 30/03/1998 | 22,287  | 89,844   | 32,8084  | 10   | 0,0601 |
| 4_86  | BGS_hydrochem    | 31/03/1998 | 22,313  | 89,854   | 32,8084  | 10   | 0,0248 |
| 4_87  | BGS_hydrochem    | 27/03/1998 | 22,455  | 89,028   | 36,08924 | 11   | 0,0051 |
| 4_88  | BGS_hydrochem    | 27/03/1998 | 22,628  | 89,122   | 39,37008 | 12   | 0,0401 |
| 4_89  | BGS_hydrochem    | 29/03/1998 | 22,343  | 89,112   | 42,65092 | 13   | 0      |
| 4_90  | BGS_hydrochem    | 29/03/1998 | 22,535  | 89,12    | 42,65092 | 13   | 0,0862 |
| 4_91  | BGS_hydrochem    | 30/03/1998 | 22,456  | 89,859   | 42,65092 | 13   | 0,0302 |
| 4_92  | BGS_hydrochem    | 01/04/1998 | 22,532  | 89,59    | 42,65092 | 13   | 0,014  |
| 4_93  | BGS_hydrochem    | 01/04/1998 | 22,469  | 89,605   | 42,65092 | 13   | 0,0041 |
| 4_94  | BGS_hydrochem    | 01/04/1998 | 22,579  | 89,665   | 45,93176 | 14   | 0,129  |
| 4_95  | BGS_hydrochem    | 30/03/1998 | 22,689  | 89,865   | 45,93176 | 14   | 0,0164 |
| 4_96  | BGS_hydrochem    | 27/03/1998 | 22,376  | 89,031   | 49,2126  | 15   | 0,0185 |
| 4_97  | BGS_hydrochem    | 01/04/1998 | 22,597  | 89,641   | 49,2126  | 15   | 0,0376 |
| 4_98  | BGS_hydrochem    | 29/03/1998 | 22,365  | 89,086   | 49,2126  | 15   | 0,509  |
| 4_99  | BGS_hydrochem    | 31/03/1998 | 22,704  | 89,688   | 49,2126  | 15   | 0,234  |
| 4_100 | BGS_hydrochem    | 25/03/1998 | 22,672  | 89,618   | 52,49344 | 16   | 0,127  |
| 4_101 | BGS_hydrochem    | 25/03/1998 | 22,751  | 89,714   | 52,49344 | 16   | 0,571  |
| 4_102 | BGS_hydrochem    | 01/04/1998 | 22,476  | 89,597   | 52,49344 | 16   | 0      |
| 4_103 | BGS_hydrochem    | 31/03/1998 | 22,722  | 89,847   | 59,05512 | 18   | 0,059  |
| 4_104 | BGS_hydrochem    | 01/04/1998 | 22,55   | 89,59    | 59,05512 | 18   | 0      |
| 4_105 | BGS_hydrochem    | 31/03/1998 | 22,902  | 89,768   | 59,05512 | 18   | 0,317  |
| 4_106 | BGS_hydrochem    | 31/03/1998 | 22,898  | 89,81    | 59,05512 | 18   | 0,128  |
| 4_107 | BGS_hydrochem    | 30/03/1998 | 22,608  | 89,844   | 59,05512 | 18   | 0,177  |
| 4_108 | BGS_hydrochem    | 31/03/1998 | 22,715  | 89,667   | 62,33596 | 19   | 0,635  |
| 4_109 | BGS_hydrochem    | 31/03/1998 | 22,86   | 89,877   | 62,33596 | 19   | 0,398  |
| 4_110 | BGS_hydrochem    | 27/03/1998 | 22,52   | 89,021   | 65,6168  | 20   | 0,1    |
| 4_111 | BGS_hydrochem    | 30/03/1998 | 22,565  | 89,845   | 65,6168  | 20   | 0,092  |
| 4_112 | BGS_hydrochem    | 31/03/1998 | 22,642  | 89,814   | 65,6168  | 20   | 0,301  |
| 4_113 | BGS_hydrochem    | 24/03/1998 | 22,823  | 89,331   | 65,6168  | 20   | 0,0396 |
| 4_114 | BGS_hydrochem    | 27/03/1998 | 22,483  | 89,011   | 65,6168  | 20   | 0,0245 |
| 4_115 | BGS_hydrochem    | 27/03/1998 | 22,435  | 89,095   | 65,6168  | 20   | 0,002  |
| 4_116 | BGS_hydrochem    | 30/03/1998 | 22,561  | 89,863   | 65,6168  | 20   | 0,0813 |
| 4_117 | BGS_hydrochem    | 30/03/1998 | 22,487  | 89,866   | 65,6168  | 20   | 0,0036 |
| 4_118 | BGS_hydrochem    | 31/03/1998 | 22,791  | 89,876   | 65,6168  | 20   | 0,134  |
| 4_119 | BGS_hydrochem    | 24/03/1998 | 22,633  | 89,52    | 68,89764 | 21   | 0      |
| 4_120 | BGS_hydrochem    | 23/03/1998 | 22,9    | 89,656   | 68,89764 | 21   | 0,0368 |

|       |               |            |        |        |          |    |        |
|-------|---------------|------------|--------|--------|----------|----|--------|
| 4_121 | BGS_hydrochem | 31/03/1998 | 22,855 | 89,819 | 68,89764 | 21 | 0,0469 |
| 4_122 | BGS_hydrochem | 30/03/1998 | 22,602 | 89,887 | 68,89764 | 21 | 0,0101 |
| 4_123 | BGS_hydrochem | 31/03/1998 | 22,803 | 89,901 | 68,89764 | 21 | 0,17   |
| 4_124 | BGS_hydrochem | 28/03/1998 | 22,75  | 89,259 | 72,17848 | 22 | 0,106  |
| 4_125 | BGS_hydrochem | 24/03/1998 | 22,617 | 89,317 | 72,17848 | 22 | 0,0087 |
| 4_126 | BGS_hydrochem | 23/03/1998 | 22,915 | 89,625 | 72,17848 | 22 | 0,0186 |
| 4_127 | BGS_hydrochem | 01/04/1998 | 22,629 | 89,61  | 72,17848 | 22 | 0,424  |
| 4_128 | BGS_hydrochem | 31/03/1998 | 22,782 | 89,877 | 72,17848 | 22 | 0,48   |
| 4_129 | BGS_hydrochem | 27/03/1998 | 22,711 | 89,107 | 75,45932 | 23 | 0,0729 |
| 4_130 | BGS_hydrochem | 25/03/1998 | 22,709 | 89,635 | 75,45932 | 23 | 0,015  |
| 4_131 | BGS_hydrochem | 31/03/1998 | 22,869 | 89,748 | 75,45932 | 23 | 0,252  |
| 4_132 | BGS_hydrochem | 01/04/1998 | 22,642 | 89,643 | 75,45932 | 23 | 0,339  |
| 4_133 | BGS_hydrochem | 30/03/1998 | 22,651 | 89,882 | 78,74016 | 24 | 0,0188 |
| 4_134 | BGS_hydrochem | 23/03/1998 | 22,87  | 89,634 | 78,74016 | 24 | 0,109  |
| 4_135 | BGS_hydrochem | 27/03/1998 | 22,392 | 89,015 | 78,74016 | 24 | 0,0154 |
| 4_136 | BGS_hydrochem | 01/04/1998 | 22,575 | 89,659 | 78,74016 | 24 | 0,148  |
| 4_137 | BGS_hydrochem | 01/04/1998 | 22,677 | 89,652 | 78,74016 | 24 | 0,472  |
| 4_138 | BGS_hydrochem | 27/03/1998 | 22,703 | 89,073 | 78,74016 | 24 | 0,0035 |
| 4_139 | BGS_hydrochem | 30/03/1998 | 22,666 | 89,876 | 78,74016 | 24 | 0,103  |
| 4_140 | BGS_hydrochem | 31/03/1998 | 22,927 | 89,81  | 82,021   | 25 | 0,103  |
| 4_141 | BGS_hydrochem | 31/03/1998 | 22,841 | 89,849 | 82,021   | 25 | 0,0969 |
| 4_142 | BGS_hydrochem | 30/03/1998 | 22,601 | 89,893 | 82,021   | 25 | 0,472  |
| 4_143 | BGS_hydrochem | 01/04/1998 | 22,664 | 89,783 | 82,021   | 25 | 0,299  |
| 4_144 | BGS_hydrochem | 31/03/1998 | 22,82  | 89,874 | 82,021   | 25 | 0,186  |
| 4_145 | BGS_hydrochem | 23/03/1998 | 22,932 | 89,668 | 85,30184 | 26 | 0,114  |
| 4_146 | BGS_hydrochem | 01/04/1998 | 22,546 | 89,652 | 85,30184 | 26 | 0,505  |
| 4_147 | BGS_hydrochem | 24/03/1998 | 22,716 | 89,581 | 85,30184 | 26 | 0,538  |
| 4_148 | BGS_hydrochem | 28/03/1998 | 22,564 | 88,981 | 85,30184 | 26 | 0,0735 |
| 4_149 | BGS_hydrochem | 31/03/1998 | 22,747 | 89,84  | 95,14436 | 29 | 0,176  |
| 4_150 | BGS_hydrochem | 31/03/1998 | 22,857 | 89,872 | 95,14436 | 29 | 0,269  |
| 4_151 | BGS_hydrochem | 30/03/1998 | 22,583 | 89,959 | 95,14436 | 29 | 0,0272 |
| 4_152 | BGS_hydrochem | 31/03/1998 | 22,663 | 89,774 | 95,14436 | 29 | 0,13   |
| 4_153 | BGS_hydrochem | 25/03/1998 | 22,8   | 89,643 | 98,4252  | 30 | 0,0395 |
| 4_154 | BGS_hydrochem | 27/03/1998 | 22,745 | 88,925 | 98,4252  | 30 | 0,262  |
| 4_155 | BGS_hydrochem | 27/03/1998 | 22,703 | 89,054 | 98,4252  | 30 | 0,227  |
| 4_156 | BGS_hydrochem | 01/04/1998 | 22,732 | 89,754 | 98,4252  | 30 | 0,0262 |
| 4_157 | BGS_hydrochem | 01/04/1998 | 22,662 | 89,798 | 98,4252  | 30 | 0,0108 |
| 4_158 | BGS_hydrochem | 25/03/1998 | 22,739 | 89,652 | 101,706  | 31 | 0,453  |
| 4_159 | BGS_hydrochem | 28/03/1998 | 22,576 | 88,965 | 101,706  | 31 | 0,0587 |
| 4_160 | BGS_hydrochem | 28/03/1998 | 22,873 | 89,084 | 101,706  | 31 | 0,181  |
| 4_161 | BGS_hydrochem | 24/03/1998 | 22,587 | 89,518 | 108,2677 | 33 | 0,0158 |
| 4_162 | BGS_hydrochem | 27/03/1998 | 22,811 | 89,038 | 111,5486 | 34 | 0,109  |
| 4_163 | BGS_hydrochem | 31/03/1998 | 22,824 | 89,748 | 111,5486 | 34 | 0,124  |
| 4_164 | BGS_hydrochem | 28/03/1998 | 22,558 | 89,007 | 114,8294 | 35 | 0,192  |
| 4_165 | BGS_hydrochem | 25/03/1998 | 22,78  | 89,726 | 118,1102 | 36 | 0,355  |
| 4_166 | BGS_hydrochem | 27/03/1998 | 22,751 | 89,02  | 118,1102 | 36 | 0,0735 |
| 4_167 | BGS_hydrochem | 28/03/1998 | 22,765 | 89,143 | 124,6719 | 38 | 0,108  |

|       |               |            |        |        |          |    |        |
|-------|---------------|------------|--------|--------|----------|----|--------|
| 4_168 | BGS_hydrochem | 25/03/1998 | 22,778 | 89,706 | 127,9528 | 39 | 0,121  |
| 4_169 | BGS_hydrochem | 28/03/1998 | 22,639 | 89,041 | 127,9528 | 39 | 0,176  |
| 4_170 | BGS_hydrochem | 28/03/1998 | 22,86  | 89,04  | 127,9528 | 39 | 0,147  |
| 4_171 | BGS_hydrochem | 26/03/1998 | 22,883 | 89,518 | 127,9528 | 39 | 0      |
| 4_172 | BGS_hydrochem | 26/03/1998 | 22,855 | 89,542 | 127,9528 | 39 | 0,039  |
| 4_173 | BGS_hydrochem | 27/03/1998 | 22,683 | 89,024 | 127,9528 | 39 | 0,0828 |
| 4_174 | BGS_hydrochem | 28/03/1998 | 22,923 | 89,096 | 127,9528 | 39 | 0,106  |
| 4_175 | BGS_hydrochem | 28/03/1998 | 22,679 | 89,256 | 127,9528 | 39 | 0,233  |
| 4_176 | BGS_hydrochem | 24/03/1998 | 22,63  | 89,515 | 131,2336 | 40 | 0      |
| 4_177 | BGS_hydrochem | 24/03/1998 | 22,576 | 89,499 | 134,5144 | 41 | 0,012  |
| 4_178 | BGS_hydrochem | 25/03/1998 | 22,71  | 89,306 | 134,5144 | 41 | 0,0883 |
| 4_179 | BGS_hydrochem | 28/03/1998 | 22,795 | 89,12  | 134,5144 | 41 | 0,319  |
| 4_180 | BGS_hydrochem | 27/03/1998 | 22,826 | 89,011 | 141,0761 | 43 | 0,501  |
| 4_181 | BGS_hydrochem | 24/03/1998 | 22,698 | 89,434 | 141,0761 | 43 | 0,0362 |
| 4_182 | BGS_hydrochem | 27/03/1998 | 22,693 | 88,985 | 141,0761 | 43 | 0,136  |
| 4_183 | BGS_hydrochem | 29/03/1998 | 22,305 | 89,11  | 141,0761 | 43 | 0,168  |
| 4_184 | BGS_hydrochem | 23/03/1998 | 22,753 | 89,419 | 144,357  | 44 | 0,0338 |
| 4_185 | BGS_hydrochem | 28/03/1998 | 22,607 | 88,999 | 144,357  | 44 | 0,221  |
| 4_186 | BGS_hydrochem | 28/03/1998 | 22,917 | 89,014 | 144,357  | 44 | 0,0925 |
| 4_187 | BGS_hydrochem | 27/03/1998 | 22,711 | 89,107 | 144,357  | 44 | 0,143  |
| 4_188 | BGS_hydrochem | 31/03/1998 | 22,763 | 89,855 | 147,6378 | 45 | 0,217  |
| 4_189 | BGS_hydrochem | 25/03/1998 | 22,659 | 89,334 | 147,6378 | 45 | 0,0039 |
| 4_190 | BGS_hydrochem | 28/03/1998 | 22,605 | 88,961 | 147,6378 | 45 | 0,315  |
| 4_191 | BGS_hydrochem | 28/03/1998 | 22,733 | 89,297 | 147,6378 | 45 | 0,0758 |
| 4_192 | BGS_hydrochem | 28/03/1998 | 22,836 | 89,011 | 150,9186 | 46 | 0,453  |
| 4_193 | BGS_hydrochem | 28/03/1998 | 22,901 | 88,949 | 150,9186 | 46 | 0,088  |
| 4_194 | BGS_hydrochem | 27/03/1998 | 22,57  | 89,076 | 150,9186 | 46 | 0,0562 |
| 4_195 | BGS_hydrochem | 29/03/1998 | 22,615 | 89,15  | 150,9186 | 46 | 0,236  |
| 4_196 | BGS_hydrochem | 28/03/1998 | 22,782 | 89,251 | 157,4803 | 48 | 0,0155 |
| 4_197 | BGS_hydrochem | 25/03/1998 | 22,576 | 89,325 | 160,7612 | 49 | 0,13   |
| 4_198 | BGS_hydrochem | 23/03/1998 | 22,984 | 89,446 | 160,7612 | 49 | 0,0973 |
| 4_199 | BGS_hydrochem | 26/03/1998 | 22,865 | 89,525 | 160,7612 | 49 | 0,0628 |
| 4_200 | BGS_hydrochem | 28/03/1998 | 22,778 | 89,205 | 160,7612 | 49 | 0,27   |
| 4_201 | BGS_hydrochem | 28/03/1998 | 22,721 | 89,207 | 160,7612 | 49 | 0,291  |
| 4_202 | BGS_hydrochem | 25/03/1998 | 22,624 | 89,304 | 164,042  | 50 | 0,097  |
| 4_203 | BGS_hydrochem | 24/03/1998 | 22,567 | 89,322 | 167,3228 | 51 | 0,068  |
| 4_204 | BGS_hydrochem | 28/03/1998 | 22,841 | 88,974 | 170,6037 | 52 | 0,328  |
| 4_205 | BGS_hydrochem | 23/03/1998 | 22,918 | 89,569 | 173,8845 | 53 | 0,0009 |
| 4_206 | BGS_hydrochem | 24/03/1998 | 22,825 | 89,274 | 173,8845 | 53 | 0,0657 |
| 4_207 | BGS_hydrochem | 23/03/1998 | 22,989 | 89,462 | 177,1654 | 54 | 0      |
| 4_208 | BGS_hydrochem | 23/03/1998 | 22,944 | 89,478 | 177,1654 | 54 | 0      |
| 4_209 | BGS_hydrochem | 23/03/1998 | 22,912 | 89,499 | 177,1654 | 54 | 0      |
| 4_210 | BGS_hydrochem | 24/03/1998 | 22,689 | 89,571 | 177,1654 | 54 | 0      |
| 4_211 | BGS_hydrochem | 25/03/1998 | 22,84  | 89,559 | 177,1654 | 54 | 0      |
| 4_212 | BGS_hydrochem | 24/03/1998 | 22,861 | 89,422 | 177,1654 | 54 | 0,0011 |
| 4_213 | BGS_hydrochem | 26/03/1998 | 22,862 | 89,542 | 177,1654 | 54 | 0,0017 |
| 4_214 | BGS_hydrochem | 23/03/1998 | 22,981 | 89,456 | 180,4462 | 55 | 0      |

|       |                   |            |          |          |          |        |          |
|-------|-------------------|------------|----------|----------|----------|--------|----------|
| 4_215 | BGS_hydrochem     | 23/03/1998 | 22,887   | 89,535   | 180,4462 | 55     | 0,168    |
| 4_216 | BGS_hydrochem     | 29/03/1998 | 22,504   | 89,199   | 180,4462 | 55     | 0,33     |
| 4_217 | BGS_hydrochem     | 29/03/1998 | 22,538   | 89,24    | 183,727  | 56     | 0,155    |
| 4_218 | BGS_hydrochem     | 23/03/1998 | 22,862   | 89,556   | 183,727  | 56     | 0        |
| 4_219 | BGS_hydrochem     | 23/03/1998 | 22,819   | 89,421   | 193,5696 | 59     | 0        |
| 4_220 | BGS_hydrochem     | 23/03/1998 | 22,959   | 89,556   | 193,5696 | 59     | 0        |
| 4_221 | BGS_hydrochem     | 29/03/1998 | 22,414   | 89,217   | 193,5696 | 59     | 0,261    |
| 4_222 | BGS_hydrochem     | 23/03/1998 | 22,871   | 89,508   | 196,8504 | 60     | 0,073    |
| 4_223 | BGS_hydrochem     | 23/03/1998 | 22,896   | 89,508   | 200,1312 | 61     | 0,0394   |
| 4_224 | BGS_hydrochem     | 25/03/1998 | 22,826   | 89,575   | 203,4121 | 62     | 0,137    |
| 4_225 | BGS_hydrochem     | 26/03/1998 | 22,862   | 89,525   | 213,2546 | 65     | 0        |
| 4_226 | BGS_hydrochem     | 25/03/1998 | 22,83    | 89,606   | 219,8163 | 67     | 0,0187   |
| 4_227 | BGS_hydrochem     | 25/03/1998 | 22,812   | 89,645   | 226,378  | 69     | 0,0559   |
| 4_228 | BGS_hydrochem     | 26/03/1998 | 22,889   | 89,506   | 226,378  | 69     | 0,003    |
| 4_229 | BGS_hydrochem     | 23/03/1998 | 22,887   | 89,6     | 232,9396 | 71     | 0        |
| 4_230 | BGS_hydrochem     | 26/03/1998 | 22,816   | 89,567   | 242,7822 | 74     | 0,0468   |
| 4_231 | BGS_hydrochem     | 26/03/1998 | 22,837   | 89,531   | 242,7822 | 74     | 0        |
| 4_232 | BGS_hydrochem     | 25/03/1998 | 22,797   | 89,589   | 246,063  | 75     | 0,0874   |
| 4_233 | BGS_hydrochem     | 23/03/1998 | 22,969   | 89,477   | 252,6247 | 77     | 0,259    |
| 4_234 | BGS_hydrochem     | 26/03/1998 | 22,864   | 89,532   | 298,5564 | 91     | 0        |
| 4_235 | BGS_hydrochem     | 26/03/1998 | 22,865   | 89,545   | 301,8373 | 92     | 0        |
| 4_236 | BGS_hydrochem     | 27/03/1998 | 22,751   | 88,941   | 301,8373 | 92     | 0,266    |
| 4_237 | BWDB_WetSeason    | 07.11.2012 | 22,73782 | 89,51816 | 180,4462 | 55     | 0        |
| 4_238 | BWDB_WetSeason    | 28.11.2012 | 22,47203 | 89,60347 | 282,1522 | 86     | 0,0075   |
| 4_239 | BWDB_WetSeason    | 28.11.2012 | 22,46842 | 89,61763 | 282,1522 | 86     | 0,0075   |
| 4_240 | BWDB_WetSeason    | 28.11.2012 | 22,46795 | 89,61987 | 282,1522 | 86     | 0        |
| 4_241 | BWDB_WetSeason    | 28.11.2012 | 22,92949 | 89,80759 | 282,1522 | 86     | 0,0075   |
| 4_242 | BWDB_WetSeason    | 28.11.2012 | 22,46748 | 89,60719 | 285,4331 | 87     | 0,0075   |
| 4_243 | BWDB_WetSeason    | 28.11.2012 | 22,46704 | 89,6171  | 291,9948 | 89     | 0,0075   |
| 4_244 | BWDB_WetSeason    | 29.11.2012 | 22,48948 | 89,86292 | 301,8373 | 92     | 0,0075   |
| 4_245 | BWDB_WetSeason    | 07.11.2012 | 22,73646 | 89,51288 | 301,8373 | 92     | 0,0275   |
| 4_246 | BWDB_WetSeason    | 29.11.2012 | 22,4585  | 89,86106 | 311,6798 | 95     | 0,0075   |
| 4_247 | BWDB_WetSeason    | 27.11.2012 | 22,64251 | 89,80753 | 321,5223 | 98     | 0,0075   |
| 4_248 | BWDB_WetSeason    | 27.11.2012 | 22,64183 | 89,81519 | 321,5223 | 98     | 0,0075   |
| 4_249 | BWDB_WetSeason    | 27.11.2012 | 22,63759 | 89,82016 | 321,5223 | 98     | 0,0075   |
| 4_250 | BWDB_WetSeason    | 27.11.2012 | 22,63409 | 89,82232 | 321,5223 | 98     | 0,0075   |
| 4_251 | BWDB_WetSeason    | 27.11.2012 | 22,62876 | 89,82458 | 321,5223 | 98     | 0        |
| 4_252 | Fieldwork_Jan2017 | 30/01/2017 | 22,53494 | 89,15172 |          | 6,096  | 0,0241   |
| 4_253 | Fieldwork_Jan2017 | 25/07/2017 | 22,52646 | 89,14548 |          | 6,4008 | 0,005206 |
| 4_254 | Fieldwork_Jan2017 | 25/07/2017 | 22,52912 | 89,14765 |          | 7,0104 | 0,0575   |
| 4_255 | Fieldwork_Jan2017 |            | 22,67959 | 89,50458 |          | 7,62   | 0,0213   |
| 4_256 | Fieldwork_Jan2017 |            | 22,54176 | 89,15205 |          | 7,62   | 0,0096   |
| 4_257 | Fieldwork_Jan2017 | 04/02/2017 | 22,53920 | 89,15164 |          | 7,62   | 0,0082   |
| 4_258 | Fieldwork_Jan2017 | 19/01/2017 | 22,53916 | 89,15051 |          | 7,62   | 0,0077   |
| 4_259 | Fieldwork_Jan2017 | 24/07/2017 | 22,53557 | 89,1601  |          | 7,9248 | 0,000741 |
| 4_260 | Fieldwork_Jan2017 |            | 22,53270 | 89,15093 |          | 9,144  | 0,0967   |
| 4_261 | Fieldwork_Jan2017 | 03/02/2017 | 22,53733 | 89,15202 |          | 9,144  | 0,064    |

|       |                   |            |          |          |         |        |
|-------|-------------------|------------|----------|----------|---------|--------|
| 4_262 | Fieldwork_Jan2017 | 30/01/2017 | 22,53695 | 89,15234 | 9,144   | 0,0505 |
| 4_263 | Fieldwork_Jan2017 | 30/01/2017 | 22,53832 | 89,15229 | 9,144   | 0,0355 |
| 4_264 | Fieldwork_Jan2017 | 01/08/2017 | 22,67963 | 89,50446 | 9,144   | 0,0032 |
| 4_265 | Fieldwork_Jan2017 | 19/01/2017 | 22,54058 | 89,15069 | 10,668  | 0,1776 |
| 4_266 | Fieldwork_Jan2017 | 17/01/2017 | 22,54194 | 89,15792 | 10,668  | 0,0016 |
| 4_267 | Fieldwork_Jan2017 | 24/01/2017 | 22,53615 | 89,15279 | 10,668  | 0,0449 |
| 4_268 | Fieldwork_Jan2017 | 30/01/2017 | 22,54009 | 89,15189 | 10,668  | 0,042  |
| 4_269 | Fieldwork_Jan2017 | 24/01/2017 | 22,53473 | 89,15146 | 10,668  | 0,0247 |
| 4_270 | Fieldwork_Jan2017 | 06/08/2017 | 22,68108 | 89,50499 | 10,668  | 0,0016 |
| 4_271 | Fieldwork_Jan2017 | 10/08/2017 | 22,67786 | 89,5048  | 11,2776 | 0,0059 |
| 4_272 | Fieldwork_Jan2017 | 30/01/2017 | 22,54372 | 89,15282 | 12,192  | 0,0294 |
| 4_273 | Fieldwork_Jan2017 | 24/01/2017 | 22,53782 | 89,15210 | 12,192  | 0,0178 |
| 4_274 | Fieldwork_Jan2017 |            | 22,54623 | 89,15291 | 12,192  | 0,0161 |
| 4_275 | Fieldwork_Jan2017 | 16/01/2017 | 22,54240 | 89,15351 | 12,192  | 0,0113 |
| 4_276 | Fieldwork_Jan2017 | 24/01/2017 | 22,53797 | 89,15264 | 12,192  | 0,0089 |
| 4_277 | Fieldwork_Jan2017 | 19/01/2017 | 22,54033 | 89,15104 | 12,192  | 0,0066 |
| 4_278 | Fieldwork_Jan2017 |            | 22,54483 | 89,15273 | 12,192  | 0,0058 |
| 4_279 | Fieldwork_Jan2017 | 09/01/2017 | 22,67950 | 89,50346 | 12,192  | 0,0034 |
| 4_280 | Fieldwork_Jan2017 | 16/01/2017 | 22,54231 | 89,15352 | 12,192  | 0,0029 |
| 4_281 | Fieldwork_Jan2017 | 16/01/2017 | 22,54212 | 89,15335 | 12,192  | 0,0013 |
| 4_282 | Fieldwork_Jan2017 | 02/08/2017 | 22,67963 | 89,50446 | 12,192  | 0,0009 |
| 4_283 | Fieldwork_Jan2017 | 09/01/2017 | 22,67920 | 89,50225 | 12,192  | 0,0003 |
| 4_284 | Fieldwork_Jan2017 | 19/01/2017 | 22,54060 | 89,15060 | 12,8016 | 0,0052 |
| 4_285 | Fieldwork_Jan2017 | 09/01/2017 | 22,67893 | 89,50028 | 12,8016 | 0,0051 |
| 4_286 | Fieldwork_Jan2017 | 16/01/2017 | 22,54215 | 89,15298 | 13,1064 | 0,0024 |
| 4_287 | Fieldwork_Jan2017 | 19/01/2017 | 22,54117 | 89,15275 | 13,716  | 0,2438 |
| 4_288 | Fieldwork_Jan2017 | 19/01/2017 | 22,53929 | 89,15017 | 13,716  | 0,0576 |
| 4_289 | Fieldwork_Jan2017 | 16/01/2017 | 22,54391 | 89,15248 | 13,716  | 0,0321 |
| 4_290 | Fieldwork_Jan2017 | 16/01/2017 | 22,54279 | 89,15235 | 13,716  | 0,0255 |
| 4_291 | Fieldwork_Jan2017 | 16/01/2017 | 22,54320 | 89,15227 | 13,716  | 0,0207 |
| 4_292 | Fieldwork_Jan2017 | 16/01/2017 | 22,54506 | 89,15258 | 13,716  | 0,0041 |
| 4_293 | Fieldwork_Jan2017 | 16/01/2017 | 22,54221 | 89,15280 | 13,716  | 0,0029 |
| 4_294 | Fieldwork_Jan2017 | 09/01/2017 | 22,67917 | 89,50054 | 13,716  | 0,0022 |
| 4_295 | Fieldwork_Jan2017 | 16/01/2017 | 22,54204 | 89,15265 | 13,716  | 0,0022 |
| 4_296 | Fieldwork_Jan2017 | 16/01/2017 | 22,54490 | 89,15280 | 13,716  | 0,0008 |
| 4_297 | Fieldwork_Jan2017 |            | 22,53270 | 89,15093 | 13,716  | 0,177  |
| 4_298 | Fieldwork_Jan2017 | 24/01/2017 | 22,53712 | 89,15256 | 13,716  | 0,0929 |
| 4_299 | Fieldwork_Jan2017 | 24/01/2017 | 22,53334 | 89,15147 | 13,716  | 0,0698 |
| 4_300 | Fieldwork_Jan2017 | 03/02/2017 | 22,54278 | 89,15324 | 13,716  | 0,0433 |
| 4_301 | Fieldwork_Jan2017 | 30/01/2017 | 22,54006 | 89,15188 | 13,716  | 0,0373 |
| 4_302 | Fieldwork_Jan2017 | 03/02/2017 | 22,53701 | 89,15179 | 13,716  | 0,034  |
| 4_303 | Fieldwork_Jan2017 | 30/01/2017 | 22,53934 | 89,15168 | 13,716  | 0,0327 |
| 4_304 | Fieldwork_Jan2017 | 24/01/2017 | 22,53599 | 89,15218 | 13,716  | 0,0267 |
| 4_305 | Fieldwork_Jan2017 | 24/01/2017 | 22,53672 | 89,15280 | 13,716  | 0,0148 |
| 4_306 | Fieldwork_Jan2017 | 01/02/2017 | 22,54207 | 89,15207 | 13,716  | 0,0086 |
| 4_307 | Fieldwork_Jan2017 |            | 22,54536 | 89,15277 | 13,716  | 0,0072 |
| 4_308 | Fieldwork_Jan2017 | 21/01/2017 | 22,67914 | 89,50466 | 13,716  | 0,0051 |

|       |                   |            |          |          |         |          |
|-------|-------------------|------------|----------|----------|---------|----------|
| 4_309 | Fieldwork_Jan2017 | 03/02/2017 | 22,53949 | 89,15131 | 13,716  | 0,0044   |
| 4_310 | Fieldwork_Jan2017 | 21/01/2017 | 22,67973 | 89,50495 | 13,716  | 0,0031   |
| 4_311 | Fieldwork_Jan2017 | 21/01/2017 | 22,67952 | 89,50623 | 13,716  | 0,0011   |
| 4_312 | Fieldwork_Jan2017 | 04/02/2017 | 22,53144 | 89,15012 | 15,24   | 0,0795   |
| 4_313 | Fieldwork_Jan2017 | 24/01/2017 | 22,53734 | 89,15256 | 15,24   | 0,0774   |
| 4_314 | Fieldwork_Jan2017 | 16/01/2017 | 22,54185 | 89,15329 | 15,24   | 0,03     |
| 4_315 | Fieldwork_Jan2017 | 16/01/2017 | 22,54480 | 89,15266 | 15,24   | 0,0206   |
| 4_316 | Fieldwork_Jan2017 | 21/01/2017 | 22,67989 | 89,50422 | 15,24   | 0,0023   |
| 4_317 | Fieldwork_Jan2017 | 19/01/2017 | 22,53931 | 89,15005 | 15,24   | 0,0022   |
| 4_318 | Fieldwork_Jan2017 | 21/01/2017 | 22,67969 | 89,50839 | 15,8496 | 0,0087   |
| 4_319 | Fieldwork_Jan2017 | 19/01/2017 | 22,54116 | 89,15176 | 16,764  | 0,2416   |
| 4_320 | Fieldwork_Jan2017 | 03/02/2017 | 22,54011 | 89,15205 | 16,764  | 0,0646   |
| 4_321 | Fieldwork_Jan2017 | 03/02/2017 | 22,53924 | 89,15277 | 16,764  | 0,0513   |
| 4_322 | Fieldwork_Jan2017 | 16/01/2017 | 22,54376 | 89,15289 | 16,764  | 0,0473   |
| 4_323 | Fieldwork_Jan2017 | 24/01/2017 | 22,53384 | 89,15232 | 16,764  | 0,0404   |
| 4_324 | Fieldwork_Jan2017 | 16/01/2017 | 22,54196 | 89,15231 | 16,764  | 0,0245   |
| 4_325 | Fieldwork_Jan2017 | 16/01/2017 | 22,54489 | 89,15298 | 16,764  | 0,0151   |
| 4_326 | Fieldwork_Jan2017 | 16/01/2017 | 22,54319 | 89,15158 | 16,764  | 0,0132   |
| 4_327 | Fieldwork_Jan2017 | 16/01/2017 | 22,54795 | 89,15238 | 16,764  | 0,0107   |
| 4_328 | Fieldwork_Jan2017 | 24/01/2017 | 22,53510 | 89,15148 | 16,764  | 0,0082   |
| 4_329 | Fieldwork_Jan2017 | 21/01/2017 | 22,67945 | 89,50596 | 16,764  | 0,0079   |
| 4_330 | Fieldwork_Jan2017 | 09/01/2017 | 22,67833 | 89,49965 | 16,764  | 0,0036   |
| 4_331 | Fieldwork_Jan2017 | 16/01/2017 | 22,54769 | 89,15131 | 16,764  | 0,0031   |
| 4_332 | Fieldwork_Jan2017 | 03/02/2017 | 22,54292 | 89,15282 | 16,764  | 0,0025   |
| 4_333 | Fieldwork_Jan2017 | 09/01/2017 | 22,67862 | 89,49973 | 16,764  | 0,0024   |
| 4_334 | Fieldwork_Jan2017 | 07/08/2017 | 22,68108 | 89,50499 | 16,764  | 0,0012   |
| 4_335 | Fieldwork_Jan2017 | 09/01/2017 | 22,67872 | 89,50212 | 16,764  | 0,0008   |
| 4_336 | Fieldwork_Jan2017 | 21/01/2017 | 22,67985 | 89,50633 | 17,3736 | 0,007    |
| 4_337 | Fieldwork_Jan2017 | 23/07/2017 | 22,55072 | 89,1534  | 17,3736 | 0,001699 |
| 4_338 | Fieldwork_Jan2017 | 21/01/2017 | 22,67984 | 89,50521 | 17,3736 | 0,0008   |
| 4_339 | Fieldwork_Jan2017 | 03/02/2017 | 22,53470 | 89,15234 | 18,288  | 0,057    |
| 4_340 | Fieldwork_Jan2017 | 24/01/2017 | 22,53496 | 89,15238 | 18,288  | 0,0246   |
| 4_341 | Fieldwork_Jan2017 | 17/01/2017 | 22,54273 | 89,15442 | 18,288  | 0,0233   |
| 4_342 | Fieldwork_Jan2017 | 19/01/2017 | 22,54129 | 89,15238 | 18,288  | 0,0045   |
| 4_343 | Fieldwork_Jan2017 | 17/01/2017 | 22,54297 | 89,15025 | 18,288  | 0,0023   |
| 4_344 | Fieldwork_Jan2017 | 16/01/2017 | 22,54515 | 89,15288 | 19,812  | 0,0435   |
| 4_345 | Fieldwork_Jan2017 | 03/02/2017 | 22,54295 | 89,15268 | 19,812  | 0,0424   |
| 4_346 | Fieldwork_Jan2017 | 16/01/2017 | 22,54387 | 89,15315 | 19,812  | 0,0239   |
| 4_347 | Fieldwork_Jan2017 | 24/01/2017 | 22,53280 | 89,15138 | 19,812  | 0,0159   |
| 4_348 | Fieldwork_Jan2017 | 07/02/2017 | 22,61818 | 89,42756 | 19,812  | 0,0058   |
| 4_349 | Fieldwork_Jan2017 | 21/01/2017 | 22,68000 | 89,50448 | 19,812  | 0,0034   |
| 4_350 | Fieldwork_Jan2017 | 19/01/2017 | 22,53994 | 89,15026 | 21,336  | 0,0835   |
| 4_351 | Fieldwork_Jan2017 | 17/01/2017 | 22,54211 | 89,15623 | 21,336  | 0,0034   |
| 4_352 | Fieldwork_Jan2017 | 16/01/2017 | 22,54573 | 89,15205 | 21,336  | 0,0033   |
| 4_353 | Fieldwork_Jan2017 | 07/02/2017 | 22,62019 | 89,42468 | 21,336  | 0,0019   |
| 4_354 | Fieldwork_Jan2017 | 21/01/2017 | 22,67957 | 89,50404 | 21,9456 | 0,0017   |
| 4_355 | Fieldwork_Jan2017 | 24/01/2017 | 22,53204 | 89,15347 | 22,86   | 0,1615   |



|       |                   |            |          |          |         |        |
|-------|-------------------|------------|----------|----------|---------|--------|
| 4_356 | Fieldwork_Jan2017 |            | 22,53494 | 89,15172 | 22,86   | 0,0673 |
| 4_357 | Fieldwork_Jan2017 | 16/01/2017 | 22,54432 | 89,15267 | 22,86   | 0,0435 |
| 4_358 | Fieldwork_Jan2017 | 24/01/2017 | 22,53622 | 89,15303 | 22,86   | 0,0294 |
| 4_359 | Fieldwork_Jan2017 | 11/08/2017 | 22,67786 | 89,5048  | 23,7744 | 0,0012 |
| 4_360 | Fieldwork_Jan2017 |            | 22,53875 | 89,15211 | 24,384  | 0,1252 |
| 4_361 | Fieldwork_Jan2017 |            | 22,54176 | 89,15205 | 24,384  | 0,0696 |
| 4_362 | Fieldwork_Jan2017 | 04/02/2017 | 22,53920 | 89,15164 | 24,384  | 0,0629 |
| 4_363 | Fieldwork_Jan2017 | 24/01/2017 | 22,53329 | 89,14887 | 24,384  | 0,0285 |
| 4_364 | Fieldwork_Jan2017 |            | 22,54623 | 89,15291 | 24,384  | 0,0271 |
| 4_365 | Fieldwork_Jan2017 | 09/01/2017 | 22,67868 | 89,49828 | 24,384  | 0,009  |
| 4_366 | Fieldwork_Jan2017 | 09/01/2017 | 22,67666 | 89,49421 | 24,384  | 0,0048 |
| 4_367 | Fieldwork_Jan2017 |            | 22,54483 | 89,15273 | 24,384  | 0,0043 |
| 4_368 | Fieldwork_Jan2017 | 03/02/2017 | 22,54176 | 89,15226 | 25,908  | 0,0372 |
| 4_369 | Fieldwork_Jan2017 | 07/02/2017 | 22,61818 | 89,42756 | 27,432  | 0,0106 |
| 4_370 | Fieldwork_Jan2017 | 07/02/2017 | 22,61898 | 89,42655 | 27,432  | 0,0072 |
| 4_371 | Fieldwork_Jan2017 | 07/02/2017 | 22,62019 | 89,42468 | 30,48   | 0,0044 |
| 4_372 | Fieldwork_Jan2017 | 22/01/2017 | 22,62003 | 89,42494 | 30,48   | 0,0002 |
| 4_373 | Fieldwork_Jan2017 | 07/02/2017 | 22,61898 | 89,42655 | 33,528  | 0,0055 |
| 4_374 | Fieldwork_Jan2017 | 31/01/2017 | 22,54430 | 89,15255 | 33,528  | 0,0047 |
| 4_375 | Fieldwork_Jan2017 | 09/01/2017 | 22,68892 | 89,46044 | 35,052  | 0,2463 |
| 4_376 | Fieldwork_Jan2017 | 04/02/2017 | 22,55824 | 89,17171 | 36,576  | 0,2346 |
| 4_377 | Fieldwork_Jan2017 | 04/02/2017 | 22,53920 | 89,15164 | 36,576  | 0,1213 |
| 4_378 | Fieldwork_Jan2017 |            | 22,53875 | 89,15211 | 36,576  | 0,1158 |
| 4_379 | Fieldwork_Jan2017 |            | 22,54176 | 89,15205 | 36,576  | 0,0862 |
| 4_380 | Fieldwork_Jan2017 |            | 22,54483 | 89,15273 | 36,576  | 0,0787 |
| 4_381 | Fieldwork_Jan2017 | 23/01/2017 | 22,62205 | 89,42704 | 36,576  | 0,0159 |
| 4_382 | Fieldwork_Jan2017 | 23/01/2017 | 22,62034 | 89,42836 | 36,576  | 0,0113 |
| 4_383 | Fieldwork_Jan2017 | 07/02/2017 | 22,62065 | 89,42347 | 36,576  | 0,0104 |
| 4_384 | Fieldwork_Jan2017 |            | 22,54623 | 89,15291 | 36,576  | 0,0085 |
| 4_385 | Fieldwork_Jan2017 | 23/01/2017 | 22,62103 | 89,42722 | 36,576  | 0,0025 |
| 4_386 | Fieldwork_Jan2017 | 22/01/2017 | 22,61920 | 89,42439 | 37,1856 | 0,0025 |
| 4_387 | Fieldwork_Jan2017 | 25/07/2017 | 22,51469 | 89,13312 | 37,4904 | 0,3265 |
| 4_388 | Fieldwork_Jan2017 | 07/02/2017 | 22,61818 | 89,42756 | 38,1    | 0,0172 |
| 4_389 | Fieldwork_Jan2017 | 22/01/2017 | 22,61716 | 89,42339 | 38,1    | 0,0146 |
| 4_390 | Fieldwork_Jan2017 | 22/01/2017 | 22,62487 | 89,42415 | 38,1    | 0,0042 |
| 4_391 | Fieldwork_Jan2017 | 23/01/2017 | 22,62061 | 89,42647 | 38,1    | 0,0013 |
| 4_392 | Fieldwork_Jan2017 | 12/08/2017 | 22,67786 | 89,5048  | 39,624  | 0,45   |
| 4_393 | Fieldwork_Jan2017 | 03/08/2017 | 22,67963 | 89,50446 | 39,624  | 0,44   |
| 4_394 | Fieldwork_Jan2017 | 08/08/2017 | 22,68108 | 89,50499 | 39,624  | 0,37   |
| 4_395 | Fieldwork_Jan2017 | 22/01/2017 | 22,61880 | 89,42449 | 39,624  | 0,0172 |
| 4_396 | Fieldwork_Jan2017 | 25/07/2017 | 22,55809 | 89,16199 | 40,2336 | 0,3046 |
| 4_397 | Fieldwork_Jan2017 | 22/01/2017 | 22,61707 | 89,42237 | 41,148  | 0,0352 |
| 4_398 | Fieldwork_Jan2017 | 22/01/2017 | 22,62718 | 89,42325 | 41,148  | 0,0245 |
| 4_399 | Fieldwork_Jan2017 | 22/01/2017 | 22,61879 | 89,42544 | 41,148  | 0,0064 |
| 4_400 | Fieldwork_Jan2017 | 23/01/2017 | 22,62132 | 89,42653 | 41,148  | 0,0009 |
| 4_401 | Fieldwork_Jan2017 | 04/02/2017 | 22,55813 | 89,17155 | 42,672  | 0,5565 |
| 4_402 | Fieldwork_Jan2017 | 21/01/2017 | 22,67749 | 89,50382 | 42,672  | 0,3323 |

|       |                   |            |          |          |         |        |
|-------|-------------------|------------|----------|----------|---------|--------|
| 4_403 | Fieldwork_Jan2017 | 07/02/2017 | 22,62019 | 89,42468 | 42,672  | 0,0478 |
| 4_404 | Fieldwork_Jan2017 | 22/01/2017 | 22,61802 | 89,42300 | 42,672  | 0,0236 |
| 4_405 | Fieldwork_Jan2017 | 22/01/2017 | 22,61841 | 89,42414 | 42,672  | 0,0211 |
| 4_406 | Fieldwork_Jan2017 | 22/01/2017 | 22,61704 | 89,42360 | 42,672  | 0,0081 |
| 4_407 | Fieldwork_Jan2017 | 23/01/2017 | 22,62204 | 89,42776 | 42,672  | 0,0071 |
| 4_408 | Fieldwork_Jan2017 | 23/01/2017 | 22,62180 | 89,42607 | 42,672  | 0,0006 |
| 4_409 | Fieldwork_Jan2017 | 22/01/2017 | 22,61660 | 89,42210 | 44,196  | 0,0559 |
| 4_410 | Fieldwork_Jan2017 | 22/01/2017 | 22,61948 | 89,42494 | 44,196  | 0,014  |
| 4_411 | Fieldwork_Jan2017 | 22/01/2017 | 22,61824 | 89,42527 | 44,196  | 0,0094 |
| 4_412 | Fieldwork_Jan2017 |            | 22,54536 | 89,15277 | 45,72   | 0,0625 |
| 4_413 | Fieldwork_Jan2017 | 23/01/2017 | 22,62101 | 89,42530 | 45,72   | 0,037  |
| 4_414 | Fieldwork_Jan2017 | 22/01/2017 | 22,62725 | 89,42256 | 45,72   | 0,0354 |
| 4_415 | Fieldwork_Jan2017 | 07/02/2017 | 22,61898 | 89,42655 | 45,72   | 0,0288 |
| 4_416 | Fieldwork_Jan2017 | 23/01/2017 | 22,62141 | 89,42626 | 45,72   | 0,0038 |
| 4_417 | Fieldwork_Jan2017 | 23/01/2017 | 22,62106 | 89,42593 | 45,72   | 0,0018 |
| 4_418 | Fieldwork_Jan2017 | 22/01/2017 | 22,61746 | 89,42468 | 47,244  | 0,015  |
| 4_419 | Fieldwork_Jan2017 | 23/01/2017 | 22,62067 | 89,42581 | 48,768  | 0,0367 |
| 4_420 | Fieldwork_Jan2017 | 22/01/2017 | 22,62566 | 89,42553 | 48,768  | 0,0204 |
| 4_421 | Fieldwork_Jan2017 | 22/01/2017 | 22,61782 | 89,42511 | 48,768  | 0,0112 |
| 4_422 | Fieldwork_Jan2017 | 22/01/2017 | 22,62750 | 89,42248 | 50,292  | 0,0333 |
| 4_423 | Fieldwork_Jan2017 | 22/01/2017 | 22,62642 | 89,42423 | 50,292  | 0,0169 |
| 4_424 | Fieldwork_Jan2018 | 27.1.18    | 22,33051 | 89,11268 | 6,096   | 0,0072 |
| 4_425 | Fieldwork_Jan2018 | 21.1.18    | 22,33088 | 89,1113  | 6,7056  | 0,018  |
| 4_426 | Fieldwork_Jan2018 | 29.1.18    | 22,45466 | 89,08008 | 7,62    | 0,0146 |
| 4_427 | Fieldwork_Jan2018 | 21.1.18    | 22,32644 | 89,11068 | 8,2296  | 0,0106 |
| 4_428 | Fieldwork_Jan2018 | 29.1.18    | 22,45459 | 89,08163 | 9,144   | 0,0612 |
| 4_429 | Fieldwork_Jan2018 | 25.1.18    | 22,3309  | 89,1121  | 9,144   | 0,0188 |
| 4_430 | Fieldwork_Jan2018 | 21.1.18    | 22,32689 | 89,11034 | 9,144   | 0,01   |
| 4_431 | Fieldwork_Jan2018 | 6.2.18     | 22,4973  | 89,33805 | 9,144   | 0,0032 |
| 4_432 | Fieldwork_Jan2018 | 21.1.18    | 22,33031 | 89,10981 | 9,144   | 0,0008 |
| 4_433 | Fieldwork_Jan2018 | 27.1.18    | 22,33386 | 89,12388 | 11,5824 | 0,0014 |
| 4_434 | Fieldwork_Jan2018 | 20.1.18    | 22,45341 | 89,08117 | 12,192  | 0,0257 |
| 4_435 | Fieldwork_Jan2018 | 8.2.18     | 22,60256 | 89,52014 | 13,716  | 0,0968 |
| 4_436 | Fieldwork_Jan2018 | 22.1.18    | 22,65993 | 89,08893 | 13,716  | 0,0523 |
| 4_437 | Fieldwork_Jan2018 | 17.1.18    | 22,5736  | 89,13577 | 13,716  | 0,0095 |
| 4_438 | Fieldwork_Jan2018 | 24.1.18    | 22,45165 | 89,15688 | 15,24   | 0,14   |
| 4_439 | Fieldwork_Jan2018 | 20.1.18    | 22,45154 | 89,08037 | 15,24   | 0,0765 |
| 4_440 | Fieldwork_Jan2018 | 24.1.18    | 22,45057 | 89,15682 | 15,24   | 0,0392 |
| 4_441 | Fieldwork_Jan2018 | 24.1.18    | 22,45191 | 89,15644 | 15,24   | 0,0221 |
| 4_442 | Fieldwork_Jan2018 | 18.1.18    | 22,56942 | 89,12668 | 15,24   | 0,0179 |
| 4_443 | Fieldwork_Jan2018 | 17.1.18    | 22,57181 | 89,13737 | 15,24   | 0,0158 |
| 4_444 | Fieldwork_Jan2018 | 8.2.18     | 22,60634 | 89,5238  | 16,764  | 0,0033 |
| 4_445 | Fieldwork_Jan2018 | 5.2.18     | 22,49731 | 89,32909 | 16,764  | 0,0031 |
| 4_446 | Fieldwork_Jan2018 | 5.2.18     | 22,49542 | 89,31049 | 16,764  | 0,0027 |
| 4_447 | Fieldwork_Jan2018 | 8.2.18     | 22,60709 | 89,50826 | 16,764  | 0,0016 |
| 4_448 | Fieldwork_Jan2018 | 20.1.18    | 22,45523 | 89,08024 | 18,288  | 0,14   |
| 4_449 | Fieldwork_Jan2018 | 22.1.18    | 22,65975 | 89,08621 | 18,288  | 0,1099 |

|       |                   |         |          |          |         |          |
|-------|-------------------|---------|----------|----------|---------|----------|
| 4_450 | Fieldwork_Jan2018 | 29.1.18 | 22,4528  | 89,08183 | 18,288  | 0,0888   |
| 4_451 | Fieldwork_Jan2018 | 5.2.18  | 22,49879 | 89,32875 | 18,288  | 0,0041   |
| 4_452 | Fieldwork_Jan2018 | 6.2.18  | 22,49633 | 89,33788 | 19,812  | 0,0043   |
| 4_453 | Fieldwork_Jan2018 | 20.1.18 | 22,44632 | 89,07598 | 21,336  | 0,1702   |
| 4_454 | Fieldwork_Jan2018 | 20.1.18 | 22,44335 | 89,07512 | 21,336  | 0,14     |
| 4_455 | Fieldwork_Jan2018 | 22.1.18 | 22,66026 | 89,08484 | 21,336  | 0,0779   |
| 4_456 | Fieldwork_Jan2018 | 5.2.18  | 22,49288 | 89,31186 | 21,336  | 0,05     |
| 4_457 | Fieldwork_Jan2018 | 20.1.18 | 22,45021 | 89,07904 | 21,336  | 0,0234   |
| 4_458 | Fieldwork_Jan2018 | 17.1.18 | 22,5736  | 89,13654 | 21,336  | 0,0071   |
| 4_459 | Fieldwork_Jan2018 | 23.1.18 | 22,57033 | 89,1326  | 21,336  | 0,0043   |
| 4_460 | Fieldwork_Jan2018 | 8.2.18  | 22,60759 | 89,50545 | 21,336  | 0,0037   |
| 4_461 | Fieldwork_Jan2018 |         | 22,5303  | 89,17866 | 21,336  | 0,0022   |
| 4_462 | Fieldwork_Jan2018 | 5.2.18  | 22,49785 | 89,32845 | 21,336  | 0,0009   |
| 4_463 | Fieldwork_Jan2018 | 22.1.18 | 22,66002 | 89,08813 | 22,86   | 0,0629   |
| 4_464 | Fieldwork_Jan2018 | 8.2.18  | 22,60772 | 89,50106 | 22,86   | 0,0395   |
| 4_465 | Fieldwork_Jan2018 | 5.2.18  | 22,49529 | 89,31025 | 22,86   | 0,0319   |
| 4_466 | Fieldwork_Jan2018 | 22.1.18 | 22,662   | 89,08022 | 24,384  | 0,13     |
| 4_467 | Fieldwork_Jan2018 | 18.1.18 | 22,56779 | 89,12935 | 24,384  | 0,12     |
| 4_468 | Fieldwork_Jan2018 | 22.1.18 | 22,66048 | 89,08335 | 24,384  | 0,0563   |
| 4_469 | Fieldwork_Jan2018 | 8.2.18  | 22,60604 | 89,51994 | 24,384  | 0,044    |
| 4_470 | Fieldwork_Jan2018 | 5.2.18  | 22,49825 | 89,31698 | 24,384  | 0,0205   |
| 4_471 | Fieldwork_Jan2018 | 6.2.18  | 22,49462 | 89,34148 | 24,384  | 0,0108   |
| 4_472 | Fieldwork_Jan2018 | 4.2.18  | 22,63953 | 89,31687 | 25,908  | 0,5      |
| 4_473 | Fieldwork_Jan2018 | 4.2.18  | 22,63979 | 89,3189  | 25,908  | 0,47     |
| 4_474 | Fieldwork_Jan2018 | 29.1.18 | 22,45223 | 89,08108 | 25,908  | 0,23     |
| 4_475 | Fieldwork_Jan2018 | 8.2.18  | 22,6055  | 89,51953 | 25,908  | 0,0488   |
| 4_476 | Fieldwork_Jan2018 | 18.1.18 | 22,566   | 89,11323 | 25,908  | 0,037    |
| 4_477 | Fieldwork_Jan2018 | 5.2.18  | 22,4891  | 89,32499 | 25,908  | 0,0172   |
| 4_478 | Fieldwork_Jan2018 | 8.2.18  | 22,61357 | 89,49372 | 25,908  | 0,0013   |
| 4_479 | Fieldwork_Jan2018 | 27.1.18 | 22,33075 | 89,11208 | 27,432  | 0,25     |
| 4_480 | Fieldwork_Jan2018 | 24.1.18 | 22,45122 | 89,16372 | 27,432  | 0,2      |
| 4_481 | Fieldwork_Jan2018 | 19.1.18 | 22,44801 | 89,07623 | 27,432  | 0,0793   |
| 4_482 | Fieldwork_Jan2018 | 18.1.18 | 22,57003 | 89,13445 | 27,432  | 0,05844  |
| 4_483 | Fieldwork_Jan2018 | 5.2.18  | 22,49345 | 89,30868 | 27,432  | 0,0533   |
| 4_484 | Fieldwork_Jan2018 | 19.1.18 | 22,46363 | 89,07866 | 27,432  | 0,0422   |
| 4_485 | Fieldwork_Jan2018 | 19.1.18 | 22,46378 | 89,07859 | 28,956  | 0,15     |
| 4_486 | Fieldwork_Jan2018 | 19.1.18 | 22,46238 | 89,07818 | 28,956  | 0,12     |
| 4_487 | Fieldwork_Jan2018 | 24.1.18 | 22,45134 | 89,15625 | 28,956  | 0,0371   |
| 4_488 | Fieldwork_Jan2018 | 19.1.18 | 22,4535  | 89,08022 | 29,2608 | 0,0254   |
| 4_489 | Fieldwork_Jan2018 | 4.2.18  | 22,63813 | 89,3126  | 30,48   | 0,38     |
| 4_490 | Fieldwork_Jan2018 |         | 22,5445  | 89,18167 | 30,48   | 0,16     |
| 4_491 | Fieldwork_Jan2018 | 8.2.18  | 22,60601 | 89,5107  | 30,48   | 0,0179   |
| 4_492 | Fieldwork_Jan2018 | 6.2.18  | 22,49556 | 89,33606 | 31,242  | 0,0193   |
| 4_493 | Fieldwork_Jan2018 | 17.1.18 | 22,5746  | 89,13255 | 32,004  | 0,017738 |
| 4_494 | Fieldwork_Jan2018 | 18.1.18 | 22,56743 | 89,12923 | 33,528  | 0,16     |
| 4_495 | Fieldwork_Jan2018 | 22.1.18 | 22,66113 | 89,07094 | 33,528  | 0,15     |
| 4_496 | Fieldwork_Jan2018 | 29.1.18 | 22,56858 | 89,12016 | 33,528  | 0,13     |

|       |                   |         |          |          |         |        |
|-------|-------------------|---------|----------|----------|---------|--------|
| 4_497 | Fieldwork_Jan2018 | 8.2.18  | 22,61725 | 89,49113 | 33,528  | 0,12   |
| 4_498 | Fieldwork_Jan2018 | 19.1.18 | 22,45943 | 89,07632 | 33,528  | 0,12   |
| 4_499 | Fieldwork_Jan2018 | 19.1.18 | 22,45628 | 89,0788  | 33,528  | 0,1    |
| 4_500 | Fieldwork_Jan2018 | 8.2.18  | 22,60582 | 89,51401 | 33,528  | 0,0364 |
| 4_501 | Fieldwork_Jan2018 | 29.1.18 | 22,56491 | 89,11226 | 33,528  | 0,0073 |
| 4_502 | Fieldwork_Jan2018 | 8.2.18  | 22,61323 | 89,49368 | 33,528  | 0,0019 |
| 4_503 | Fieldwork_Jan2018 | 6.2.18  | 22,49838 | 89,34991 | 35,052  | 0,66   |
| 4_504 | Fieldwork_Jan2018 | 4.2.18  | 22,64208 | 89,34324 | 35,052  | 0,21   |
| 4_505 | Fieldwork_Jan2018 | 5.2.18  | 22,4955  | 89,31065 | 35,052  | 0,0037 |
| 4_506 | Fieldwork_Jan2018 | 5.2.18  | 22,49323 | 89,32499 | 35,052  | 0,0014 |
| 4_507 | Fieldwork_Jan2018 | 8.2.18  | 22,60852 | 89,49713 | 35,052  | 0,0011 |
| 4_508 | Fieldwork_Jan2018 | 22.1.18 | 22,66129 | 89,07592 | 36,576  | 0,26   |
| 4_509 | Fieldwork_Jan2018 | 18.1.18 | 22,56776 | 89,12938 | 36,576  | 0,14   |
| 4_510 | Fieldwork_Jan2018 | 8.2.18  | 22,60975 | 89,49588 | 36,576  | 0,0012 |
| 4_511 | Fieldwork_Jan2018 |         | 22,51726 | 89,15523 | 37,4904 | 0,23   |
| 4_512 | Fieldwork_Jan2018 | 4.2.18  | 22,64302 | 89,34376 | 38,1    | 0,32   |
| 4_513 | Fieldwork_Jan2018 | 20.1.18 | 22,45568 | 89,07996 | 38,1    | 0,13   |
| 4_514 | Fieldwork_Jan2018 | 28.1.18 | 22,46667 | 89,07957 | 38,1    | 0,0048 |
| 4_515 | Fieldwork_Jan2018 | 30.1.18 | 22,66239 | 89,05534 | 39,624  | 0,2    |
| 4_516 | Fieldwork_Jan2018 | 19.1.18 | 22,45753 | 89,07751 | 39,624  | 0,13   |
| 4_517 | Fieldwork_Jan2018 | 18.1.18 | 22,56994 | 89,11691 | 39,624  | 0,0937 |
| 4_518 | Fieldwork_Jan2018 | 19.1.18 | 22,44297 | 89,0751  | 39,624  | 0,035  |
| 4_519 | Fieldwork_Jan2018 | 4.2.18  | 22,64059 | 89,31537 | 41,148  | 0,51   |
| 4_520 | Fieldwork_Jan2018 | 4.2.18  | 22,64055 | 89,31978 | 41,148  | 0,46   |
| 4_521 | Fieldwork_Jan2018 | 4.2.18  | 22,63895 | 89,32457 | 41,148  | 0,38   |
| 4_522 | Fieldwork_Jan2018 | 30.1.18 | 22,65991 | 89,04629 | 41,148  | 0,27   |
| 4_523 | Fieldwork_Jan2018 | 18.1.18 | 22,5702  | 89,1192  | 42,672  | 0,13   |
| 4_524 | Fieldwork_Jan2018 | 18.1.18 | 22,56847 | 89,11569 | 42,672  | 0,0612 |
| 4_525 | Fieldwork_Jan2018 | 17.1.18 | 22,44675 | 89,15595 | 42,672  | 0,0026 |
| 4_526 | Fieldwork_Jan2018 | 4.2.18  | 22,63882 | 89,32591 | 44,196  | 0,31   |
| 4_527 | Fieldwork_Jan2018 | 28.1.18 | 22,45962 | 89,07629 | 44,196  | 0,19   |
| 4_528 | Fieldwork_Jan2018 | 29.1.18 | 22,45523 | 89,08012 | 44,196  | 0,13   |
| 4_529 | Fieldwork_Jan2018 | 6.2.18  | 22,49773 | 89,33532 | 45,72   | 0,3    |
| 4_530 | Fieldwork_Jan2018 | 30.1.18 | 22,65979 | 89,04275 | 45,72   | 0,25   |
| 4_531 | Fieldwork_Jan2018 | 30.1.18 | 22,65323 | 89,04246 | 45,72   | 0,22   |
| 4_532 | Fieldwork_Jan2018 | 6.2.18  | 22,49546 | 89,34735 | 48,768  | 0,48   |
| 4_533 | Fieldwork_Jan2018 | 17.1.18 | 22,44621 | 89,17705 | 48,768  | 0,27   |
| 4_534 | Fieldwork_Jan2018 | 18.1.18 | 22,56939 | 89,12641 | 48,768  | 0,2    |
| 4_535 | Fieldwork_Jan2018 | 4.2.18  | 22,64307 | 89,34359 | 48,768  | 0,2    |
| 4_536 | Fieldwork_Jan2018 | 5.2.18  | 22,49837 | 89,31645 | 48,768  | 0,0757 |
| 4_537 | Fieldwork_Jan2018 | 22.1.18 | 22,66247 | 89,0731  | 50,292  | 0,27   |
| 4_538 | Fieldwork_Jan2018 | 18.1.18 | 22,56981 | 89,12449 | 50,292  | 0,19   |
| 4_539 | Fieldwork_Jan2018 | 18.1.18 | 22,56937 | 89,1225  | 50,292  | 0,15   |
| 4_540 | Fieldwork_Jan2018 | 4.2.18  | 22,64179 | 89,33191 | 50,292  | 0,14   |
| 4_541 | Fieldwork_Jan2018 | 22.1.18 | 22,66131 | 89,06684 | 51,816  | 0,18   |
| 4_542 | Fieldwork_Jan2018 | 20.1.18 | 22,45539 | 89,08008 | 51,816  | 0,14   |
| 4_543 | Fieldwork_Jan2018 | 30.1.18 | 22,6629  | 89,05692 | 54,864  | 0,19   |

|       |                   |         |          |          |   |        |        |
|-------|-------------------|---------|----------|----------|---|--------|--------|
| 4_544 | Fieldwork_Jan2018 | 21.1.18 | 22,33435 | 89,12898 |   | 57,912 | 0,0039 |
| 4_545 | Fieldwork_Jan2018 | 4.2.18  | 22,63863 | 89,31624 |   | 67,056 | 0,52   |
| 4_546 | MAR sites         |         | 22,6476  | 89,42403 | 0 | 18,288 | 0      |
| 4_547 | MAR sites         |         | 22,64139 | 89,42094 | 0 | 18,288 | 0      |
| 4_548 | MAR sites         |         | 22,57718 | 89,12938 | 0 | 18,288 | 0      |
| 4_549 | MAR sites         |         | 22,29895 | 89,78232 | 0 | 19,812 | 0      |
| 4_550 | MAR sites         |         | 22,52753 | 89,44522 | 0 | 19,812 | 0      |
| 4_551 | MAR sites         |         | 22,471   | 89,208   | 0 | 19,812 | 0,1    |
| 4_552 | MAR sites         |         | 22,3117  | 89,13739 | 0 | 19,812 | 0      |
| 4_553 | MAR sites         |         | 22,50709 | 89,19905 | 0 | 19,812 | 0      |
| 4_554 | MAR sites         |         | 22,50924 | 89,19971 | 0 | 19,812 | 0      |
| 4_555 | MAR sites         |         | 22,6674  | 89,5128  | 0 | 19,812 | 0,01   |
| 4_556 | MAR sites         |         | 22,57573 | 89,87375 | 0 | 21,336 | 0,3    |
| 4_557 | MAR sites         |         | 22,33789 | 89,82123 | 0 | 21,336 | 0      |
| 4_558 | MAR sites         |         | 22,50326 | 89,48449 | 0 | 21,336 | 0,01   |
| 4_559 | MAR sites         |         | 22,53388 | 89,49137 | 0 | 21,336 | -9999  |
| 4_560 | MAR sites         |         | 22,55174 | 89,30055 | 0 | 21,336 | 0      |
| 4_561 | MAR sites         |         | 22,45661 | 89,29697 | 0 | 21,336 | 0,01   |
| 4_562 | MAR sites         |         | 22,4709  | 89,1509  | 0 | 21,336 | 0,05   |
| 4_563 | MAR sites         |         | 22,5741  | 89,5004  | 0 | 21,336 | 0,5    |
| 4_564 | MAR sites         |         | 22,405   | 89,6435  | 0 | 21,336 | 0,025  |
| 4_565 | MAR sites         |         | 22,5678  | 89,3298  | 0 | 21,336 | 0,01   |
| 4_566 | MAR sites         |         | 22,3164  | 89,8444  | 0 | 21,336 | 0      |
| 4_567 | MAR sites         |         | 22,72432 | 89,89086 | 0 | 22,86  | 0,1    |
| 4_568 | MAR sites         |         | 22,48692 | 89,86239 | 0 | 22,86  | 0      |
| 4_569 | MAR sites         |         | 22,44167 | 89,80404 | 0 | 22,86  | 0,1    |
| 4_570 | MAR sites         |         | 22,60802 | 89,50882 | 0 | 22,86  | 0      |
| 4_571 | MAR sites         |         | 22,63334 | 89,44046 | 0 | 22,86  | 0      |
| 4_572 | MAR sites         |         | 22,5439  | 89,17336 | 0 | 22,86  | 0,01   |
| 4_573 | MAR sites         |         | 22,31526 | 89,11287 | 0 | 22,86  | 0,01   |
| 4_574 | MAR sites         |         | 22,34008 | 89,10728 | 0 | 22,86  | 0,05   |
| 4_575 | MAR sites         |         | 22,46066 | 89,21259 | 0 | 22,86  | 0      |
| 4_576 | MAR sites         |         | 22,6338  | 89,5144  | 0 | 22,86  | 0      |
| 4_577 | MAR sites         |         | 22,5198  | 89,4916  | 0 | 22,86  | 0      |
| 4_578 | MAR sites         |         | 22,41    | 89,6611  | 0 | 22,86  | 0,01   |
| 4_579 | MAR sites         |         | 22,46502 | 89,68173 | 0 | 24,384 | 0      |
| 4_580 | MAR sites         |         | 22,60174 | 89,5227  | 0 | 24,384 | 0      |
| 4_581 | MAR sites         |         | 22,66754 | 89,41473 | 0 | 24,384 | 0,05   |
| 4_582 | MAR sites         |         | 22,60207 | 89,44875 | 0 | 24,384 | 0,01   |
| 4_583 | MAR sites         |         | 22,5     | 89,25729 | 0 | 24,384 | 0,01   |
| 4_584 | MAR sites         |         | 22,4765  | 89,1492  | 0 | 24,384 | 0,2    |
| 4_585 | MAR sites         |         | 22,452   | 89,176   | 0 | 24,384 | 0      |
| 4_586 | MAR sites         |         | 22,5474  | 89,1784  | 0 | 24,384 | 0,1    |
| 4_587 | MAR sites         |         | 22,6719  | 89,439   | 0 | 24,384 | 0,01   |
| 4_588 | MAR sites         |         | 22,3469  | 89,1019  | 0 | 24,384 | 0,05   |
| 4_589 | MAR sites         |         | 22,25596 | 89,83038 | 0 | 25,908 | 0      |
| 4_590 | MAR sites         |         | 22,59776 | 89,4668  | 0 | 25,908 | 0,025  |

|       |           |          |          |   |        |       |
|-------|-----------|----------|----------|---|--------|-------|
| 4_591 | MAR sites | 22,62168 | 89,83602 | 0 | 27,432 | 0,1   |
| 4_592 | MAR sites | 22,54123 | 89,63853 | 0 | 27,432 | 0,01  |
| 4_593 | MAR sites | 22,48711 | 89,64051 | 0 | 27,432 | 0     |
| 4_594 | MAR sites | 22,447   | 89,708   | 0 | 27,432 | 0     |
| 4_595 | MAR sites | 22,45786 | 89,83478 | 0 | 27,432 | 0     |
| 4_596 | MAR sites | 22,2928  | 89,78298 | 0 | 27,432 | 0     |
| 4_597 | MAR sites | 22,64622 | 89,44556 | 0 | 27,432 | 0     |
| 4_598 | MAR sites | 22,62899 | 89,52837 | 0 | 27,432 | 0,01  |
| 4_599 | MAR sites | 22,66055 | 89,49564 | 0 | 27,432 | 0,01  |
| 4_600 | MAR sites | 22,3891  | 89,012   | 0 | 27,432 | 0,025 |
| 4_601 | MAR sites | 22,5592  | 89,8599  | 0 | 27,432 | 0     |
| 4_602 | MAR sites | 22,5795  | 89,9198  | 0 | 27,432 | 0,025 |
| 4_603 | MAR sites | 22,55606 | 89,65313 | 0 | 28,956 | 0,01  |
| 4_604 | MAR sites | 22,48683 | 89,3501  | 0 | 28,956 | 0     |
| 4_605 | MAR sites | 22,43722 | 89,04941 | 0 | 28,956 | 0     |
| 4_606 | MAR sites | 22,37567 | 89,06893 | 0 | 28,956 | 0,025 |
| 4_607 | MAR sites | 22,70015 | 89,86078 | 0 | 30,48  | 0,2   |
| 4_608 | MAR sites | 22,47287 | 89,69396 | 0 | 30,48  | 0     |
| 4_609 | MAR sites | 22,50143 | 89,51763 | 0 | 30,48  | 0,025 |
| 4_610 | MAR sites | 22,57838 | 89,47195 | 0 | 30,48  | 0,01  |
| 4_611 | MAR sites | 22,49693 | 89,30923 | 0 | 30,48  | 0,01  |
| 4_612 | MAR sites | 22,3864  | 89,0854  | 0 | 30,48  | 0,3   |
| 4_613 | MAR sites | 22,37315 | 89,08025 | 0 | 30,48  | 0,02  |
| 4_614 | MAR sites | 22,45217 | 89,15574 | 0 | 30,48  | 0,2   |
| 4_615 | MAR sites | 22,47077 | 89,21925 | 0 | 30,48  | 0,01  |
| 4_616 | MAR sites | 22,39121 | 89,0153  | 0 | 30,48  | 0     |
| 4_617 | MAR sites | 22,448   | 89,0389  | 0 | 30,48  | 0     |
| 4_618 | MAR sites | 22,3538  | 89,1053  | 0 | 30,48  | 0,01  |
| 4_619 | MAR sites | 22,40724 | 89,68082 | 0 | 32,004 | 0     |
| 4_620 | MAR sites | 22,64247 | 89,50693 | 0 | 32,004 | 0     |
| 4_621 | MAR sites | 22,6551  | 89,49141 | 0 | 32,004 | 0,1   |
| 4_622 | MAR sites | 22,3335  | 89,8093  | 0 | 32,004 | 0,025 |
| 4_623 | MAR sites | 22,51669 | 89,72033 | 0 | 33,528 | 0,025 |
| 4_624 | MAR sites | 22,61697 | 89,27823 | 0 | 33,528 | 0,01  |
| 4_625 | MAR sites | 22,49615 | 89,31657 | 0 | 33,528 | 0     |
| 4_626 | MAR sites | 22,57386 | 89,13497 | 0 | 33,528 | 0,05  |
| 4_627 | MAR sites | 22,64109 | 89,47532 | 0 | 35,052 | 0,01  |
| 4_628 | MAR sites | 22,43916 | 89,05666 | 0 | 35,052 | 0,1   |
| 4_629 | MAR sites | 22,33421 | 89,04314 | 0 | 35,052 | 0,2   |
| 4_630 | MAR sites | 22,54964 | 89,58803 | 0 | 36,576 | 0,05  |
| 4_631 | MAR sites | 22,50271 | 89,86145 | 0 | 36,576 | 0,01  |
| 4_632 | MAR sites | 22,5966  | 89,5146  | 0 | 39,624 | 0,01  |
| 4_633 | MAR sites | 22,21517 | 89,82979 | 0 | 41,148 | 0,3   |
| 4_634 | MAR sites | 22,31387 | 89,05113 | 0 | 44,196 | 0     |
| 4_635 | MAR sites | 22,44333 | 89,05973 | 0 | 44,196 | 0,1   |
| 4_636 | MAR sites | 22,38776 | 89,06049 | 0 | 45,72  | 0,2   |
| 4_637 | MAR sites | 22,49751 | 89,07548 | 0 | 45,72  | 0,2   |

|       |                 |          |          |    |         |          |
|-------|-----------------|----------|----------|----|---------|----------|
| 4_638 | MAR sites       | 22,37602 | 89,05099 | 0  | 45,72   | 0,01     |
| 4_639 | MAR sites       | 22,59908 | 89,5175  | 0  | 47,244  | 0,1      |
| 4_640 | Vanderbilt_data | 22,4584  | 89,2139  | 28 | 8,5344  | 0,00608  |
| 4_641 | Vanderbilt_data | 22,4576  | 89,3003  | 30 | 9,144   | 0,107    |
| 4_642 | Vanderbilt_data | 22,7259  | 89,8915  | 33 | 10,0584 | 0,0444   |
| 4_643 | Vanderbilt_data | 22,3866  | 89,8736  | 35 | 10,668  | 0,0013   |
| 4_644 | Vanderbilt_data | 22,3873  | 89,8716  | 35 | 10,668  | 0,00286  |
| 4_645 | Vanderbilt_data | 22,5488  | 89,5841  | 35 | 10,668  | 0,00119  |
| 4_646 | Vanderbilt_data | 22,4624  | 89,2127  | 35 | 10,668  | 0,00813  |
| 4_647 | Vanderbilt_data | 22,461   | 89,2158  | 35 | 10,668  | 0,00926  |
| 4_648 | Vanderbilt_data | 22,4596  | 89,2143  | 35 | 10,668  | 0,0542   |
| 4_649 | Vanderbilt_data | 22,4589  | 89,2128  | 35 | 10,668  | 0,0135   |
| 4_650 | Vanderbilt_data | 22,5304  | 89,5893  | 40 | 12,192  | 0,000934 |
| 4_651 | Vanderbilt_data | 22,4614  | 89,2137  | 40 | 12,192  | 0,0013   |
| 4_652 | Vanderbilt_data | 22,7186  | 89,8881  | 40 | 12,192  | 0,0306   |
| 4_653 | Vanderbilt_data | 22,7243  | 89,8895  | 40 | 12,192  | 0,0142   |
| 4_654 | Vanderbilt_data | 22,5777  | 89,1315  | 40 | 12,192  | 0,0299   |
| 4_655 | Vanderbilt_data | 22,6343  | 89,8374  | 40 | 12,192  | 0,0361   |
| 4_656 | Vanderbilt_data | 22,597   | 89,456   | 40 | 12,192  | 0,00434  |
| 4_657 | Vanderbilt_data | 22,541   | 89,5799  | 45 | 13,716  | 0,000748 |
| 4_658 | Vanderbilt_data | 22,4571  | 89,2145  | 45 | 13,716  | 0,0414   |
| 4_659 | Vanderbilt_data | 22,7266  | 89,8921  | 45 | 13,716  | 0,0356   |
| 4_660 | Vanderbilt_data | 22,4619  | 89,9029  | 45 | 13,716  | 0,00427  |
| 4_661 | Vanderbilt_data | 22,4635  | 89,9019  | 45 | 13,716  | 0,000667 |
| 4_662 | Vanderbilt_data | 22,4638  | 89,9001  | 45 | 13,716  | 0,00222  |
| 4_663 | Vanderbilt_data | 22,4667  | 89,8996  | 45 | 13,716  | 0,00815  |
| 4_664 | Vanderbilt_data | 22,4671  | 89,8992  | 45 | 13,716  | 0,00946  |
| 4_665 | Vanderbilt_data | 22,4671  | 89,8974  | 45 | 13,716  | 0,00943  |
| 4_666 | Vanderbilt_data | 22,5136  | 89,5147  | 45 | 13,716  | 0,000861 |
| 4_667 | Vanderbilt_data | 22,4015  | 89,6568  | 45 | 13,716  | 0,0164   |
| 4_668 | Vanderbilt_data | 22,5805  | 89,1325  | 45 | 13,716  | 0,00782  |
| 4_669 | Vanderbilt_data | 22,4564  | 89,2972  | 45 | 13,716  | 0,00524  |
| 4_670 | Vanderbilt_data | 22,5053  | 89,8501  | 45 | 13,716  | 0,00208  |
| 4_671 | Vanderbilt_data | 22,5242  | 89,6554  | 45 | 13,716  | 0,00764  |
| 4_672 | Vanderbilt_data | 22,5244  | 89,6549  | 45 | 13,716  | 0,00792  |
| 4_673 | Vanderbilt_data | 22,5402  | 89,6446  | 45 | 13,716  | 0,016    |
| 4_674 | Vanderbilt_data | 22,5409  | 89,646   | 45 | 13,716  | 0,0246   |
| 4_675 | Vanderbilt_data | 22,6346  | 89,8365  | 45 | 13,716  | 0,0258   |
| 4_676 | Vanderbilt_data | 22,4568  | 89,8352  | 45 | 13,716  | 0,00488  |
| 4_677 | Vanderbilt_data | 22,4575  | 89,2149  | 50 | 15,24   | 0,0498   |
| 4_678 | Vanderbilt_data | 22,4604  | 89,2127  | 50 | 15,24   | 0,0253   |
| 4_679 | Vanderbilt_data | 22,6307  | 89,4415  | 50 | 15,24   | 0,00092  |
| 4_680 | Vanderbilt_data | 22,6343  | 89,8364  | 50 | 15,24   | 0,0164   |
| 4_681 | Vanderbilt_data | 22,5924  | 89,4708  | 50 | 15,24   | 0,121    |
| 4_682 | Vanderbilt_data | 22,55    | 89,5875  | 55 | 16,764  | 0,00155  |
| 4_683 | Vanderbilt_data | 22,5444  | 89,5821  | 55 | 16,764  | 0,000608 |
| 4_684 | Vanderbilt_data | 22,5431  | 89,5811  | 55 | 16,764  | 0,000643 |

|       |                 |         |         |    |         |          |
|-------|-----------------|---------|---------|----|---------|----------|
| 4_685 | Vanderbilt_data | 22,5424 | 89,5899 | 55 | 16,764  | 0,000421 |
| 4_686 | Vanderbilt_data | 22,5387 | 89,585  | 55 | 16,764  | 0,000671 |
| 4_687 | Vanderbilt_data | 22,462  | 89,2126 | 55 | 16,764  | 0,0389   |
| 4_688 | Vanderbilt_data | 22,4597 | 89,2149 | 55 | 16,764  | 0,0215   |
| 4_689 | Vanderbilt_data | 22,7237 | 89,892  | 55 | 16,764  | 0,0113   |
| 4_690 | Vanderbilt_data | 22,4594 | 89,8928 | 55 | 16,764  | 0,0412   |
| 4_691 | Vanderbilt_data | 22,6245 | 89,1317 | 55 | 16,764  | 0,0996   |
| 4_692 | Vanderbilt_data | 22,6249 | 89,1302 | 55 | 16,764  | 0,112    |
| 4_693 | Vanderbilt_data | 22,4566 | 89,2974 | 55 | 16,764  | 0,0148   |
| 4_694 | Vanderbilt_data | 22,4561 | 89,2971 | 55 | 16,764  | 0,0165   |
| 4_695 | Vanderbilt_data | 22,6261 | 89,8316 | 55 | 16,764  | 0,37     |
| 4_696 | Vanderbilt_data | 22,5082 | 89,1986 | 55 | 16,764  | 0,0277   |
| 4_697 | Vanderbilt_data | 22,4415 | 89,0554 | 55 | 16,764  | 0,00148  |
| 4_698 | Vanderbilt_data | 22,5921 | 89,4703 | 55 | 16,764  | 0,128    |
| 4_699 | Vanderbilt_data | 22,6004 | 89,4484 | 55 | 16,764  | 0,139    |
| 4_700 | Vanderbilt_data | 22,5379 | 89,5829 | 60 | 18,288  | 0,000129 |
| 4_701 | Vanderbilt_data | 22,725  | 89,8916 | 60 | 18,288  | 0,0118   |
| 4_702 | Vanderbilt_data | 22,4644 | 89,9004 | 60 | 18,288  | 0,0395   |
| 4_703 | Vanderbilt_data | 22,4627 | 89,8935 | 60 | 18,288  | 0,0102   |
| 4_704 | Vanderbilt_data | 22,5047 | 89,5217 | 60 | 18,288  | 0,00463  |
| 4_705 | Vanderbilt_data | 22,5047 | 89,5263 | 60 | 18,288  | 0,0126   |
| 4_706 | Vanderbilt_data | 22,5063 | 89,5301 | 60 | 18,288  | 0,00354  |
| 4_707 | Vanderbilt_data | 22,6235 | 89,1316 | 60 | 18,288  | 0,0355   |
| 4_708 | Vanderbilt_data | 22,6232 | 89,1306 | 60 | 18,288  | 0,0681   |
| 4_709 | Vanderbilt_data | 22,4503 | 89,157  | 60 | 18,288  | 0,00135  |
| 4_710 | Vanderbilt_data | 22,4564 | 89,2985 | 60 | 18,288  | 0,0158   |
| 4_711 | Vanderbilt_data | 22,5415 | 89,6431 | 60 | 18,288  | 0,0276   |
| 4_712 | Vanderbilt_data | 22,4574 | 89,8357 | 60 | 18,288  | 0,0124   |
| 4_713 | Vanderbilt_data | 22,5372 | 89,5822 | 64 | 19,5072 | 0,00158  |
| 4_714 | Vanderbilt_data | 22,3949 | 89,8728 | 65 | 19,812  | 0,0484   |
| 4_715 | Vanderbilt_data | 22,5506 | 89,5887 | 65 | 19,812  | 0,00284  |
| 4_716 | Vanderbilt_data | 22,5459 | 89,5842 | 65 | 19,812  | 0,000372 |
| 4_717 | Vanderbilt_data | 22,5409 | 89,5796 | 65 | 19,812  | 0,000716 |
| 4_718 | Vanderbilt_data | 22,7264 | 89,889  | 65 | 19,812  | 0,0125   |
| 4_719 | Vanderbilt_data | 22,7251 | 89,8891 | 65 | 19,812  | 0,0425   |
| 4_720 | Vanderbilt_data | 22,5794 | 89,1278 | 65 | 19,812  | 0,199    |
| 4_721 | Vanderbilt_data | 22,6231 | 89,1292 | 65 | 19,812  | 0,0718   |
| 4_722 | Vanderbilt_data | 22,6238 | 89,1302 | 65 | 19,812  | 0,144    |
| 4_723 | Vanderbilt_data | 22,716  | 89,1864 | 65 | 19,812  | 0,28     |
| 4_724 | Vanderbilt_data | 22,4572 | 89,2985 | 65 | 19,812  | 0,476    |
| 4_725 | Vanderbilt_data | 22,4576 | 89,2996 | 65 | 19,812  | 0,0361   |
| 4_726 | Vanderbilt_data | 22,6249 | 89,8332 | 65 | 19,812  | 0,161    |
| 4_727 | Vanderbilt_data | 22,5966 | 89,4674 | 65 | 19,812  | 0,00495  |
| 4_728 | Vanderbilt_data | 22,5956 | 89,4665 | 65 | 19,812  | 0,0107   |
| 4_729 | Vanderbilt_data | 22,3926 | 89,8729 | 70 | 21,336  | 0,0345   |
| 4_730 | Vanderbilt_data | 22,5433 | 89,5779 | 70 | 21,336  | 0,000641 |
| 4_731 | Vanderbilt_data | 22,4608 | 89,2133 | 70 | 21,336  | 0,0119   |



|       |                 |         |         |     |         |          |
|-------|-----------------|---------|---------|-----|---------|----------|
| 4_732 | Vanderbilt_data | 22,7234 | 89,8905 | 70  | 21,336  | 0,207    |
| 4_733 | Vanderbilt_data | 22,7248 | 89,8909 | 70  | 21,336  | 0,118    |
| 4_734 | Vanderbilt_data | 22,7262 | 89,8913 | 70  | 21,336  | 0,00697  |
| 4_735 | Vanderbilt_data | 22,6392 | 89,4415 | 70  | 21,336  | 0,00516  |
| 4_736 | Vanderbilt_data | 22,5052 | 89,8495 | 70  | 21,336  | 0,0122   |
| 4_737 | Vanderbilt_data | 22,5048 | 89,851  | 70  | 21,336  | 0,00339  |
| 4_738 | Vanderbilt_data | 22,617  | 89,2817 | 70  | 21,336  | 0,258    |
| 4_739 | Vanderbilt_data | 22,4405 | 89,0586 | 70  | 21,336  | 0,116    |
| 4_740 | Vanderbilt_data | 22,9818 | 89,4686 | 70  | 21,336  | 0,00464  |
| 4_741 | Vanderbilt_data | 22,6454 | 89,4455 | 70  | 21,336  | 0,0176   |
| 4_742 | Vanderbilt_data | 22,4406 | 89,0556 | 72  | 21,9456 | 0,00148  |
| 4_743 | Vanderbilt_data | 22,5463 | 89,5779 | 75  | 22,86   | 0,000363 |
| 4_744 | Vanderbilt_data | 22,632  | 89,4387 | 75  | 22,86   | 0,00604  |
| 4_745 | Vanderbilt_data | 22,4871 | 89,3487 | 80  | 24,384  | 0,104    |
| 4_746 | Vanderbilt_data | 22,6278 | 89,1316 | 80  | 24,384  | 0,0713   |
| 4_747 | Vanderbilt_data | 22,6162 | 89,2783 | 80  | 24,384  | 0,0751   |
| 4_748 | Vanderbilt_data | 22,542  | 89,6389 | 80  | 24,384  | 0,0403   |
| 4_749 | Vanderbilt_data | 22,5412 | 89,643  | 80  | 24,384  | 0,0374   |
| 4_750 | Vanderbilt_data | 22,4558 | 89,8359 | 80  | 24,384  | 0,00293  |
| 4_751 | Vanderbilt_data | 22,578  | 89,1283 | 85  | 25,908  | 0,125    |
| 4_752 | Vanderbilt_data | 22,5781 | 89,1279 | 85  | 25,908  | 0,011    |
| 4_753 | Vanderbilt_data | 22,5688 | 89,456  | 85  | 25,908  | 0,00067  |
| 4_754 | Vanderbilt_data | 22,3899 | 89,8742 | 90  | 27,432  | 0,00978  |
| 4_755 | Vanderbilt_data | 22,5783 | 89,1284 | 90  | 27,432  | 0,0177   |
| 4_756 | Vanderbilt_data | 22,6221 | 89,1285 | 90  | 27,432  | 0,00816  |
| 4_757 | Vanderbilt_data | 22,5407 | 89,6451 | 90  | 27,432  | 0,0152   |
| 4_758 | Vanderbilt_data | 22,4401 | 89,0551 | 90  | 27,432  | 0,00148  |
| 4_759 | Vanderbilt_data | 22,4537 | 89,8317 | 90  | 27,432  | 0,00801  |
| 4_760 | Vanderbilt_data | 22,4595 | 89,8371 | 90  | 27,432  | 0,000729 |
| 4_761 | Vanderbilt_data | 22,635  | 89,4354 | 95  | 28,956  | 0,00101  |
| 4_762 | Vanderbilt_data | 22,6345 | 89,435  | 95  | 28,956  | 0,00091  |
| 4_763 | Vanderbilt_data | 22,6248 | 89,1343 | 95  | 28,956  | 0,0968   |
| 4_764 | Vanderbilt_data | 22,6165 | 89,2808 | 95  | 28,956  | 0,0877   |
| 4_765 | Vanderbilt_data | 22,6154 | 89,2787 | 95  | 28,956  | 0,0687   |
| 4_766 | Vanderbilt_data | 22,6174 | 89,2771 | 95  | 28,956  | 0,134    |
| 4_767 | Vanderbilt_data | 22,4861 | 89,6423 | 100 | 30,48   | 0,000899 |
| 4_768 | Vanderbilt_data | 22,5771 | 89,1266 | 100 | 30,48   | 0,0829   |
| 4_769 | Vanderbilt_data | 22,617  | 89,2782 | 100 | 30,48   | 0,0827   |
| 4_770 | Vanderbilt_data | 22,6171 | 89,2794 | 100 | 30,48   | 0,12     |
| 4_771 | Vanderbilt_data | 22,6173 | 89,2798 | 100 | 30,48   | 0,0794   |
| 4_772 | Vanderbilt_data | 22,5991 | 89,4459 | 100 | 30,48   | 0,0414   |
| 4_773 | Vanderbilt_data | 22,6464 | 89,4455 | 100 | 30,48   | 0,00618  |
| 4_774 | Vanderbilt_data | 22,3954 | 89,8738 | 105 | 32,004  | 0,0903   |
| 4_775 | Vanderbilt_data | 22,621  | 89,1276 | 105 | 32,004  | 0,0195   |
| 4_776 | Vanderbilt_data | 22,6223 | 89,1295 | 105 | 32,004  | 0,104    |
| 4_777 | Vanderbilt_data | 22,5792 | 89,1332 | 110 | 33,528  | 0,0843   |
| 4_778 | Vanderbilt_data | 22,6177 | 89,2771 | 110 | 33,528  | 0,0643   |

|       |                 |         |         |     |         |          |
|-------|-----------------|---------|---------|-----|---------|----------|
| 4_779 | Vanderbilt_data | 22,5074 | 89,2012 | 110 | 33,528  | 0,269    |
| 4_780 | Vanderbilt_data | 22,5698 | 89,4599 | 113 | 34,4424 | 0,00184  |
| 4_781 | Vanderbilt_data | 22,5871 | 89,4681 | 114 | 34,7472 | 0,00472  |
| 4_782 | Vanderbilt_data | 22,7122 | 89,1897 | 115 | 35,052  | 0,0369   |
| 4_783 | Vanderbilt_data | 22,5074 | 89,8617 | 115 | 35,052  | 0,000814 |
| 4_784 | Vanderbilt_data | 22,4377 | 89,0567 | 115 | 35,052  | 0,245    |
| 4_785 | Vanderbilt_data | 22,7194 | 89,188  | 120 | 36,576  | 0,197    |
| 4_786 | Vanderbilt_data | 22,6167 | 89,2769 | 120 | 36,576  | 0,0847   |
| 4_787 | Vanderbilt_data | 22,4387 | 89,0582 | 120 | 36,576  | 0,157    |
| 4_788 | Vanderbilt_data | 22,4416 | 89,0571 | 120 | 36,576  | 0,13     |
| 4_789 | Vanderbilt_data | 22,4387 | 89,0556 | 120 | 36,576  | 0,00148  |
| 4_790 | Vanderbilt_data | 22,4366 | 89,0567 | 120 | 36,576  | 0,00148  |
| 4_791 | Vanderbilt_data | 22,5784 | 89,4718 | 120 | 36,576  | 0,00309  |
| 4_792 | Vanderbilt_data | 22,5788 | 89,472  | 120 | 36,576  | 0,0154   |
| 4_793 | Vanderbilt_data | 22,4545 | 89,835  | 120 | 36,576  | 0,00406  |
| 4_794 | Vanderbilt_data | 22,6564 | 89,4432 | 120 | 36,576  | 0,0515   |
| 4_795 | Vanderbilt_data | 22,4786 | 89,3438 | 125 | 38,1    | 0,0315   |
| 4_796 | Vanderbilt_data | 22,4857 | 89,3519 | 125 | 38,1    | 0,124    |
| 4_797 | Vanderbilt_data | 22,6387 | 89,4426 | 125 | 38,1    | 0,00529  |
| 4_798 | Vanderbilt_data | 22,5786 | 89,1254 | 125 | 38,1    | 0,177    |
| 4_799 | Vanderbilt_data | 22,7337 | 89,1767 | 125 | 38,1    | 0,211    |
| 4_800 | Vanderbilt_data | 22,4571 | 89,1556 | 125 | 38,1    | 0        |
| 4_801 | Vanderbilt_data | 22,6167 | 89,2796 | 125 | 38,1    | 0,124    |
| 4_802 | Vanderbilt_data | 22,6163 | 89,2804 | 125 | 38,1    | 0,0821   |
| 4_803 | Vanderbilt_data | 22,4376 | 89,0579 | 125 | 38,1    | 0,215    |
| 4_804 | Vanderbilt_data | 22,5862 | 89,4682 | 127 | 38,7096 | 0,00245  |
| 4_805 | Vanderbilt_data | 22,4771 | 89,3425 | 130 | 39,624  | 0,0113   |
| 4_806 | Vanderbilt_data | 22,4383 | 89,0576 | 130 | 39,624  | 0,216    |
| 4_807 | Vanderbilt_data | 22,5837 | 89,469  | 130 | 39,624  | 0,00549  |
| 4_808 | Vanderbilt_data | 22,6389 | 89,4433 | 140 | 42,672  | 0,000608 |
| 4_809 | Vanderbilt_data | 22,5767 | 89,125  | 140 | 42,672  | 0,225    |
| 4_810 | Vanderbilt_data | 22,6278 | 89,13   | 140 | 42,672  | 0,0452   |
| 4_811 | Vanderbilt_data | 22,4396 | 89,0563 | 140 | 42,672  | 0,136    |
| 4_812 | Vanderbilt_data | 22,6572 | 89,4429 | 140 | 42,672  | 0,0187   |
| 4_813 | Vanderbilt_data | 22,658  | 89,4552 | 140 | 42,672  | 0,0171   |
| 4_814 | Vanderbilt_data | 22,4513 | 89,1572 | 145 | 44,196  | 0,0939   |
| 4_815 | Vanderbilt_data | 22,6496 | 89,4422 | 145 | 44,196  | 0,00458  |
| 4_816 | Vanderbilt_data | 22,4825 | 89,3444 | 150 | 45,72   | 0,299    |
| 4_817 | Vanderbilt_data | 22,6153 | 89,2775 | 150 | 45,72   | 0,126    |
| 4_818 | Vanderbilt_data | 22,6164 | 89,2793 | 155 | 47,244  | 0,159    |
| 4_819 | Vanderbilt_data | 22,5075 | 89,1991 | 160 | 48,768  | 0,327    |
| 4_820 | Vanderbilt_data | 22,5074 | 89,1997 | 160 | 48,768  | 0,333    |
| 4_821 | Vanderbilt_data | 22,9742 | 89,4735 | 160 | 48,768  | 0,000418 |
| 4_822 | Vanderbilt_data | 22,6558 | 89,4437 | 160 | 48,768  | 0,043    |
| 4_823 | Vanderbilt_data | 22,6483 | 89,4537 | 160 | 48,768  | 0,0344   |
| 4_824 | Vanderbilt_data | 22,5061 | 89,198  | 163 | 49,6824 | 0,157    |
| 4_825 | Vanderbilt_data | 22,4892 | 89,3542 | 165 | 50,292  | 0,113    |

|       |                 |         |         |     |        |          |
|-------|-----------------|---------|---------|-----|--------|----------|
| 4_826 | Vanderbilt_data | 22,5795 | 89,127  | 165 | 50,292 | 0,197    |
| 4_827 | Vanderbilt_data | 22,5068 | 89,1992 | 165 | 50,292 | 0,25     |
| 4_828 | Vanderbilt_data | 22,5085 | 89,2009 | 165 | 50,292 | 0,328    |
| 4_829 | Vanderbilt_data | 22,6493 | 89,4546 | 165 | 50,292 | 0,019    |
| 4_830 | Vanderbilt_data | 22,7152 | 89,2015 | 170 | 51,816 | 0,307    |
| 4_831 | Vanderbilt_data | 22,7266 | 89,1912 | 170 | 51,816 | 0,145    |
| 4_832 | Vanderbilt_data | 22,453  | 89,1557 | 170 | 51,816 | 0        |
| 4_833 | Vanderbilt_data | 22,9688 | 89,4787 | 170 | 51,816 | 0,00281  |
| 4_834 | Vanderbilt_data | 22,6346 | 89,4348 | 175 | 53,34  | 0,00453  |
| 4_835 | Vanderbilt_data | 22,9721 | 89,4705 | 175 | 53,34  | 0,00104  |
| 4_836 | Vanderbilt_data | 22,486  | 89,35   | 180 | 54,864 | 0,208    |
| 4_837 | Vanderbilt_data | 22,4859 | 89,352  | 180 | 54,864 | 0,21     |
| 4_838 | Vanderbilt_data | 22,4563 | 89,2975 | 180 | 54,864 | 0,0349   |
| 4_839 | Vanderbilt_data | 22,4411 | 89,0566 | 180 | 54,864 | 0        |
| 4_840 | Vanderbilt_data | 22,7375 | 89,1891 | 185 | 56,388 | 0        |
| 4_841 | Vanderbilt_data | 22,5066 | 89,2051 | 185 | 56,388 | 0,376    |
| 4_842 | Vanderbilt_data | 22,509  | 89,2006 | 185 | 56,388 | 0,257    |
| 4_843 | Vanderbilt_data | 22,7145 | 89,1826 | 190 | 57,912 | 0,146    |
| 4_844 | Vanderbilt_data | 22,5068 | 89,1988 | 195 | 59,436 | 0,263    |
| 4_845 | Vanderbilt_data | 22,2641 | 89,2646 | 210 | 64,008 | 0,00044  |
| 4_846 | Vanderbilt_data | 22,736  | 89,175  | 215 | 65,532 | 0,000708 |
| 4_847 | Vanderbilt_data | 22,5781 | 89,1242 | 220 | 67,056 | 0,173    |
| 4_848 | Vanderbilt_data | 22,4519 | 89,1573 | 220 | 67,056 | 0,123    |
| 4_849 | Vanderbilt_data | 22,462  | 89,211  | 230 | 70,104 | 0,0731   |
| 4_850 | Vanderbilt_data | 22,7171 | 89,1806 | 230 | 70,104 | 0,16     |
| 4_851 | Vanderbilt_data | 22,7168 | 89,1935 | 235 | 71,628 | 0,225    |
| 4_852 | Vanderbilt_data | 22,7108 | 89,199  | 235 | 71,628 | 0,0163   |
| 4_853 | Vanderbilt_data | 22,486  | 89,3504 | 240 | 73,152 | 0,226    |
| 4_854 | Vanderbilt_data | 22,5092 | 89,1997 | 245 | 74,676 | 0,00964  |
| 4_855 | Vanderbilt_data | 22,4562 | 89,2972 | 250 | 76,2   | 0,0051   |
| 4_856 | Vanderbilt_data | 22,2678 | 89,2763 | 250 | 76,2   | 0,0326   |
| 4_857 | Vanderbilt_data | 22,7332 | 89,1874 | 255 | 77,724 | 0,0755   |
| 4_858 | Vanderbilt_data | 22,7271 | 89,185  | 260 | 79,248 | 0,116    |
| 4_859 | Vanderbilt_data | 22,7379 | 89,188  | 260 | 79,248 | 0,136    |
| 4_860 | Vanderbilt_data | 22,4556 | 89,2992 | 260 | 79,248 | 0,0104   |
| 4_861 | Vanderbilt_data | 22,2688 | 89,2775 | 270 | 82,296 | 0,0207   |
| 4_862 | Vanderbilt_data | 22,7219 | 89,1994 | 275 | 83,82  | 0,0459   |
| 4_863 | Vanderbilt_data | 22,9715 | 89,4778 | 295 | 89,916 | 0,000698 |
| 4_864 | Vanderbilt_data | 22,6188 | 89,839  | 300 | 91,44  | 0,00104  |
